# Supplementary material for: Comparison of Methods for Analyzing Left-Censored Occupational Exposure Data
Source: Oxford University Press journal article supplement (doi:10.1093/annhyg/meu067), 2014-09-26
Supplement: meu067_Supplementary_Data.zip [file meu067_Supplementary_Data.zip]

Archive with 3 entries (3 files):
- Copy_of_Biases_and_rMSEs_for_all_simulations___Comparison_of_Methods_for_Analyzing_Left_Censored_Occupational_Exposure_Data.xlsx
- supplementary_material_13_0265.R2_FINAL.docx
- Derivation_for_the_beta_factor_and_the_K_M_algorithm_REVISED.pdf
