# Supplementary material for: Comparison of Methods for Analyzing Left-Censored Occupational Exposure Data
Source: Oxford University Press journal article supplement (doi:10.1093/annhyg/meu067), 2014-09-26
Supplement: meu067_Supplementary_Data.zip [file meu067_Supplementary_Data.zip › Copy_of_Biases_and_rMSEs_for_all_simulations___Comparison_of_Methods_for_Analyzing_Left_Censored_Occupational_Exposure_Data.xlsx]

## Sheet: single LOD
Comparison of Methods for Analyzing Left-Censored Occupational Exposure Data
Tran Huynh, Gurumurthy Ramachandran, Sudipto Banerjee, Joao Monteiro, Mark Stenzel, Dale P Sandler, Lawrence S Engel, Richard K Kwok, Aaron Blair and Patricia A Stewart
N	p	Method	GSD	BiasAM	BiasGM	BiasGSD	Bias95th	BiasAM (ml-AM)	BiasAM (MVUE-AM)	rMSEam	rMSEgm	rMSEgsd	rMSE95th	rMSEam (ml-AM)	rMSEam (MVUE-AM)
5	0.1	beta	2	0.213126	1.48651	4.64904	2.32355	NaN	NaN	35.3266	33.4678	33.3925	52.3937	NaN	NaN
10	0.1	beta	2	0.12255	0.89991	1.5409	1.25746	NaN	NaN	24.7842	23.5177	18.3823	34.8529	NaN	NaN
20	0.1	beta	2	0.120655	0.39239	0.64451	0.870912	NaN	NaN	17.832	15.9359	12.1704	25.3672	NaN	NaN
30	0.1	beta	2	-0.298405	-0.20959	0.59758	0.32001	NaN	NaN	14.3144	12.9141	9.95976	20.3294	NaN	NaN
40	0.1	beta	2	-0.00759944	0.01297	0.492155	0.477987	NaN	NaN	12.4351	11.2205	9.23646	18.1476	NaN	NaN
50	0.1	beta	2	-0.487349	-0.47157	0.4054	-0.0848143	NaN	NaN	10.8641	9.84926	7.98572	15.6693	NaN	NaN
60	0.1	beta	2	-0.321228	-0.47995	0.543655	0.24845	NaN	NaN	10.1879	8.99165	7.38621	14.8282	NaN	NaN
70	0.1	beta	2	0.13662	-0.09439	0.631135	0.768538	NaN	NaN	9.11161	8.14536	6.63687	13.2508	NaN	NaN
80	0.1	beta	2	0.411303	0.32378	0.390435	0.800813	NaN	NaN	8.82649	8.04144	6.31188	12.6468	NaN	NaN
90	0.1	beta	2	0.177806	0.19085	0.19823	0.409001	NaN	NaN	8.28232	7.36989	5.71131	11.8406	NaN	NaN
100	0.1	beta	2	0.117265	-0.2408	0.697045	0.815235	NaN	NaN	8.08325	7.12903	5.95689	11.8694	NaN	NaN
5	0.2	beta	2	0.854782	1.27861	7.15282	3.43009	NaN	NaN	37.9265	35.6168	43.6595	55.7893	NaN	NaN
10	0.2	beta	2	1.16033	1.08289	3.23956	3.34703	NaN	NaN	24.6199	23.9013	21.0814	35.3674	NaN	NaN
20	0.2	beta	2	-0.000804516	-0.17858	1.48594	1.2593	NaN	NaN	17.588	16.2752	13.677	25.622	NaN	NaN
30	0.2	beta	2	-0.345443	-0.396	0.88536	0.390076	NaN	NaN	14.2772	13.301	11.0247	20.6107	NaN	NaN
40	0.2	beta	2	0.162462	-0.05887	0.92523	0.969781	NaN	NaN	12.3374	11.6386	9.51199	17.7367	NaN	NaN
50	0.2	beta	2	0.00109083	-0.33552	0.943575	0.866473	NaN	NaN	11.1743	10.3342	8.5333	16.1993	NaN	NaN
60	0.2	beta	2	0.331093	0.29504	0.40549	0.722279	NaN	NaN	10.4158	9.58016	7.54912	14.8826	NaN	NaN
70	0.2	beta	2	-0.307528	-0.09837	0.032655	-0.316907	NaN	NaN	9.14	8.70431	7.18994	13.1552	NaN	NaN
80	0.2	beta	2	0.343739	0.20535	0.4887	0.786407	NaN	NaN	8.73177	8.19069	6.70904	12.5925	NaN	NaN
90	0.2	beta	2	-0.370585	-0.26662	0.087965	-0.298842	NaN	NaN	8.19403	7.64702	6.39928	11.9189	NaN	NaN
100	0.2	beta	2	0.22287	0.11984	0.371725	0.568942	NaN	NaN	7.89388	7.36792	5.90282	11.3382	NaN	NaN
5	0.3	beta	2	-0.578864	0.048497	10.2644	0.959613	NaN	NaN	36.4709	36.2118	63.9511	54.1275	NaN	NaN
10	0.3	beta	2	-0.97778	-0.53225	3.05277	0.0705758	NaN	NaN	24.7587	23.6128	32.0036	37.0112	NaN	NaN
20	0.3	beta	2	-0.288378	-0.56085	1.7298	0.986384	NaN	NaN	18.0179	17.1842	15.103	26.187	NaN	NaN
30	0.3	beta	2	-0.283313	-0.60226	1.24811	0.706309	NaN	NaN	14.2944	13.4044	12.465	21.6377	NaN	NaN
40	0.3	beta	2	0.00783857	-0.06639	0.69528	0.583095	NaN	NaN	12.4882	11.7664	9.89326	18.1566	NaN	NaN
50	0.3	beta	2	-0.1025	-0.16113	0.533685	0.336862	NaN	NaN	10.9395	10.2943	9.04959	16.2236	NaN	NaN
60	0.3	beta	2	-0.35963	-0.28619	0.278415	-0.161625	NaN	NaN	9.98563	9.50373	8.21653	14.6745	NaN	NaN
70	0.3	beta	2	-0.281441	-0.16896	0.14178	-0.198566	NaN	NaN	9.46412	8.91828	7.91197	14.0972	NaN	NaN
80	0.3	beta	2	0.225158	0.16132	0.37788	0.537555	NaN	NaN	9.32949	8.90819	7.14285	13.3118	NaN	NaN
90	0.3	beta	2	0.403226	0.39765	0.28047	0.600814	NaN	NaN	8.13732	7.95006	6.9193	12.0422	NaN	NaN
100	0.3	beta	2	0.324943	0.18492	0.414695	0.693783	NaN	NaN	7.96084	7.45244	6.51297	11.8436	NaN	NaN
5	0.4	beta	2	0.488719	0.224538	11.1399	3.11068	NaN	NaN	35.1293	35.7668	52.7055	53.3272	NaN	NaN
10	0.4	beta	2	-0.998479	-1.22484	5.40893	0.452225	NaN	NaN	25.3229	26.4162	35.1055	37.1169	NaN	NaN
20	0.4	beta	2	0.015766	-0.76534	2.93853	1.69482	NaN	NaN	17.8294	18.2561	19.421	26.9265	NaN	NaN
30	0.4	beta	2	0.172781	-0.29367	1.63532	1.29604	NaN	NaN	14.3716	14.3286	13.6849	21.5864	NaN	NaN
40	0.4	beta	2	0.403352	0.5412	0.511645	0.576811	NaN	NaN	12.5571	12.7756	11.1799	18.3765	NaN	NaN
50	0.4	beta	2	-0.377538	-0.88582	1.26303	0.583184	NaN	NaN	11.3843	11.2969	10.6035	17.2514	NaN	NaN
60	0.4	beta	2	-0.199603	-0.2491	0.518815	0.122067	NaN	NaN	10.271	10.2551	9.01276	15.0588	NaN	NaN
70	0.4	beta	2	0.121764	0.0211	0.498135	0.444442	NaN	NaN	9.76133	9.68616	8.86821	14.6978	NaN	NaN
80	0.4	beta	2	0.0303074	-0.22186	0.72115	0.542982	NaN	NaN	8.69456	9.02437	8.31448	13.0219	NaN	NaN
90	0.4	beta	2	-0.611884	-0.56182	0.19384	-0.517699	NaN	NaN	8.32574	8.19452	7.38216	12.4491	NaN	NaN
100	0.4	beta	2	0.177295	0.18258	0.24603	0.307941	NaN	NaN	8.07479	8.1323	7.19598	11.9573	NaN	NaN
5	0.5	beta	2	1.22197	1.82278	14.2101	0.973366	NaN	NaN	34.9969	38.5309	74.5333	51.7427	NaN	NaN
10	0.5	beta	2	-2.03825	-1.91031	6.33895	-1.75203	NaN	NaN	25.1901	28.6562	40.1985	36.3261	NaN	NaN
20	0.5	beta	2	-1.29941	-1.40128	2.32457	-0.893289	NaN	NaN	17.5664	19.4149	22.8323	26.8167	NaN	NaN
30	0.5	beta	2	-0.448735	-0.5323	1.5311	-0.0648665	NaN	NaN	13.9633	16.2722	15.7467	20.4111	NaN	NaN
40	0.5	beta	2	-0.305043	-0.56646	1.20048	0.236954	NaN	NaN	12.81	13.7285	13.5126	19.6333	NaN	NaN
50	0.5	beta	2	-0.541103	-0.4003	0.45704	-0.536908	NaN	NaN	11.259	12.2251	11.2707	16.5816	NaN	NaN
60	0.5	beta	2	-0.383106	-0.5621	0.83279	-0.0051766	NaN	NaN	10.0826	11.2301	10.8133	15.2699	NaN	NaN
70	0.5	beta	2	-0.391277	-0.65155	0.823255	0.122185	NaN	NaN	9.67417	10.326	9.33649	14.2281	NaN	NaN
80	0.5	beta	2	0.133207	0.21813	0.30963	0.117439	NaN	NaN	8.58984	9.79262	9.06584	12.9252	NaN	NaN
90	0.5	beta	2	-0.14769	-0.32591	0.68572	0.191772	NaN	NaN	8.47036	9.71684	8.7601	12.2586	NaN	NaN
100	0.5	beta	2	0.0505192	-0.06206	0.490715	0.263156	NaN	NaN	8.18205	9.09245	8.64102	12.476	NaN	NaN
5	0.6	beta	2	3.86768	4.65615	19.1682	0.725428	NaN	NaN	31.5691	39.1564	100.215	47.8155	NaN	NaN
10	0.6	beta	2	-0.225507	-1.01307	10.7327	0.0582401	NaN	NaN	25.8509	31.522	53.9567	38.1406	NaN	NaN
20	0.6	beta	2	-1.01354	-1.65768	3.77647	-0.12109	NaN	NaN	18.7208	22.3363	24.1497	27.229	NaN	NaN
30	0.6	beta	2	-0.70905	-1.0959	2.56695	-0.198	NaN	NaN	15.0185	19.0065	19.0587	21.2516	NaN	NaN
40	0.6	beta	2	0.00309627	-0.38181	1.86837	0.531866	NaN	NaN	12.8974	15.961	15.8709	19.05	NaN	NaN
50	0.6	beta	2	-0.684685	-1.01328	1.55547	-0.273017	NaN	NaN	11.4784	14.6097	14.4103	16.9126	NaN	NaN
60	0.6	beta	2	-0.375556	-0.08904	0.351945	-0.777046	NaN	NaN	10.5569	13.0171	12.3377	15.594	NaN	NaN
70	0.6	beta	2	-0.29172	-0.24108	0.55585	-0.329922	NaN	NaN	9.64451	11.6973	10.9637	14.2878	NaN	NaN
80	0.6	beta	2	0.238292	0.23562	0.538325	0.27283	NaN	NaN	9.35453	11.2153	10.1647	13.659	NaN	NaN
90	0.6	beta	2	-0.0657653	-0.12674	0.562675	0.0186821	NaN	NaN	8.48106	10.3522	10.0116	12.948	NaN	NaN
100	0.6	beta	2	-0.077444	-0.26021	0.69536	0.182818	NaN	NaN	8.26612	10.0134	9.31934	12.3529	NaN	NaN
5	0.7	beta	2	10.1411	12.5412	12.6745	4.79192	NaN	NaN	30.4906	41.0129	69.8516	48.0927	NaN	NaN
10	0.7	beta	2	3.56426	4.20858	12.6977	0.472548	NaN	NaN	27.9793	36.8483	77.7377	39.2512	NaN	NaN
20	0.7	beta	2	-0.497723	-0.06843	5.47218	-2.04613	NaN	NaN	20.1345	27.4979	43.1576	27.221	NaN	NaN
30	0.7	beta	2	-0.750409	-0.83155	3.31215	-1.11711	NaN	NaN	16.4933	22.8699	24.8436	21.8771	NaN	NaN
40	0.7	beta	2	-0.283329	-0.46662	2.15708	-0.367217	NaN	NaN	13.7822	19.0269	18.9782	19.4888	NaN	NaN
50	0.7	beta	2	-0.51751	-0.38965	1.24584	-0.925107	NaN	NaN	12.6041	17.2514	15.9759	17.2053	NaN	NaN
60	0.7	beta	2	-0.640094	-1.34431	2.43225	0.0953842	NaN	NaN	11.926	16.5534	15.7159	16.0324	NaN	NaN
70	0.7	beta	2	-0.531414	-0.41785	0.897285	-0.883846	NaN	NaN	10.3477	14.6169	13.8802	14.4468	NaN	NaN
80	0.7	beta	2	-0.865742	-0.83095	0.879105	-1.0645	NaN	NaN	9.88471	13.9175	12.6486	13.349	NaN	NaN
90	0.7	beta	2	-0.0757453	0.08307	0.554285	-0.424998	NaN	NaN	9.59809	13.2264	11.7082	12.9638	NaN	NaN
100	0.7	beta	2	0.727928	0.49426	0.99114	0.97296	NaN	NaN	9.09436	12.2308	10.5547	12.3118	NaN	NaN
5	0.8	beta	2	26.193	33.0605	8.02794	11.4804	NaN	NaN	37.8078	56.4973	74.223	46.6381	NaN	NaN
10	0.8	beta	2	8.65265	12.2942	12.6362	-0.652432	NaN	NaN	30.4696	46.1361	73.1843	35.9024	NaN	NaN
20	0.8	beta	2	2.23219	3.76304	8.33981	-2.41072	NaN	NaN	24.0794	36.8178	51.0555	27.3401	NaN	NaN
30	0.8	beta	2	-0.579981	-0.192972	6.91232	-2.78851	NaN	NaN	20.7486	31.6858	41.3477	22.8022	NaN	NaN
40	0.8	beta	2	0.39316	1.36882	2.77075	-1.96779	NaN	NaN	17.7663	26.7282	27.2836	19.5927	NaN	NaN
50	0.8	beta	2	-0.0115474	-0.26941	3.52604	-0.419456	NaN	NaN	15.4879	23.3939	23.309	17.7999	NaN	NaN
60	0.8	beta	2	-0.0956346	0.03195	2.59366	-0.961686	NaN	NaN	14.6504	22.5112	21.872	15.9297	NaN	NaN
70	0.8	beta	2	-0.614141	-0.87633	2.4875	-0.827926	NaN	NaN	13.0384	20.3154	18.1268	14.6839	NaN	NaN
80	0.8	beta	2	-0.287056	-0.50347	2.38809	-0.475012	NaN	NaN	12.7844	19.8209	17.4267	13.2832	NaN	NaN
90	0.8	beta	2	-0.262724	-0.47812	1.83736	-0.338073	NaN	NaN	11.4221	17.5901	14.973	12.7152	NaN	NaN
100	0.8	beta	2	-0.340897	-0.36003	1.40786	-0.672942	NaN	NaN	10.8405	17.0644	13.9914	11.7193	NaN	NaN
5	0.9	beta	2	59.1171	72.0886	1.66207	33.2017	NaN	NaN	64.542	90.6103	65.4403	58.0492	NaN	NaN
10	0.9	beta	2	34.8782	45.2052	8.09501	10.8628	NaN	NaN	49.4551	76.3541	85.2572	35.1009	NaN	NaN
20	0.9	beta	2	15.9426	22.7374	10.9199	-0.225218	NaN	NaN	38.6012	61.571	80.4167	24.9837	NaN	NaN
30	0.9	beta	2	8.51465	13.2231	13.6954	-2.82558	NaN	NaN	33.6775	52.6913	88.9711	23.7487	NaN	NaN
40	0.9	beta	2	5.44305	9.7674	7.69537	-4.27402	NaN	NaN	30.2377	47.1924	60.8547	20.9247	NaN	NaN
50	0.9	beta	2	4.46017	8.12226	5.30164	-3.57654	NaN	NaN	27.6855	43.1237	46.1518	19.4444	NaN	NaN
60	0.9	beta	2	3.42146	5.38675	4.6742	-1.71222	NaN	NaN	23.7094	38.1355	36.6693	17.4214	NaN	NaN
70	0.9	beta	2	1.96352	3.97202	5.50619	-2.70246	NaN	NaN	22.1808	35.1688	56.0843	15.5282	NaN	NaN
80	0.9	beta	2	1.36571	3.33128	3.72483	-3.05069	NaN	NaN	21.5705	34.0617	32.2884	14.7594	NaN	NaN
90	0.9	beta	2	2.3953	4.10475	2.61193	-1.58897	NaN	NaN	19.8393	32.1286	27.4779	13.666	NaN	NaN
100	0.9	beta	2	0.977248	2.15991	2.82064	-1.98421	NaN	NaN	18.4993	29.7489	25.4934	12.9423	NaN	NaN
5	0.1	beta	3	3.0324	7.22444	6.76446	0.214892	NaN	NaN	71.8013	59.1959	52.8577	81.58	NaN	NaN
10	0.1	beta	3	0.417508	2.59047	1.7816	-0.330517	NaN	NaN	47.4464	39.161	29.4738	55.7094	NaN	NaN
20	0.1	beta	3	0.15502	0.86045	0.346087	0.0604218	NaN	NaN	34.5825	26.1547	20.0017	42.0303	NaN	NaN
30	0.1	beta	3	-0.561069	-0.11654	0.306547	-0.621349	NaN	NaN	27.3598	20.5659	16.5552	33.6312	NaN	NaN
40	0.1	beta	3	-0.208078	0.08189	0.15651	-0.372505	NaN	NaN	24.8489	18.0155	15.5463	30.7407	NaN	NaN
50	0.1	beta	3	-0.614726	-0.53831	0.29289	-0.59771	NaN	NaN	21.273	15.5715	13.3906	26.5715	NaN	NaN
60	0.1	beta	3	-0.561999	-0.70036	0.3389	-0.45163	NaN	NaN	19.8119	14.4306	12.4697	24.7693	NaN	NaN
70	0.1	beta	3	0.198149	-0.12382	0.543253	0.397663	NaN	NaN	17.856	13.0795	11.4633	22.4624	NaN	NaN
80	0.1	beta	3	0.572611	0.38299	0.396363	0.705272	NaN	NaN	16.9594	12.612	10.6777	21.2428	NaN	NaN
90	0.1	beta	3	0.0283776	0.55465	-0.35869	-0.180882	NaN	NaN	16.237	11.7824	9.74837	20.2478	NaN	NaN
100	0.1	beta	3	0.474381	-0.24214	0.763873	0.829833	NaN	NaN	15.7697	11.2375	10.1459	19.9148	NaN	NaN
5	0.2	beta	3	2.98432	5.73626	10.1102	-1.57824	NaN	NaN	85.7154	61.3701	71.4466	83.1606	NaN	NaN
10	0.2	beta	3	1.72472	3.45538	2.97866	1.06958	NaN	NaN	46.5459	39.3195	31.4256	54.864	NaN	NaN
20	0.2	beta	3	0.989995	0.93486	1.48004	1.05433	NaN	NaN	34.3203	25.4748	21.653	42.0779	NaN	NaN
30	0.2	beta	3	-0.246772	0.02412	0.56417	-0.3366	NaN	NaN	28.1304	21.1805	17.6359	34.8397	NaN	NaN
40	0.2	beta	3	0.232019	0.15472	0.68896	0.305575	NaN	NaN	23.7463	18.1885	15.3677	29.4985	NaN	NaN
50	0.2	beta	3	0.205751	-0.25822	0.863127	0.42263	NaN	NaN	21.9764	16.5048	14.175	27.2532	NaN	NaN
60	0.2	beta	3	0.669217	0.85766	0.14345	0.601974	NaN	NaN	19.9629	14.9411	12.4504	24.849	NaN	NaN
70	0.2	beta	3	-0.634776	0.30702	-0.540453	-1.06635	NaN	NaN	17.6199	13.7926	11.5995	22.0068	NaN	NaN
80	0.2	beta	3	0.73594	0.6147	0.41903	0.82613	NaN	NaN	16.857	13.2219	10.9714	21.017	NaN	NaN
90	0.2	beta	3	-0.396668	-0.11571	-0.0538533	-0.534939	NaN	NaN	15.9043	12.039	10.7055	20.1199	NaN	NaN
100	0.2	beta	3	0.611223	0.33362	0.424107	0.752996	NaN	NaN	15.8624	11.7841	9.97716	19.8384	NaN	NaN
5	0.3	beta	3	0.0948756	4.65326	14.6017	-4.82708	NaN	NaN	71.7202	60.4782	107.206	79.8123	NaN	NaN
10	0.3	beta	3	-1.84648	0.39025	4.06326	-3.65758	NaN	NaN	49.0734	38.1925	59.1267	58.4259	NaN	NaN
20	0.3	beta	3	0.769963	-0.27394	2.68264	0.958303	NaN	NaN	36.3148	27.3676	25.0508	43.8938	NaN	NaN
30	0.3	beta	3	0.0786548	-0.49285	1.52111	0.158382	NaN	NaN	27.888	21.0008	20.1152	35.0559	NaN	NaN
40	0.3	beta	3	0.292737	0.46836	0.584407	0.139665	NaN	NaN	24.1216	19.033	16.4398	29.9025	NaN	NaN
50	0.3	beta	3	0.843757	0.27443	0.962303	1.02565	NaN	NaN	21.842	16.3187	15.2747	27.7101	NaN	NaN
60	0.3	beta	3	-0.338827	-0.11509	0.21042	-0.507794	NaN	NaN	20.0854	15.4022	13.56	25.1665	NaN	NaN
70	0.3	beta	3	-0.61978	-0.35285	0.131793	-0.828378	NaN	NaN	18.0423	14.1645	13.0875	22.9548	NaN	NaN
80	0.3	beta	3	0.357972	0.1982	0.408377	0.368289	NaN	NaN	17.8851	13.8265	12.3021	22.5824	NaN	NaN
90	0.3	beta	3	0.637786	0.76304	0.227187	0.53544	NaN	NaN	15.6661	12.6389	11.2948	19.9945	NaN	NaN
100	0.3	beta	3	0.468918	0.39314	0.225607	0.428395	NaN	NaN	16.5197	11.9459	11.1422	20.8154	NaN	NaN
5	0.4	beta	3	2.48659	5.15662	16.0151	-2.23236	NaN	NaN	69.3139	59.626	81.5711	78.6678	NaN	NaN
10	0.4	beta	3	-0.500258	1.59038	5.93537	-2.97115	NaN	NaN	47.1059	40.7685	51.2342	56.639	NaN	NaN
20	0.4	beta	3	-0.829585	0.07579	1.8721	-1.82977	NaN	NaN	32.6888	27.8764	29.2893	40.3718	NaN	NaN
30	0.4	beta	3	0.783838	0.36244	1.80724	0.656218	NaN	NaN	27.3605	22.6354	21.7532	34.2415	NaN	NaN
40	0.4	beta	3	0.579497	1.46254	0.23086	0.0175837	NaN	NaN	23.4442	20.0709	17.1923	29.3823	NaN	NaN
50	0.4	beta	3	-0.103192	-0.92389	1.36871	0.0436027	NaN	NaN	22.8318	17.7994	16.9943	28.9258	NaN	NaN
60	0.4	beta	3	-0.70787	-0.24149	0.198463	-1.01966	NaN	NaN	19.1576	15.9578	14.117	24.0967	NaN	NaN
70	0.4	beta	3	0.540885	0.45707	0.435967	0.390031	NaN	NaN	19.7261	15.4365	14.4429	25.1055	NaN	NaN
80	0.4	beta	3	0.282477	0.21683	0.565693	0.183839	NaN	NaN	16.7171	14.4079	13.2227	21.2588	NaN	NaN
90	0.4	beta	3	-0.928307	-0.6963	0.12636	-1.14948	NaN	NaN	16.034	12.986	12.2902	20.4963	NaN	NaN
100	0.4	beta	3	0.63276	0.55364	0.37951	0.582624	NaN	NaN	15.6958	12.9382	11.6883	20.0055	NaN	NaN
5	0.5	beta	3	1.55802	7.98678	23.585	-7.29599	NaN	NaN	66.764	61.812	133.919	76.3405	NaN	NaN
10	0.5	beta	3	-1.81396	0.96885	9.18539	-5.75081	NaN	NaN	46.531	44.5069	63.4426	54.5478	NaN	NaN
20	0.5	beta	3	-0.78709	-0.96828	4.12013	-1.98272	NaN	NaN	33.8932	30.0639	37.3237	42.0871	NaN	NaN
30	0.5	beta	3	-0.583902	0.32677	1.93342	-1.62815	NaN	NaN	25.1146	26.0866	24.4053	31.3557	NaN	NaN
40	0.5	beta	3	-0.218989	-0.05059	1.16925	-0.839803	NaN	NaN	25.0322	21.7244	21.1569	31.861	NaN	NaN
50	0.5	beta	3	-1.12014	-0.27554	0.321483	-1.8412	NaN	NaN	20.8151	19.0622	17.6701	26.5003	NaN	NaN
60	0.5	beta	3	-0.406502	-0.07966	0.736383	-0.941893	NaN	NaN	18.9468	17.9614	17.5244	24.4146	NaN	NaN
70	0.5	beta	3	-0.0430158	-0.26496	0.874973	-0.112742	NaN	NaN	18.1938	16.1596	14.6241	23.1176	NaN	NaN
80	0.5	beta	3	0.207906	0.48701	0.459127	-0.154413	NaN	NaN	16.3561	15.5033	14.3988	21.2336	NaN	NaN
90	0.5	beta	3	-0.126026	-0.03449	0.666737	-0.341803	NaN	NaN	15.5963	15.4057	13.4354	19.7087	NaN	NaN
100	0.5	beta	3	0.261995	0.19328	0.59887	0.0779581	NaN	NaN	15.3492	14.0807	13.3931	19.9659	NaN	NaN
5	0.6	beta	3	6.36205	13.1988	37.1985	-7.65228	NaN	NaN	59.8209	61.8863	193.794	67.7074	NaN	NaN
10	0.6	beta	3	0.487948	2.03411	17.4563	-5.64491	NaN	NaN	48.1738	47.399	92.6975	56.2324	NaN	NaN
20	0.6	beta	3	-0.456123	0.06747	4.75188	-2.51931	NaN	NaN	34.8695	33.9156	37.705	42.7513	NaN	NaN
30	0.6	beta	3	-0.705174	-0.08363	3.23642	-2.06505	NaN	NaN	27.0119	29.053	29.2072	33.8617	NaN	NaN
40	0.6	beta	3	-0.0707331	0.14296	2.40181	-1.00105	NaN	NaN	22.9115	24.4499	24.5468	29.4814	NaN	NaN
50	0.6	beta	3	-0.58778	-0.76153	2.23187	-1.18715	NaN	NaN	20.9409	22.5406	21.998	26.9076	NaN	NaN
60	0.6	beta	3	-0.333998	0.4863	0.63376	-1.27021	NaN	NaN	19.4212	20.0075	19.1366	25.2947	NaN	NaN
70	0.6	beta	3	-0.316902	0.29278	0.681287	-1.06159	NaN	NaN	17.9241	18.5659	17.5719	23.2124	NaN	NaN
80	0.6	beta	3	0.385355	0.90322	0.64703	-0.23399	NaN	NaN	16.7623	18.0728	16.188	21.4994	NaN	NaN
90	0.6	beta	3	-0.280669	0.09826	0.535453	-0.85832	NaN	NaN	16.011	16.2423	15.9819	21.1715	NaN	NaN
100	0.6	beta	3	0.391618	0.43468	0.74619	0.0465752	NaN	NaN	15.5027	15.7262	14.743	20.25	NaN	NaN
5	0.7	beta	3	15.9901	29.4566	19.3595	-1.23949	NaN	NaN	63.1391	70.3885	112.275	67.5857	NaN	NaN
10	0.7	beta	3	7.15223	13.0396	25.1665	-3.08795	NaN	NaN	50.719	57.4059	158.636	59.0727	NaN	NaN
20	0.7	beta	3	-0.240641	3.04643	9.85607	-5.21034	NaN	NaN	34.2896	41.8693	80.6139	42.5183	NaN	NaN
30	0.7	beta	3	-0.791919	0.41979	5.71242	-3.52491	NaN	NaN	27.8883	34.7121	40.2031	33.9453	NaN	NaN
40	0.7	beta	3	0.181638	0.53054	3.7412	-1.51569	NaN	NaN	24.8525	29.6712	30.3423	31.6272	NaN	NaN
50	0.7	beta	3	-0.485667	1.17176	1.50655	-2.42536	NaN	NaN	21.4188	26.5881	25.2343	27.3455	NaN	NaN
60	0.7	beta	3	0.0977693	-0.6196	3.62721	-0.545817	NaN	NaN	20.182	25.1956	24.7183	25.5625	NaN	NaN
70	0.7	beta	3	-0.674049	0.39413	1.30549	-1.97986	NaN	NaN	17.3846	22.6481	21.4887	22.6246	NaN	NaN
80	0.7	beta	3	-0.926333	-0.26402	1.20312	-1.94939	NaN	NaN	16.7772	20.9946	19.6744	21.8223	NaN	NaN
90	0.7	beta	3	0.191723	0.86022	1.07307	-0.754986	NaN	NaN	16.518	20.7151	18.6503	21.2134	NaN	NaN
100	0.7	beta	3	1.37635	1.40308	1.42932	0.873924	NaN	NaN	15.6314	19.6272	16.8429	19.9478	NaN	NaN
5	0.8	beta	3	36.4379	65.5885	14.4975	6.10657	NaN	NaN	65.7853	102.507	124.348	63.1546	NaN	NaN
10	0.8	beta	3	13.3235	30.2888	22.0278	-5.2441	NaN	NaN	48.12	75.5008	120.829	55.816	NaN	NaN
20	0.8	beta	3	4.55919	12.9	14.9879	-5.54417	NaN	NaN	34.1171	56.6455	89.3852	40.8463	NaN	NaN
30	0.8	beta	3	0.327245	4.77424	15.6635	-6.15648	NaN	NaN	28.843	48.1653	113.158	34.6965	NaN	NaN
40	0.8	beta	3	1.22593	6.55718	4.45951	-4.24129	NaN	NaN	25.8044	41.3976	45.8498	31.1072	NaN	NaN
50	0.8	beta	3	1.00261	2.22866	6.2138	-1.78692	NaN	NaN	23.4175	36.1726	38.6032	28.2678	NaN	NaN
60	0.8	beta	3	0.741212	2.47237	4.83862	-2.03154	NaN	NaN	21.5678	34.713	37.8833	25.6795	NaN	NaN
70	0.8	beta	3	-0.717676	0.17151	4.09633	-2.75393	NaN	NaN	19.0937	31.3399	29.2717	23.4369	NaN	NaN
80	0.8	beta	3	-0.072166	0.44336	4.41718	-1.67904	NaN	NaN	17.994	30.5015	28.3318	21.1873	NaN	NaN
90	0.8	beta	3	-0.211261	0.01993	3.37971	-1.3768	NaN	NaN	16.5153	27.2909	23.6507	19.7565	NaN	NaN
100	0.8	beta	3	0.0623952	0.4444	3.05005	-1.15095	NaN	NaN	15.6127	27.1553	22.5789	18.7371	NaN	NaN
5	0.9	beta	3	92.286	147.208	5.93317	40.7823	NaN	NaN	105.66	184.216	108.877	77.9619	NaN	NaN
10	0.9	beta	3	53.3868	95.9791	21.6278	10.0362	NaN	NaN	75.0325	149.659	164.496	53.2508	NaN	NaN
20	0.9	beta	3	24.5048	53.9362	25.1266	-3.91818	NaN	NaN	50.7331	113.864	162.5	38.1305	NaN	NaN
30	0.9	beta	3	13.222	33.8901	23.6789	-6.101	NaN	NaN	40.9968	90.52	164.571	35.3362	NaN	NaN
40	0.9	beta	3	8.39238	24.847	20.7783	-7.4175	NaN	NaN	37.0625	80.3882	133.228	32.8457	NaN	NaN
50	0.9	beta	3	6.22038	20.8331	14.471	-7.15845	NaN	NaN	33.074	72.8531	107.4	30.0582	NaN	NaN
60	0.9	beta	3	5.42055	14.4019	10.7367	-4.18184	NaN	NaN	29.2066	63.5849	68.0222	27.1533	NaN	NaN
70	0.9	beta	3	3.80377	12.9428	12.6066	-4.63934	NaN	NaN	25.7587	57.0497	132.222	23.7638	NaN	NaN
80	0.9	beta	3	2.33251	10.7892	7.61181	-5.28149	NaN	NaN	24.7487	53.8207	58.0836	22.9133	NaN	NaN
90	0.9	beta	3	3.79942	11.1192	5.37453	-3.21699	NaN	NaN	23.2584	51.8269	46.3995	21.9957	NaN	NaN
100	0.9	beta	3	2.00667	8.32797	5.34548	-3.98908	NaN	NaN	21.7073	47.438	45.1727	20.2534	NaN	NaN
5	0.1	beta	4	3.73238	13.2223	5.28676	-6.15552	NaN	NaN	107.986	81.7286	64.1877	97.3622	NaN	NaN
10	0.1	beta	4	1.30483	5.50828	0.70407	-3.01222	NaN	NaN	71.0905	52.4997	35.9206	67.7277	NaN	NaN
20	0.1	beta	4	0.719791	1.57586	-0.405703	-1.14961	NaN	NaN	52.192	33.2263	24.9534	54.0451	NaN	NaN
30	0.1	beta	4	-1.47918	0.22114	-1.05349	-3.01045	NaN	NaN	40.6406	26.2966	20.9832	42.8913	NaN	NaN
40	0.1	beta	4	-0.711877	-0.0594	-0.622635	-2.09432	NaN	NaN	39.1121	22.8672	19.659	39.6837	NaN	NaN
50	0.1	beta	4	-1.04152	-0.49174	-0.395908	-1.95541	NaN	NaN	30.9761	19.4734	17.123	33.4084	NaN	NaN
60	0.1	beta	4	-0.344441	-0.25878	-0.260425	-1.12181	NaN	NaN	29.8344	18.365	16.3976	32.2105	NaN	NaN
70	0.1	beta	4	0.397193	-0.11019	0.24319	-0.183463	NaN	NaN	27.5416	16.6758	15.2201	29.6704	NaN	NaN
80	0.1	beta	4	0.58953	0.37078	-0.019715	0.0109235	NaN	NaN	26.6969	15.98	14.4019	28.8234	NaN	NaN
90	0.1	beta	4	0.130012	0.75511	-0.738313	-0.496535	NaN	NaN	25.517	14.8875	13.234	27.5988	NaN	NaN
100	0.1	beta	4	0.953584	0.04055	0.423903	0.538447	NaN	NaN	24.8752	14.2065	13.6594	26.6952	NaN	NaN
5	0.2	beta	4	5.3433	10.3346	11.1321	-9.13179	NaN	NaN	161.418	85.3004	91.4806	96.2403	NaN	NaN
10	0.2	beta	4	0.964046	5.07838	1.60482	-3.46942	NaN	NaN	70.0289	50.8955	37.8961	67.8881	NaN	NaN
20	0.2	beta	4	0.282188	1.09719	0.043465	-2.05957	NaN	NaN	54.0544	32.8711	26.8173	54.2693	NaN	NaN
30	0.2	beta	4	0.447643	1.01293	-0.230497	-1.14174	NaN	NaN	43.7148	27.0853	22.4508	46.0678	NaN	NaN
40	0.2	beta	4	0.55875	0.42222	0.14008	-0.634704	NaN	NaN	37.4406	23.2119	20.0496	39.2458	NaN	NaN
50	0.2	beta	4	0.80524	0.01696	0.345162	-0.230488	NaN	NaN	36.3407	20.8875	18.9027	37.3628	NaN	NaN
60	0.2	beta	4	0.802815	1.19896	-0.511585	-0.168464	NaN	NaN	32.5218	18.9306	16.6629	33.8844	NaN	NaN
70	0.2	beta	4	-1.41297	0.67241	-1.41824	-2.36216	NaN	NaN	25.4018	17.2514	14.7915	27.9342	NaN	NaN
80	0.2	beta	4	1.42272	1.23608	0.112315	0.83932	NaN	NaN	26.4461	16.9484	14.6028	28.6474	NaN	NaN
90	0.2	beta	4	-0.960976	0.19824	-0.919092	-1.78312	NaN	NaN	24.2093	15.1352	14.427	26.5696	NaN	NaN
100	0.2	beta	4	1.28184	0.63231	0.267263	0.804215	NaN	NaN	26.3427	14.975	13.5269	27.7052	NaN	NaN
5	0.3	beta	4	4.01653	10.9992	19.5732	-8.99476	NaN	NaN	121.148	83.9877	148.643	96.7869	NaN	NaN
10	0.3	beta	4	-1.05276	2.42082	3.76722	-6.9692	NaN	NaN	79.9319	50.1341	80.0882	74.8966	NaN	NaN
20	0.3	beta	4	2.31016	0.4195	2.28233	-0.548824	NaN	NaN	60.1278	34.1504	31.573	56.4783	NaN	NaN
30	0.3	beta	4	-0.255771	-0.51019	0.644528	-2.13517	NaN	NaN	43.3235	25.8532	25.0354	44.3942	NaN	NaN
40	0.3	beta	4	0.166751	1.55541	-0.624145	-1.41451	NaN	NaN	36.8862	23.9171	20.7013	38.277	NaN	NaN
50	0.3	beta	4	0.922001	0.17717	0.604228	-0.173705	NaN	NaN	33.723	20.4814	19.7643	35.5776	NaN	NaN
60	0.3	beta	4	0.0512721	0.33906	-0.27203	-1.07446	NaN	NaN	33.8354	19.4054	17.8067	34.7975	NaN	NaN
70	0.3	beta	4	-0.52918	-0.24798	-0.21841	-1.50809	NaN	NaN	28.5542	17.6149	17.2725	30.7388	NaN	NaN
80	0.3	beta	4	0.871856	0.62668	0.04374	0.096158	NaN	NaN	28.0059	17.7166	16.2628	30.2779	NaN	NaN
90	0.3	beta	4	1.06562	1.10541	-0.00591	0.397931	NaN	NaN	24.817	15.9671	14.7439	27.1214	NaN	NaN
100	0.3	beta	4	0.663709	0.58902	-0.248723	-0.174069	NaN	NaN	30.1999	15.0206	15.1148	29.3224	NaN	NaN
5	0.4	beta	4	1.66906	9.642	20.2925	-10.8332	NaN	NaN	96.8167	82.9492	107.651	89.8647	NaN	NaN
10	0.4	beta	4	-2.18515	3.90436	4.80086	-8.94851	NaN	NaN	68.3659	52.3186	62.7926	67.0601	NaN	NaN
20	0.4	beta	4	0.725999	2.2203	1.41611	-2.62272	NaN	NaN	51.6619	35.7179	36.4634	52.3152	NaN	NaN
30	0.4	beta	4	1.02572	0.57738	1.45819	-1.02287	NaN	NaN	41.5406	28.6974	27.1242	43.4386	NaN	NaN
40	0.4	beta	4	0.678491	2.16227	-0.265955	-1.05852	NaN	NaN	37.1356	26.1124	22.0339	39.1636	NaN	NaN
50	0.4	beta	4	0.718027	-0.90006	1.21185	-0.658821	NaN	NaN	38.1676	22.9046	22.248	39.4394	NaN	NaN
60	0.4	beta	4	-1.47975	0.14851	-0.726785	-2.69678	NaN	NaN	28.3912	20.3823	18.0571	30.9437	NaN	NaN
70	0.4	beta	4	0.734224	0.76427	-0.178072	-0.460709	NaN	NaN	31.9527	19.5253	18.79	33.9107	NaN	NaN
80	0.4	beta	4	-0.411375	0.17217	-0.135768	-1.40986	NaN	NaN	25.522	17.8424	17.0362	27.5094	NaN	NaN
90	0.4	beta	4	-1.08797	-0.40463	-0.327485	-2.03106	NaN	NaN	25.1739	16.8578	16.2211	26.8229	NaN	NaN
100	0.4	beta	4	1.10007	0.94361	0.14617	0.412175	NaN	NaN	24.3449	16.1879	15.3321	26.6829	NaN	NaN
5	0.5	beta	4	3.12093	14.672	33.3224	-13.9797	NaN	NaN	106.605	80.9233	224.326	94.5753	NaN	NaN
10	0.5	beta	4	-1.99943	4.9275	9.33315	-10.746	NaN	NaN	69.5321	58.3766	74.3177	65.8576	NaN	NaN
20	0.5	beta	4	-1.53359	-1.0341	3.75815	-5.84331	NaN	NaN	51.9058	37.1856	46.5889	51.9259	NaN	NaN
30	0.5	beta	4	-1.06974	1.61594	1.20203	-4.07192	NaN	NaN	38.3718	33.2485	30.2306	39.9336	NaN	NaN
40	0.5	beta	4	-0.409799	0.96148	0.100667	-2.65276	NaN	NaN	37.8277	27.2015	25.4382	40.2669	NaN	NaN
50	0.5	beta	4	-1.327	0.24225	-0.140615	-3.1371	NaN	NaN	32.1159	23.9952	22.3358	34.4486	NaN	NaN
60	0.5	beta	4	-0.713308	-0.11511	0.514672	-2.31578	NaN	NaN	29.6649	22.5913	21.9485	31.5073	NaN	NaN
70	0.5	beta	4	0.113294	0.51745	0.21082	-0.959551	NaN	NaN	27.9198	20.6672	18.2266	30.344	NaN	NaN
80	0.5	beta	4	0.636893	1.08921	0.27757	-0.472386	NaN	NaN	25.3448	19.5956	18.2302	27.8629	NaN	NaN
90	0.5	beta	4	0.0214029	0.13253	0.499657	-0.944786	NaN	NaN	24.7597	18.9946	17.4957	26.8923	NaN	NaN
100	0.5	beta	4	-0.0635032	0.36086	0.112852	-1.04474	NaN	NaN	24.0336	17.8117	16.6934	25.9218	NaN	NaN
5	0.6	beta	4	3.99414	21.3477	41.9132	-17.1064	NaN	NaN	85.0454	81.7313	236.48	76.673	NaN	NaN
10	0.6	beta	4	1.248	5.28109	21.7993	-11.7953	NaN	NaN	74.5487	59.2237	120.336	65.649	NaN	NaN
20	0.6	beta	4	0.114163	2.40923	4.60328	-5.51221	NaN	NaN	56.7652	43.5647	46.112	53.4513	NaN	NaN
30	0.6	beta	4	-0.537574	1.50129	3.36177	-4.03152	NaN	NaN	39.3608	36.6017	35.8435	42.1066	NaN	NaN
40	0.6	beta	4	0.0507671	0.80017	2.31979	-2.81481	NaN	NaN	36.6448	30.4323	30.6391	38.4893	NaN	NaN
50	0.6	beta	4	-0.468635	0.05284	1.70519	-2.8412	NaN	NaN	34.8849	28.1679	27.1739	35.8544	NaN	NaN
60	0.6	beta	4	-0.0114999	1.47787	0.253018	-1.99529	NaN	NaN	29.838	24.8015	23.4635	32.6976	NaN	NaN
70	0.6	beta	4	0.306178	1.16768	0.585075	-1.39207	NaN	NaN	28.3588	23.1072	22.0884	30.4892	NaN	NaN
80	0.6	beta	4	-0.0738205	1.36653	0.273568	-1.66454	NaN	NaN	24.9409	22.9909	20.6782	27.3705	NaN	NaN
90	0.6	beta	4	-0.353117	0.32931	0.363875	-1.8318	NaN	NaN	26.4886	20.6559	20.2635	28.329	NaN	NaN
100	0.6	beta	4	0.822244	0.71981	0.771717	-0.335915	NaN	NaN	24.5288	19.5674	18.9298	26.7617	NaN	NaN
5	0.7	beta	4	18.8899	45.1105	23.2582	-7.87803	NaN	NaN	104.445	99.1281	139.028	78.4782	NaN	NaN
10	0.7	beta	4	10.7417	22.2041	31.0183	-5.79836	NaN	NaN	85.7561	75.2923	218.372	75.9438	NaN	NaN
20	0.7	beta	4	-0.43227	7.60063	11.2663	-8.9515	NaN	NaN	49.3339	52.6838	109.257	50.8918	NaN	NaN
30	0.7	beta	4	-0.457266	2.55019	6.47476	-6.28685	NaN	NaN	44.4198	43.5713	50.2415	42.8455	NaN	NaN
40	0.7	beta	4	-0.242914	1.72076	4.08104	-4.49786	NaN	NaN	37.4307	38.0648	38.146	39.4886	NaN	NaN
50	0.7	beta	4	-0.488837	2.97024	1.3643	-4.06787	NaN	NaN	30.99	33.1992	31.4606	33.1623	NaN	NaN
60	0.7	beta	4	0.513717	0.67614	3.64466	-2.17416	NaN	NaN	30.3902	31.308	31.4202	32.5654	NaN	NaN
70	0.7	beta	4	-1.87649	0.45109	1.26703	-4.4052	NaN	NaN	25.7355	28.3822	27.0908	28.6158	NaN	NaN
80	0.7	beta	4	-0.558503	0.56779	1.41943	-2.77387	NaN	NaN	26.7456	26.3511	25.2885	28.4424	NaN	NaN
90	0.7	beta	4	0.0774574	1.51185	1.028	-1.83626	NaN	NaN	24.3979	25.6008	23.1471	26.8977	NaN	NaN
100	0.7	beta	4	2.18302	1.95759	1.94785	0.783046	NaN	NaN	24.3305	24.9632	21.3049	26.545	NaN	NaN
5	0.8	beta	4	41.6645	97.6212	18.6814	2.07568	NaN	NaN	106.824	147.426	159.238	79.9136	NaN	NaN
10	0.8	beta	4	14.0098	45.7473	33.5532	-10.4141	NaN	NaN	66.1958	102.525	177.496	65.9728	NaN	NaN
20	0.8	beta	4	4.78787	21.6818	19.1097	-9.80109	NaN	NaN	48.3483	73.6577	117.156	50.4611	NaN	NaN
30	0.8	beta	4	0.99254	10.6447	19.7426	-9.32242	NaN	NaN	41.0312	61.2325	164.075	42.7413	NaN	NaN
40	0.8	beta	4	1.05769	10.3113	5.98578	-6.69944	NaN	NaN	38.5587	51.8013	59.4228	39.1042	NaN	NaN
50	0.8	beta	4	1.11147	5.72381	6.13521	-4.40156	NaN	NaN	33.9397	44.9122	47.7727	36.0447	NaN	NaN
60	0.8	beta	4	1.86171	4.23232	7.03313	-2.95425	NaN	NaN	33.2188	43.8017	49.3997	33.5357	NaN	NaN
70	0.8	beta	4	-0.317388	2.421	4.85627	-4.45365	NaN	NaN	27.7896	39.2903	37.1203	29.875	NaN	NaN
80	0.8	beta	4	-0.0955453	2.19667	4.84525	-3.55732	NaN	NaN	25.3899	38.1045	35.1786	27.3665	NaN	NaN
90	0.8	beta	4	-0.313046	1.91558	3.19779	-3.2692	NaN	NaN	24.1896	34.2889	29.645	25.5589	NaN	NaN
100	0.8	beta	4	-0.715327	1.55937	2.88876	-3.47007	NaN	NaN	21.7901	33.7786	27.822	23.9629	NaN	NaN
5	0.9	beta	4	110.026	226.476	8.10006	40.2228	NaN	NaN	142.581	283.144	140.401	88.6808	NaN	NaN
10	0.9	beta	4	61.453	145.758	28.2338	7.78771	NaN	NaN	103.611	221.012	216.628	63.7045	NaN	NaN
20	0.9	beta	4	27.056	84.2919	36.0193	-6.88532	NaN	NaN	61.6635	161.727	237.164	46.7104	NaN	NaN
30	0.9	beta	4	14.2143	56.2444	33.9706	-10.1157	NaN	NaN	46.1832	128.936	244.297	41.4517	NaN	NaN
40	0.9	beta	4	9.38171	41.9068	31.7243	-10.7968	NaN	NaN	44.8633	113.946	196.654	41.2814	NaN	NaN
50	0.9	beta	4	7.29314	33.0731	23.052	-9.19902	NaN	NaN	38.0101	100.42	156.338	37.162	NaN	NaN
60	0.9	beta	4	6.03191	23.5769	14.2688	-7.01662	NaN	NaN	36.5778	85.9234	89.9667	33.9608	NaN	NaN
70	0.9	beta	4	3.75302	22.2541	17.1765	-7.10037	NaN	NaN	29.0577	76.7446	205.748	29.5014	NaN	NaN
80	0.9	beta	4	2.65737	19.0571	9.59083	-6.94054	NaN	NaN	27.8716	70.6968	75.966	28.1211	NaN	NaN
90	0.9	beta	4	3.86437	17.4956	8.377	-5.41071	NaN	NaN	28.7536	68.1041	65.808	27.9913	NaN	NaN
100	0.9	beta	4	2.29013	12.9938	8.13035	-5.40721	NaN	NaN	27.1113	60.8189	59.1867	25.8701	NaN	NaN
5	0.1	beta	5	5.22197	19.7626	3.1257	-11.7425	NaN	NaN	147.566	103.732	70.9017	110.515	NaN	NaN
10	0.1	beta	5	3.60001	8.94038	-0.702932	-5.16173	NaN	NaN	104.648	66.1676	40.615	80.6905	NaN	NaN
20	0.1	beta	5	1.57713	2.06944	-1.28605	-3.06687	NaN	NaN	74.6584	39.269	29.2497	62.8799	NaN	NaN
30	0.1	beta	5	-2.59878	0.35109	-2.61717	-5.67688	NaN	NaN	54.6662	31.2598	24.4943	50.5412	NaN	NaN
40	0.1	beta	5	-1.06742	0.37519	-2.11639	-4.11969	NaN	NaN	56.3565	26.2415	23.0478	46.8539	NaN	NaN
50	0.1	beta	5	-2.52695	-0.43577	-1.98603	-4.61718	NaN	NaN	41.8444	23.0392	20.2902	39.4097	NaN	NaN
60	0.1	beta	5	0.115871	-0.04967	-1.07217	-2.11002	NaN	NaN	47.3041	21.1037	20.1564	40.5142	NaN	NaN
70	0.1	beta	5	0.483375	0.29207	-0.516398	-1.17827	NaN	NaN	37.6422	19.6268	18.0592	35.096	NaN	NaN
80	0.1	beta	5	1.39518	0.70273	-0.41924	-0.192096	NaN	NaN	37.9704	18.557	17.4695	35.38	NaN	NaN
90	0.1	beta	5	-0.203444	0.67761	-1.44896	-1.60436	NaN	NaN	35.9282	17.3291	16.268	33.72	NaN	NaN
100	0.1	beta	5	1.22909	-0.0533	-0.063014	-0.272719	NaN	NaN	35.9045	16.3724	16.9079	32.7443	NaN	NaN
5	0.2	beta	5	13.1795	16.4561	11.554	-14.0619	NaN	NaN	288.405	113.39	105.776	109.564	NaN	NaN
10	0.2	beta	5	-2.41459	6.62618	-1.31359	-10.1103	NaN	NaN	88.694	62.9735	41.8248	74.8921	NaN	NaN
20	0.2	beta	5	-0.214547	2.3264	-1.73019	-4.71879	NaN	NaN	67.3339	38.5164	29.8159	59.9178	NaN	NaN
30	0.2	beta	5	1.00178	0.72331	-0.677262	-2.68891	NaN	NaN	60.5308	30.6954	26.5379	54.1619	NaN	NaN
40	0.2	beta	5	1.08837	1.01331	-0.692056	-1.84825	NaN	NaN	52.7019	27.7244	23.4448	46.3915	NaN	NaN
50	0.2	beta	5	2.10022	-0.04178	-0.093686	-0.920512	NaN	NaN	56.1446	23.952	22.9146	46.3736	NaN	NaN
60	0.2	beta	5	-0.194875	0.98118	-1.58749	-2.21429	NaN	NaN	42.9453	22.2467	19.4902	39.5328	NaN	NaN
70	0.2	beta	5	-2.95309	0.41284	-2.48761	-4.47814	NaN	NaN	33.6414	19.9611	17.7489	33.0156	NaN	NaN
80	0.2	beta	5	1.07941	1.3621	-0.7008	-0.481148	NaN	NaN	36.2127	19.7787	17.5274	34.2388	NaN	NaN
90	0.2	beta	5	-1.55319	0.05816	-1.67373	-3.09535	NaN	NaN	34.1177	17.2944	17.4155	32.4413	NaN	NaN
100	0.2	beta	5	1.25921	0.93886	-0.571302	-0.206549	NaN	NaN	39.4157	17.618	16.1128	34.0188	NaN	NaN
5	0.3	beta	5	0.693981	14.7647	19.8551	-18.0593	NaN	NaN	146.42	101.991	178.036	96.9023	NaN	NaN
10	0.3	beta	5	0.657294	5.03188	3.00535	-10.0007	NaN	NaN	111.626	59.0231	96.3549	83.4146	NaN	NaN
20	0.3	beta	5	4.43536	0.9422	1.68942	-2.78106	NaN	NaN	93.3132	39.8563	36.8803	64.9511	NaN	NaN
30	0.3	beta	5	0.668889	-0.32932	-0.159326	-3.83211	NaN	NaN	65.3124	30.4185	29.2765	53.4801	NaN	NaN
40	0.3	beta	5	-0.260327	2.05319	-2.04053	-3.47471	NaN	NaN	53.7002	27.6074	24.3734	46.2033	NaN	NaN
50	0.3	beta	5	1.38664	0.77131	-0.094644	-1.29963	NaN	NaN	46.0826	24.1258	22.9352	41.2821	NaN	NaN
60	0.3	beta	5	0.935803	1.16374	-0.972726	-1.6799	NaN	NaN	51.9662	22.8101	21.2302	42.6363	NaN	NaN
70	0.3	beta	5	0.318984	0.21247	-0.957048	-2.14825	NaN	NaN	45.3976	20.423	21.3291	39.5978	NaN	NaN
80	0.3	beta	5	1.46526	0.89378	-0.513916	-0.549462	NaN	NaN	39.9637	20.5435	19.8557	36.9319	NaN	NaN
90	0.3	beta	5	1.08088	1.19879	-0.59433	-0.545726	NaN	NaN	35.127	18.8439	17.8332	33.1375	NaN	NaN
100	0.3	beta	5	1.978	0.83418	-0.468346	-0.192575	NaN	NaN	54.2164	17.3571	18.5229	37.5699	NaN	NaN
5	0.4	beta	5	0.999985	14.8938	21.63	-17.9309	NaN	NaN	124.239	104.002	125.287	96.734	NaN	NaN
10	0.4	beta	5	-1.68513	4.05963	6.20942	-13.8327	NaN	NaN	102.296	62.0497	76.0358	78.062	NaN	NaN
20	0.4	beta	5	0.530169	2.94058	-0.15029	-5.48878	NaN	NaN	71.3631	41.3924	40.7564	61.5924	NaN	NaN
30	0.4	beta	5	-0.388019	1.33377	-0.305124	-4.39208	NaN	NaN	51.9801	33.3354	30.0427	48.193	NaN	NaN
40	0.4	beta	5	0.906283	3.45901	-1.40368	-2.43306	NaN	NaN	53.2682	30.9409	25.3596	46.9097	NaN	NaN
50	0.4	beta	5	1.97572	-0.53277	0.41212	-1.73529	NaN	NaN	57.6758	26.5695	26.2978	48.4408	NaN	NaN
60	0.4	beta	5	-1.50993	0.52186	-1.43522	-3.73817	NaN	NaN	39.729	23.6653	21.3997	37.5637	NaN	NaN
70	0.4	beta	5	1.64173	1.10729	-0.590006	-0.849905	NaN	NaN	44.791	22.9125	21.9957	40.8524	NaN	NaN
80	0.4	beta	5	-0.511507	0.46729	-0.70963	-2.45286	NaN	NaN	35.3129	21.165	19.8453	32.5085	NaN	NaN
90	0.4	beta	5	-1.17912	-0.0167	-1.12935	-3.13981	NaN	NaN	38.1945	19.8277	19.4988	33.2438	NaN	NaN
100	0.4	beta	5	1.29302	1.44914	-0.580392	-0.401756	NaN	NaN	34.7219	19.0018	18.4393	32.396	NaN	NaN
5	0.5	beta	5	7.35927	23.0006	46.3622	-18.1595	NaN	NaN	153.677	102.389	336.481	106.71	NaN	NaN
10	0.5	beta	5	-3.83346	8.66013	7.15553	-16.021	NaN	NaN	88.1082	67.7898	82.2282	71.315	NaN	NaN
20	0.5	beta	5	-1.37468	0.52451	2.11711	-9.7308	NaN	NaN	80.7515	42.9747	53.8278	60.7179	NaN	NaN
30	0.5	beta	5	-0.944984	3.56924	-0.074086	-6.00349	NaN	NaN	55.288	39.1002	34.1485	47.7542	NaN	NaN
40	0.5	beta	5	-0.464889	1.26916	-0.4827	-4.31168	NaN	NaN	50.5253	31.8981	28.6431	46.3701	NaN	NaN
50	0.5	beta	5	-1.37578	0.66802	-0.78713	-4.60368	NaN	NaN	45.1492	27.8242	25.8774	40.9389	NaN	NaN
60	0.5	beta	5	-1.37385	0.21896	-0.520404	-4.37903	NaN	NaN	41.9212	26.2905	25.1049	37.224	NaN	NaN
70	0.5	beta	5	-0.599383	1.26115	-0.992572	-2.71634	NaN	NaN	37.1417	24.1465	20.8332	35.3197	NaN	NaN
80	0.5	beta	5	0.130676	1.60994	-0.708412	-1.99875	NaN	NaN	34.7193	22.5732	21.0468	33.1059	NaN	NaN
90	0.5	beta	5	-0.00284884	0.97786	-0.320824	-2.01085	NaN	NaN	33.7297	21.9879	20.4564	31.4595	NaN	NaN
100	0.5	beta	5	-0.577485	0.53035	-0.70069	-2.45854	NaN	NaN	34.6173	20.5334	19.2086	31.2264	NaN	NaN
5	0.6	beta	5	0.566601	30.1056	38.0406	-23.5722	NaN	NaN	101.471	101.226	222.335	81.8752	NaN	NaN
10	0.6	beta	5	1.43994	10.3906	22.2409	-16.1111	NaN	NaN	100.1	72.2141	141.166	73.3048	NaN	NaN
20	0.6	beta	5	-0.316863	4.02558	3.97283	-8.7428	NaN	NaN	75.9055	51.5504	50.7434	60.7785	NaN	NaN
30	0.6	beta	5	-0.890899	2.36328	2.96578	-6.99149	NaN	NaN	54.0215	42.3258	41.4082	48.3868	NaN	NaN
40	0.6	beta	5	-1.0653	1.97395	0.679792	-6.08501	NaN	NaN	51.8805	35.636	34.0601	45.0578	NaN	NaN
50	0.6	beta	5	-0.767819	1.0738	0.443328	-5.1152	NaN	NaN	51.9483	32.5826	30.7206	42.4001	NaN	NaN
60	0.6	beta	5	0.563142	2.68369	-0.423162	-2.84642	NaN	NaN	41.8754	28.8045	27.0898	39.1929	NaN	NaN
70	0.6	beta	5	0.577829	2.04071	-0.11988	-2.43072	NaN	NaN	40.7859	26.9784	25.1085	36.5163	NaN	NaN
80	0.6	beta	5	0.113681	1.79694	-0.020864	-2.54654	NaN	NaN	34.7066	26.3758	23.9336	32.6866	NaN	NaN
90	0.6	beta	5	-0.233969	0.31446	-0.025698	-3.04281	NaN	NaN	41.4959	23.6887	23.6227	35	NaN	NaN
100	0.6	beta	5	1.85107	1.61941	0.449586	-0.514495	NaN	NaN	35.1235	22.8021	22.0394	32.1298	NaN	NaN
5	0.7	beta	5	18.0318	57.8976	22.702	-15.3367	NaN	NaN	146.927	122.176	147.798	82.5529	NaN	NaN
10	0.7	beta	5	11.3026	29.0727	36.1398	-11.2458	NaN	NaN	124.17	90.0713	277.286	85.455	NaN	NaN
20	0.7	beta	5	-2.39058	10.6257	11.5637	-13.8515	NaN	NaN	65.8985	61.4946	132.679	56.574	NaN	NaN
30	0.7	beta	5	-0.800389	4.81712	5.87886	-9.71349	NaN	NaN	63.3453	50.0325	57.3382	48.8749	NaN	NaN
40	0.7	beta	5	-0.390774	2.91446	3.50581	-7.047	NaN	NaN	52.4484	43.4033	42.467	46.1681	NaN	NaN
50	0.7	beta	5	-0.871223	4.00415	1.0983	-6.39078	NaN	NaN	44.08	38.8388	36.5354	38.9115	NaN	NaN
60	0.7	beta	5	0.865615	1.12469	3.86881	-3.8283	NaN	NaN	41.414	35.9221	35.9671	37.6147	NaN	NaN
70	0.7	beta	5	-2.71694	0.82128	0.969308	-6.605	NaN	NaN	34.9879	32.7919	31.3471	33.1685	NaN	NaN
80	0.7	beta	5	-0.0826976	1.97437	0.78834	-3.99442	NaN	NaN	40.6777	31.0187	29.5123	34.6657	NaN	NaN
90	0.7	beta	5	-0.381176	2.69705	0.165218	-3.46184	NaN	NaN	33.9541	29.8765	26.3313	31.6194	NaN	NaN
100	0.7	beta	5	2.24599	2.79653	1.43436	-0.499466	NaN	NaN	34.4052	29.0102	24.6027	31.9978	NaN	NaN
5	0.8	beta	5	44.7699	125.095	26.492	-2.65736	NaN	NaN	154.911	189.885	197.082	89.1534	NaN	NaN
10	0.8	beta	5	15.5627	58.3942	45.4556	-14.591	NaN	NaN	97.3816	125.801	257.377	74.5308	NaN	NaN
20	0.8	beta	5	6.13838	29.3245	23.5743	-12.0626	NaN	NaN	66.8542	89.2452	143.678	58.3301	NaN	NaN
30	0.8	beta	5	0.934356	16.8986	21.8224	-12.5314	NaN	NaN	54.8607	72.7775	208.338	48.5492	NaN	NaN
40	0.8	beta	5	0.929244	14.5291	6.30765	-9.28444	NaN	NaN	56.4558	61.7631	68.905	44.7172	NaN	NaN
50	0.8	beta	5	0.783715	8.69849	6.64454	-7.21665	NaN	NaN	45.7641	52.8432	56.062	41.3887	NaN	NaN
60	0.8	beta	5	2.48318	8.5776	5.8748	-5.13728	NaN	NaN	50.4285	51.9211	58.0387	40.4561	NaN	NaN
70	0.8	beta	5	0.12624	5.04829	4.53163	-6.15887	NaN	NaN	39.1722	45.4551	42.4355	35.2792	NaN	NaN
80	0.8	beta	5	-0.810125	3.24436	4.82649	-5.85598	NaN	NaN	34.1193	43.5877	39.6451	31.958	NaN	NaN
90	0.8	beta	5	0.382795	2.62909	3.99914	-4.46303	NaN	NaN	37.5248	40.1885	34.6371	31.4289	NaN	NaN
100	0.8	beta	5	-1.00614	2.94681	2.44002	-5.08451	NaN	NaN	30.3376	38.4574	31.3664	28.8291	NaN	NaN
5	0.9	beta	5	118.217	306.364	6.91965	40.176	NaN	NaN	180.457	382.619	157.923	100.867	NaN	NaN
10	0.9	beta	5	62.3304	201.636	26.1892	4.77695	NaN	NaN	135.149	299.976	238.467	70.5091	NaN	NaN
20	0.9	beta	5	26.0212	112.345	47.8619	-11.1787	NaN	NaN	79.0468	211.446	302.31	52.178	NaN	NaN
30	0.9	beta	5	13.6972	77.6946	42.8353	-13.6718	NaN	NaN	56.7819	167.166	309.671	46.1147	NaN	NaN
40	0.9	beta	5	9.88563	59.4652	42.7256	-14.1471	NaN	NaN	60.856	148.843	255.927	48.2846	NaN	NaN
50	0.9	beta	5	7.56128	47.9497	25.3481	-11.7085	NaN	NaN	47.3604	129.098	191.747	41.898	NaN	NaN
60	0.9	beta	5	5.97055	31.243	19.9089	-10.3686	NaN	NaN	49.5988	106.61	115.079	38.7006	NaN	NaN
70	0.9	beta	5	2.17143	27.9964	23.1726	-10.1981	NaN	NaN	35.9953	92.4188	275.458	34.6938	NaN	NaN
80	0.9	beta	5	2.5607	26.3351	12.0473	-8.70361	NaN	NaN	35.3957	86.1769	92.9388	32.9674	NaN	NaN
90	0.9	beta	5	3.50477	25.568	8.36115	-7.58479	NaN	NaN	38.9188	84.0831	73.3084	33.0077	NaN	NaN
100	0.9	beta	5	2.93323	17.8612	10.8407	-7.17644	NaN	NaN	39.5648	73.9484	71.9722	30.2818	NaN	NaN
5	0.1	ml	2	-2.39336	3.89159	-4.79125	-2.54333	2.41009	-3.2273	33.3835	32.937	27.6992	53.2039	37.0964	32.6769
10	0.1	ml	2	-1.09766	2.60202	-3.13295	-1.79822	1.22936	-1.5556	24.0768	23.6859	16.7988	34.0294	25.0844	23.8537
20	0.1	ml	2	-0.463186	1.37283	-1.69856	-0.718832	0.722848	-0.723127	17.5199	16.0837	11.6861	24.9758	17.9284	17.4028
30	0.1	ml	2	-0.609982	0.477196	-0.882729	-0.576638	0.186659	-0.791705	14.1951	12.9833	9.62389	20.1694	14.3971	14.1335
40	0.1	ml	2	-0.296847	0.544431	-0.689875	-0.329229	0.30226	-0.436451	12.1802	11.2604	8.7551	17.5231	12.3193	12.1363
50	0.1	ml	2	-0.804269	-0.0598752	-0.63557	-0.919912	-0.329227	-0.915021	10.5925	9.833	7.58916	15.0305	10.6596	10.5707
60	0.1	ml	2	-0.505354	-0.136623	-0.214684	-0.249723	-0.10368	-0.600774	10.0687	9.00308	7.08536	14.5099	10.1348	10.0469
70	0.1	ml	2	-0.0443246	0.225906	-0.082939	0.254927	0.301738	-0.126763	8.97376	8.15858	6.30887	12.8583	9.0372	8.95406
80	0.1	ml	2	0.187686	0.562594	-0.262553	0.249951	0.48917	0.115921	8.65452	8.07646	6.053	12.1959	8.71319	8.63699
90	0.1	ml	2	0.0759213	0.445091	-0.297274	0.0944648	0.34304	0.0124724	8.09667	7.38466	5.41615	11.3372	8.14302	8.08279
100	0.1	ml	2	-0.0967851	-0.0393001	0.112809	0.285987	0.1461	-0.155574	7.92315	7.14055	5.59192	11.3663	7.96033	7.9112
5	0.2	ml	2	-1.11856	4.69577	-3.33257	-0.661889	4.10564	-2.17768	35.7855	35.6425	36.0831	59.2543	41.0601	34.626
10	0.2	ml	2	0.107691	2.92466	-1.45831	0.698308	2.59546	-0.435392	23.9192	23.9561	19.6102	35.6601	25.2034	23.5731
20	0.2	ml	2	-0.55696	0.802412	-0.813695	-0.214955	0.657756	-0.836188	17.1433	16.3412	13.1412	25.1505	17.5444	17.0218
30	0.2	ml	2	-0.695973	0.231349	-0.569531	-0.514337	0.107428	-0.884182	14.0545	13.2682	10.8391	20.5061	14.2511	13.9935
40	0.2	ml	2	-0.0647846	0.474435	-0.181963	0.310954	0.543928	-0.209015	12.099	11.6143	9.21919	17.3764	12.2414	12.0579
50	0.2	ml	2	-0.159863	0.123207	0.0578738	0.35784	0.328243	-0.276693	10.9003	10.2834	8.14343	15.65	11.0004	10.8696
60	0.2	ml	2	0.187393	0.652113	-0.307375	0.297516	0.590442	0.0916341	10.2464	9.60557	7.35399	14.5575	10.3362	10.2196
70	0.2	ml	2	-0.396775	0.169669	-0.483579	-0.557989	-0.0558795	-0.47783	9.02938	8.68243	7.1332	13.0475	9.07644	9.01449
80	0.2	ml	2	0.25986	0.485351	-0.0367866	0.50828	0.563661	0.186641	8.65744	8.19464	6.60496	12.4864	8.7195	8.63893
90	0.2	ml	2	-0.427055	-0.0173727	-0.352175	-0.50733	-0.161489	-0.490628	8.14943	7.6568	6.26996	11.8076	8.18006	8.13901
100	0.2	ml	2	0.129361	0.315108	-0.0354961	0.32564	0.371551	0.0709229	7.70534	7.31866	5.75658	11.0074	7.74653	7.69285
5	0.3	ml	2	-2.162	3.59513	-0.831441	-2.41772	3.34078	-3.40944	34.8802	36.2445	54.7916	56.9849	40.3519	34.2492
10	0.3	ml	2	-1.67006	1.51215	-1.65341	-2.08041	0.760228	-2.23754	24.2594	23.5257	30.3463	38.2067	25.4987	23.9438
20	0.3	ml	2	-0.826613	0.372565	-0.549659	-0.366405	0.397192	-1.11662	17.6273	17.0088	14.578	26.1833	18.0174	17.515
30	0.3	ml	2	-0.537625	0.0982616	-0.181859	-0.028201	0.279298	-0.735017	14.0184	13.2869	12.0334	21.4119	14.2373	13.9502
40	0.3	ml	2	-0.15264	0.42739	-0.272471	0.131817	0.455151	-0.297883	12.321	11.713	9.73146	18.0719	12.4686	12.2753
50	0.3	ml	2	-0.294217	0.211934	-0.291491	-0.144589	0.189209	-0.410088	10.76	10.2343	8.88176	16.0131	10.856	10.7306
60	0.3	ml	2	-0.479964	0.0387328	-0.368511	-0.491493	-0.080137	-0.575682	9.81923	9.45057	8.07825	14.4532	9.88035	9.79981
70	0.3	ml	2	-0.342484	0.135908	-0.393563	-0.41871	0.000241592	-0.425069	9.3141	8.80939	7.824	13.9989	9.37018	9.29541
80	0.3	ml	2	0.113104	0.430354	-0.15802	0.211861	0.415419	0.040244	9.03626	8.7978	6.92503	12.8426	9.09196	9.01978
90	0.3	ml	2	0.283068	0.582973	-0.157242	0.333322	0.551981	0.217979	7.99372	7.90187	6.80585	11.841	8.04618	7.97841
100	0.3	ml	2	0.231947	0.376508	0.0136362	0.459415	0.474964	0.172844	7.76409	7.40828	6.34548	11.4854	7.81007	7.7503
5	0.4	ml	2	-0.884855	4.58818	-1.19149	-0.247182	4.51007	-2.04869	33.5612	35.6737	40.5382	56.3471	37.5087	32.9933
10	0.4	ml	2	-1.40283	1.08664	0.320338	-1.07576	1.15586	-2.06851	24.6235	25.9137	31.569	38.3757	25.7179	24.4498
20	0.4	ml	2	-0.249676	0.422821	0.621363	0.748746	1.02171	-0.579076	17.4143	17.9289	18.5893	27.07	17.8422	17.3031
30	0.4	ml	2	-0.057046	0.382008	0.224444	0.657831	0.7736	-0.26518	14.1421	14.0558	13.365	21.8786	14.3904	14.0611
40	0.4	ml	2	0.327978	1.11378	-0.476011	0.217963	0.934922	0.181082	12.4515	12.6543	10.9874	18.5233	12.6145	12.4046
50	0.4	ml	2	-0.598952	-0.495095	0.361082	0.0300402	-0.107455	-0.721443	11.123	11.132	10.2897	16.9237	11.2082	11.0947
60	0.4	ml	2	-0.202924	0.223221	-0.195963	-0.130753	0.200169	-0.301025	10.118	10.0928	8.90969	15.0491	10.1911	10.0954
70	0.4	ml	2	-0.0250517	0.265625	-0.0681951	0.113044	0.322048	-0.110549	9.51021	9.53584	8.73133	14.449	9.57681	9.48863
80	0.4	ml	2	0.0262527	0.113907	0.21816	0.38238	0.331796	-0.0494478	8.54827	8.87474	8.20863	12.9655	8.60009	8.5324
90	0.4	ml	2	-0.666484	-0.296802	-0.272622	-0.742812	-0.400752	-0.731049	8.17343	8.06955	7.26622	12.2968	8.19647	8.16455
100	0.4	ml	2	0.101848	0.395472	-0.177437	0.0793169	0.343284	0.0429152	7.92362	7.98577	7.12555	11.8742	7.96427	7.91158
5	0.5	ml	2	0.697869	6.72275	0.659381	-0.965511	6.81313	-0.893429	34.0596	37.7028	61.5546	57.9042	45.5668	32.7308
10	0.5	ml	2	-2.14561	0.802735	0.631508	-3.09228	0.383234	-2.8563	24.3677	27.6772	35.4427	38.1889	25.3263	24.2043
20	0.5	ml	2	-1.48059	-0.218035	0.0351053	-1.70442	-0.243786	-1.82187	17.21	18.9372	22.2194	27.5033	17.5392	17.1216
30	0.5	ml	2	-0.435029	0.504226	-0.134242	-0.624341	0.378342	-0.641912	13.6833	15.7492	15.1304	20.7358	13.8424	13.6464
40	0.5	ml	2	-0.251586	0.249609	-0.00359365	-0.128803	0.362211	-0.40832	12.605	13.3455	13.166	19.8555	12.7492	12.5587
50	0.5	ml	2	-0.606792	0.157151	-0.498838	-0.98098	-0.128146	-0.724857	11.0388	11.9448	11.0789	16.6244	11.1088	11.0183
60	0.5	ml	2	-0.349844	-0.012679	0.0371065	-0.265338	0.0553722	-0.451493	9.98499	11.0056	10.5309	15.3531	10.0444	9.96773
70	0.5	ml	2	-0.52207	-0.343578	0.166584	-0.256252	-0.174905	-0.608277	9.38341	10.0214	9.14593	14.0346	9.4228	9.37209
80	0.5	ml	2	0.0502011	0.487886	-0.218284	-0.144041	0.351714	-0.0241759	8.41239	9.58998	8.92105	12.8595	8.45733	8.40059
90	0.5	ml	2	-0.0682865	0.0900025	0.170816	0.081432	0.201987	-0.13576	8.33494	9.49996	8.64919	12.3266	8.36815	8.32701
100	0.5	ml	2	0.0482129	0.232065	0.0457792	0.100785	0.291155	-0.0126049	8.0336	8.90549	8.52652	12.4394	8.07026	8.02306
5	0.6	ml	2	4.9433	10.7263	4.26964	1.32827	13.1671	2.32664	34.0926	38.2462	87.693	60.2523	64.4592	29.3802
10	0.6	ml	2	0.459743	2.62029	3.68808	-0.209974	3.29942	-0.532052	25.3616	30.1749	46.7934	42.3168	27.0548	24.9543
20	0.6	ml	2	-0.761929	0.264077	0.758635	-0.81177	0.500436	-1.11499	17.9314	21.2382	22.3058	27.6574	18.2297	17.8797
30	0.6	ml	2	-0.455235	0.310635	0.576798	-0.660138	0.370194	-0.678831	14.5362	18.2084	18.0271	21.6362	14.6589	14.5258
40	0.6	ml	2	0.206169	0.650115	0.497579	0.234617	0.827483	0.0405405	12.5214	15.3795	15.3296	19.387	12.6447	12.4955
50	0.6	ml	2	-0.622254	-0.331069	0.545264	-0.545322	-0.130919	-0.752204	11.3089	14.2038	13.9404	17.1224	11.3535	11.3047
60	0.6	ml	2	-0.4114	0.380961	-0.4509	-1.10492	-0.0128534	-0.512631	10.3168	12.6483	12.1036	15.7144	10.3594	10.3083
70	0.6	ml	2	-0.243025	0.287511	-0.18681	-0.591185	0.101101	-0.329857	9.47039	11.4118	10.7861	14.3697	9.50997	9.46127
80	0.6	ml	2	0.310644	0.712575	-0.0893698	0.100215	0.613991	0.234354	9.24176	10.9713	9.94314	13.7574	9.29311	9.22881
90	0.6	ml	2	-0.0369564	0.257079	0.0118396	-0.162661	0.232435	-0.105165	8.26203	10.0236	9.80181	12.9438	8.29532	8.25397
100	0.6	ml	2	-0.118277	0.00501174	0.222221	-0.0258124	0.125126	-0.179925	8.06405	9.68	9.15408	12.3398	8.09005	8.05752
5	0.7	ml	2	11.0204	20.0003	-2.71333	3.4868	16.8023	9.4892	29.375	41.3105	51.9488	56.9508	35.7393	28.312
10	0.7	ml	2	5.07514	8.61114	5.15737	0.412157	8.28118	3.65424	28.5889	36.1123	77.699	41.931	35.2851	26.8553
20	0.7	ml	2	0.278449	2.4658	1.8617	-2.4395	1.54025	-0.173608	19.2355	26.5226	41.266	27.8291	19.4219	19.4008
30	0.7	ml	2	-0.358762	0.739558	1.09017	-1.45302	0.468659	-0.609985	15.8069	21.8747	23.321	22.3335	15.8786	15.8369
40	0.7	ml	2	0.0855377	0.872737	0.497821	-0.678465	0.702001	-0.0875158	13.2645	18.2781	18.1122	19.7505	13.3383	13.2638
50	0.7	ml	2	-0.124928	0.873407	-0.164118	-1.23356	0.356252	-0.253372	12.1787	16.7176	15.4624	17.2596	12.2147	12.1847
60	0.7	ml	2	-0.572713	-0.711998	1.48018	-0.165547	-0.156145	-0.688594	11.5151	15.9518	15.2207	16.1064	11.5238	11.5282
70	0.7	ml	2	-0.35271	0.306997	-0.00324028	-1.10045	-0.00892752	-0.443485	9.99764	14.0983	13.486	14.6014	10.0073	10.0065
80	0.7	ml	2	-0.750419	-0.2489	0.127228	-1.28124	-0.450145	-0.829173	9.50036	13.4229	12.3953	13.3621	9.49231	9.51085
90	0.7	ml	2	0.0706872	0.662739	-0.130316	-0.596602	0.337858	0.00175981	9.40973	12.8957	11.4497	13.0504	9.42834	9.41106
100	0.7	ml	2	0.780553	0.914508	0.422788	0.775987	1.02655	0.717073	8.82947	11.9021	10.3563	12.2586	8.86691	8.82435
5	0.8	ml	2	28.3386	42.18	-6.94146	10.538	34.4752	26.5993	38.9357	59.062	57.6965	57.5512	50.1166	37.0108
10	0.8	ml	2	11.2964	18.7466	2.37216	-0.328665	13.9934	10.2056	29.8974	46.3083	60.2528	38.2046	30.904	30.1455
20	0.8	ml	2	3.90006	7.51409	3.09514	-2.23438	5.16834	3.39852	23.0706	35.8801	44.5087	28.1651	23.1549	23.3123
30	0.8	ml	2	0.69581	2.62067	3.32839	-2.67562	1.52803	0.390372	19.9085	30.596	37.1963	23.3021	19.8475	20.1021
40	0.8	ml	2	1.26216	3.48337	0.427127	-2.20388	1.86023	1.0714	17.0673	26.101	25.6277	19.6222	17.0673	17.1466
50	0.8	ml	2	0.7262	1.50804	1.62617	-0.579376	1.22428	0.570929	14.8164	22.6404	22.1169	17.9361	14.8184	14.8692
60	0.8	ml	2	0.553408	1.54394	1.06612	-1.04927	0.960082	0.430985	14.1493	21.7479	21.3578	16.1752	14.1389	14.2001
70	0.8	ml	2	0.0096229	0.551864	1.10209	-0.933808	0.359881	-0.0917887	12.507	19.6407	17.4305	14.812	12.4866	12.5385
80	0.8	ml	2	0.165755	0.604385	1.19483	-0.577377	0.472356	0.0783095	12.2057	19.0581	16.5046	13.2859	12.1869	12.2373
90	0.8	ml	2	0.244449	0.682717	0.754099	-0.43438	0.515586	0.169752	11.108	17.0993	14.423	12.8113	11.1026	11.1255
100	0.8	ml	2	0.0743361	0.623632	0.452652	-0.775166	0.316017	0.00896555	10.4833	16.5141	13.4537	11.8135	10.4713	10.4995
5	0.9	ml	2	62.8659	84.6217	-12.4166	31.216	69.0201	61.2433	67.5573	97.5132	49.9466	67.6626	74.2979	66.259
10	0.9	ml	2	39.6714	54.2494	-1.90107	12.1798	42.7558	38.0894	51.6499	79.4355	74.9417	39.968	54.0104	51.1374
20	0.9	ml	2	19.8137	29.2887	3.85794	0.814244	21.1148	19.0406	38.9689	62.9066	73.9287	24.9577	39.0665	39.3421
30	0.9	ml	2	11.689	18.3825	7.94353	-1.91935	12.5349	11.1359	33.2701	53.1827	84.8334	22.801	33.198	33.7895
40	0.9	ml	2	8.10376	14.2437	3.15301	-3.66879	8.68249	7.81573	29.8086	47.3194	55.561	20.4993	29.7461	30.0549
50	0.9	ml	2	6.59645	11.768	1.72602	-3.136	7.05555	6.40432	27.3054	43.2402	41.5369	18.8835	27.2573	27.4662
60	0.9	ml	2	5.05099	8.28634	2.03152	-1.4369	5.45366	4.89187	23.3127	37.9622	34.3063	17.1903	23.2758	23.423
70	0.9	ml	2	3.45658	6.57929	3.13922	-2.43959	3.79411	3.31015	21.5955	34.7784	54.3055	15.255	21.542	21.7872
80	0.9	ml	2	2.61679	5.54836	1.60459	-2.8174	2.90795	2.51364	20.9571	33.5423	29.8891	14.4374	20.9101	21.0441
90	0.9	ml	2	3.56703	6.18806	0.842796	-1.40249	3.83059	3.47436	19.355	31.7583	25.9827	13.4871	19.3308	19.4164
100	0.9	ml	2	2.07767	4.12584	1.18886	-1.82806	2.31494	1.99848	18.2033	29.5118	24.2076	12.8515	18.1707	18.2607
5	0.1	ml	3	0.617936	12.0913	-3.59476	10.323	18.3993	-5.82193	74.1214	59.021	53.8632	112.773	121.889	59.6416
10	0.1	ml	3	-0.760024	6.32093	-3.02504	3.0655	5.81098	-3.86274	44.4621	40.0428	27.9117	59.0532	50.1398	41.5004
20	0.1	ml	3	-0.157012	3.07862	-1.88032	1.80939	3.01129	-1.9012	33.1735	26.7966	19.1738	42.2774	35.1937	31.7677
30	0.1	ml	3	-0.246075	1.43764	-0.779935	1.27447	1.84611	-1.46863	27.1093	20.9564	15.8332	34.4031	28.1852	26.294
40	0.1	ml	3	-0.0516524	1.27517	-0.610374	0.982855	1.50576	-0.996834	23.1194	18.2533	14.4204	29.3138	23.8211	22.5448
50	0.1	ml	3	-0.877857	0.399313	-0.621283	-0.123333	0.342584	-1.62232	19.6943	15.6717	12.2058	24.6999	20.1017	19.3619
60	0.1	ml	3	-0.378788	0.0814914	-0.08884	0.559601	0.650628	-1.02475	18.8498	14.5248	11.3765	23.6309	19.1915	18.5726
70	0.1	ml	3	0.059806	0.593853	-0.100433	0.812015	0.940093	-0.497615	16.6135	13.1653	10.1627	20.7976	16.8915	16.3845
80	0.1	ml	3	0.312931	0.938306	-0.216457	0.887247	1.0813	-0.179435	15.6744	12.7228	9.574	19.5042	15.9125	15.4769
90	0.1	ml	3	0.0266009	1.09991	-0.708837	0.303676	0.699826	-0.402951	14.8495	11.8913	8.40154	18.1965	15.0309	14.7012
100	0.1	ml	3	0.307164	0.237893	0.300331	1.04807	0.925944	-0.104691	14.4114	11.2999	8.84208	17.9927	14.5891	14.2581
5	0.2	ml	3	4.80164	12.8359	0.133149	13.6768	30.1485	-4.81307	109.163	63.299	81.2953	140.347	254.941	64.3181
10	0.2	ml	3	2.13428	7.48917	-1.15383	6.38984	9.43501	-1.69068	51.0116	40.603	33.1249	65.5862	62.4504	43.2213
20	0.2	ml	3	0.816158	3.04121	-0.437104	3.17111	4.09939	-1.0692	32.5318	26.0722	21.2971	42.5325	34.8247	30.8058
30	0.2	ml	3	-0.221891	1.40813	-0.530601	1.20244	1.88203	-1.47397	26.9697	21.4007	17.3246	34.6222	28.0695	26.123
40	0.2	ml	3	0.343023	1.28694	-0.0439256	1.59824	1.91596	-0.613869	22.0692	18.3146	14.5879	28.0317	22.7492	21.5568
50	0.2	ml	3	0.253661	0.661347	0.27957	1.43314	1.50833	-0.528639	19.9322	16.5281	12.9973	25.0956	20.4154	19.5506
60	0.2	ml	3	0.619011	1.59454	-0.40917	1.28772	1.65051	-0.0246782	18.4908	15.1017	11.4731	23.1757	18.8808	18.1774
70	0.2	ml	3	-0.208522	0.903007	-0.622387	0.177292	0.662944	-0.76205	17.1622	13.8455	11.2555	21.6448	17.4391	16.9229
80	0.2	ml	3	1.02993	1.20918	0.211335	1.7869	1.81095	0.519626	16.3345	13.3064	10.5805	20.5202	16.6197	16.0932
90	0.2	ml	3	-0.270305	0.368519	-0.285415	0.143918	0.407724	-0.714089	15.0836	12.0762	9.96039	19.0614	15.2677	14.9184
100	0.2	ml	3	0.611717	0.730033	0.190279	1.2334	1.23099	0.198834	14.3365	11.7468	9.27224	17.9942	14.5276	14.1704
5	0.3	ml	3	6.19475	11.6631	6.43726	8.10949	76.5115	-7.39024	190.122	62.9081	156.451	113.52	1681.77	59.9965
10	0.3	ml	3	0.0494788	4.35251	1.39295	3.11481	8.42847	-4.61922	56.0022	39.1458	88.8584	72.8843	82.3754	46.0458
20	0.3	ml	3	0.465171	1.52818	0.818842	3.12856	3.84183	-1.58598	34.3257	27.5812	25.2054	45.0381	36.7376	32.5015
30	0.3	ml	3	0.330732	0.84476	0.556416	2.144	2.50359	-1.02714	26.7602	20.981	19.8276	35.2744	27.9999	25.7361
40	0.3	ml	3	0.424344	1.38104	-0.0217042	1.55659	2.00503	-0.557603	22.9666	19.1371	15.9193	29.3605	23.7043	22.3679
50	0.3	ml	3	0.826124	1.02354	0.399043	1.99065	2.09811	0.0129459	20.4708	16.3601	14.7354	26.6022	21.0358	20.0046
60	0.3	ml	3	-0.108376	0.556079	-0.0556942	0.618594	0.924287	-0.767387	18.5015	15.4021	12.9561	23.584	18.8639	18.1977
70	0.3	ml	3	-0.271361	0.216555	0.0277836	0.340337	0.611571	-0.848654	17.0247	14.0047	12.724	22.0349	17.3125	16.7656
80	0.3	ml	3	0.249896	0.71036	0.0169866	0.807854	1.02252	-0.256518	16.1502	13.6801	11.3165	20.4901	16.3982	15.937
90	0.3	ml	3	0.674091	1.16484	-0.0132397	1.12828	1.36128	0.21912	14.6894	12.6275	10.6877	18.8192	14.9151	14.4952
100	0.3	ml	3	0.454543	0.783632	0.00496334	0.919695	1.0717	0.040496	14.4764	11.9508	10.1914	18.4626	14.6663	14.3086
5	0.4	ml	3	4.07895	13.4525	3.82465	14.186	24.9711	-4.33251	76.4257	63.3627	77.0826	120.627	121.009	61.3126
10	0.4	ml	3	1.65799	5.71424	2.83559	4.77502	9.72302	-3.18423	49.9077	41.605	57.7156	68.3458	61.3388	43.3881
20	0.4	ml	3	0.0287527	2.20526	0.485309	1.5983	3.38885	-2.11412	33.2244	27.9516	31.5231	44.1379	35.7717	31.1946
30	0.4	ml	3	1.53885	1.69489	1.13062	3.23546	3.77773	0.0514376	28.155	22.4865	22.8163	36.8922	29.7092	26.5885
40	0.4	ml	3	1.50808	2.56824	0.00586613	2.43885	3.11187	0.491723	23.6773	20.0681	17.6963	30.9247	24.5281	22.9845
50	0.4	ml	3	-0.329333	-0.20709	0.64275	0.731869	0.935209	-1.15674	21.0341	17.6711	16.2895	27.3181	21.549	20.578
60	0.4	ml	3	-0.0989558	0.579531	0.0069585	0.520349	0.937158	-0.773235	18.6807	15.7782	14.3693	24.1777	19.0641	18.3367
70	0.4	ml	3	0.487873	0.932762	0.0932716	1.01877	1.38165	-0.111641	18.2231	15.2133	14.1062	23.6663	18.5811	17.8711
80	0.4	ml	3	0.764055	0.808527	0.509336	1.41222	1.54943	0.229335	16.1917	14.3037	13.2167	21.0177	16.4864	15.8948
90	0.4	ml	3	-0.662805	-0.202676	-0.0280037	-0.277631	0.0173102	-1.12117	15.2559	12.7938	11.8942	19.818	15.4372	15.0747
100	0.4	ml	3	0.709963	0.942441	0.146537	1.14523	1.33137	0.284931	15.0166	12.757	11.537	19.4525	15.2271	14.8257
5	0.5	ml	3	27.4365	16.2406	14.1165	9.76282	301.354	-5.37836	693.275	64.0788	195.05	119.39	8321.25	57.3191
10	0.5	ml	3	1.02509	5.4045	5.50166	2.55693	9.40373	-4.36691	53.0776	44.617	69.7078	69.3201	67.2506	43.3393
20	0.5	ml	3	0.941323	1.17135	3.14816	2.31796	4.63906	-1.86414	37.8497	29.6799	44.1311	47.6846	42.6596	32.5554
30	0.5	ml	3	0.391099	2.00178	1.07619	1.10574	2.56433	-1.04534	24.9094	25.66	25.1462	33.0774	26.065	23.9783
40	0.5	ml	3	0.700225	1.29896	0.660803	1.44719	2.32672	-0.410774	24.8157	21.3184	21.7774	33.0693	25.7463	23.9029
50	0.5	ml	3	-0.700035	0.725192	-0.209938	-0.480638	0.539367	-1.51649	20.0829	18.6927	17.9439	26.5563	20.5653	19.6391
60	0.5	ml	3	0.204973	0.830685	0.427685	0.580944	1.25501	-0.514673	18.6397	17.7503	17.5662	24.8514	19.0688	18.2177
70	0.5	ml	3	-0.137233	0.223212	0.41775	0.422036	0.752314	-0.732464	16.9469	15.7931	14.504	22.1072	17.2341	16.6999
80	0.5	ml	3	0.31744	0.92196	0.191174	0.589816	1.09424	-0.211075	15.6475	15.1763	14.272	20.8582	15.9111	15.4082
90	0.5	ml	3	0.395941	0.641842	0.544533	0.796642	1.08815	-0.0821314	14.9647	15.1538	13.5657	19.4221	15.1792	14.7772
100	0.5	ml	3	0.583798	0.698835	0.464166	0.953397	1.20824	0.144181	14.649	13.8724	13.3131	19.5248	14.86	14.4472
5	0.6	ml	3	102.445	22.9804	34.8719	18.1332	1072.5	-0.68468	1579.37	64.602	319.543	134.954	20380.5	50.2466
10	0.6	ml	3	9.4469	7.6934	14.3098	6.52443	23.253	-1.3012	97.6472	47.2593	110.191	83.6302	172.849	47.7335
20	0.6	ml	3	1.0842	2.85756	2.85108	1.67251	4.64681	-1.48195	34.1005	33.065	38.7528	45.962	37.1117	31.4295
30	0.6	ml	3	0.639349	2.0301	2.09631	0.92882	2.86824	-0.955887	26.9678	28.254	30.3264	36.0054	28.3141	25.7661
40	0.6	ml	3	1.16757	1.74713	1.81188	1.58798	2.82093	-0.0174351	23.0416	23.8473	25.3932	31.4453	23.9578	22.1838
50	0.6	ml	3	-0.00765917	0.286701	1.71148	0.431908	1.28044	-0.924426	20.4661	22.1569	22.3073	27.465	20.9991	19.996
60	0.6	ml	3	-0.246517	1.13463	0.0965108	-0.445658	0.791845	-0.968686	18.6806	19.559	19.4026	25.3214	19.0782	18.3053
70	0.6	ml	3	0.171452	1.11746	0.340605	0.137421	1.06412	-0.455397	17.585	18.3196	17.8327	23.5814	17.9209	17.2576
80	0.6	ml	3	0.907496	1.67206	0.397754	0.942384	1.69112	0.357095	16.5616	17.878	16.3368	21.8432	16.857	16.2901
90	0.6	ml	3	0.0548319	0.726209	0.272629	0.030835	0.744609	-0.43886	15.2565	15.8501	15.9827	20.8214	15.4856	15.0194
100	0.6	ml	3	0.507607	0.870423	0.450974	0.645886	1.13122	0.0607099	14.8119	15.2233	14.6514	19.9205	15.0234	14.5995
5	0.7	ml	3	22.6765	41.8164	4.21602	19.1428	54.4447	9.86232	94.5069	75.6464	106.956	129.835	250.892	51.7039
10	0.7	ml	3	165.12	19.7784	29.0473	7.96146	768.747	4.58183	4601.81	58.8067	343.529	76.3398	22872.1	45.9838
20	0.7	ml	3	5.10708	6.9859	9.29446	-0.182527	10.3242	-0.576678	75.4469	41.5506	114.56	47.331	112.883	32.7036
30	0.7	ml	3	0.905111	2.71529	4.42428	-0.301937	3.23427	-1.1002	28.3427	33.7263	42.7024	36.234	30.2335	25.9603
40	0.7	ml	3	1.4931	2.53932	2.71978	1.00579	3.17587	0.172716	24.3566	28.7493	30.921	33.0117	25.3683	23.2925
50	0.7	ml	3	0.64881	3.1322	0.568171	-0.453403	1.9164	-0.283714	20.7006	26.1367	25.348	27.9781	21.2803	20.1452
60	0.7	ml	3	0.712503	0.39948	3.07274	0.903603	1.8085	-0.147871	19.7193	24.465	25.2146	26.2519	20.1833	19.2581
70	0.7	ml	3	-0.0410358	1.47139	0.776215	-0.714015	0.851645	-0.703447	16.7766	21.9803	21.7529	22.9845	17.0704	16.5185
80	0.7	ml	3	-0.455389	0.718037	0.675668	-0.945571	0.320335	-1.03043	15.8389	20.395	19.6323	21.5969	16.0673	15.6019
90	0.7	ml	3	0.71496	1.73499	0.695913	0.275624	1.41089	0.193656	15.9263	20.226	18.8471	21.2313	16.1664	15.6987
100	0.7	ml	3	1.67011	2.07966	1.06101	1.61407	2.30402	1.20109	14.7831	19.1193	16.8893	19.6107	15.0181	14.5866
5	0.8	ml	3	57.7927	81.4351	0.202912	27.5562	180.078	31.3102	405.008	110.198	143.032	130.01	2853.83	53.7343
10	0.8	ml	3	22.301	40.5473	14.1645	5.88155	34.153	12.8637	66.9912	79.3289	125.014	74.515	100.549	46.7301
20	0.8	ml	3	10.1896	18.442	12.2369	0.602752	14.684	5.11541	43.1133	57.0894	98.532	46.9067	52.0287	33.1628
30	0.8	ml	3	7.62148	8.88707	16.6991	-1.64194	12.0049	1.14716	105.62	47.8817	188.083	38.108	159.36	28.6551
40	0.8	ml	3	3.35875	9.90474	2.80208	-1.7879	5.03784	1.64546	27.3358	41.5351	49.6065	32.0232	29.0232	24.3236
50	0.8	ml	3	2.7908	4.96771	4.80839	0.514592	4.15588	1.47448	23.1717	35.586	40.5554	29.0636	23.9764	22.0902
60	0.8	ml	3	2.23986	4.74035	3.86848	-0.00175423	3.34024	1.2153	20.9065	33.9868	41.9599	26.4179	21.3945	20.4988
70	0.8	ml	3	0.621637	2.35114	3.03042	-1.01374	1.54291	-0.18279	18.3388	30.6488	29.6683	23.8676	18.6539	17.9895
80	0.8	ml	3	0.948101	2.09378	3.5011	-0.237852	1.75457	0.247041	16.899	29.6606	28.3795	21.1475	17.1185	16.7745
90	0.8	ml	3	0.930167	1.81377	2.5476	0.125902	1.63937	0.347236	16.0443	26.6997	23.6512	20.2706	16.2465	15.8796
100	0.8	ml	3	0.903061	1.7995	2.34289	0.0457608	1.53865	0.378241	14.9422	26.3935	22.5461	19.0408	15.1094	14.8012
5	0.9	ml	3	106.391	172.548	-9.39089	65.9115	153.805	88.4333	170.521	200.451	103.784	156.764	513.6	98.1078
10	0.9	ml	3	92.4155	111.734	19.2319	24.9369	150.062	54.0004	381.718	157.702	226.192	82.2554	1001.97	72.9095
20	0.9	ml	3	44.8136	64.8636	25.0711	3.0856	57.9406	26.8968	204.94	118.929	235.977	42.5789	351.012	51.2019
30	0.9	ml	3	37.5895	42.2753	25.3166	-1.15303	51.4381	15.7049	532.623	93.7059	283.852	37.3497	868.935	41.6514
40	0.9	ml	3	15.4201	31.7205	19.8677	-3.3775	17.7761	10.6381	53.4894	82.5362	174.259	33.9464	62.2968	37.6117
50	0.9	ml	3	10.8706	26.4136	12.9284	-3.9816	12.3914	8.13801	37.652	74.5187	138.667	29.7668	40.9042	32.7672
60	0.9	ml	3	8.52613	18.6793	8.81471	-1.52284	9.70664	6.72794	29.9361	64.4604	77.158	27.3745	30.8457	28.4258
70	0.9	ml	3	8.16234	16.7978	14.3017	-2.39673	9.47471	5.11808	57.1453	57.8048	217.001	23.6905	68.0151	25.4699
80	0.9	ml	3	4.3638	14.0219	5.80367	-3.40849	5.14403	3.39573	23.5151	54.0045	59.1755	22.2665	23.6342	23.9091
90	0.9	ml	3	5.93885	14.3837	3.78344	-1.36381	6.65779	4.94869	22.948	51.845	47.8396	21.6511	23.2642	22.2345
100	0.9	ml	3	3.77218	11.3265	3.91591	-2.45108	4.39882	2.9719	21.1108	47.8517	46.5698	20.0627	21.2397	21.1783
5	0.1	ml	4	13.4332	20.2297	-1.88216	26.2556	77.1433	-9.07253	192.554	82.1883	85.2688	192.62	747.727	86.2005
10	0.1	ml	4	3.34617	11.1163	-2.13361	10.2241	15.6652	-5.31456	68.1706	54.1648	36.7661	81.2938	84.9791	55.6664
20	0.1	ml	4	2.60332	4.99656	-1.29899	5.99646	8.14367	-2.30242	50.5677	34.5164	24.7149	57.1312	55.9288	44.6342
30	0.1	ml	4	0.647603	2.6095	-0.921006	2.76167	4.10791	-2.64932	39.5287	27.0718	19.8084	44.5392	41.9904	36.5812
40	0.1	ml	4	0.788183	1.74513	-0.289447	2.36236	3.36072	-1.84471	33.4839	23.3551	17.844	37.3925	35.0683	31.3636
50	0.1	ml	4	-0.619417	0.917606	-0.699617	0.566949	1.36244	-2.68973	28.0359	19.7782	15.0415	31.2861	28.9739	26.7489
60	0.1	ml	4	0.551551	0.929726	-0.0675973	1.70254	2.22925	-1.29486	26.6732	18.6171	14.2462	29.8433	27.4612	25.5864
70	0.1	ml	4	0.984807	0.975173	0.297768	2.06319	2.42456	-0.657102	23.8513	16.8669	12.8318	26.6132	24.4924	22.9153
80	0.1	ml	4	0.980631	1.25159	0.0440646	1.83304	2.23193	-0.493916	22.6064	16.1706	12.3175	25.1757	23.1417	21.7781
90	0.1	ml	4	0.696119	1.58196	-0.504522	1.4028	1.79177	-0.606689	21.4037	15.1038	10.7121	23.7261	21.8271	20.7543
100	0.1	ml	4	1.22159	0.779276	0.474958	2.02664	2.22566	-0.0447814	20.4144	14.3358	11.1926	22.755	20.8171	19.7583
5	0.2	ml	4	39.4256	20.8774	6.87684	33.4064	226.133	-7.70004	592.545	89.1235	149.044	263.427	3216.9	94.2155
10	0.2	ml	4	8.36101	11.1102	-0.0134023	12.7625	24.1857	-3.88264	128.294	53.5093	45.6903	96.6207	212.084	62.363
20	0.2	ml	4	2.09638	4.346	-0.407029	5.1459	7.66941	-2.94314	49.8994	34.1224	26.933	56.5432	55.3456	43.7464
30	0.2	ml	4	2.11147	3.15278	-0.148889	4.10046	5.68991	-1.42348	41.5769	27.7618	22.3207	46.9125	44.3951	38.0389
40	0.2	ml	4	1.63054	2.05377	0.322529	3.29323	4.24131	-1.06193	32.7001	23.5952	18.5427	36.7684	34.3038	30.6435
50	0.2	ml	4	1.55735	1.36134	0.607003	2.96615	3.62827	-0.686368	29.4841	21.0596	16.643	32.9789	30.6423	27.8775
60	0.2	ml	4	1.60491	2.30827	-0.234833	2.63707	3.29761	-0.266377	27.3315	19.2591	14.5963	30.5183	28.2213	26.0395
70	0.2	ml	4	0.190103	1.56227	-0.734979	0.856218	1.60311	-1.42221	24.8314	17.4322	14.0639	27.7011	25.4635	23.8314
80	0.2	ml	4	2.3403	2.09827	0.448689	3.20427	3.61847	0.799742	24.02	17.1342	13.4096	26.6543	24.6635	22.9655
90	0.2	ml	4	-0.305865	0.911188	-0.624322	0.165418	0.779718	-1.62121	21.1484	15.2499	12.568	23.6982	21.5397	20.4909
100	0.2	ml	4	1.62194	1.231	0.502484	2.3588	2.63101	0.338425	20.8468	14.9893	11.8011	23.2301	21.2812	20.108
5	0.3	ml	4	281.482	21.7593	25.1315	27.8515	9248.71	-8.93833	8003.6	89.6545	372.142	193.055	284802	86.2615
10	0.3	ml	4	23.4678	8.07446	7.14345	11.4514	97.871	-5.49106	522.984	52.595	202.356	110.43	2375.51	70.0051
20	0.3	ml	4	4.38433	3.05646	2.27	7.30354	10.4495	-1.57499	54.6881	34.907	33.5028	61.0842	61.396	46.6352
30	0.3	ml	4	2.27531	1.41808	1.3083	4.21751	5.972	-1.57423	40.6164	26.0823	25.3795	45.5405	43.678	36.4133
40	0.3	ml	4	1.9352	2.94409	-0.00596806	3.21859	4.5567	-0.825848	33.8117	24.2424	20.1016	37.8765	35.5696	31.3692
50	0.3	ml	4	1.9842	1.30998	0.924337	3.18258	4.09077	-0.384364	30.07	20.5911	19.1397	33.9447	31.352	28.1811
60	0.3	ml	4	1.16546	1.28849	0.364547	2.10428	2.86996	-0.779	27.1332	19.4778	16.5558	30.4278	28.0276	25.7779
70	0.3	ml	4	0.719281	0.521551	0.498378	1.466	2.17191	-1.02137	25.1164	17.4748	16.3193	28.302	25.8272	23.9409
80	0.3	ml	4	0.995164	1.30706	0.153569	1.66312	2.25192	-0.5205	23.3624	17.6435	14.2448	26.1447	23.921	22.4759
90	0.3	ml	4	1.64012	1.68897	0.292864	2.28116	2.76257	0.243853	21.8114	16.0134	13.3887	24.5112	22.3203	20.9723
100	0.3	ml	4	1.05858	1.14854	0.126402	1.58741	2.06007	-0.228378	21.1666	15.079	13.093	23.7729	21.5891	20.4203
5	0.4	ml	4	21.1398	21.6711	14.8552	32.1335	93.9156	-7.599	170.652	90.8277	133.331	195.731	489.69	86.9166
10	0.4	ml	4	10.1325	9.7329	6.46782	10.5872	29.8933	-5.49587	113.863	54.827	89.146	94.1774	219.857	60.4084
20	0.4	ml	4	5.50698	5.15924	2.31036	7.06454	11.8497	-1.0917	59.3893	36.3418	44.7064	62.0289	69.639	46.9314
30	0.4	ml	4	4.67567	2.35477	2.41133	5.83852	8.62917	0.097252	48.6412	28.6954	30.5009	49.7639	53.2869	40.0969
40	0.4	ml	4	4.02655	3.65279	1.05267	5.12323	6.77354	0.969958	37.3682	26.2272	23.5823	41.7746	39.5058	34.1949
50	0.4	ml	4	1.42126	0.2151	1.41651	2.41322	3.54426	-1.0591	32.7122	22.7978	21.2602	36.413	34.0783	30.5111
60	0.4	ml	4	0.389464	1.20471	0.0175266	0.977858	2.07808	-1.57155	27.1726	20.2748	18.4895	30.5356	28.0433	25.7737
70	0.4	ml	4	NaN	1.44535	0.132194	1.59473	2.63076	-0.636946	27.533	19.3126	17.8881	30.3849	28.3642	25.8998
80	0.4	ml	4	NaN	0.948679	0.679824	1.71833	2.5276	-0.391136	24.39	17.762	16.9733	26.8379	25.0697	22.8698
90	0.4	ml	4	NaN	0.293556	0.26171	0.503508	1.21379	-1.32154	22.4431	16.7341	15.397	25.1491	22.9106	21.5487
100	0.4	ml	4	NaN	1.4938	0.404585	2.12201	2.71213	0.354809	22.1926	16.0164	14.7846	25.0541	22.6699	21.323
5	0.5	ml	4	NaN	26.0686	63.3994	32.0454	1.14943e+06	-8.8707	370596	87.271	829.601	232.135	3.25559e+07	85.1356
10	0.5	ml	4	NaN	10.9712	11.0965	10.3776	35.9178	-5.23118	137.853	60.2921	101.247	102.812	228.701	64.4682
20	0.5	ml	4	NaN	1.84365	5.90456	4.89616	16.638	-2.91452	122.792	37.1214	71.0445	64.4282	179.432	49.0129
30	0.5	ml	4	NaN	3.89391	2.23028	3.24098	6.75703	-1.32229	39.992	33.0192	33.5651	43.931	43.3894	34.9389
40	0.5	ml	4	NaN	2.70923	1.00019	3.00548	5.36504	-0.576618	37.976	26.8306	27.1008	42.3983	40.1752	34.4709
50	0.5	ml	4	NaN	1.4948	0.454426	0.739701	2.55902	-1.95797	30.4521	23.7521	23.1905	34.1442	31.7342	28.3113
60	0.5	ml	4	NaN	0.990906	1.23627	1.52751	3.063	-0.903473	29.075	22.463	22.5992	32.2639	30.1728	26.9542
70	0.5	ml	4	NaN	1.16219	0.470397	1.12772	2.18164	-1.04229	24.9124	20.2118	18.4115	28.246	25.6137	23.7817
80	0.5	ml	4	NaN	1.70732	0.827991	2.08326	3.07652	0.135392	23.8273	19.2557	18.219	27.1018	24.4958	22.6459
90	0.5	ml	4	NaN	0.989521	1.18966	1.88825	2.70728	0.0396242	22.4246	18.6683	17.6519	25.3898	22.9769	21.4072
100	0.5	ml	4	NaN	1.0246	0.71432	1.3754	2.1821	-0.21353	21.588	17.6213	16.5491	24.4955	22.0518	20.688
5	0.6	ml	4	NaN	34.5707	69.4299	32.4601	374503	-7.03716	173395	89.047	683.117	210.251	1.10461e+07	67.3012
10	0.6	ml	4	NaN	12.6589	31.5347	17.2707	495.559	-1.10472	2891.03	60.6266	218.606	135.248	10088.9	77.3674
20	0.6	ml	4	NaN	6.00901	5.72985	5.37745	13.6242	-1.38377	61.6662	43.1874	53.4652	61.0347	72.4654	45.883
30	0.6	ml	4	NaN	3.91515	4.49361	3.64083	8.31934	-0.697887	44.2099	35.9422	41.121	46.8235	48.5121	37.0311
40	0.6	ml	4	NaN	2.82564	3.54035	3.77334	7.07907	0.421467	38.3628	29.8476	33.7975	41.8773	40.9823	33.609
50	0.6	ml	4	NaN	1.28094	2.41198	1.28597	3.6689	-1.25554	31.528	27.8112	28.3968	35.3077	32.979	29.005
60	0.6	ml	4	NaN	2.33908	0.565934	0.682324	2.79683	-1.14425	28.5118	24.4839	24.4128	32.2337	29.5724	26.5612
70	0.6	ml	4	NaN	2.20059	1.23807	1.95858	3.64023	0.13375	27.552	22.9644	22.989	30.9564	28.4797	25.7515
80	0.6	ml	4	NaN	2.38662	0.897474	1.48407	3.03672	-0.00298686	24.8018	22.8662	21.3735	27.8295	25.5151	23.3783
90	0.6	ml	4	NaN	1.09778	0.849511	0.561054	1.9316	-0.787863	23.283	20.2509	20.4652	26.4426	23.8539	22.0642
100	0.6	ml	4	NaN	1.33913	1.10937	1.67632	2.75548	0.253001	22.7284	18.9981	18.9602	25.7993	23.2642	21.5735
5	0.7	ml	4	NaN	62.0123	16.0926	41.7871	324.835	7.44848	550.331	109.302	176.492	236.666	4382.34	79.7165
10	0.7	ml	4	NaN	31.0771	70.867	18.4876	1.21282e+06	5.10812	2.94053e+06	79.3321	1059.81	114.683	3.76832e+07	69.6898
20	0.7	ml	4	NaN	12.2008	19.683	2.6576	170.862	-1.22192	2053.49	53.147	244.345	62.1875	4181.28	46.4565
30	0.7	ml	4	NaN	5.38445	7.9815	1.72534	11.0276	-1.07679	68.5204	42.7609	62.5615	48.1368	82.727	38.5072
40	0.7	ml	4	NaN	4.40582	5.12177	2.53603	7.81581	0.399127	41.7613	37.2523	42.4038	43.4975	44.9202	35.0992
50	0.7	ml	4	NaN	5.39243	1.86286	1.20768	5.09327	-0.0822168	32.3105	33.0139	33.1617	35.6919	34.0227	28.9403
60	0.7	ml	4	NaN	1.99874	4.4301	1.85157	5.0219	0.234705	31.797	30.5498	34.8313	34.0327	33.2794	28.2554
70	0.7	ml	4	NaN	1.89818	1.726	-0.962926	1.74615	-1.86354	25.341	27.7281	28.4905	28.8633	26.1551	23.6587
80	0.7	ml	4	NaN	1.57963	1.77304	-0.112555	2.12435	-1.08805	24.564	25.7264	25.9223	27.7103	25.2892	22.8855
90	0.7	ml	4	NaN	2.67251	1.67431	1.36979	3.34459	0.427133	24.1886	25.0625	24.5052	27.2472	24.8586	22.6786
100	0.7	ml	4	NaN	2.97874	2.19642	3.02431	4.43655	1.81087	22.3018	24.4581	21.7184	25.303	22.8855	21.1581
5	0.8	ml	4	NaN	119.758	15.5316	52.5767	13555.3	29.996	15027.9	160.72	298.396	239.136	342827	74.501
10	0.8	ml	4	NaN	59.2668	43.5789	14.8322	1168.45	11.7826	6165.21	109.409	328.305	113.335	30640	67.5544
20	0.8	ml	4	NaN	28.7712	24.6997	3.6969	50.0618	4.93846	231.511	75.4067	168.935	63.771	365.685	47.3377
30	0.8	ml	4	NaN	15.6252	35.4181	0.72602	814.228	1.84721	12518.7	61.6937	499.548	52.6578	24725.9	42.5518
40	0.8	ml	4	NaN	14.2907	6.91627	-0.793634	12.4588	0.770951	107.816	52.5237	77.0684	41.0397	132.797	33.3411
50	0.8	ml	4	NaN	9.20677	6.79509	1.22216	9.12728	1.63663	49.1522	44.8027	57.9475	38.0773	54.5693	31.5234
60	0.8	ml	4	NaN	6.92123	7.92243	1.99543	7.76447	2.09618	33.9207	43.284	64.6814	34.7118	35.882	29.2604
70	0.8	ml	4	NaN	5.00286	5.29591	0.029409	4.86223	0.373239	29.3494	38.8024	40.2429	30.7361	30.6306	25.5417
80	0.8	ml	4	NaN	4.34502	5.16064	0.241704	4.20044	0.39462	25.01	37.3274	37.7636	27.2398	25.8721	22.9493
90	0.8	ml	4	NaN	3.9546	3.4098	0.212463	3.37132	0.220845	23.5282	33.8014	30.9266	25.9986	24.1949	21.9363
100	0.8	ml	4	NaN	3.29862	3.08803	-0.380067	2.59122	-0.237309	21.3348	33.0439	29.0887	23.9873	21.8731	19.9624
5	0.9	ml	4	NaN	264.539	0.135339	103.553	899.227	97.5231	1446.16	309.265	181.614	272.36	11901.2	114.534
10	0.9	ml	4	NaN	168.647	51.4435	38.1151	5459.65	57.8754	17188.3	234.786	494.041	128.805	83774.4	89.56
20	0.9	ml	4	NaN	99.2504	64.7803	6.50049	2609.36	27.2941	18945.9	170.603	608.716	57.4003	46953	56.919
30	0.9	ml	4	NaN	67.7207	63.7118	-0.042811	12229.9	16.0617	172508	134.94	805.026	47.3189	375034	46.5566
40	0.9	ml	4	NaN	50.6958	46.3011	-2.44105	132.262	10.9845	1677.76	117.936	396.442	45.4153	2582.79	45.9957
50	0.9	ml	4	NaN	39.9161	31.2311	-2.34229	65.4788	8.58779	930.428	103.462	316.252	38.2133	1311.99	36.839
60	0.9	ml	4	NaN	29.1886	15.7763	-1.13738	21.299	6.92099	161.029	87.9507	136.911	34.8358	196.632	33.3091
70	0.9	ml	4	NaN	27.225	33.8219	-2.44253	360.768	4.76421	8002.88	78.4833	610.664	29.7468	10916.3	28.3301
80	0.9	ml	4	NaN	23.0584	10.365	-3.00369	8.73487	3.28645	30.0774	71.9095	91.1802	27.0919	31.4209	26.0974
90	0.9	ml	4	NaN	21.8425	8.91202	-1.21067	11.0594	4.75426	48.8794	68.939	79.9925	27.5432	52.3956	25.62
100	0.9	ml	4	NaN	16.6658	8.17914	-1.81171	7.25998	2.80835	30.2544	61.6143	67.8948	25.7487	31.5382	24.1158
5	0.1	ml	5	NaN	28.8278	-0.12476	47.9658	335.152	-11.0331	651.498	105.011	110.478	304.072	5613.18	114.86
10	0.1	ml	5	NaN	16.38	-0.935406	19.064	32.5057	-6.0996	106.612	68.8207	45.0102	108.542	147.387	71.0278
20	0.1	ml	5	NaN	6.54702	-0.663793	9.60445	14.6913	-3.39281	72.5687	41.2696	28.992	70.5701	83.5682	56.3199
30	0.1	ml	5	NaN	3.50602	-1.10963	3.97147	6.85731	-4.50402	53.6914	32.4344	23.2701	54.1958	58.1652	46.3443
40	0.1	ml	5	NaN	2.77255	-0.257203	3.87593	6.0863	-2.83538	44.009	27.0619	20.6434	43.9372	46.8358	38.6531
50	0.1	ml	5	NaN	1.47316	-0.863087	1.16758	2.67975	-4.24503	36.88	23.568	17.5097	37.254	38.5397	33.6022
60	0.1	ml	5	NaN	1.55003	0.00784617	2.7657	4.0548	-2.12	34.3536	21.5316	16.5178	34.9943	35.7224	31.5614
70	0.1	ml	5	NaN	1.74412	0.801883	3.7842	4.81871	-0.714848	30.8501	19.969	14.8511	31.3482	31.9887	28.3831
80	0.1	ml	5	NaN	1.89939	0.434548	3.38039	4.36885	-0.610415	29.828	18.8769	14.4169	30.1374	30.7934	27.5183
90	0.1	ml	5	NaN	1.78709	-0.401337	2.00769	2.77317	-1.58475	27.7378	17.646	12.6767	28.1692	28.4564	25.9848
100	0.1	ml	5	NaN	0.905709	0.547584	2.43593	3.20478	-0.968683	26.225	16.5587	12.9564	26.5669	26.885	24.5017
5	0.2	ml	5	NaN	30.7408	16.5382	69.5226	2567.59	-6.19316	3715.53	119.093	244.851	495.456	48121.2	141.885
10	0.2	ml	5	NaN	14.3556	0.59104	18.1147	60.7577	-7.14383	433.177	66.5874	57.3537	131.791	939.694	82.8385
20	0.2	ml	5	NaN	6.63019	0.0703738	9.15042	14.8052	-3.56446	70.0802	40.4968	31.8943	69.7431	80.4874	55.1869
30	0.2	ml	5	NaN	3.495	1.046	6.97231	10.8006	-1.866	58.0392	31.7282	26.8234	57.3002	63.4761	48.4595
40	0.2	ml	5	NaN	3.08395	0.973523	5.68467	8.06378	-1.24338	44.3151	28.4107	21.849	44.561	47.2749	38.8828
50	0.2	ml	5	NaN	1.60047	1.04716	4.24954	6.12708	-1.47195	39.4145	24.2721	19.5477	39.3826	41.4925	35.104
60	0.2	ml	5	NaN	2.42821	0.0807737	3.51012	4.99242	-1.31689	36.0308	22.6704	17.2944	36.2223	37.5535	32.6883
70	0.2	ml	5	NaN	1.53496	-0.919267	0.674293	1.98405	-3.32853	32.2355	20.2687	16.3629	32.2604	33.2848	29.653
80	0.2	ml	5	NaN	2.46926	0.685218	4.08272	5.28337	0.146367	31.803	20.0588	15.7488	31.571	32.8936	28.9153
90	0.2	ml	5	NaN	0.944143	-0.570878	0.450307	1.45263	-2.90466	27.3629	17.4836	14.5374	27.7571	28.0326	25.6301
100	0.2	ml	5	NaN	1.7168	0.461902	2.88433	3.76553	-0.452092	27.0605	17.6995	13.6645	27.2596	27.7703	25.1278
5	0.3	ml	5	NaN	28.1534	49.0208	36.082	1.37262e+06	-16.3589	348673	110.808	741.111	222.512	4.32571e+07	93.486
10	0.3	ml	5	NaN	12.724	15.6783	21.6538	3191.52	-5.35668	12678.8	64.1483	388.584	146.582	99206	90.5387
20	0.3	ml	5	NaN	4.42491	4.2113	11.6365	20.4371	-1.71917	81.9867	41.3384	41.1815	75.0904	96.5681	59.2597
30	0.3	ml	5	NaN	2.21994	2.86778	8.20216	13.5107	-0.730064	64.8719	30.9636	31.1863	58.6361	72.0441	49.8824
40	0.3	ml	5	NaN	3.84911	0.126166	4.61888	7.59497	-1.84911	46.9102	28.0519	23.8597	45.9126	50.1765	40.2477
50	0.3	ml	5	NaN	2.25979	1.70203	5.36194	7.80216	-0.237014	40.5319	24.4109	22.5253	40.2806	42.8494	35.5695
60	0.3	ml	5	NaN	2.35799	0.836596	3.9854	5.83516	-0.754365	36.5036	23.0322	19.5097	36.4241	38.1478	32.7687
70	0.3	ml	5	NaN	1.14577	0.542762	2.33689	4.11394	-1.68859	34.5903	20.3628	19.1608	34.1592	35.8999	31.158
80	0.3	ml	5	NaN	1.78537	0.388324	2.57783	3.88804	-1.1681	30.4347	20.5348	16.6784	30.644	31.4091	28.009
90	0.3	ml	5	NaN	1.99626	0.783563	3.45955	4.64265	-0.0612994	29.266	18.9369	15.8017	29.3672	30.1594	26.8769
100	0.3	ml	5	NaN	1.49142	0.668984	2.99076	4.11805	-0.243047	28.6377	17.4596	15.5242	28.7322	29.4142	26.4042
5	0.4	ml	5	NaN	30.7077	27.8973	54.7692	414.191	-9.99916	497.185	116.427	203.094	293.979	3164.72	110.441
10	0.4	ml	5	NaN	11.4333	16.3307	22.7895	160.615	-5.10095	727.46	66.4892	139.928	146.648	1987.06	88.5096
20	0.4	ml	5	NaN	6.42979	3.2342	9.81801	22.8887	-2.61855	122.114	42.4596	58.0501	77.1479	172.427	60.8984
30	0.4	ml	5	NaN	3.495	2.50135	6.56451	13.273	-1.7006	71.4929	33.5713	35.4217	56.5663	81.182	48.4729
40	0.4	ml	5	NaN	5.27691	1.59488	7.60553	11.6758	1.1392	53.8661	31.3185	28.0193	51.3912	57.9464	44.8932
50	0.4	ml	5	NaN	0.784591	1.69079	3.50733	6.56591	-1.72542	45.2813	26.5252	25.0702	43.6286	47.8209	39.1785
60	0.4	ml	5	NaN	1.81833	0.519406	2.39155	4.62593	-2.02185	37.2266	23.6454	21.6597	36.4014	38.9098	32.9439
70	0.4	ml	5	NaN	1.95929	0.946287	3.45849	5.68357	-0.475313	38.0734	22.5969	21.3752	36.2946	39.6523	33.2877
80	0.4	ml	5	NaN	1.43089	1.32229	3.07057	4.96898	-0.526935	34.1392	21.1434	19.853	31.5897	35.4671	29.196
90	0.4	ml	5	NaN	0.817624	0.245272	0.863634	2.36222	-2.31099	29.5658	19.7103	17.9156	29.2102	30.3912	27.0579
100	0.4	ml	5	NaN	2.18223	0.505135	2.93269	4.32824	-0.110157	29.3704	18.8703	17.3023	29.3939	30.1822	26.9667
5	0.5	ml	5	NaN	37.7876	208.201	66.8768	7631117312	-10.6729	3.14611e+08	113.318	2808.74	430.905	213106000000	115.764
10	0.5	ml	5	NaN	16.1679	15.2216	15.0468	83.3548	-8.541	270.346	71.4819	139.183	116.804	658.566	73.5487
20	0.5	ml	5	NaN	4.20865	8.54642	8.54149	71.9831	-3.09958	753.418	43.4141	105.691	81.6068	1381.51	65.8758
30	0.5	ml	5	NaN	6.38364	3.41296	6.42839	14.0337	-1.09819	61.8065	39.3965	40.6574	54.4966	69.3665	46.0623
40	0.5	ml	5	NaN	3.36354	2.43918	5.48498	10.4634	-0.502661	53.286	31.6754	31.9383	50.3341	57.4069	44.0049
50	0.5	ml	5	NaN	2.15169	1.3187	2.22371	5.86508	-2.47797	42.8184	27.8377	27.7469	40.6541	45.3412	36.4689
60	0.5	ml	5	NaN	1.47324	1.54573	2.00115	5.37959	-1.94167	40.9685	26.1759	26.6776	38.0397	43.048	34.7026
70	0.5	ml	5	NaN	2.06657	0.301515	1.29304	3.42847	-2.34852	32.6661	23.7677	21.3743	32.6172	33.8787	29.604
80	0.5	ml	5	NaN	2.36781	0.904069	2.57982	4.71497	-0.714582	32.3008	22.268	21.2991	32.0507	33.4494	29.0968
90	0.5	ml	5	NaN	1.89475	1.42177	2.72375	4.67389	-0.344198	29.8431	21.6972	20.7561	29.5537	30.8157	26.9665
100	0.5	ml	5	NaN	1.26738	0.885234	1.6913	3.39048	-1.1269	28.9053	20.2784	19.0858	28.6425	29.6998	26.3781
5	0.6	ml	5	NaN	47.2211	75.6279	46.2517	202459	-11.9415	87288.5	114.784	631.321	245.755	4.69467e+06	83.7526
10	0.6	ml	5	NaN	19.1225	50.0741	27.8229	12464.6	-1.49266	57809.7	75.6445	372.182	191.099	316031	108.086
20	0.6	ml	5	NaN	8.21612	9.15183	9.24031	28.445	-1.84876	110.876	51.5823	66.8227	73.3992	142.058	57.969
30	0.6	ml	5	NaN	5.15266	7.03848	5.79857	17.0372	-1.16507	75.108	41.8744	52.1029	56.6367	86.6011	48.1682
40	0.6	ml	5	NaN	4.38607	4.23606	4.89688	12.2551	-0.257427	58.6249	35.1826	40.0957	50.3156	64.0304	44.2258
50	0.6	ml	5	NaN	2.45351	2.79839	1.94231	6.8139	-2.22168	44.3535	32.1149	33.3395	41.6917	47.1203	37.162
60	0.6	ml	5	NaN	3.69466	1.06882	1.94369	5.75243	-1.57494	39.2376	28.5742	28.7193	37.6917	41.2096	33.8424
70	0.6	ml	5	NaN	3.15819	1.63743	2.97709	6.18991	-0.327036	37.8893	26.7776	26.3485	36.3324	39.528	33.0431
80	0.6	ml	5	NaN	2.95864	1.76311	2.74365	5.67749	-0.187849	34.5194	26.2998	25.2391	32.8764	35.8625	30.1653
90	0.6	ml	5	NaN	1.24927	1.50759	1.2282	3.83014	-1.41461	32.4149	23.2301	23.8917	31.1627	33.4741	28.7432
100	0.6	ml	5	NaN	2.25551	1.56705	2.88277	5.15796	0.289563	31.3435	22.3232	22.0509	30.3168	32.3112	27.9356
5	0.7	ml	5	NaN	78.4551	25.3611	63.9599	3658.61	2.15093	4604.82	136.678	240.78	374.319	90120.4	105.359
10	0.7	ml	5	NaN	40.0457	152.978	26.4063	1591953387	2.48517	1596479602	96.5167	2622.72	151.144	49555124919	90.187
20	0.7	ml	5	NaN	16.2164	33.9326	5.02863	5504.63	-3.03131	60346.2	62.5975	447.765	76.6113	157427	60.6699
30	0.7	ml	5	NaN	8.07266	11.5342	3.74381	34.1981	-1.48727	289.708	49.687	86.8454	58.8119	396.447	51.0358
40	0.7	ml	5	NaN	5.8291	7.06655	4.15744	14.9248	0.116625	68.1504	42.7247	51.064	52.1595	75.3874	46.3243
50	0.7	ml	5	NaN	6.96073	3.50796	2.64046	9.88984	-0.45614	50.1852	38.7704	40.6813	42.652	53.9466	38.2568
60	0.7	ml	5	NaN	2.6164	6.70476	3.55376	10.5744	0.604649	50.4402	35.1691	43.1986	40.8696	53.822	37.5436
70	0.7	ml	5	NaN	2.67604	3.08719	-0.0992732	4.81934	-2.39601	37.4846	32.2478	34.7438	34.3176	39.2594	31.3224
80	0.7	ml	5	NaN	3.19727	2.31081	0.632781	4.83384	-1.48305	35.9804	30.6123	30.9999	32.9995	37.4537	30.3966
90	0.7	ml	5	NaN	4.07403	2.15536	2.14524	5.84729	0.0818884	34.4948	29.4073	29.0499	32.1086	35.7651	29.6337
100	0.7	ml	5	NaN	4.02309	2.70259	3.54029	6.44362	1.31396	30.2501	28.4681	25.6879	29.3209	31.262	26.7995
5	0.8	ml	5	NaN	153.658	46.6835	87.243	1.29178e+06	25.9411	487929	209.085	569.149	397.897	3.28735e+07	94.6685
10	0.8	ml	5	NaN	75.0256	122.04	29.176	1.83876e+07	10.9389	3.19556e+07	136.021	1386.77	180.851	5.42577e+08	98.7533
20	0.8	ml	5	NaN	37.4313	44.3533	9.15845	441.115	4.97925	3299.08	91.9683	286.955	80.003	6572.6	62.5849
30	0.8	ml	5	NaN	22.5579	64.4859	3.19591	126409	1.72886	1.59311e+06	74.0776	1092.44	64.717	3.98782e+06	56.7372
40	0.8	ml	5	NaN	19.3681	11.0554	0.535324	48.1933	-0.322782	755.539	63.1441	109.915	47.9035	1016.43	42.1663
50	0.8	ml	5	NaN	12.8206	10.4808	2.24484	20.9104	1.15765	170.7	53.3724	78.6683	44.8172	205.27	40.4352
60	0.8	ml	5	NaN	11.6769	9.43287	2.62918	14.5518	1.81914	69.7495	51.7582	93.4119	41.9252	79.5455	38.7528
70	0.8	ml	5	NaN	7.91091	6.98391	0.962085	9.99796	0.30287	49.5066	45.3092	49.5574	36.293	52.7072	33.6474
80	0.8	ml	5	NaN	5.48785	6.89022	0.285642	7.20227	-0.669162	37.3575	42.5596	45.8492	31.4911	39.2397	29.2524
90	0.8	ml	5	NaN	4.8688	5.63296	1.265	6.83764	0.199054	34.4973	39.5721	37.3948	30.7716	35.9169	28.5977
100	0.8	ml	5	NaN	4.98115	3.95247	0.0904502	5.06101	-0.730282	31.3948	38.0642	34.3003	28.5815	32.5245	26.3684
5	0.9	ml	5	NaN	359.739	10.4906	144.141	14037.8	97.6791	14632.5	421.478	279.147	420.294	257280	127.283
10	0.9	ml	5	NaN	231.71	79.8629	44.5272	336995	53.9158	731844	319.422	841.189	155.358	6.28588e+06	97.2968
20	0.9	ml	5	NaN	131.105	131.177	8.30381	260589	22.9339	1.49657e+06	224.169	1246.06	69.3783	5.10112e+06	61.9942
30	0.9	ml	5	NaN	91.6286	126.549	1.73791	5.26598e+06	13.9666	5.71173e+07	175.884	1867.21	57.5401	1.62872e+08	53.4426
40	0.9	ml	5	NaN	70.1101	88.9058	-1.36942	5765.27	9.44131	90963.6	154.743	776.097	56.4869	163377	56.407
50	0.9	ml	5	NaN	55.9069	49.5133	-1.30829	2383.55	7.58278	45640.1	133.46	615.865	45.1548	72622.5	43.0848
60	0.9	ml	5	NaN	37.656	28.7585	-1.03786	128.803	5.27976	2367.73	109.41	233.761	40.0011	3126.03	39.337
70	0.9	ml	5	NaN	34.0651	70.5749	-2.48152	62875.8	2.58446	1.30608e+06	95.1119	1388.07	35.4875	1.98502e+06	33.5965
80	0.9	ml	5	NaN	30.8703	17.0648	-2.33672	16.6507	2.11109	65.0663	88.2156	132.049	32.2071	71.5042	30.6068
90	0.9	ml	5	NaN	30.6143	11.7306	-0.942917	18.8085	3.71426	130.469	85.3179	100.799	32.7394	143.677	31.3958
100	0.9	ml	5	NaN	22.0905	13.7532	-1.21273	14.4237	2.18198	79.7191	75.2291	94.2931	29.8859	86.853	28.5353
5	0.1	km	2	3.77301	NaN	NaN	NaN	NaN	NaN	35.2743	NaN	NaN	NaN	NaN	NaN
10	0.1	km	2	2.24688	NaN	NaN	NaN	NaN	NaN	24.6123	NaN	NaN	NaN	NaN	NaN
20	0.1	km	2	1.57178	NaN	NaN	22.5419	NaN	NaN	17.7485	NaN	NaN	53.8787	NaN	NaN
30	0.1	km	2	0.974986	NaN	NaN	17.75	NaN	NaN	14.1936	NaN	NaN	38.7631	NaN	NaN
40	0.1	km	2	1.16928	NaN	NaN	10.2289	NaN	NaN	12.3715	NaN	NaN	31.3495	NaN	NaN
50	0.1	km	2	0.628396	NaN	NaN	9.60887	NaN	NaN	10.7361	NaN	NaN	26.5239	NaN	NaN
60	0.1	km	2	0.764432	NaN	NaN	5.82469	NaN	NaN	10.1221	NaN	NaN	22.4087	NaN	NaN
70	0.1	km	2	1.19059	NaN	NaN	7.0288	NaN	NaN	9.1086	NaN	NaN	20.838	NaN	NaN
80	0.1	km	2	1.39244	NaN	NaN	5.31601	NaN	NaN	8.83183	NaN	NaN	18.3135	NaN	NaN
90	0.1	km	2	1.16775	NaN	NaN	4.79037	NaN	NaN	8.27597	NaN	NaN	18.0701	NaN	NaN
100	0.1	km	2	1.09972	NaN	NaN	5.25114	NaN	NaN	8.10168	NaN	NaN	17.3816	NaN	NaN
5	0.2	km	2	9.28722	NaN	NaN	NaN	NaN	NaN	39.2669	NaN	NaN	NaN	NaN	NaN
10	0.2	km	2	6.0689	NaN	NaN	NaN	NaN	NaN	24.5719	NaN	NaN	NaN	NaN	NaN
20	0.2	km	2	3.83712	NaN	NaN	24.6914	NaN	NaN	17.5496	NaN	NaN	57.2861	NaN	NaN
30	0.2	km	2	3.05419	NaN	NaN	18.4355	NaN	NaN	14.1587	NaN	NaN	39.4303	NaN	NaN
40	0.2	km	2	3.3784	NaN	NaN	11.5585	NaN	NaN	12.4463	NaN	NaN	29.6333	NaN	NaN
50	0.2	km	2	3.14519	NaN	NaN	9.34106	NaN	NaN	11.2769	NaN	NaN	25.4235	NaN	NaN
60	0.2	km	2	3.31148	NaN	NaN	6.8865	NaN	NaN	10.647	NaN	NaN	22.3995	NaN	NaN
70	0.2	km	2	2.55906	NaN	NaN	4.99522	NaN	NaN	9.22787	NaN	NaN	18.8487	NaN	NaN
80	0.2	km	2	3.19976	NaN	NaN	5.09677	NaN	NaN	9.07038	NaN	NaN	18.7883	NaN	NaN
90	0.2	km	2	2.47792	NaN	NaN	3.84183	NaN	NaN	8.37903	NaN	NaN	16.7628	NaN	NaN
100	0.2	km	2	3.01646	NaN	NaN	4.85481	NaN	NaN	8.20645	NaN	NaN	16.5355	NaN	NaN
5	0.3	km	2	13.9439	NaN	NaN	NaN	NaN	NaN	41.4311	NaN	NaN	NaN	NaN	NaN
10	0.3	km	2	8.2979	NaN	NaN	NaN	NaN	NaN	25.5225	NaN	NaN	NaN	NaN	NaN
20	0.3	km	2	6.87424	NaN	NaN	25.2941	NaN	NaN	18.3541	NaN	NaN	56.2414	NaN	NaN
30	0.3	km	2	6.39414	NaN	NaN	19.0114	NaN	NaN	15.111	NaN	NaN	41.4878	NaN	NaN
40	0.3	km	2	6.14274	NaN	NaN	10.2325	NaN	NaN	13.3665	NaN	NaN	29.1978	NaN	NaN
50	0.3	km	2	5.89104	NaN	NaN	9.15027	NaN	NaN	12.0021	NaN	NaN	25.7405	NaN	NaN
60	0.3	km	2	5.50842	NaN	NaN	5.98114	NaN	NaN	10.9619	NaN	NaN	21.4618	NaN	NaN
70	0.3	km	2	5.48934	NaN	NaN	5.5405	NaN	NaN	10.5564	NaN	NaN	19.8638	NaN	NaN
80	0.3	km	2	5.92874	NaN	NaN	4.8057	NaN	NaN	10.5942	NaN	NaN	18.9663	NaN	NaN
90	0.3	km	2	6.0077	NaN	NaN	5.01725	NaN	NaN	9.75631	NaN	NaN	17.2192	NaN	NaN
100	0.3	km	2	5.9392	NaN	NaN	4.70677	NaN	NaN	9.62914	NaN	NaN	16.3593	NaN	NaN
5	0.4	km	2	23.1389	NaN	NaN	NaN	NaN	NaN	44.7575	NaN	NaN	NaN	NaN	NaN
10	0.4	km	2	14.7303	NaN	NaN	NaN	NaN	NaN	28.2936	NaN	NaN	NaN	NaN	NaN
20	0.4	km	2	12.3046	NaN	NaN	26.4354	NaN	NaN	20.5042	NaN	NaN	60.8997	NaN	NaN
30	0.4	km	2	11.3183	NaN	NaN	20.6212	NaN	NaN	17.3986	NaN	NaN	41.1851	NaN	NaN
40	0.4	km	2	10.884	NaN	NaN	10.7358	NaN	NaN	15.8336	NaN	NaN	29.3572	NaN	NaN
50	0.4	km	2	10.1291	NaN	NaN	10.0047	NaN	NaN	14.5602	NaN	NaN	27.6729	NaN	NaN
60	0.4	km	2	9.98812	NaN	NaN	6.41932	NaN	NaN	13.7159	NaN	NaN	22.8182	NaN	NaN
70	0.4	km	2	10.0803	NaN	NaN	6.42901	NaN	NaN	13.5031	NaN	NaN	20.2414	NaN	NaN
80	0.4	km	2	10.0113	NaN	NaN	5.76907	NaN	NaN	12.811	NaN	NaN	19.5382	NaN	NaN
90	0.4	km	2	9.26767	NaN	NaN	3.7998	NaN	NaN	11.9771	NaN	NaN	17.4787	NaN	NaN
100	0.4	km	2	9.87044	NaN	NaN	4.22335	NaN	NaN	12.3278	NaN	NaN	16.8606	NaN	NaN
5	0.5	km	2	35.9762	NaN	NaN	NaN	NaN	NaN	59.5833	NaN	NaN	NaN	NaN	NaN
10	0.5	km	2	22.7964	NaN	NaN	NaN	NaN	NaN	33.0455	NaN	NaN	NaN	NaN	NaN
20	0.5	km	2	17.9118	NaN	NaN	23.4289	NaN	NaN	24.0466	NaN	NaN	55.0656	NaN	NaN
30	0.5	km	2	17.3151	NaN	NaN	18.3953	NaN	NaN	21.0928	NaN	NaN	38.3001	NaN	NaN
40	0.5	km	2	16.7827	NaN	NaN	10.3101	NaN	NaN	20.3395	NaN	NaN	30.9407	NaN	NaN
50	0.5	km	2	16.005	NaN	NaN	7.73183	NaN	NaN	18.6892	NaN	NaN	24.1031	NaN	NaN
60	0.5	km	2	15.9708	NaN	NaN	6.30564	NaN	NaN	18.262	NaN	NaN	21.7529	NaN	NaN
70	0.5	km	2	15.806	NaN	NaN	6.85528	NaN	NaN	17.8877	NaN	NaN	20.4255	NaN	NaN
80	0.5	km	2	15.8934	NaN	NaN	4.93507	NaN	NaN	17.5576	NaN	NaN	17.9841	NaN	NaN
90	0.5	km	2	15.7956	NaN	NaN	4.71084	NaN	NaN	17.3649	NaN	NaN	16.8115	NaN	NaN
100	0.5	km	2	15.7609	NaN	NaN	3.93962	NaN	NaN	17.311	NaN	NaN	16.8254	NaN	NaN
5	0.6	km	2	55.6954	NaN	NaN	NaN	NaN	NaN	86.841	NaN	NaN	NaN	NaN	NaN
10	0.6	km	2	38.7911	NaN	NaN	NaN	NaN	NaN	50.7947	NaN	NaN	NaN	NaN	NaN
20	0.6	km	2	29.1823	NaN	NaN	23.2475	NaN	NaN	33.3342	NaN	NaN	57.5584	NaN	NaN
30	0.6	km	2	27.1172	NaN	NaN	18.5529	NaN	NaN	29.7127	NaN	NaN	39.2069	NaN	NaN
40	0.6	km	2	26.3186	NaN	NaN	11.2641	NaN	NaN	28.3032	NaN	NaN	31.233	NaN	NaN
50	0.6	km	2	25.2518	NaN	NaN	8.84681	NaN	NaN	26.9883	NaN	NaN	24.4769	NaN	NaN
60	0.6	km	2	24.6027	NaN	NaN	6.13962	NaN	NaN	26.0529	NaN	NaN	22.845	NaN	NaN
70	0.6	km	2	24.5691	NaN	NaN	5.56883	NaN	NaN	25.7622	NaN	NaN	20.018	NaN	NaN
80	0.6	km	2	24.765	NaN	NaN	5.44263	NaN	NaN	25.8794	NaN	NaN	19.1142	NaN	NaN
90	0.6	km	2	24.4337	NaN	NaN	4.32624	NaN	NaN	25.4226	NaN	NaN	17.467	NaN	NaN
100	0.6	km	2	24.4153	NaN	NaN	3.82118	NaN	NaN	25.319	NaN	NaN	16.5613	NaN	NaN
5	0.7	km	2	75.1541	NaN	NaN	NaN	NaN	NaN	94.6678	NaN	NaN	NaN	NaN	NaN
10	0.7	km	2	60.721	NaN	NaN	NaN	NaN	NaN	75.9404	NaN	NaN	NaN	NaN	NaN
20	0.7	km	2	45.636	NaN	NaN	22.5932	NaN	NaN	49.8151	NaN	NaN	54.828	NaN	NaN
30	0.7	km	2	41.5875	NaN	NaN	19.141	NaN	NaN	43.4293	NaN	NaN	41.1689	NaN	NaN
40	0.7	km	2	40.1353	NaN	NaN	10.8282	NaN	NaN	41.4699	NaN	NaN	30.5077	NaN	NaN
50	0.7	km	2	39.1335	NaN	NaN	7.86467	NaN	NaN	40.1555	NaN	NaN	24.3102	NaN	NaN
60	0.7	km	2	38.704	NaN	NaN	6.88474	NaN	NaN	39.578	NaN	NaN	22.7726	NaN	NaN
70	0.7	km	2	38.0317	NaN	NaN	5.56034	NaN	NaN	38.7281	NaN	NaN	20.1625	NaN	NaN
80	0.7	km	2	37.4294	NaN	NaN	4.13081	NaN	NaN	38.0142	NaN	NaN	17.9012	NaN	NaN
90	0.7	km	2	37.6228	NaN	NaN	4.67309	NaN	NaN	38.2153	NaN	NaN	17.3941	NaN	NaN
100	0.7	km	2	38.0976	NaN	NaN	5.11104	NaN	NaN	38.6015	NaN	NaN	16.7507	NaN	NaN
5	0.8	km	2	109.796	NaN	NaN	NaN	NaN	NaN	133.019	NaN	NaN	NaN	NaN	NaN
10	0.8	km	2	96.2421	NaN	NaN	NaN	NaN	NaN	111.455	NaN	NaN	NaN	NaN	NaN
20	0.8	km	2	76.2732	NaN	NaN	24.6838	NaN	NaN	82.212	NaN	NaN	54.2691	NaN	NaN
30	0.8	km	2	69.3488	NaN	NaN	18.2366	NaN	NaN	72.5963	NaN	NaN	38.5977	NaN	NaN
40	0.8	km	2	65.2603	NaN	NaN	9.8644	NaN	NaN	66.792	NaN	NaN	30.4214	NaN	NaN
50	0.8	km	2	63.6435	NaN	NaN	9.8258	NaN	NaN	64.4859	NaN	NaN	26.4567	NaN	NaN
60	0.8	km	2	62.1837	NaN	NaN	6.76316	NaN	NaN	62.8241	NaN	NaN	22.5549	NaN	NaN
70	0.8	km	2	61.1401	NaN	NaN	6.26369	NaN	NaN	61.6498	NaN	NaN	20.3597	NaN	NaN
80	0.8	km	2	60.9329	NaN	NaN	5.42229	NaN	NaN	61.3628	NaN	NaN	18.3544	NaN	NaN
90	0.8	km	2	60.3946	NaN	NaN	4.86148	NaN	NaN	60.7433	NaN	NaN	16.7147	NaN	NaN
100	0.8	km	2	59.7555	NaN	NaN	3.72174	NaN	NaN	60.05	NaN	NaN	15.9472	NaN	NaN
5	0.9	km	2	172.346	NaN	NaN	NaN	NaN	NaN	194.885	NaN	NaN	NaN	NaN	NaN
10	0.9	km	2	159.601	NaN	NaN	NaN	NaN	NaN	180.738	NaN	NaN	NaN	NaN	NaN
20	0.9	km	2	141.96	NaN	NaN	31.8098	NaN	NaN	154.189	NaN	NaN	61.1762	NaN	NaN
30	0.9	km	2	133.308	NaN	NaN	21.9586	NaN	NaN	144.56	NaN	NaN	41.0158	NaN	NaN
40	0.9	km	2	123.497	NaN	NaN	9.62094	NaN	NaN	128.909	NaN	NaN	28.4112	NaN	NaN
50	0.9	km	2	117.959	NaN	NaN	9.05889	NaN	NaN	121.035	NaN	NaN	25.5052	NaN	NaN
60	0.9	km	2	113.878	NaN	NaN	6.93186	NaN	NaN	115.57	NaN	NaN	22.136	NaN	NaN
70	0.9	km	2	111.764	NaN	NaN	5.93301	NaN	NaN	114.273	NaN	NaN	19.4037	NaN	NaN
80	0.9	km	2	110.526	NaN	NaN	4.18081	NaN	NaN	111.8	NaN	NaN	18.0132	NaN	NaN
90	0.9	km	2	108.304	NaN	NaN	4.95804	NaN	NaN	108.87	NaN	NaN	17.2339	NaN	NaN
100	0.9	km	2	108.212	NaN	NaN	3.58115	NaN	NaN	108.794	NaN	NaN	16.22	NaN	NaN
5	0.1	km	3	5.73162	NaN	NaN	NaN	NaN	NaN	72.0621	NaN	NaN	NaN	NaN	NaN
10	0.1	km	3	1.85341	NaN	NaN	NaN	NaN	NaN	47.4177	NaN	NaN	NaN	NaN	NaN
20	0.1	km	3	1.0754	NaN	NaN	49.2545	NaN	NaN	34.5506	NaN	NaN	118.824	NaN	NaN
30	0.1	km	3	0.217732	NaN	NaN	38.1005	NaN	NaN	27.311	NaN	NaN	80.714	NaN	NaN
40	0.1	km	3	0.50245	NaN	NaN	19.9813	NaN	NaN	24.8379	NaN	NaN	59.2319	NaN	NaN
50	0.1	km	3	0.0527379	NaN	NaN	18.6571	NaN	NaN	21.2293	NaN	NaN	47.9713	NaN	NaN
60	0.1	km	3	0.0802635	NaN	NaN	12.1197	NaN	NaN	19.7753	NaN	NaN	40.1999	NaN	NaN
70	0.1	km	3	0.822175	NaN	NaN	13.2454	NaN	NaN	17.8522	NaN	NaN	36.6706	NaN	NaN
80	0.1	km	3	1.14821	NaN	NaN	9.90135	NaN	NaN	16.9601	NaN	NaN	31.0413	NaN	NaN
90	0.1	km	3	0.598478	NaN	NaN	8.65916	NaN	NaN	16.218	NaN	NaN	30.6904	NaN	NaN
100	0.1	km	3	1.05171	NaN	NaN	9.38503	NaN	NaN	15.7877	NaN	NaN	28.743	NaN	NaN
5	0.2	km	3	10.2805	NaN	NaN	NaN	NaN	NaN	86.9397	NaN	NaN	NaN	NaN	NaN
10	0.2	km	3	5.44802	NaN	NaN	NaN	NaN	NaN	46.6242	NaN	NaN	NaN	NaN	NaN
20	0.2	km	3	3.69006	NaN	NaN	53.9351	NaN	NaN	34.3407	NaN	NaN	128.173	NaN	NaN
30	0.2	km	3	2.15588	NaN	NaN	39.6967	NaN	NaN	28.038	NaN	NaN	84.5644	NaN	NaN
40	0.2	km	3	2.46751	NaN	NaN	21.9494	NaN	NaN	23.7484	NaN	NaN	54.2492	NaN	NaN
50	0.2	km	3	2.37526	NaN	NaN	18.1897	NaN	NaN	21.9547	NaN	NaN	46.0595	NaN	NaN
60	0.2	km	3	2.71671	NaN	NaN	12.752	NaN	NaN	20.024	NaN	NaN	38.2804	NaN	NaN
70	0.2	km	3	1.33731	NaN	NaN	9.79321	NaN	NaN	17.5751	NaN	NaN	33.2455	NaN	NaN
80	0.2	km	3	2.7082	NaN	NaN	9.90051	NaN	NaN	16.9647	NaN	NaN	32.314	NaN	NaN
90	0.2	km	3	1.55062	NaN	NaN	7.91951	NaN	NaN	15.9145	NaN	NaN	28.6527	NaN	NaN
100	0.2	km	3	2.5235	NaN	NaN	9.34959	NaN	NaN	15.947	NaN	NaN	28.6607	NaN	NaN
5	0.3	km	3	14.109	NaN	NaN	NaN	NaN	NaN	78.2864	NaN	NaN	NaN	NaN	NaN
10	0.3	km	3	6.12026	NaN	NaN	NaN	NaN	NaN	49.733	NaN	NaN	NaN	NaN	NaN
20	0.3	km	3	6.51503	NaN	NaN	57.0834	NaN	NaN	36.415	NaN	NaN	139.696	NaN	NaN
30	0.3	km	3	5.35133	NaN	NaN	41.49	NaN	NaN	28.2345	NaN	NaN	88.8394	NaN	NaN
40	0.3	km	3	5.04001	NaN	NaN	20.4035	NaN	NaN	24.4216	NaN	NaN	52.7878	NaN	NaN
50	0.3	km	3	5.51413	NaN	NaN	19.7017	NaN	NaN	22.3704	NaN	NaN	48.9435	NaN	NaN
60	0.3	km	3	4.19937	NaN	NaN	11.8196	NaN	NaN	20.3084	NaN	NaN	37.6553	NaN	NaN
70	0.3	km	3	3.86151	NaN	NaN	10.7733	NaN	NaN	18.2907	NaN	NaN	33.6501	NaN	NaN
80	0.3	km	3	4.76835	NaN	NaN	8.6803	NaN	NaN	18.2872	NaN	NaN	32.3004	NaN	NaN
90	0.3	km	3	4.96653	NaN	NaN	9.58906	NaN	NaN	16.244	NaN	NaN	29.6958	NaN	NaN
100	0.3	km	3	4.77836	NaN	NaN	7.80127	NaN	NaN	17.0605	NaN	NaN	26.798	NaN	NaN
5	0.4	km	3	26.2562	NaN	NaN	NaN	NaN	NaN	79.5408	NaN	NaN	NaN	NaN	NaN
10	0.4	km	3	13.3952	NaN	NaN	NaN	NaN	NaN	48.8904	NaN	NaN	NaN	NaN	NaN
20	0.4	km	3	9.74509	NaN	NaN	50.5849	NaN	NaN	33.5547	NaN	NaN	120.378	NaN	NaN
30	0.4	km	3	10.396	NaN	NaN	42.5033	NaN	NaN	28.7524	NaN	NaN	84.15	NaN	NaN
40	0.4	km	3	9.59078	NaN	NaN	21.4048	NaN	NaN	24.9118	NaN	NaN	54.7291	NaN	NaN
50	0.4	km	3	8.83692	NaN	NaN	19.0676	NaN	NaN	24.0858	NaN	NaN	50.6703	NaN	NaN
60	0.4	km	3	7.95857	NaN	NaN	12.4462	NaN	NaN	20.3523	NaN	NaN	40.446	NaN	NaN
70	0.4	km	3	9.02504	NaN	NaN	12.2615	NaN	NaN	21.3876	NaN	NaN	35.6811	NaN	NaN
80	0.4	km	3	8.72202	NaN	NaN	10.9469	NaN	NaN	18.6096	NaN	NaN	33.685	NaN	NaN
90	0.4	km	3	7.4615	NaN	NaN	7.70811	NaN	NaN	17.3991	NaN	NaN	29.8211	NaN	NaN
100	0.4	km	3	8.8759	NaN	NaN	8.51129	NaN	NaN	17.7454	NaN	NaN	29.5469	NaN	NaN
5	0.5	km	3	43.733	NaN	NaN	NaN	NaN	NaN	107.774	NaN	NaN	NaN	NaN	NaN
10	0.5	km	3	23.1527	NaN	NaN	NaN	NaN	NaN	52.4183	NaN	NaN	NaN	NaN	NaN
20	0.5	km	3	17.8583	NaN	NaN	51.0786	NaN	NaN	38.1328	NaN	NaN	119.267	NaN	NaN
30	0.5	km	3	16.0668	NaN	NaN	38.4734	NaN	NaN	29.0405	NaN	NaN	77.6757	NaN	NaN
40	0.5	km	3	15.7939	NaN	NaN	20.2186	NaN	NaN	29.1801	NaN	NaN	57.6444	NaN	NaN
50	0.5	km	3	14.4127	NaN	NaN	15.0721	NaN	NaN	24.6113	NaN	NaN	41.6546	NaN	NaN
60	0.5	km	3	14.7615	NaN	NaN	12.0497	NaN	NaN	23.6952	NaN	NaN	37.1821	NaN	NaN
70	0.5	km	3	14.9332	NaN	NaN	12.8327	NaN	NaN	22.9761	NaN	NaN	35.0116	NaN	NaN
80	0.5	km	3	14.9095	NaN	NaN	9.5003	NaN	NaN	21.799	NaN	NaN	30.9561	NaN	NaN
90	0.5	km	3	14.6616	NaN	NaN	9.01794	NaN	NaN	20.9305	NaN	NaN	28.2408	NaN	NaN
100	0.5	km	3	14.8417	NaN	NaN	7.74425	NaN	NaN	21.0595	NaN	NaN	27.956	NaN	NaN
5	0.6	km	3	80.2039	NaN	NaN	NaN	NaN	NaN	182.379	NaN	NaN	NaN	NaN	NaN
10	0.6	km	3	46.0908	NaN	NaN	NaN	NaN	NaN	79.9322	NaN	NaN	NaN	NaN	NaN
20	0.6	km	3	30.9905	NaN	NaN	50.7401	NaN	NaN	46.0777	NaN	NaN	134.063	NaN	NaN
30	0.6	km	3	28.0742	NaN	NaN	39.0841	NaN	NaN	37.9114	NaN	NaN	80.9997	NaN	NaN
40	0.6	km	3	27.084	NaN	NaN	22.0177	NaN	NaN	34.756	NaN	NaN	57.5884	NaN	NaN
50	0.6	km	3	25.9198	NaN	NaN	17.8786	NaN	NaN	32.8241	NaN	NaN	45.545	NaN	NaN
60	0.6	km	3	25.1438	NaN	NaN	11.9555	NaN	NaN	31.2622	NaN	NaN	39.8158	NaN	NaN
70	0.6	km	3	24.978	NaN	NaN	11.0447	NaN	NaN	30.2319	NaN	NaN	35.4293	NaN	NaN
80	0.6	km	3	25.381	NaN	NaN	10.4503	NaN	NaN	29.8812	NaN	NaN	32.847	NaN	NaN
90	0.6	km	3	24.6366	NaN	NaN	7.51445	NaN	NaN	29.0983	NaN	NaN	29.245	NaN	NaN
100	0.6	km	3	25.1807	NaN	NaN	7.29909	NaN	NaN	29.2091	NaN	NaN	27.6795	NaN	NaN
5	0.7	km	3	105.913	NaN	NaN	NaN	NaN	NaN	160.368	NaN	NaN	NaN	NaN	NaN
10	0.7	km	3	83.5935	NaN	NaN	NaN	NaN	NaN	137.94	NaN	NaN	NaN	NaN	NaN
20	0.7	km	3	54.432	NaN	NaN	48.582	NaN	NaN	68.0604	NaN	NaN	119.488	NaN	NaN
30	0.7	km	3	47.9318	NaN	NaN	40.7411	NaN	NaN	54.9397	NaN	NaN	88.7798	NaN	NaN
40	0.7	km	3	46.2176	NaN	NaN	21.5487	NaN	NaN	51.9282	NaN	NaN	55.9444	NaN	NaN
50	0.7	km	3	44.0861	NaN	NaN	15.3016	NaN	NaN	48.4712	NaN	NaN	42.8282	NaN	NaN
60	0.7	km	3	44.1612	NaN	NaN	13.5521	NaN	NaN	47.9075	NaN	NaN	40.5593	NaN	NaN
70	0.7	km	3	42.5909	NaN	NaN	11.6162	NaN	NaN	45.4906	NaN	NaN	34.7302	NaN	NaN
80	0.7	km	3	41.872	NaN	NaN	7.63767	NaN	NaN	44.6315	NaN	NaN	30.1202	NaN	NaN
90	0.7	km	3	42.3458	NaN	NaN	9.46472	NaN	NaN	44.9964	NaN	NaN	30.3079	NaN	NaN
100	0.7	km	3	43.2011	NaN	NaN	8.84604	NaN	NaN	45.4222	NaN	NaN	27.8803	NaN	NaN
5	0.8	km	3	172.514	NaN	NaN	NaN	NaN	NaN	252.834	NaN	NaN	NaN	NaN	NaN
10	0.8	km	3	142.687	NaN	NaN	NaN	NaN	NaN	186.296	NaN	NaN	NaN	NaN	NaN
20	0.8	km	3	103.756	NaN	NaN	52.8095	NaN	NaN	121.158	NaN	NaN	115.308	NaN	NaN
30	0.8	km	3	93.1646	NaN	NaN	39.2765	NaN	NaN	108.668	NaN	NaN	80.4023	NaN	NaN
40	0.8	km	3	84.0137	NaN	NaN	18.948	NaN	NaN	88.955	NaN	NaN	58.3754	NaN	NaN
50	0.8	km	3	81.7801	NaN	NaN	19.4657	NaN	NaN	84.7273	NaN	NaN	48.8691	NaN	NaN
60	0.8	km	3	79.2432	NaN	NaN	13.2906	NaN	NaN	81.5926	NaN	NaN	39.1129	NaN	NaN
70	0.8	km	3	76.899	NaN	NaN	11.3486	NaN	NaN	78.8432	NaN	NaN	36.1412	NaN	NaN
80	0.8	km	3	77.1215	NaN	NaN	10.7211	NaN	NaN	78.7049	NaN	NaN	32.3125	NaN	NaN
90	0.8	km	3	76.0872	NaN	NaN	9.2158	NaN	NaN	77.4027	NaN	NaN	28.0763	NaN	NaN
100	0.8	km	3	75.286	NaN	NaN	8.19692	NaN	NaN	76.4455	NaN	NaN	27.9041	NaN	NaN
5	0.9	km	3	310.444	NaN	NaN	NaN	NaN	NaN	400.979	NaN	NaN	NaN	NaN	NaN
10	0.9	km	3	283.185	NaN	NaN	NaN	NaN	NaN	376.842	NaN	NaN	NaN	NaN	NaN
20	0.9	km	3	236.86	NaN	NaN	63.1226	NaN	NaN	287.478	NaN	NaN	134.544	NaN	NaN
30	0.9	km	3	211.046	NaN	NaN	43.0279	NaN	NaN	249.028	NaN	NaN	83.7491	NaN	NaN
40	0.9	km	3	194.495	NaN	NaN	19.9999	NaN	NaN	216.847	NaN	NaN	55.3868	NaN	NaN
50	0.9	km	3	181.372	NaN	NaN	17.5443	NaN	NaN	195.067	NaN	NaN	47.511	NaN	NaN
60	0.9	km	3	171.929	NaN	NaN	12.5739	NaN	NaN	177.422	NaN	NaN	38.876	NaN	NaN
70	0.9	km	3	167.48	NaN	NaN	11.3573	NaN	NaN	179.199	NaN	NaN	33.6274	NaN	NaN
80	0.9	km	3	164.552	NaN	NaN	7.71175	NaN	NaN	168.627	NaN	NaN	30.511	NaN	NaN
90	0.9	km	3	160.45	NaN	NaN	9.57906	NaN	NaN	162.377	NaN	NaN	29.9633	NaN	NaN
100	0.9	km	3	159.891	NaN	NaN	6.0504	NaN	NaN	161.803	NaN	NaN	26.1917	NaN	NaN
5	0.1	km	4	5.63608	NaN	NaN	NaN	NaN	NaN	108.341	NaN	NaN	NaN	NaN	NaN
10	0.1	km	4	2.18472	NaN	NaN	NaN	NaN	NaN	71.0944	NaN	NaN	NaN	NaN	NaN
20	0.1	km	4	1.27296	NaN	NaN	78.6962	NaN	NaN	52.1797	NaN	NaN	195.344	NaN	NaN
30	0.1	km	4	-1.02242	NaN	NaN	57.9446	NaN	NaN	40.6047	NaN	NaN	126.866	NaN	NaN
40	0.1	km	4	-0.302073	NaN	NaN	29.3076	NaN	NaN	39.1071	NaN	NaN	84.5179	NaN	NaN
50	0.1	km	4	-0.664162	NaN	NaN	26.7023	NaN	NaN	30.9577	NaN	NaN	63.7941	NaN	NaN
60	0.1	km	4	0.0181596	NaN	NaN	18.0973	NaN	NaN	29.8219	NaN	NaN	55.0407	NaN	NaN
70	0.1	km	4	0.753654	NaN	NaN	19.0971	NaN	NaN	27.5421	NaN	NaN	50.7021	NaN	NaN
80	0.1	km	4	0.922096	NaN	NaN	13.518	NaN	NaN	26.6947	NaN	NaN	41.9482	NaN	NaN
90	0.1	km	4	0.456223	NaN	NaN	13.0719	NaN	NaN	25.5108	NaN	NaN	41.6424	NaN	NaN
100	0.1	km	4	1.28188	NaN	NaN	13.3864	NaN	NaN	24.8889	NaN	NaN	38.0187	NaN	NaN
5	0.2	km	4	11.1496	NaN	NaN	NaN	NaN	NaN	162.237	NaN	NaN	NaN	NaN	NaN
10	0.2	km	4	3.58759	NaN	NaN	NaN	NaN	NaN	70.0967	NaN	NaN	NaN	NaN	NaN
20	0.2	km	4	2.10582	NaN	NaN	82.2353	NaN	NaN	54.0254	NaN	NaN	214.483	NaN	NaN
30	0.2	km	4	2.00847	NaN	NaN	64.0631	NaN	NaN	43.6761	NaN	NaN	138.56	NaN	NaN
40	0.2	km	4	1.99555	NaN	NaN	32.1484	NaN	NaN	37.4349	NaN	NaN	77.5624	NaN	NaN
50	0.2	km	4	2.1959	NaN	NaN	27.1009	NaN	NaN	36.3418	NaN	NaN	66.0346	NaN	NaN
60	0.2	km	4	2.11603	NaN	NaN	18.4027	NaN	NaN	32.5391	NaN	NaN	52.8937	NaN	NaN
70	0.2	km	4	-0.154563	NaN	NaN	13.9985	NaN	NaN	25.3343	NaN	NaN	44.4432	NaN	NaN
80	0.2	km	4	2.67577	NaN	NaN	14.8876	NaN	NaN	26.4976	NaN	NaN	44.0097	NaN	NaN
90	0.2	km	4	0.272025	NaN	NaN	11.0903	NaN	NaN	24.1744	NaN	NaN	37.8126	NaN	NaN
100	0.2	km	4	2.50152	NaN	NaN	13.0773	NaN	NaN	26.3902	NaN	NaN	38.2739	NaN	NaN
5	0.3	km	4	16.7537	NaN	NaN	NaN	NaN	NaN	128.223	NaN	NaN	NaN	NaN	NaN
10	0.3	km	4	4.83011	NaN	NaN	NaN	NaN	NaN	80.4786	NaN	NaN	NaN	NaN	NaN
20	0.3	km	4	6.4114	NaN	NaN	91.8066	NaN	NaN	60.2455	NaN	NaN	256.545	NaN	NaN
30	0.3	km	4	3.46746	NaN	NaN	62.7936	NaN	NaN	43.4317	NaN	NaN	143.604	NaN	NaN
40	0.3	km	4	3.46961	NaN	NaN	28.8078	NaN	NaN	36.9973	NaN	NaN	72.78	NaN	NaN
50	0.3	km	4	4.19593	NaN	NaN	27.6497	NaN	NaN	33.9235	NaN	NaN	68.5827	NaN	NaN
60	0.3	km	4	3.19593	NaN	NaN	17.8103	NaN	NaN	33.9012	NaN	NaN	53.6295	NaN	NaN
70	0.3	km	4	2.57162	NaN	NaN	16.0523	NaN	NaN	28.6386	NaN	NaN	46.5404	NaN	NaN
80	0.3	km	4	3.90185	NaN	NaN	12.4733	NaN	NaN	28.1609	NaN	NaN	43.4397	NaN	NaN
90	0.3	km	4	4.07048	NaN	NaN	13.7589	NaN	NaN	25.038	NaN	NaN	40.0771	NaN	NaN
100	0.3	km	4	3.64528	NaN	NaN	10.7473	NaN	NaN	30.3796	NaN	NaN	35.6556	NaN	NaN
5	0.4	km	4	24.1455	NaN	NaN	NaN	NaN	NaN	106.576	NaN	NaN	NaN	NaN	NaN
10	0.4	km	4	8.91336	NaN	NaN	NaN	NaN	NaN	69.1711	NaN	NaN	NaN	NaN	NaN
20	0.4	km	4	8.73403	NaN	NaN	83.16	NaN	NaN	52.0466	NaN	NaN	204.483	NaN	NaN
30	0.4	km	4	8.31715	NaN	NaN	66.5492	NaN	NaN	42.0778	NaN	NaN	133.868	NaN	NaN
40	0.4	km	4	7.46575	NaN	NaN	32.9026	NaN	NaN	37.6634	NaN	NaN	87.6724	NaN	NaN
50	0.4	km	4	7.43912	NaN	NaN	27.9304	NaN	NaN	38.6702	NaN	NaN	72.8532	NaN	NaN
60	0.4	km	4	4.95072	NaN	NaN	17.2943	NaN	NaN	28.5493	NaN	NaN	53.7739	NaN	NaN
70	0.4	km	4	7.05227	NaN	NaN	17.3415	NaN	NaN	32.5905	NaN	NaN	48.7355	NaN	NaN
80	0.4	km	4	5.87036	NaN	NaN	14.7478	NaN	NaN	26.1152	NaN	NaN	45.5292	NaN	NaN
90	0.4	km	4	5.13205	NaN	NaN	11.3062	NaN	NaN	25.5664	NaN	NaN	39.4773	NaN	NaN
100	0.4	km	4	7.21689	NaN	NaN	12.2892	NaN	NaN	25.2395	NaN	NaN	40.2657	NaN	NaN
5	0.5	km	4	49.2188	NaN	NaN	NaN	NaN	NaN	199.472	NaN	NaN	NaN	NaN	NaN
10	0.5	km	4	19.4913	NaN	NaN	NaN	NaN	NaN	72.8166	NaN	NaN	NaN	NaN	NaN
20	0.5	km	4	13.8116	NaN	NaN	79.6048	NaN	NaN	53.8783	NaN	NaN	195.653	NaN	NaN
30	0.5	km	4	12.369	NaN	NaN	59.7223	NaN	NaN	39.979	NaN	NaN	125.246	NaN	NaN
40	0.5	km	4	12.3407	NaN	NaN	28.6227	NaN	NaN	39.5438	NaN	NaN	75.526	NaN	NaN
50	0.5	km	4	11.0649	NaN	NaN	22.9334	NaN	NaN	33.5833	NaN	NaN	58.0768	NaN	NaN
60	0.5	km	4	11.4194	NaN	NaN	17.0437	NaN	NaN	31.6599	NaN	NaN	51.4468	NaN	NaN
70	0.5	km	4	11.9571	NaN	NaN	17.2815	NaN	NaN	29.9662	NaN	NaN	46.4173	NaN	NaN
80	0.5	km	4	12.3187	NaN	NaN	14.2708	NaN	NaN	28.0195	NaN	NaN	41.9125	NaN	NaN
90	0.5	km	4	11.765	NaN	NaN	12.814	NaN	NaN	27.1773	NaN	NaN	37.9931	NaN	NaN
100	0.5	km	4	11.5035	NaN	NaN	10.3834	NaN	NaN	26.4957	NaN	NaN	36.2093	NaN	NaN
5	0.6	km	4	83.6409	NaN	NaN	NaN	NaN	NaN	252.316	NaN	NaN	NaN	NaN	NaN
10	0.6	km	4	45.1894	NaN	NaN	NaN	NaN	NaN	106.161	NaN	NaN	NaN	NaN	NaN
20	0.6	km	4	27.5078	NaN	NaN	80.2318	NaN	NaN	62.8899	NaN	NaN	239.316	NaN	NaN
30	0.6	km	4	24.2525	NaN	NaN	61.767	NaN	NaN	45.4695	NaN	NaN	126.21	NaN	NaN
40	0.6	km	4	23.4345	NaN	NaN	32.3172	NaN	NaN	43.0781	NaN	NaN	82.6746	NaN	NaN
50	0.6	km	4	22.0636	NaN	NaN	25.5338	NaN	NaN	41.0316	NaN	NaN	64.4101	NaN	NaN
60	0.6	km	4	21.6252	NaN	NaN	17.3493	NaN	NaN	36.5392	NaN	NaN	53.1961	NaN	NaN
70	0.6	km	4	21.7825	NaN	NaN	17.7064	NaN	NaN	35.4544	NaN	NaN	50.2351	NaN	NaN
80	0.6	km	4	21.2061	NaN	NaN	13.9231	NaN	NaN	32.4423	NaN	NaN	43.8928	NaN	NaN
90	0.6	km	4	20.8363	NaN	NaN	11.1276	NaN	NaN	33.5348	NaN	NaN	39.1009	NaN	NaN
100	0.6	km	4	21.8621	NaN	NaN	10.9438	NaN	NaN	32.6852	NaN	NaN	37.3002	NaN	NaN
5	0.7	km	4	118.717	NaN	NaN	NaN	NaN	NaN	214.797	NaN	NaN	NaN	NaN	NaN
10	0.7	km	4	91.52	NaN	NaN	NaN	NaN	NaN	203.586	NaN	NaN	NaN	NaN	NaN
20	0.7	km	4	50.7888	NaN	NaN	75.4019	NaN	NaN	77.7588	NaN	NaN	188.671	NaN	NaN
30	0.7	km	4	44.7687	NaN	NaN	64.5718	NaN	NaN	63.0988	NaN	NaN	150.31	NaN	NaN
40	0.7	km	4	42.3596	NaN	NaN	31.411	NaN	NaN	56.572	NaN	NaN	80.7503	NaN	NaN
50	0.7	km	4	40.3073	NaN	NaN	23.6698	NaN	NaN	50.8014	NaN	NaN	60.1379	NaN	NaN
60	0.7	km	4	40.6877	NaN	NaN	19.466	NaN	NaN	50.3927	NaN	NaN	56.1883	NaN	NaN
70	0.7	km	4	37.7567	NaN	NaN	15.392	NaN	NaN	45.4409	NaN	NaN	45.4631	NaN	NaN
80	0.7	km	4	38.328	NaN	NaN	11.7019	NaN	NaN	46.4674	NaN	NaN	41.5954	NaN	NaN
90	0.7	km	4	38.4855	NaN	NaN	14.0489	NaN	NaN	45.3595	NaN	NaN	41.4627	NaN	NaN
100	0.7	km	4	40.329	NaN	NaN	12.5684	NaN	NaN	46.6277	NaN	NaN	37.0192	NaN	NaN
5	0.8	km	4	209.567	NaN	NaN	NaN	NaN	NaN	376.346	NaN	NaN	NaN	NaN	NaN
10	0.8	km	4	168.913	NaN	NaN	NaN	NaN	NaN	261.618	NaN	NaN	NaN	NaN	NaN
20	0.8	km	4	109.758	NaN	NaN	81.7876	NaN	NaN	141.294	NaN	NaN	187.215	NaN	NaN
30	0.8	km	4	95.9723	NaN	NaN	62.6251	NaN	NaN	128.752	NaN	NaN	133.163	NaN	NaN
40	0.8	km	4	84.9902	NaN	NaN	27.7014	NaN	NaN	96.2974	NaN	NaN	85.7214	NaN	NaN
50	0.8	km	4	81.4231	NaN	NaN	26.9245	NaN	NaN	88.3724	NaN	NaN	69.0494	NaN	NaN
60	0.8	km	4	80.4506	NaN	NaN	19.7024	NaN	NaN	86.9571	NaN	NaN	53.3174	NaN	NaN
70	0.8	km	4	76.1893	NaN	NaN	17.0617	NaN	NaN	81.0651	NaN	NaN	51.2406	NaN	NaN
80	0.8	km	4	76.4684	NaN	NaN	14.9042	NaN	NaN	80.4163	NaN	NaN	42.8271	NaN	NaN
90	0.8	km	4	74.9304	NaN	NaN	12.078	NaN	NaN	78.6093	NaN	NaN	36.8064	NaN	NaN
100	0.8	km	4	73.5673	NaN	NaN	10.1164	NaN	NaN	76.5529	NaN	NaN	35.8534	NaN	NaN
5	0.9	km	4	408.456	NaN	NaN	NaN	NaN	NaN	614.048	NaN	NaN	NaN	NaN	NaN
10	0.9	km	4	365.478	NaN	NaN	NaN	NaN	NaN	572.869	NaN	NaN	NaN	NaN	NaN
20	0.9	km	4	293.784	NaN	NaN	97.4631	NaN	NaN	412.47	NaN	NaN	233.295	NaN	NaN
30	0.9	km	4	252.965	NaN	NaN	64.3097	NaN	NaN	340.74	NaN	NaN	131.147	NaN	NaN
40	0.9	km	4	230.184	NaN	NaN	29.6561	NaN	NaN	280.465	NaN	NaN	81.8079	NaN	NaN
50	0.9	km	4	209.602	NaN	NaN	28.326	NaN	NaN	238.751	NaN	NaN	71.611	NaN	NaN
60	0.9	km	4	195.975	NaN	NaN	18.0676	NaN	NaN	206.935	NaN	NaN	54.1411	NaN	NaN
70	0.9	km	4	188.614	NaN	NaN	15.5123	NaN	NaN	218.021	NaN	NaN	44.8552	NaN	NaN
80	0.9	km	4	183.052	NaN	NaN	11.0686	NaN	NaN	189.199	NaN	NaN	40.5825	NaN	NaN
90	0.9	km	4	179.727	NaN	NaN	13.3995	NaN	NaN	183.882	NaN	NaN	40.0037	NaN	NaN
100	0.9	km	4	178.827	NaN	NaN	9.46941	NaN	NaN	182.757	NaN	NaN	35.7144	NaN	NaN
5	0.1	km	5	6.49456	NaN	NaN	NaN	NaN	NaN	147.874	NaN	NaN	NaN	NaN	NaN
10	0.1	km	5	4.18938	NaN	NaN	NaN	NaN	NaN	104.665	NaN	NaN	NaN	NaN	NaN
20	0.1	km	5	1.91972	NaN	NaN	114.331	NaN	NaN	74.6555	NaN	NaN	307.303	NaN	NaN
30	0.1	km	5	-2.32051	NaN	NaN	79.6713	NaN	NaN	54.6406	NaN	NaN	178.667	NaN	NaN
40	0.1	km	5	-0.822027	NaN	NaN	40.0129	NaN	NaN	56.3604	NaN	NaN	116.268	NaN	NaN
50	0.1	km	5	-2.29964	NaN	NaN	31.617	NaN	NaN	41.8285	NaN	NaN	77.9021	NaN	NaN
60	0.1	km	5	0.332497	NaN	NaN	23.9623	NaN	NaN	47.301	NaN	NaN	69.2732	NaN	NaN
70	0.1	km	5	0.697196	NaN	NaN	23.94	NaN	NaN	37.6418	NaN	NaN	58.7024	NaN	NaN
80	0.1	km	5	1.59409	NaN	NaN	17.8506	NaN	NaN	37.9732	NaN	NaN	51.5243	NaN	NaN
90	0.1	km	5	-0.00797756	NaN	NaN	15.8006	NaN	NaN	35.9241	NaN	NaN	49.4969	NaN	NaN
100	0.1	km	5	1.42321	NaN	NaN	15.852	NaN	NaN	35.9141	NaN	NaN	45.6094	NaN	NaN
5	0.2	km	5	17.8539	NaN	NaN	NaN	NaN	NaN	288.957	NaN	NaN	NaN	NaN	NaN
10	0.2	km	5	-0.615045	NaN	NaN	NaN	NaN	NaN	88.7026	NaN	NaN	NaN	NaN	NaN
20	0.2	km	5	1.0017	NaN	NaN	108.99	NaN	NaN	67.2935	NaN	NaN	273.032	NaN	NaN
30	0.2	km	5	2.03948	NaN	NaN	91.1178	NaN	NaN	60.529	NaN	NaN	204.176	NaN	NaN
40	0.2	km	5	2.0219	NaN	NaN	40.6716	NaN	NaN	52.708	NaN	NaN	95.1105	NaN	NaN
50	0.2	km	5	3.00831	NaN	NaN	36.5059	NaN	NaN	56.16	NaN	NaN	86.6585	NaN	NaN
60	0.2	km	5	0.668015	NaN	NaN	22.6585	NaN	NaN	42.9237	NaN	NaN	65.4574	NaN	NaN
70	0.2	km	5	-2.13336	NaN	NaN	17.4729	NaN	NaN	33.569	NaN	NaN	53.9194	NaN	NaN
80	0.2	km	5	1.89554	NaN	NaN	18.5148	NaN	NaN	36.225	NaN	NaN	53.8509	NaN	NaN
90	0.2	km	5	-0.754355	NaN	NaN	13.7883	NaN	NaN	34.0878	NaN	NaN	45.9948	NaN	NaN
100	0.2	km	5	2.04653	NaN	NaN	16.0584	NaN	NaN	39.4288	NaN	NaN	46.0345	NaN	NaN
5	0.3	km	5	11.5724	NaN	NaN	NaN	NaN	NaN	153.959	NaN	NaN	NaN	NaN	NaN
10	0.3	km	5	5.09284	NaN	NaN	NaN	NaN	NaN	112.078	NaN	NaN	NaN	NaN	NaN
20	0.3	km	5	7.3854	NaN	NaN	133.068	NaN	NaN	93.4045	NaN	NaN	428.246	NaN	NaN
30	0.3	km	5	3.31766	NaN	NaN	89.2466	NaN	NaN	65.3973	NaN	NaN	222.706	NaN	NaN
40	0.3	km	5	2.04042	NaN	NaN	37.5154	NaN	NaN	53.7428	NaN	NaN	96.3881	NaN	NaN
50	0.3	km	5	3.67302	NaN	NaN	37.0845	NaN	NaN	46.2015	NaN	NaN	89.0359	NaN	NaN
60	0.3	km	5	3.1049	NaN	NaN	23.9744	NaN	NaN	52.0158	NaN	NaN	67.8738	NaN	NaN
70	0.3	km	5	2.45677	NaN	NaN	20.2262	NaN	NaN	45.4697	NaN	NaN	57.6751	NaN	NaN
80	0.3	km	5	3.56619	NaN	NaN	16.372	NaN	NaN	40.0603	NaN	NaN	55.0999	NaN	NaN
90	0.3	km	5	3.174	NaN	NaN	18.156	NaN	NaN	35.2067	NaN	NaN	50.4649	NaN	NaN
100	0.3	km	5	4.043	NaN	NaN	14.5653	NaN	NaN	54.3256	NaN	NaN	44.5959	NaN	NaN
5	0.4	km	5	20.7319	NaN	NaN	NaN	NaN	NaN	132.945	NaN	NaN	NaN	NaN	NaN
10	0.4	km	5	7.31285	NaN	NaN	NaN	NaN	NaN	102.829	NaN	NaN	NaN	NaN	NaN
20	0.4	km	5	6.56148	NaN	NaN	115.986	NaN	NaN	71.4533	NaN	NaN	299.757	NaN	NaN
30	0.4	km	5	5.00781	NaN	NaN	87.0782	NaN	NaN	52.057	NaN	NaN	175.389	NaN	NaN
40	0.4	km	5	5.89025	NaN	NaN	41.5645	NaN	NaN	53.4543	NaN	NaN	114.976	NaN	NaN
50	0.4	km	5	6.88703	NaN	NaN	36.1448	NaN	NaN	57.9374	NaN	NaN	93.3504	NaN	NaN
60	0.4	km	5	3.20437	NaN	NaN	22.7025	NaN	NaN	39.7155	NaN	NaN	68.6477	NaN	NaN
70	0.4	km	5	6.2718	NaN	NaN	24.767	NaN	NaN	45.1258	NaN	NaN	64.387	NaN	NaN
80	0.4	km	5	4.09265	NaN	NaN	19.1219	NaN	NaN	35.512	NaN	NaN	55.3947	NaN	NaN
90	0.4	km	5	3.36091	NaN	NaN	13.9143	NaN	NaN	38.2779	NaN	NaN	46.9474	NaN	NaN
100	0.4	km	5	5.76575	NaN	NaN	15.2308	NaN	NaN	35.1091	NaN	NaN	49.2968	NaN	NaN
5	0.5	km	5	60.2699	NaN	NaN	NaN	NaN	NaN	348.915	NaN	NaN	NaN	NaN	NaN
10	0.5	km	5	13.5562	NaN	NaN	NaN	NaN	NaN	89.5868	NaN	NaN	NaN	NaN	NaN
20	0.5	km	5	10.7837	NaN	NaN	110.601	NaN	NaN	81.8107	NaN	NaN	341.07	NaN	NaN
30	0.5	km	5	9.49472	NaN	NaN	83.3885	NaN	NaN	55.9524	NaN	NaN	188.329	NaN	NaN
40	0.5	km	5	9.49052	NaN	NaN	38.5516	NaN	NaN	51.2375	NaN	NaN	96.8361	NaN	NaN
50	0.5	km	5	8.21067	NaN	NaN	30.6972	NaN	NaN	45.6826	NaN	NaN	76.664	NaN	NaN
60	0.5	km	5	7.99521	NaN	NaN	21.1242	NaN	NaN	42.6257	NaN	NaN	62.6254	NaN	NaN
70	0.5	km	5	8.51074	NaN	NaN	19.7347	NaN	NaN	37.8435	NaN	NaN	53.8313	NaN	NaN
80	0.5	km	5	9.12854	NaN	NaN	17.3295	NaN	NaN	35.8601	NaN	NaN	51.3847	NaN	NaN
90	0.5	km	5	8.99874	NaN	NaN	16.6694	NaN	NaN	34.8415	NaN	NaN	46.5248	NaN	NaN
100	0.5	km	5	8.34287	NaN	NaN	12.766	NaN	NaN	35.5316	NaN	NaN	43.2457	NaN	NaN
5	0.6	km	5	74.152	NaN	NaN	NaN	NaN	NaN	234.249	NaN	NaN	NaN	NaN	NaN
10	0.6	km	5	41.4912	NaN	NaN	NaN	NaN	NaN	130.112	NaN	NaN	NaN	NaN	NaN
20	0.6	km	5	22.7589	NaN	NaN	108.621	NaN	NaN	78.8455	NaN	NaN	328.358	NaN	NaN
30	0.6	km	5	19.6067	NaN	NaN	85.6053	NaN	NaN	57.1266	NaN	NaN	184.113	NaN	NaN
40	0.6	km	5	18.0935	NaN	NaN	42.8826	NaN	NaN	54.6752	NaN	NaN	110.446	NaN	NaN
50	0.6	km	5	17.5911	NaN	NaN	32.1666	NaN	NaN	54.684	NaN	NaN	80.1928	NaN	NaN
60	0.6	km	5	18.1405	NaN	NaN	22.4368	NaN	NaN	45.4487	NaN	NaN	65.4972	NaN	NaN
70	0.6	km	5	18.0562	NaN	NaN	23.0182	NaN	NaN	44.3759	NaN	NaN	62.8735	NaN	NaN
80	0.6	km	5	17.4333	NaN	NaN	18.0264	NaN	NaN	38.696	NaN	NaN	54.105	NaN	NaN
90	0.6	km	5	16.9959	NaN	NaN	14.1452	NaN	NaN	44.7736	NaN	NaN	47.4564	NaN	NaN
100	0.6	km	5	18.8642	NaN	NaN	14.0227	NaN	NaN	39.773	NaN	NaN	44.9608	NaN	NaN
5	0.7	km	5	116.721	NaN	NaN	NaN	NaN	NaN	249.765	NaN	NaN	NaN	NaN	NaN
10	0.7	km	5	93.0128	NaN	NaN	NaN	NaN	NaN	279.897	NaN	NaN	NaN	NaN	NaN
20	0.7	km	5	43.9637	NaN	NaN	99.4718	NaN	NaN	88.5504	NaN	NaN	268.759	NaN	NaN
30	0.7	km	5	38.508	NaN	NaN	87.7405	NaN	NaN	74.5729	NaN	NaN	220.617	NaN	NaN
40	0.7	km	5	36.7098	NaN	NaN	39.0588	NaN	NaN	64.3543	NaN	NaN	101.126	NaN	NaN
50	0.7	km	5	34.5554	NaN	NaN	31.2786	NaN	NaN	56.1628	NaN	NaN	79.5632	NaN	NaN
60	0.7	km	5	35.462	NaN	NaN	26.1547	NaN	NaN	54.3318	NaN	NaN	71.5694	NaN	NaN
70	0.7	km	5	31.523	NaN	NaN	19.8235	NaN	NaN	47.0813	NaN	NaN	55.5848	NaN	NaN
80	0.7	km	5	33.2883	NaN	NaN	15.1825	NaN	NaN	52.4986	NaN	NaN	51.7657	NaN	NaN
90	0.7	km	5	32.5303	NaN	NaN	17.553	NaN	NaN	46.9983	NaN	NaN	50.5236	NaN	NaN
100	0.7	km	5	34.975	NaN	NaN	15.0554	NaN	NaN	48.6773	NaN	NaN	44.0545	NaN	NaN
5	0.8	km	5	241.976	NaN	NaN	NaN	NaN	NaN	530.981	NaN	NaN	NaN	NaN	NaN
10	0.8	km	5	189.317	NaN	NaN	NaN	NaN	NaN	397.09	NaN	NaN	NaN	NaN	NaN
20	0.8	km	5	108.764	NaN	NaN	119.655	NaN	NaN	157.115	NaN	NaN	283.679	NaN	NaN
30	0.8	km	5	90.8754	NaN	NaN	85.8092	NaN	NaN	145.723	NaN	NaN	187.186	NaN	NaN
40	0.8	km	5	79.4201	NaN	NaN	37.0868	NaN	NaN	101.498	NaN	NaN	114.739	NaN	NaN
50	0.8	km	5	75.2074	NaN	NaN	35.0247	NaN	NaN	88.8499	NaN	NaN	86.8566	NaN	NaN
60	0.8	km	5	74.7656	NaN	NaN	23.1752	NaN	NaN	90.3177	NaN	NaN	64.7263	NaN	NaN
70	0.8	km	5	70.2079	NaN	NaN	21.7109	NaN	NaN	80.7357	NaN	NaN	65.1091	NaN	NaN
80	0.8	km	5	69.7763	NaN	NaN	17.8071	NaN	NaN	77.7128	NaN	NaN	51.3635	NaN	NaN
90	0.8	km	5	69.5306	NaN	NaN	15.7906	NaN	NaN	79.1458	NaN	NaN	45.0942	NaN	NaN
100	0.8	km	5	67.0779	NaN	NaN	13.1833	NaN	NaN	73.5763	NaN	NaN	44.5731	NaN	NaN
5	0.9	km	5	472.123	NaN	NaN	NaN	NaN	NaN	814.288	NaN	NaN	NaN	NaN	NaN
10	0.9	km	5	404.858	NaN	NaN	NaN	NaN	NaN	726.122	NaN	NaN	NaN	NaN	NaN
20	0.9	km	5	331.492	NaN	NaN	132.751	NaN	NaN	541.662	NaN	NaN	354.195	NaN	NaN
30	0.9	km	5	274.162	NaN	NaN	88.4464	NaN	NaN	428.07	NaN	NaN	194.021	NaN	NaN
40	0.9	km	5	246.912	NaN	NaN	39.2413	NaN	NaN	333.1	NaN	NaN	111.189	NaN	NaN
50	0.9	km	5	215.624	NaN	NaN	36.1369	NaN	NaN	262.779	NaN	NaN	92.3214	NaN	NaN
60	0.9	km	5	202.983	NaN	NaN	22.8942	NaN	NaN	222.133	NaN	NaN	68.2576	NaN	NaN
70	0.9	km	5	194.379	NaN	NaN	19.8696	NaN	NaN	250.11	NaN	NaN	56.4479	NaN	NaN
80	0.9	km	5	185.084	NaN	NaN	14.6747	NaN	NaN	195.049	NaN	NaN	50.4326	NaN	NaN
90	0.9	km	5	181.226	NaN	NaN	16.9252	NaN	NaN	188.252	NaN	NaN	50.1528	NaN	NaN
100	0.9	km	5	181.154	NaN	NaN	12.3939	NaN	NaN	188.53	NaN	NaN	43.024	NaN	NaN

## Sheet: multiple LODs
Comparison of Methods for Analyzing Left-Censored Occupational Exposure Data
Tran Huynh, Gurumurthy Ramachandran, Sudipto Banerjee, Joao Monteiro, Mark Stenzel, Dale P Sandler, Lawrence S Engel, Richard K Kwok, Aaron Blair and Patricia A Stewart
N	p	Method	GSD	BiasAM	BiasGM	BiasGSD	Bias95th	BiasAM (ml-AM)	BiasAM (MVUE-AM)	rMSEam	rMSEgm	rMSEgsd	rMSE95th	rMSEam (ml-AM)	rMSEam (MVUE-AM)
5	0.1	beta	2	0.231167	1.59853	4.51018	2.21535	NaN	NaN	35.3307	33.5475	33.4239	52.2351	NaN	NaN
10	0.1	beta	2	0.142715	1.01756	1.40516	1.14298	NaN	NaN	24.7922	23.5762	18.3415	34.7528	NaN	NaN
20	0.1	beta	2	0.124854	0.41112	0.624665	0.857651	NaN	NaN	17.8341	15.9495	12.1343	25.3356	NaN	NaN
30	0.1	beta	2	-0.296148	-0.20258	0.5948	0.317899	NaN	NaN	14.3214	12.937	9.92905	20.3003	NaN	NaN
40	0.1	beta	2	0.00303336	0.05114	0.445115	0.454026	NaN	NaN	12.4318	11.1734	9.16068	18.1383	NaN	NaN
50	0.1	beta	2	-0.486091	-0.47214	0.405625	-0.0804973	NaN	NaN	10.8593	9.82719	7.98285	15.6787	NaN	NaN
60	0.1	beta	2	-0.319435	-0.47753	0.540255	0.248811	NaN	NaN	10.183	8.96968	7.39285	14.8432	NaN	NaN
70	0.1	beta	2	0.137501	-0.09396	0.630775	0.770971	NaN	NaN	9.11188	8.13445	6.61539	13.2438	NaN	NaN
80	0.1	beta	2	0.410642	0.31855	0.39837	0.806815	NaN	NaN	8.82899	8.05288	6.3082	12.6363	NaN	NaN
90	0.1	beta	2	0.181211	0.20419	0.18353	0.399689	NaN	NaN	8.28272	7.36452	5.68899	11.8307	NaN	NaN
100	0.1	beta	2	0.121709	-0.22064	0.67351	0.800394	NaN	NaN	8.08442	7.11622	5.91251	11.849	NaN	NaN
5	0.2	beta	2	0.943368	1.60301	6.76297	3.18734	NaN	NaN	37.9092	35.6122	44.0064	55.6039	NaN	NaN
10	0.2	beta	2	1.16035	1.07531	3.31236	3.34749	NaN	NaN	24.6533	24.0511	21.2702	35.3154	NaN	NaN
20	0.2	beta	2	-0.00602654	-0.22233	1.53511	1.3131	NaN	NaN	17.5762	16.2111	13.6572	25.6391	NaN	NaN
30	0.2	beta	2	-0.33768	-0.3826	0.86501	0.399145	NaN	NaN	14.2701	13.2218	10.8937	20.5863	NaN	NaN
40	0.2	beta	2	0.173433	-0.02511	0.88866	0.95527	NaN	NaN	12.3417	11.6108	9.41636	17.6977	NaN	NaN
50	0.2	beta	2	0.0111652	-0.31415	0.91223	0.862115	NaN	NaN	11.1449	10.2147	8.49832	16.2416	NaN	NaN
60	0.2	beta	2	0.334899	0.30835	0.39095	0.71854	NaN	NaN	10.4233	9.56719	7.45585	14.8377	NaN	NaN
70	0.2	beta	2	-0.296675	-0.06105	-0.008435	-0.339278	NaN	NaN	9.13997	8.67907	7.12234	13.1334	NaN	NaN
80	0.2	beta	2	0.348733	0.22122	0.471745	0.777818	NaN	NaN	8.73055	8.17476	6.68241	12.5832	NaN	NaN
90	0.2	beta	2	-0.362296	-0.23588	0.05614	-0.32053	NaN	NaN	8.20074	7.65585	6.37017	11.8977	NaN	NaN
100	0.2	beta	2	0.219417	0.10701	0.38418	0.580821	NaN	NaN	7.8927	7.33924	5.86073	11.3277	NaN	NaN
5	0.3	beta	2	-0.642797	-0.172024	10.3808	1.13921	NaN	NaN	36.5251	36.277	63.3616	54.1843	NaN	NaN
10	0.3	beta	2	-0.979864	-0.5598	3.14082	0.145935	NaN	NaN	24.8181	23.6759	32.5462	36.8982	NaN	NaN
20	0.3	beta	2	-0.218439	-0.37366	1.51616	0.908137	NaN	NaN	17.9944	17.0697	14.8328	26.132	NaN	NaN
30	0.3	beta	2	-0.250597	-0.51702	1.14651	0.6783	NaN	NaN	14.263	13.2577	12.3163	21.6275	NaN	NaN
40	0.3	beta	2	0.0304726	-0.00455	0.632365	0.555971	NaN	NaN	12.4822	11.7212	9.83663	18.1446	NaN	NaN
50	0.3	beta	2	-0.0833188	-0.10387	0.471985	0.313518	NaN	NaN	10.9442	10.2274	8.91095	16.1765	NaN	NaN
60	0.3	beta	2	-0.368281	-0.31419	0.299625	-0.138515	NaN	NaN	9.97304	9.42332	8.14706	14.671	NaN	NaN
70	0.3	beta	2	-0.267324	-0.12644	0.089485	-0.217999	NaN	NaN	9.4467	8.80135	7.79862	14.0991	NaN	NaN
80	0.3	beta	2	0.25892	0.26527	0.265035	0.48019	NaN	NaN	9.31081	8.79628	7.02404	13.2943	NaN	NaN
90	0.3	beta	2	0.413717	0.43195	0.23872	0.584285	NaN	NaN	8.12439	7.85383	6.81428	12.0267	NaN	NaN
100	0.3	beta	2	0.321947	0.17954	0.414265	0.697796	NaN	NaN	7.957	7.39417	6.44201	11.8316	NaN	NaN
5	0.4	beta	2	0.137783	-0.286707	11.3591	3.03205	NaN	NaN	35.2884	35.8228	53.2924	53.2971	NaN	NaN
10	0.4	beta	2	-0.850854	-0.87196	5.04587	0.401668	NaN	NaN	25.2509	25.9704	35.7931	37.023	NaN	NaN
20	0.4	beta	2	0.0735622	-0.62722	2.78958	1.67429	NaN	NaN	17.8504	18.1305	19.2006	26.8418	NaN	NaN
30	0.4	beta	2	0.206826	-0.21015	1.50625	1.2904	NaN	NaN	14.3349	14.0421	13.2238	21.5506	NaN	NaN
40	0.4	beta	2	0.377234	0.47217	0.54335	0.63181	NaN	NaN	12.5316	12.5429	10.9049	18.349	NaN	NaN
50	0.4	beta	2	-0.37661	-0.87305	1.23212	0.579622	NaN	NaN	11.3891	11.2078	10.4006	17.2118	NaN	NaN
60	0.4	beta	2	-0.189725	-0.20824	0.45468	0.105416	NaN	NaN	10.2582	10.08	8.76756	15.0105	NaN	NaN
70	0.4	beta	2	0.149659	0.1084	0.39514	0.404482	NaN	NaN	9.76111	9.55512	8.60731	14.6184	NaN	NaN
80	0.4	beta	2	0.0191477	-0.23785	0.723205	0.55216	NaN	NaN	8.72693	8.96784	8.0959	12.925	NaN	NaN
90	0.4	beta	2	-0.613598	-0.55481	0.175945	-0.527676	NaN	NaN	8.31467	8.12282	7.31851	12.4413	NaN	NaN
100	0.4	beta	2	0.208305	0.2786	0.14061	0.257698	NaN	NaN	8.06208	7.99442	7.03122	11.9367	NaN	NaN
5	0.5	beta	2	0.634362	1.08022	14.1813	0.886727	NaN	NaN	35.3366	38.5001	73.3676	51.9171	NaN	NaN
10	0.5	beta	2	-1.74325	-1.32381	5.35529	-1.70196	NaN	NaN	24.988	27.9403	38.25	36.1834	NaN	NaN
20	0.5	beta	2	-1.17466	-1.14248	1.72592	-0.845472	NaN	NaN	17.3304	18.5664	19.8309	26.7567	NaN	NaN
30	0.5	beta	2	-0.399456	-0.38522	1.37105	-0.113866	NaN	NaN	14.0334	16.1583	15.4461	20.3122	NaN	NaN
40	0.5	beta	2	-0.225941	-0.37387	0.975025	0.177772	NaN	NaN	12.7095	13.381	13.2093	19.6383	NaN	NaN
50	0.5	beta	2	-0.515009	-0.31036	0.342935	-0.573843	NaN	NaN	11.3053	12.1055	10.8861	16.4907	NaN	NaN
60	0.5	beta	2	-0.323571	-0.39064	0.62027	-0.0669515	NaN	NaN	10.0321	10.8371	10.3571	15.181	NaN	NaN
70	0.5	beta	2	-0.383444	-0.60831	0.743275	0.0993911	NaN	NaN	9.64326	10.0636	9.04457	14.187	NaN	NaN
80	0.5	beta	2	0.151893	0.29219	0.195745	0.0848475	NaN	NaN	8.53597	9.43579	8.70272	12.852	NaN	NaN
90	0.5	beta	2	-0.0700514	-0.1015	0.447805	0.0873706	NaN	NaN	8.48232	9.50987	8.37947	12.1595	NaN	NaN
100	0.5	beta	2	0.106766	0.09974	0.303855	0.196179	NaN	NaN	8.13281	8.73435	8.25494	12.4021	NaN	NaN
5	0.6	beta	2	2.30213	2.52919	20.1194	0.200433	NaN	NaN	31.9937	38.8846	100.445	48.4244	NaN	NaN
10	0.6	beta	2	-0.340199	-1.16022	9.1617	0.390281	NaN	NaN	25.5232	30.0291	48.7294	38.4332	NaN	NaN
20	0.6	beta	2	-0.856706	-1.30851	3.06004	-0.0741273	NaN	NaN	18.4744	21.2286	22.2459	27.1834	NaN	NaN
30	0.6	beta	2	-0.622666	-0.89821	2.112	-0.152969	NaN	NaN	14.6894	17.8971	17.7466	21.1692	NaN	NaN
40	0.6	beta	2	0.171711	0.00393	1.3072	0.487328	NaN	NaN	12.5037	14.7194	14.6649	19.0005	NaN	NaN
50	0.6	beta	2	-0.527278	-0.62855	1.05	-0.355568	NaN	NaN	11.2316	13.6393	13.4293	16.8634	NaN	NaN
60	0.6	beta	2	-0.200114	0.30202	-0.08359	-0.874505	NaN	NaN	10.2016	12.1776	11.8251	15.6812	NaN	NaN
70	0.6	beta	2	-0.0544482	0.33936	-0.024665	-0.522809	NaN	NaN	9.5734	11.1576	10.2106	14.1823	NaN	NaN
80	0.6	beta	2	0.283355	0.37965	0.3333	0.212852	NaN	NaN	9.20024	10.6419	9.72774	13.6105	NaN	NaN
90	0.6	beta	2	0.102173	0.2986	0.154185	-0.148543	NaN	NaN	8.43837	10.0852	9.67264	12.8873	NaN	NaN
100	0.6	beta	2	-0.0029122	-0.02768	0.42512	0.0682766	NaN	NaN	8.23474	9.63795	8.85894	12.2655	NaN	NaN
5	0.7	beta	2	7.4082	9.46022	12.5088	3.0481	NaN	NaN	30.4438	39.1494	69.2711	48.5678	NaN	NaN
10	0.7	beta	2	3.24398	4.11634	9.84728	0.446159	NaN	NaN	27.0277	34.0113	74.7605	39.3885	NaN	NaN
20	0.7	beta	2	-0.645269	-0.27854	3.86648	-1.6452	NaN	NaN	19.5696	25.3307	33.0677	27.1432	NaN	NaN
30	0.7	beta	2	-0.193225	0.29362	1.72262	-1.1411	NaN	NaN	15.7854	21.0361	21.245	21.7545	NaN	NaN
40	0.7	beta	2	-0.14544	-0.11891	1.73314	-0.47332	NaN	NaN	13.5829	18.4794	18.5539	19.4452	NaN	NaN
50	0.7	beta	2	-0.0513339	0.6348	0.18386	-1.13103	NaN	NaN	12.2242	16.0454	14.784	17.1013	NaN	NaN
60	0.7	beta	2	-0.162868	-0.32249	1.25767	-0.0527981	NaN	NaN	11.2636	14.7235	13.7844	15.9761	NaN	NaN
70	0.7	beta	2	-0.216528	0.30104	0.18549	-1.09393	NaN	NaN	10.0933	14.021	13.2123	14.4408	NaN	NaN
80	0.7	beta	2	-0.667297	-0.32254	0.284505	-1.22963	NaN	NaN	9.66186	13.0472	11.6969	13.2891	NaN	NaN
90	0.7	beta	2	0.25999	0.83176	-0.213525	-0.610556	NaN	NaN	9.09374	12.0689	10.7934	12.9899	NaN	NaN
100	0.7	beta	2	0.871069	0.86135	0.57055	0.836373	NaN	NaN	8.72645	11.4103	10.0688	12.3179	NaN	NaN
5	0.8	beta	2	19.7924	25.5002	9.98892	7.12535	NaN	NaN	34.6228	51.3245	78.8042	46.1356	NaN	NaN
10	0.8	beta	2	6.36854	9.92445	10.9349	-1.89408	NaN	NaN	29.2773	42.0978	71.9684	37.0086	NaN	NaN
20	0.8	beta	2	2.38289	4.31951	5.04354	-2.2538	NaN	NaN	21.9257	32.8169	44.7933	27.3628	NaN	NaN
30	0.8	beta	2	0.443105	1.73821	3.44903	-2.59858	NaN	NaN	18.7236	27.9202	37.4698	22.7416	NaN	NaN
40	0.8	beta	2	0.980095	2.50343	0.938165	-1.92959	NaN	NaN	15.9658	23.7919	24.2019	19.4742	NaN	NaN
50	0.8	beta	2	0.377171	0.5248	2.07002	-0.419364	NaN	NaN	13.9949	20.9048	20.1505	17.7375	NaN	NaN
60	0.8	beta	2	0.556961	1.3472	0.80178	-1.05159	NaN	NaN	13.0429	19.7739	18.0152	15.8528	NaN	NaN
70	0.8	beta	2	0.316394	1.00452	0.59331	-1.0853	NaN	NaN	11.9753	18.3203	16.136	14.6948	NaN	NaN
80	0.8	beta	2	0.636951	1.35853	0.36893	-0.69973	NaN	NaN	11.3285	17.2544	14.5857	13.226	NaN	NaN
90	0.8	beta	2	0.494384	1.08566	0.261235	-0.590158	NaN	NaN	10.2492	15.4694	13.327	12.6986	NaN	NaN
100	0.8	beta	2	0.204742	0.87401	0.07454	-0.955086	NaN	NaN	10.0319	15.1649	12.3529	11.6854	NaN	NaN
5	0.9	beta	2	42.2045	51.7779	4.74625	22.2919	NaN	NaN	50.628	72.6482	70.3065	52.4296	NaN	NaN
10	0.9	beta	2	23.627	32.2642	8.44046	3.29206	NaN	NaN	39.804	63.3782	86.5092	34.79	NaN	NaN
20	0.9	beta	2	11.0481	17.5413	8.41772	-3.95412	NaN	NaN	33.6472	53.9371	73.8573	27.4275	NaN	NaN
30	0.9	beta	2	9.60455	15.9509	3.01032	-3.46598	NaN	NaN	28.6793	46.4763	61.8749	23.2032	NaN	NaN
40	0.9	beta	2	6.77449	12.5403	-0.15489	-4.25015	NaN	NaN	25.0635	40.5096	44.2889	20.4224	NaN	NaN
50	0.9	beta	2	6.57568	11.9647	-2.25174	-3.35481	NaN	NaN	22.912	37.2292	30.4847	18.2742	NaN	NaN
60	0.9	beta	2	6.22545	10.4524	-1.86868	-1.49666	NaN	NaN	19.913	32.7575	24.8481	16.8402	NaN	NaN
70	0.9	beta	2	5.50746	10.0858	-2.84104	-2.39179	NaN	NaN	18.2131	30.4966	23.0045	14.2623	NaN	NaN
80	0.9	beta	2	4.96353	9.55596	-3.00592	-2.83518	NaN	NaN	17.8351	29.7262	22.2085	13.5292	NaN	NaN
90	0.9	beta	2	4.39013	7.88904	-1.98094	-1.76323	NaN	NaN	16.2117	27.5239	20.5734	13.196	NaN	NaN
100	0.9	beta	2	4.71704	8.74668	-3.50579	-1.87371	NaN	NaN	14.9288	24.998	17.4012	12.3338	NaN	NaN
5	0.1	beta	3	3.04357	7.4563	6.54659	0.187987	NaN	NaN	71.8044	59.4526	52.9951	81.6011	NaN	NaN
10	0.1	beta	3	0.430798	2.84657	1.56999	-0.429245	NaN	NaN	47.4491	39.3121	29.4665	55.6585	NaN	NaN
20	0.1	beta	3	0.158257	0.89078	0.312717	0.0551907	NaN	NaN	34.5817	26.1399	19.9613	42.0302	NaN	NaN
30	0.1	beta	3	-0.560413	-0.11854	0.317213	-0.617231	NaN	NaN	27.3636	20.6059	16.5307	33.6135	NaN	NaN
40	0.1	beta	3	-0.204294	0.10993	0.123293	-0.374363	NaN	NaN	24.8496	17.9596	15.4721	30.7479	NaN	NaN
50	0.1	beta	3	-0.612861	-0.53139	0.281693	-0.598816	NaN	NaN	21.27	15.531	13.3928	26.5787	NaN	NaN
60	0.1	beta	3	-0.562097	-0.71018	0.346303	-0.447612	NaN	NaN	19.8103	14.4138	12.4831	24.7746	NaN	NaN
70	0.1	beta	3	0.198499	-0.12756	0.544487	0.402162	NaN	NaN	17.8571	13.059	11.4317	22.4604	NaN	NaN
80	0.1	beta	3	0.571775	0.36787	0.413053	0.712444	NaN	NaN	16.9624	12.6444	10.6629	21.2302	NaN	NaN
90	0.1	beta	3	0.029176	0.56173	-0.3659	-0.182029	NaN	NaN	16.2374	11.7736	9.72716	20.2418	NaN	NaN
100	0.1	beta	3	0.477165	-0.21102	0.733323	0.8204	NaN	NaN	15.77	11.2081	10.1103	19.9095	NaN	NaN
5	0.2	beta	3	3.03534	6.19858	9.72206	-1.72034	NaN	NaN	85.7048	61.4788	72.677	82.91	NaN	NaN
10	0.2	beta	3	1.72645	3.42756	3.09767	1.06395	NaN	NaN	46.5516	39.4296	31.6976	54.8423	NaN	NaN
20	0.2	beta	3	0.981081	0.80926	1.58692	1.1123	NaN	NaN	34.325	25.4278	21.6176	42.1066	NaN	NaN
30	0.2	beta	3	-0.250212	-0.0451	0.60465	-0.30007	NaN	NaN	28.1283	21.069	17.5647	34.832	NaN	NaN
40	0.2	beta	3	0.23949	0.20762	0.63433	0.300509	NaN	NaN	23.7513	18.1346	15.2491	29.483	NaN	NaN
50	0.2	beta	3	0.211718	-0.23826	0.82214	0.425155	NaN	NaN	21.9646	16.3447	14.1273	27.2894	NaN	NaN
60	0.2	beta	3	0.671498	0.87778	0.122757	0.602588	NaN	NaN	19.9712	14.9431	12.3517	24.8216	NaN	NaN
70	0.2	beta	3	-0.630543	0.33439	-0.574067	-1.07001	NaN	NaN	17.6173	13.7241	11.5308	22.0003	NaN	NaN
80	0.2	beta	3	0.738505	0.63407	0.399543	0.822564	NaN	NaN	16.8582	13.1982	10.9353	21.007	NaN	NaN
90	0.2	beta	3	-0.389307	-0.04814	-0.109843	-0.555735	NaN	NaN	15.9072	12.0414	10.6767	20.1093	NaN	NaN
100	0.2	beta	3	0.611502	0.33235	0.420503	0.757303	NaN	NaN	15.8641	11.7368	9.92228	19.825	NaN	NaN
5	0.3	beta	3	0.0214102	4.19234	15.6697	-4.87596	NaN	NaN	71.7701	60.6866	109.79	79.4872	NaN	NaN
10	0.3	beta	3	-1.84282	0.44206	3.92746	-3.4911	NaN	NaN	49.1472	38.4415	60.2832	58.4931	NaN	NaN
20	0.3	beta	3	0.830079	0.07067	2.27769	0.927788	NaN	NaN	36.3077	27.2258	24.3664	43.8892	NaN	NaN
30	0.3	beta	3	0.11492	-0.28242	1.27744	0.126109	NaN	NaN	27.8698	20.7585	19.8586	35.0394	NaN	NaN
40	0.3	beta	3	0.316461	0.60632	0.44569	0.118314	NaN	NaN	24.1165	18.891	16.2897	29.9139	NaN	NaN
50	0.3	beta	3	0.84355	0.2664	0.952677	1.04206	NaN	NaN	21.8535	16.2183	15.1463	27.6851	NaN	NaN
60	0.3	beta	3	-0.344871	-0.16357	0.228133	-0.489606	NaN	NaN	20.0745	15.2578	13.507	25.1626	NaN	NaN
70	0.3	beta	3	-0.596088	-0.20184	-0.0159333	-0.86199	NaN	NaN	18.028	13.9674	12.9723	22.9752	NaN	NaN
80	0.3	beta	3	0.37707	0.3299	0.283073	0.335705	NaN	NaN	17.8741	13.6768	12.2376	22.5886	NaN	NaN
90	0.3	beta	3	0.636102	0.75166	0.216357	0.54527	NaN	NaN	15.6619	12.4858	11.1874	19.9892	NaN	NaN
100	0.3	beta	3	0.468781	0.39696	0.205247	0.431403	NaN	NaN	16.5162	11.7969	11.0514	20.7984	NaN	NaN
5	0.4	beta	3	2.05266	4.36771	16.2765	-2.45034	NaN	NaN	69.363	59.8499	83.2715	78.6121	NaN	NaN
10	0.4	beta	3	-0.437424	1.87208	5.66617	-2.88744	NaN	NaN	47.1272	40.3292	52.4312	56.5653	NaN	NaN
20	0.4	beta	3	-0.786532	0.25849	1.71266	-1.81425	NaN	NaN	32.7081	27.7162	29.3736	40.3591	NaN	NaN
30	0.4	beta	3	0.794186	0.42625	1.64135	0.705231	NaN	NaN	27.3911	22.3244	21.0449	34.2319	NaN	NaN
40	0.4	beta	3	0.574493	1.42693	0.163457	0.0663914	NaN	NaN	23.4471	19.6699	16.7439	29.3599	NaN	NaN
50	0.4	beta	3	-0.1129	-0.94887	1.35493	0.0551612	NaN	NaN	22.8387	17.6879	16.8075	28.8877	NaN	NaN
60	0.4	beta	3	-0.714247	-0.23806	0.145887	-1.00891	NaN	NaN	19.1742	15.7423	13.8395	24.0661	NaN	NaN
70	0.4	beta	3	0.543374	0.50112	0.366973	0.394323	NaN	NaN	19.7502	15.33	14.1622	25.092	NaN	NaN
80	0.4	beta	3	0.26934	0.18973	0.551573	0.209755	NaN	NaN	16.7842	14.3358	12.7975	21.1811	NaN	NaN
90	0.4	beta	3	-0.916926	-0.60551	0.0360933	-1.17194	NaN	NaN	16.0289	12.863	12.1981	20.5059	NaN	NaN
100	0.4	beta	3	0.655501	0.71178	0.220727	0.55216	NaN	NaN	15.6991	12.7072	11.4481	20.0001	NaN	NaN
5	0.5	beta	3	0.718626	6.59359	23.3377	-7.3835	NaN	NaN	66.9827	61.4622	132.061	76.4665	NaN	NaN
10	0.5	beta	3	-1.61486	1.55555	7.41361	-5.40737	NaN	NaN	46.4863	43.6043	58.3004	54.5928	NaN	NaN
20	0.5	beta	3	-0.679879	-0.6133	3.00586	-1.81688	NaN	NaN	33.8142	29.0372	31.156	41.9833	NaN	NaN
30	0.5	beta	3	-0.573954	0.41905	1.72656	-1.5798	NaN	NaN	25.191	25.7105	23.7968	31.3364	NaN	NaN
40	0.5	beta	3	-0.175417	0.15047	0.87102	-0.834241	NaN	NaN	24.9928	21.1467	20.6691	31.8488	NaN	NaN
50	0.5	beta	3	-1.10231	-0.12064	0.124673	-1.83734	NaN	NaN	20.8944	18.8353	17.089	26.4804	NaN	NaN
60	0.5	beta	3	-0.357614	0.21522	0.34294	-0.947454	NaN	NaN	18.9677	17.2363	16.7589	24.3582	NaN	NaN
70	0.5	beta	3	-0.0582253	-0.27647	0.80307	-0.0968638	NaN	NaN	18.2193	15.7938	14.2019	23.1055	NaN	NaN
80	0.5	beta	3	0.210788	0.56048	0.299553	-0.149501	NaN	NaN	16.3523	14.9182	13.9383	21.2053	NaN	NaN
90	0.5	beta	3	-0.0765304	0.2871	0.36688	-0.397293	NaN	NaN	15.6433	15.1737	13.0177	19.6637	NaN	NaN
100	0.5	beta	3	0.293174	0.39861	0.364493	0.0559474	NaN	NaN	15.3683	13.6235	12.9492	19.9255	NaN	NaN
5	0.6	beta	3	4.57711	10.199	38.6444	-8.44451	NaN	NaN	60.1267	61.1449	196.194	67.9028	NaN	NaN
10	0.6	beta	3	0.121131	0.794044	14.6874	-4.74971	NaN	NaN	48.2806	45.4439	81.8197	56.845	NaN	NaN
20	0.6	beta	3	-0.35535	0.47056	3.62244	-2.25971	NaN	NaN	34.9439	32.8171	34.8181	42.9898	NaN	NaN
30	0.6	beta	3	-0.614404	0.27888	2.29121	-1.89062	NaN	NaN	26.9761	27.5904	26.8953	33.8347	NaN	NaN
40	0.6	beta	3	0.0812143	0.74185	1.37823	-0.892247	NaN	NaN	22.779	22.6869	22.503	29.482	NaN	NaN
50	0.6	beta	3	-0.481882	-0.28388	1.48522	-1.1485	NaN	NaN	20.883	21.2688	20.6317	26.8937	NaN	NaN
60	0.6	beta	3	-0.222287	0.95842	0.0601467	-1.29253	NaN	NaN	19.2415	18.9294	18.488	25.3599	NaN	NaN
70	0.6	beta	3	-0.156877	1.07061	-0.102167	-1.11697	NaN	NaN	17.9987	17.8688	16.3567	23.1763	NaN	NaN
80	0.6	beta	3	0.416316	1.11402	0.297797	-0.23616	NaN	NaN	16.6973	17.0936	15.4972	21.4749	NaN	NaN
90	0.6	beta	3	-0.150347	0.75036	-0.0519067	-0.951334	NaN	NaN	15.997	15.7288	15.4783	21.1452	NaN	NaN
100	0.6	beta	3	0.406565	0.65727	0.449727	0.00439373	NaN	NaN	15.5378	15.165	14.1482	20.2451	NaN	NaN
5	0.7	beta	3	11.854	23.6442	18.6671	-3.28114	NaN	NaN	62.7654	66.0889	109.976	69.6284	NaN	NaN
10	0.7	beta	3	6.50737	12.3859	19.4235	-2.49608	NaN	NaN	50.5342	53.7762	156.467	59.4551	NaN	NaN
20	0.7	beta	3	-0.280686	2.9342	6.20159	-4.38678	NaN	NaN	34.3851	38.9897	57.4005	42.7838	NaN	NaN
30	0.7	beta	3	-0.363766	1.77776	3.03713	-3.10076	NaN	NaN	27.5846	32.1242	33.4896	34.1738	NaN	NaN
40	0.7	beta	3	0.299371	1.13328	3.00433	-1.52609	NaN	NaN	24.8558	28.9849	29.5916	31.6667	NaN	NaN
50	0.7	beta	3	-0.162493	2.54855	-0.0400267	-2.40249	NaN	NaN	21.5468	25.0949	23.3127	27.3263	NaN	NaN
60	0.7	beta	3	0.458269	0.71264	1.89729	-0.428991	NaN	NaN	20.0034	22.9664	21.6718	25.6579	NaN	NaN
70	0.7	beta	3	-0.374891	1.63744	0.10155	-2.06139	NaN	NaN	17.2905	21.7412	20.2254	22.6395	NaN	NaN
80	0.7	beta	3	-0.843635	0.30855	0.46886	-2.00262	NaN	NaN	16.8721	20.0557	18.4662	21.8589	NaN	NaN
90	0.7	beta	3	0.494223	2.10333	-0.214647	-0.797016	NaN	NaN	16.3686	19.113	16.9011	21.2825	NaN	NaN
100	0.7	beta	3	1.4798	1.95246	0.739303	0.826421	NaN	NaN	15.4243	18.1844	15.9048	19.9541	NaN	NaN
5	0.8	beta	3	26.8515	52.3694	16.6605	-0.4354	NaN	NaN	61.9064	90.9306	132.943	62.9521	NaN	NaN
10	0.8	beta	3	9.38751	24.5695	19.3191	-6.22152	NaN	NaN	47.759	67.7022	125.256	57.5126	NaN	NaN
20	0.8	beta	3	4.31005	12.9321	9.63775	-4.81046	NaN	NaN	33.2473	50.8495	80.4184	41.0078	NaN	NaN
30	0.8	beta	3	0.81674	6.22391	7.48048	-5.02443	NaN	NaN	27.7872	42.9627	72.2306	34.6655	NaN	NaN
40	0.8	beta	3	1.58131	7.68754	1.47386	-3.85439	NaN	NaN	24.6827	37.4133	40.3342	30.8059	NaN	NaN
50	0.8	beta	3	1.27571	3.18384	3.45271	-1.4338	NaN	NaN	22.5173	32.661	32.2897	28.0962	NaN	NaN
60	0.8	beta	3	1.11786	3.84124	1.89979	-1.74268	NaN	NaN	20.6283	30.6379	28.9831	25.7681	NaN	NaN
70	0.8	beta	3	0.202601	3.22461	0.77077	-2.56183	NaN	NaN	18.4533	28.2949	25.1905	23.6686	NaN	NaN
80	0.8	beta	3	0.692641	3.03033	1.07473	-1.45728	NaN	NaN	17.0639	26.7906	22.875	21.1659	NaN	NaN
90	0.8	beta	3	0.445154	2.36634	0.846597	-1.33193	NaN	NaN	15.837	24.3584	20.6839	19.8038	NaN	NaN
100	0.8	beta	3	0.441228	2.11274	0.904897	-1.12988	NaN	NaN	15.3104	23.889	19.5564	18.8707	NaN	NaN
5	0.9	beta	3	63.208	99.2659	14.3418	25.0597	NaN	NaN	84.5448	139.214	122	71.5061	NaN	NaN
10	0.9	beta	3	34.1598	67.7555	21.9734	-1.0058	NaN	NaN	60.0395	116.559	170.311	52.2769	NaN	NaN
20	0.9	beta	3	15.915	41.0744	21.4345	-8.15004	NaN	NaN	43.3757	94.3725	149.233	41.5427	NaN	NaN
30	0.9	beta	3	12.2906	35.0442	7.27685	-6.75541	NaN	NaN	35.5438	80.1568	112.445	34.8774	NaN	NaN
40	0.9	beta	3	8.27621	26.3002	2.88134	-6.2967	NaN	NaN	31.3397	68.0841	78.0093	32.0047	NaN	NaN
50	0.9	beta	3	7.46693	24.8723	-1.06887	-5.81734	NaN	NaN	28.7264	64.6054	54.1663	28.9156	NaN	NaN
60	0.9	beta	3	8.05727	21.6885	-1.6695	-2.44506	NaN	NaN	25.7489	55.7471	39.595	27.0288	NaN	NaN
70	0.9	beta	3	6.70049	20.8066	-2.94957	-3.37561	NaN	NaN	22.0792	51.5558	37.6082	22.4772	NaN	NaN
80	0.9	beta	3	5.16052	18.6738	-2.73424	-4.38072	NaN	NaN	21.6991	49.7757	36.7267	21.6504	NaN	NaN
90	0.9	beta	3	5.5232	16.6266	-2.21159	-2.68058	NaN	NaN	20.0685	45.9612	33.1824	21.471	NaN	NaN
100	0.9	beta	3	4.74485	16.0106	-4.03918	-2.92674	NaN	NaN	18.6865	41.8957	28.4528	19.6986	NaN	NaN
5	0.1	beta	4	3.73802	13.6046	4.9025	-5.9368	NaN	NaN	107.992	82.2295	63.825	97.8542	NaN	NaN
10	0.1	beta	4	1.31276	5.87739	0.452933	-3.05565	NaN	NaN	71.0907	52.7387	35.9464	67.751	NaN	NaN
20	0.1	beta	4	0.720188	1.5712	-0.402933	-1.14994	NaN	NaN	52.1911	33.2221	24.9726	54.0345	NaN	NaN
30	0.1	beta	4	-1.47848	0.22512	-1.05244	-3.00633	NaN	NaN	40.6419	26.3185	20.9473	42.8803	NaN	NaN
40	0.1	beta	4	-0.710025	-0.03044	-0.652038	-2.0878	NaN	NaN	39.1134	22.8248	19.5959	39.713	NaN	NaN
50	0.1	beta	4	-1.04048	-0.48802	-0.406325	-1.95595	NaN	NaN	30.9748	19.4254	17.1263	33.4059	NaN	NaN
60	0.1	beta	4	-0.343573	-0.24848	-0.269255	-1.12641	NaN	NaN	29.833	18.3484	16.4265	32.2091	NaN	NaN
70	0.1	beta	4	0.397189	-0.12066	0.247762	-0.175497	NaN	NaN	27.5432	16.6612	15.1723	29.6798	NaN	NaN
80	0.1	beta	4	0.589465	0.3662	-0.0127975	0.0140311	NaN	NaN	26.6982	16.0169	14.3823	28.8197	NaN	NaN
90	0.1	beta	4	0.130566	0.76429	-0.747212	-0.495265	NaN	NaN	25.5177	14.8814	13.2072	27.591	NaN	NaN
100	0.1	beta	4	0.955053	0.0805	0.389452	0.536698	NaN	NaN	24.8757	14.1741	13.6218	26.6946	NaN	NaN
5	0.2	beta	4	5.36741	10.8488	10.9995	-9.27137	NaN	NaN	161.412	85.6389	93.9136	95.9015	NaN	NaN
10	0.2	beta	4	0.965664	5.05103	1.71551	-3.46376	NaN	NaN	70.0336	51.0152	38.1173	67.9325	NaN	NaN
20	0.2	beta	4	0.273306	0.86916	0.224715	-2.02751	NaN	NaN	54.0579	32.8328	26.8637	54.33	NaN	NaN
30	0.2	beta	4	0.448642	0.97079	-0.222493	-1.12619	NaN	NaN	43.7137	26.9886	22.4089	46.0439	NaN	NaN
40	0.2	beta	4	0.562388	0.47514	0.0900475	-0.620424	NaN	NaN	37.447	23.1812	19.9108	39.2719	NaN	NaN
50	0.2	beta	4	0.807275	0.00854	0.319395	-0.220931	NaN	NaN	36.3365	20.7153	18.8634	37.4175	NaN	NaN
60	0.2	beta	4	0.800649	1.15754	-0.48969	-0.152267	NaN	NaN	32.5267	18.9305	16.5694	33.8761	NaN	NaN
70	0.2	beta	4	-1.41135	0.69339	-1.4427	-2.35708	NaN	NaN	25.404	17.2316	14.7081	27.9255	NaN	NaN
80	0.2	beta	4	1.4258	1.29305	0.0706125	0.834988	NaN	NaN	26.4475	16.9609	14.5757	28.6326	NaN	NaN
90	0.2	beta	4	-0.957012	0.27117	-0.969113	-1.7902	NaN	NaN	24.2106	15.1409	14.4118	26.5708	NaN	NaN
100	0.2	beta	4	1.28144	0.62107	0.268575	0.810269	NaN	NaN	26.3439	14.9243	13.4811	27.6843	NaN	NaN
5	0.3	beta	4	3.98819	10.6809	20.714	-9.15546	NaN	NaN	121.167	84.1518	152.893	96.0823	NaN	NaN
10	0.3	beta	4	-1.06118	2.30241	3.81403	-6.7754	NaN	NaN	79.966	50.537	82.6463	74.8834	NaN	NaN
20	0.3	beta	4	2.34958	0.83404	1.80828	-0.500096	NaN	NaN	60.1235	33.9997	30.8	56.5148	NaN	NaN
30	0.3	beta	4	-0.234509	-0.30075	0.385947	-2.12778	NaN	NaN	43.3118	25.5652	24.784	44.3076	NaN	NaN
40	0.3	beta	4	0.186108	1.77105	-0.799673	-1.42473	NaN	NaN	36.8812	23.7878	20.6307	38.2886	NaN	NaN
50	0.3	beta	4	0.918248	0.12103	0.614167	-0.146498	NaN	NaN	33.7315	20.3598	19.6177	35.5608	NaN	NaN
60	0.3	beta	4	0.0493364	0.30265	-0.275738	-1.06856	NaN	NaN	33.8297	19.2468	17.7627	34.743	NaN	NaN
70	0.3	beta	4	-0.511442	-0.02246	-0.404055	-1.51864	NaN	NaN	28.5505	17.4419	17.157	30.7409	NaN	NaN
80	0.3	beta	4	0.880448	0.74218	-0.055115	0.0865508	NaN	NaN	28	17.5957	16.2402	30.2764	NaN	NaN
90	0.3	beta	4	1.06117	1.04497	0.0054125	0.412676	NaN	NaN	24.8136	15.7533	14.6536	27.1031	NaN	NaN
100	0.3	beta	4	0.662294	0.58095	-0.260035	-0.170221	NaN	NaN	30.199	14.8958	15.0587	29.2384	NaN	NaN
5	0.4	beta	4	1.21372	8.66882	20.7546	-11.0721	NaN	NaN	96.7702	83.3596	111.576	90.7641	NaN	NaN
10	0.4	beta	4	-2.13977	4.26256	4.22035	-8.63158	NaN	NaN	68.3996	51.6665	64.1185	67.041	NaN	NaN
20	0.4	beta	4	0.765	2.49929	1.22198	-2.58501	NaN	NaN	51.6656	35.5205	36.8143	52.3968	NaN	NaN
30	0.4	beta	4	1.02538	0.5564	1.30824	-0.924917	NaN	NaN	41.5589	28.3259	26.388	43.5038	NaN	NaN
40	0.4	beta	4	0.66366	1.9958	-0.315975	-0.967295	NaN	NaN	37.1516	25.5159	21.4486	39.1329	NaN	NaN
50	0.4	beta	4	0.70709	-0.96402	1.19513	-0.638982	NaN	NaN	38.1693	22.693	22.0353	39.329	NaN	NaN
60	0.4	beta	4	-1.49351	0.06915	-0.739718	-2.66229	NaN	NaN	28.4122	20.1666	17.7495	30.9172	NaN	NaN
70	0.4	beta	4	0.737556	0.84321	-0.28408	-0.421934	NaN	NaN	31.9778	19.3905	18.4152	34.0093	NaN	NaN
80	0.4	beta	4	-0.423001	0.12039	-0.152078	-1.36034	NaN	NaN	25.5679	17.7289	16.6051	27.5405	NaN	NaN
90	0.4	beta	4	-1.08153	-0.2952	-0.43	-2.03258	NaN	NaN	25.1734	16.7007	16.1154	26.8597	NaN	NaN
100	0.4	beta	4	1.11732	1.17052	-0.0543925	0.419316	NaN	NaN	24.3586	15.9478	15.0401	26.7031	NaN	NaN
5	0.5	beta	4	2.16566	12.5788	33.8246	-14.2066	NaN	NaN	106.523	80.0354	229.064	94.3539	NaN	NaN
10	0.5	beta	4	-1.91112	5.24697	8.24808	-10.1651	NaN	NaN	69.5993	57.6158	74.6572	66.4912	NaN	NaN
20	0.5	beta	4	-1.4601	-0.65814	2.49325	-5.59702	NaN	NaN	51.8985	36.1873	38.281	51.8436	NaN	NaN
30	0.5	beta	4	-1.07904	1.58625	0.98359	-3.9397	NaN	NaN	38.4367	32.753	29.432	40.0284	NaN	NaN
40	0.5	beta	4	-0.378469	1.19704	-0.285423	-2.5726	NaN	NaN	37.8207	26.37	24.8159	40.2792	NaN	NaN
50	0.5	beta	4	-1.30709	0.48597	-0.415202	-3.07203	NaN	NaN	32.1665	23.66	21.722	34.5829	NaN	NaN
60	0.5	beta	4	-0.67638	0.27536	-0.016945	-2.2211	NaN	NaN	29.6988	21.6859	21.0066	31.5133	NaN	NaN
70	0.5	beta	4	0.0925871	0.43943	0.150698	-0.917785	NaN	NaN	27.9383	20.144	17.8069	30.3892	NaN	NaN
80	0.5	beta	4	0.637413	1.20142	0.0678925	-0.420289	NaN	NaN	25.3807	18.9998	17.6702	27.8834	NaN	NaN
90	0.5	beta	4	0.0691638	0.64718	0.07164	-0.924234	NaN	NaN	24.7973	18.642	16.9735	26.9331	NaN	NaN
100	0.5	beta	4	-0.0478877	0.57269	-0.146063	-1.00747	NaN	NaN	24.0568	17.1639	16.2177	25.9399	NaN	NaN
5	0.6	beta	4	2.45855	17.5182	45.8083	-17.7112	NaN	NaN	85.3062	81.375	246.831	76.4892	NaN	NaN
10	0.6	beta	4	0.862198	3.33338	19.9678	-11.0188	NaN	NaN	74.688	56.9795	117.137	66.4822	NaN	NaN
20	0.6	beta	4	0.144996	2.57511	3.35929	-5.01804	NaN	NaN	56.8705	42.297	42.5706	54.2064	NaN	NaN
30	0.6	beta	4	-0.448999	2.05612	2.03198	-3.6751	NaN	NaN	39.3988	35.0148	32.8129	42.2137	NaN	NaN
40	0.6	beta	4	0.152436	1.45719	1.03694	-2.47028	NaN	NaN	36.6653	28.3665	28.0958	38.687	NaN	NaN
50	0.6	beta	4	-0.422144	0.42146	0.905088	-2.62615	NaN	NaN	34.928	26.6492	25.4591	36.3118	NaN	NaN
60	0.6	beta	4	0.0511879	1.96325	-0.337222	-1.93325	NaN	NaN	29.7812	23.7148	22.8521	32.7581	NaN	NaN
70	0.6	beta	4	0.415414	2.07976	-0.29497	-1.27785	NaN	NaN	28.4383	22.3854	20.7388	30.5658	NaN	NaN
80	0.6	beta	4	-0.078545	1.46113	-0.0651725	-1.59534	NaN	NaN	24.9234	21.7418	19.9764	27.3543	NaN	NaN
90	0.6	beta	4	-0.277354	1.03511	-0.2748	-1.80564	NaN	NaN	26.4882	19.9188	19.6418	28.296	NaN	NaN
100	0.6	beta	4	0.837336	1.09184	0.356602	-0.293305	NaN	NaN	24.5996	18.902	18.1874	26.8718	NaN	NaN
5	0.7	beta	4	14.264	37.076	22.0126	-9.41072	NaN	NaN	103.368	92.0677	135.51	82.1103	NaN	NaN
10	0.7	beta	4	9.71959	21.2021	23.2275	-5.19972	NaN	NaN	85.5384	71.4006	217.573	76.5631	NaN	NaN
20	0.7	beta	4	-0.57157	6.91822	6.30207	-7.79824	NaN	NaN	49.7027	49.246	72.9341	51.4953	NaN	NaN
30	0.7	beta	4	-0.182448	3.85188	3.43403	-5.5251	NaN	NaN	44.3928	40.6156	42.5713	43.4665	NaN	NaN
40	0.7	beta	4	-0.151206	2.50997	2.95131	-4.26752	NaN	NaN	37.4948	36.9529	36.795	39.6761	NaN	NaN
50	0.7	beta	4	-0.239647	4.68677	-0.4845	-3.64914	NaN	NaN	31.2925	31.6572	28.9351	33.84	NaN	NaN
60	0.7	beta	4	0.710648	1.91095	1.7544	-1.74856	NaN	NaN	30.4596	28.9638	27.4361	32.8389	NaN	NaN
70	0.7	beta	4	-1.61217	2.20549	-0.351535	-4.23763	NaN	NaN	25.7402	27.2795	25.3769	28.7231	NaN	NaN
80	0.7	beta	4	-0.514475	1.27244	0.477677	-2.62701	NaN	NaN	26.906	25.1501	23.6325	28.7319	NaN	NaN
90	0.7	beta	4	0.305933	3.09355	-0.583355	-1.60872	NaN	NaN	24.432	23.6718	20.8709	27.1185	NaN	NaN
100	0.7	beta	4	2.24282	2.59071	1.06364	0.895811	NaN	NaN	24.2752	23.0039	19.9278	26.6168	NaN	NaN
5	0.8	beta	4	29.3053	77.3644	21.8978	-6.62585	NaN	NaN	100.806	127.2	174.876	77.7369	NaN	NaN
10	0.8	beta	4	9.1983	36.9891	26.5714	-11.062	NaN	NaN	65.9016	89.9047	167.396	67.1582	NaN	NaN
20	0.8	beta	4	4.06728	20.1685	12.5726	-8.50385	NaN	NaN	48.3223	65.6873	109.101	50.5764	NaN	NaN
30	0.8	beta	4	1.1871	11.6621	9.11888	-7.50049	NaN	NaN	40.8873	54.7004	100.001	43.803	NaN	NaN
40	0.8	beta	4	1.20013	11.1735	2.10011	-5.93583	NaN	NaN	38.267	47.46	51.1586	38.717	NaN	NaN
50	0.8	beta	4	1.18023	6.32988	3.00633	-3.78201	NaN	NaN	33.6604	41.2889	39.637	35.963	NaN	NaN
60	0.8	beta	4	2.08985	5.60007	3.17643	-2.18943	NaN	NaN	32.9365	38.5121	36.5119	34.057	NaN	NaN
70	0.8	beta	4	0.240082	5.39336	1.07525	-3.70972	NaN	NaN	27.6157	35.5732	31.7686	30.4319	NaN	NaN
80	0.8	beta	4	0.334391	4.63886	1.05539	-2.83866	NaN	NaN	25.121	33.5542	28.3904	27.5454	NaN	NaN
90	0.8	beta	4	-0.0129919	3.95282	0.593122	-2.88058	NaN	NaN	24.0423	30.9524	26.1639	25.7128	NaN	NaN
100	0.8	beta	4	-0.448773	3.56869	0.20063	-2.99689	NaN	NaN	21.9333	29.7577	23.9663	24.3936	NaN	NaN
5	0.9	beta	4	72.8721	148.697	19.8203	18.8356	NaN	NaN	118.053	207.909	165.021	79.7765	NaN	NaN
10	0.9	beta	4	38.255	103.213	31.2929	-5.61516	NaN	NaN	88.4358	169.227	243.059	61.9699	NaN	NaN
20	0.9	beta	4	17.0459	65.1788	25.8524	-11.3986	NaN	NaN	55.7801	132.581	198.948	50.2476	NaN	NaN
30	0.9	beta	4	11.8411	54.841	11.7745	-10.3184	NaN	NaN	41.9077	113.305	162.349	40.8927	NaN	NaN
40	0.9	beta	4	8.54688	42.509	5.84499	-8.69264	NaN	NaN	40.8383	96.006	116.218	40.3422	NaN	NaN
50	0.9	beta	4	7.49249	36.0775	1.88923	-6.75975	NaN	NaN	35.6197	87.6742	74.7031	37.1339	NaN	NaN
60	0.9	beta	4	8.09768	31.9699	-1.59443	-3.73257	NaN	NaN	34.9078	76.2218	48.8872	34.9289	NaN	NaN
70	0.9	beta	4	5.26847	29.2002	-2.73195	-5.11854	NaN	NaN	26.684	68.5178	47.8912	28.6633	NaN	NaN
80	0.9	beta	4	4.70484	28.1331	-3.0887	-4.99258	NaN	NaN	26.4874	66.5584	45.4902	27.6089	NaN	NaN
90	0.9	beta	4	5.39919	24.9135	-2.46462	-3.71775	NaN	NaN	27.003	60.945	42.9378	27.4255	NaN	NaN
100	0.9	beta	4	4.66588	22.9016	-3.87357	-3.09904	NaN	NaN	25.7914	56.3539	36.5511	25.7028	NaN	NaN
5	0.1	beta	5	5.22544	20.2785	2.68514	-11.3819	NaN	NaN	147.569	104.491	70.3362	111.428	NaN	NaN
10	0.1	beta	5	3.604	9.38507	-0.93993	-5.13525	NaN	NaN	104.648	66.5695	40.6064	80.7537	NaN	NaN
20	0.1	beta	5	1.57754	2.06704	-1.29605	-3.07753	NaN	NaN	74.6571	39.2314	29.2879	62.7918	NaN	NaN
30	0.1	beta	5	-2.59862	0.34048	-2.60495	-5.67305	NaN	NaN	54.6668	31.3047	24.4622	50.5279	NaN	NaN
40	0.1	beta	5	-1.06678	0.38458	-2.12664	-4.105	NaN	NaN	56.3576	26.2278	22.9835	46.9111	NaN	NaN
50	0.1	beta	5	-2.52603	-0.41946	-2.00609	-4.61911	NaN	NaN	41.8436	22.9814	20.3009	39.3989	NaN	NaN
60	0.1	beta	5	0.116241	-0.0439	-1.07467	-2.11702	NaN	NaN	47.3034	21.1039	20.1943	40.4868	NaN	NaN
70	0.1	beta	5	0.483444	0.2793	-0.513892	-1.16963	NaN	NaN	37.6429	19.6023	18.0112	35.1148	NaN	NaN
80	0.1	beta	5	1.39519	0.69311	-0.410714	-0.189429	NaN	NaN	37.9708	18.5873	17.4535	35.3789	NaN	NaN
90	0.1	beta	5	-0.202749	0.70602	-1.47353	-1.60018	NaN	NaN	35.9284	17.2932	16.2372	33.7131	NaN	NaN
100	0.1	beta	5	1.22983	-0.01483	-0.092858	-0.268598	NaN	NaN	35.9048	16.343	16.8818	32.7448	NaN	NaN
5	0.2	beta	5	13.195	17.0668	11.4734	-14.2109	NaN	NaN	288.4	113.85	108.994	108.859	NaN	NaN
10	0.2	beta	5	-2.41387	6.55415	-1.20901	-10.0993	NaN	NaN	88.6964	63.1312	41.8696	75.0597	NaN	NaN
20	0.2	beta	5	-0.219887	2.05984	-1.53464	-4.74566	NaN	NaN	67.333	38.4595	29.9627	59.7953	NaN	NaN
30	0.2	beta	5	1.003	0.678	-0.680636	-2.6894	NaN	NaN	60.5284	30.5457	26.5295	54.0844	NaN	NaN
40	0.2	beta	5	1.09114	1.07885	-0.75437	-1.81109	NaN	NaN	52.7069	27.6762	23.2736	46.4795	NaN	NaN
50	0.2	beta	5	2.10057	-0.06921	-0.104554	-0.90478	NaN	NaN	56.1452	23.8441	22.8458	46.4791	NaN	NaN
60	0.2	beta	5	-0.195237	0.97118	-1.59144	-2.19875	NaN	NaN	42.948	22.2412	19.3979	39.5308	NaN	NaN
70	0.2	beta	5	-2.95305	0.40344	-2.48964	-4.47273	NaN	NaN	33.6421	19.9539	17.6945	33.0106	NaN	NaN
80	0.2	beta	5	1.08174	1.44852	-0.754218	-0.479025	NaN	NaN	36.2131	19.8114	17.5175	34.2213	NaN	NaN
90	0.2	beta	5	-1.54995	0.16614	-1.73998	-3.09532	NaN	NaN	34.1175	17.2904	17.4228	32.4433	NaN	NaN
100	0.2	beta	5	1.25906	0.92423	-0.568686	-0.200488	NaN	NaN	39.4165	17.5678	16.0729	33.9872	NaN	NaN
5	0.3	beta	5	0.690266	14.8351	20.5382	-18.1119	NaN	NaN	146.43	102.128	183.197	96.4382	NaN	NaN
10	0.3	beta	5	0.652691	4.92426	3.00062	-9.82107	NaN	NaN	111.644	60.1286	99.9525	83.2578	NaN	NaN
20	0.3	beta	5	4.45544	1.28711	1.28428	-2.68395	NaN	NaN	93.3105	39.7048	36.2044	64.9855	NaN	NaN
30	0.3	beta	5	0.688166	0.06552	-0.532316	-3.76623	NaN	NaN	65.3121	30.2314	28.9366	53.3968	NaN	NaN
40	0.3	beta	5	-0.248382	2.29196	-2.23531	-3.44552	NaN	NaN	53.6998	27.419	24.2349	46.2157	NaN	NaN
50	0.3	beta	5	1.38328	0.69292	-0.083136	-1.26272	NaN	NaN	46.0904	23.9817	22.7636	41.2676	NaN	NaN
60	0.3	beta	5	0.935096	1.13935	-1.00311	-1.66815	NaN	NaN	51.9643	22.5845	21.1275	42.5161	NaN	NaN
70	0.3	beta	5	0.32993	0.45662	-1.14523	-2.12082	NaN	NaN	45.3987	20.2582	21.1813	39.639	NaN	NaN
80	0.3	beta	5	1.4665	0.93578	-0.559852	-0.546155	NaN	NaN	39.962	20.4575	19.8331	36.9105	NaN	NaN
90	0.3	beta	5	1.08107	1.19122	-0.626986	-0.53604	NaN	NaN	35.1235	18.5856	17.7694	33.0967	NaN	NaN
100	0.3	beta	5	1.97418	0.76175	-0.44561	-0.193648	NaN	NaN	54.2141	17.181	18.4944	37.3821	NaN	NaN
5	0.4	beta	5	0.606432	13.7536	22.6186	-18.0693	NaN	NaN	124.138	105.047	131.01	99.2812	NaN	NaN
10	0.4	beta	5	-1.65487	4.45307	5.72418	-13.3335	NaN	NaN	102.331	61.5054	78.1807	78.9143	NaN	NaN
20	0.4	beta	5	0.549068	3.14349	-0.33604	-5.35718	NaN	NaN	71.3805	41.2481	41.0247	61.8953	NaN	NaN
30	0.4	beta	5	-0.386464	1.34706	-0.515582	-4.24267	NaN	NaN	52.0035	32.9857	29.1273	48.3021	NaN	NaN
40	0.4	beta	5	0.892051	3.19822	-1.40359	-2.37757	NaN	NaN	53.2699	30.3114	24.9943	46.7644	NaN	NaN
50	0.4	beta	5	1.97046	-0.58449	0.352294	-1.71465	NaN	NaN	57.6718	26.2685	26.083	48.2176	NaN	NaN
60	0.4	beta	5	-1.51681	0.47723	-1.47839	-3.69513	NaN	NaN	39.7426	23.427	21.1221	37.5895	NaN	NaN
70	0.4	beta	5	1.64438	1.21375	-0.720094	-0.77951	NaN	NaN	44.8073	22.7374	21.6216	41.0343	NaN	NaN
80	0.4	beta	5	-0.515908	0.48309	-0.774254	-2.3817	NaN	NaN	35.3442	21.0663	19.4251	32.6517	NaN	NaN
90	0.4	beta	5	-1.17904	0.05087	-1.2184	-3.11427	NaN	NaN	38.1985	19.6218	19.3144	33.2979	NaN	NaN
100	0.4	beta	5	1.30506	1.70957	-0.802678	-0.347948	NaN	NaN	34.7324	18.6863	18.1195	32.4662	NaN	NaN
5	0.5	beta	5	6.38317	20.6531	47.0199	-18.4778	NaN	NaN	153.26	101.095	347.064	105.876	NaN	NaN
10	0.5	beta	5	-3.77719	9.01345	5.69546	-15.0217	NaN	NaN	88.2302	67.3111	82.3789	73.0046	NaN	NaN
20	0.5	beta	5	-1.35174	0.60646	0.93381	-9.4283	NaN	NaN	80.7698	41.9256	43.8422	60.9539	NaN	NaN
30	0.5	beta	5	-0.950869	3.6017	-0.318244	-5.79034	NaN	NaN	55.3584	38.7957	33.3175	48.1615	NaN	NaN
40	0.5	beta	5	-0.418138	1.80594	-1.07642	-4.13781	NaN	NaN	50.5307	30.9453	27.9735	46.4686	NaN	NaN
50	0.5	beta	5	-1.36112	0.97094	-1.12163	-4.44511	NaN	NaN	45.1963	27.3897	25.106	41.2717	NaN	NaN
60	0.5	beta	5	-1.35926	0.52916	-1.00943	-4.21738	NaN	NaN	41.9447	25.3282	24.2794	37.2648	NaN	NaN
70	0.5	beta	5	-0.611148	1.21215	-1.09639	-2.66028	NaN	NaN	37.1516	23.5024	20.4393	35.3548	NaN	NaN
80	0.5	beta	5	0.130224	1.76802	-0.978244	-1.88567	NaN	NaN	34.7551	21.8709	20.4066	33.2011	NaN	NaN
90	0.5	beta	5	0.0166115	1.40763	-0.68924	-1.90763	NaN	NaN	33.7662	21.6528	19.8805	31.6056	NaN	NaN
100	0.5	beta	5	-0.564217	0.81981	-1.01241	-2.36331	NaN	NaN	34.642	19.836	18.732	31.2968	NaN	NaN
5	0.6	beta	5	-0.900439	25.6937	44.8158	-24.5805	NaN	NaN	101.555	101.228	245.088	81.6145	NaN	NaN
10	0.6	beta	5	1.14699	7.86913	20.4827	-15.8369	NaN	NaN	100.161	70.123	134.644	73.2526	NaN	NaN
20	0.6	beta	5	-0.29155	4.23715	2.56645	-8.26199	NaN	NaN	75.9375	50.5508	47.047	60.5178	NaN	NaN
30	0.6	beta	5	-0.854463	2.72557	1.52025	-6.39166	NaN	NaN	54.1171	40.5359	37.6792	48.786	NaN	NaN
40	0.6	beta	5	-0.989516	2.7152	-0.77475	-5.54637	NaN	NaN	51.9315	33.4184	31.3798	45.4697	NaN	NaN
50	0.6	beta	5	-0.733888	1.46639	-0.42874	-4.78522	NaN	NaN	51.9951	30.9267	28.9243	43.2999	NaN	NaN
60	0.6	beta	5	0.594321	3.14731	-0.993224	-2.71974	NaN	NaN	41.8614	27.7322	26.5526	39.2294	NaN	NaN
70	0.6	beta	5	0.631957	2.84697	-0.91932	-2.17925	NaN	NaN	40.8584	26.2897	23.7349	36.6437	NaN	NaN
80	0.6	beta	5	0.0809435	1.64818	-0.282	-2.43596	NaN	NaN	34.7188	24.8644	23.215	32.6603	NaN	NaN
90	0.6	beta	5	-0.187051	1.06767	-0.720802	-2.90321	NaN	NaN	41.5012	22.6841	22.9295	34.9488	NaN	NaN
100	0.6	beta	5	1.83812	1.83367	0.154128	-0.41265	NaN	NaN	35.1791	22.238	21.3727	32.3449	NaN	NaN
5	0.7	beta	5	12.9644	48.2043	21.0479	-17.0155	NaN	NaN	144.612	112.848	141.628	87.4166	NaN	NaN
10	0.7	beta	5	10.2234	27.0148	28.111	-10.3767	NaN	NaN	123.875	85.8712	282.184	86.5275	NaN	NaN
20	0.7	beta	5	-2.52248	9.54521	5.71264	-12.5416	NaN	NaN	66.2252	57.1676	85.7769	57.5628	NaN	NaN
30	0.7	beta	5	-0.606733	6.16705	2.24111	-8.56386	NaN	NaN	63.4441	46.4548	48.46	49.9583	NaN	NaN
40	0.7	beta	5	-0.312958	3.89928	2.26575	-6.70192	NaN	NaN	52.4792	42.2964	41.4162	46.2507	NaN	NaN
50	0.7	beta	5	-0.687672	5.89529	-1.03848	-5.54958	NaN	NaN	44.3632	36.8831	33.6918	40.182	NaN	NaN
60	0.7	beta	5	1.00486	2.45549	1.69637	-3.10868	NaN	NaN	41.515	33.1711	31.4274	37.9019	NaN	NaN
70	0.7	beta	5	-2.51894	2.81024	-0.850084	-6.19851	NaN	NaN	34.9866	31.5066	29.3215	33.2596	NaN	NaN
80	0.7	beta	5	-0.0845599	2.59571	-0.14226	-3.69323	NaN	NaN	40.801	29.6877	27.8043	35.1137	NaN	NaN
90	0.7	beta	5	-0.2248	4.41186	-1.54623	-2.98384	NaN	NaN	34.0276	27.8574	23.907	32.0447	NaN	NaN
100	0.7	beta	5	2.28327	3.50015	0.428734	-0.232595	NaN	NaN	34.422	26.9329	22.9892	32.1347	NaN	NaN
5	0.8	beta	5	30.9541	99.8075	29.6075	-12.0803	NaN	NaN	146.398	162.663	217.625	85.1039	NaN	NaN
10	0.8	beta	5	10.4531	47.8795	31.364	-14.4751	NaN	NaN	96.6688	109.321	196.089	76.2226	NaN	NaN
20	0.8	beta	5	5.45546	27.6358	15.4414	-10.4335	NaN	NaN	66.9576	79.4146	130.031	57.9212	NaN	NaN
30	0.8	beta	5	0.858963	16.9653	9.79436	-10.3303	NaN	NaN	55.1831	64.9891	122.606	50.3199	NaN	NaN
40	0.8	beta	5	1.23065	16.5997	0.979614	-8.04189	NaN	NaN	56.2794	57.3776	58.6485	44.2429	NaN	NaN
50	0.8	beta	5	0.89457	9.86236	1.97222	-5.9381	NaN	NaN	45.8608	48.1696	45.0927	41.5596	NaN	NaN
60	0.8	beta	5	2.57586	9.6941	1.58472	-3.97924	NaN	NaN	50.4715	45.5017	41.5762	41.5943	NaN	NaN
70	0.8	beta	5	0.459648	8.02914	0.61224	-4.98666	NaN	NaN	39.3412	41.8244	36.5578	36.1983	NaN	NaN
80	0.8	beta	5	-0.497541	5.94013	0.676864	-4.73575	NaN	NaN	34.049	38.871	32.1956	32.3012	NaN	NaN
90	0.8	beta	5	0.662588	5.28284	0.662	-3.47053	NaN	NaN	37.6497	35.7987	30.4112	32.3269	NaN	NaN
100	0.8	beta	5	-0.795356	5.46992	-0.582748	-4.17871	NaN	NaN	30.6756	34.7484	27.3012	29.5353	NaN	NaN
5	0.9	beta	5	76.6032	203.022	17.6005	14.897	NaN	NaN	153.758	279.99	186.149	89.802	NaN	NaN
10	0.9	beta	5	36.5872	141.3	27.0685	-9.405	NaN	NaN	119.174	223.401	265.867	69.1616	NaN	NaN
20	0.9	beta	5	14.9882	86.142	31.3821	-15.5833	NaN	NaN	74.3823	167.904	247.929	55.4198	NaN	NaN
30	0.9	beta	5	10.1298	71.46	16.7901	-13.0814	NaN	NaN	54.3979	142.692	204.964	46.2159	NaN	NaN
40	0.9	beta	5	8.0688	56.7254	8.47417	-10.9707	NaN	NaN	58.8259	121.739	145.602	47.9268	NaN	NaN
50	0.9	beta	5	6.9198	47.8565	0.468942	-8.15029	NaN	NaN	46.7843	109.608	67.0413	43.3229	NaN	NaN
60	0.9	beta	5	7.60295	40.2026	-0.808708	-5.21166	NaN	NaN	49.2435	93.6767	57.207	40.494	NaN	NaN
70	0.9	beta	5	3.41048	35.9007	-2.86523	-7.02299	NaN	NaN	34.5759	82.2176	52.1231	33.6245	NaN	NaN
80	0.9	beta	5	4.02838	36.1363	-2.55099	-5.82009	NaN	NaN	34.9453	82.9128	53.0936	33.009	NaN	NaN
90	0.9	beta	5	4.40769	32.9679	-3.31077	-5.28094	NaN	NaN	38.1423	75.5593	49.1245	32.2981	NaN	NaN
100	0.9	beta	5	4.82703	29.0216	-3.60547	-3.31155	NaN	NaN	39.4329	68.7013	42.9373	30.7819	NaN	NaN
5	0.1	ml	2	NaN	3.93332	-4.85383	-2.62517	2.40032	-3.22607	33.3629	32.9547	27.8012	53.0748	37.0804	32.6561
10	0.1	ml	2	NaN	2.66411	-3.23377	-1.92501	1.2072	-1.5646	24.057	23.7095	16.7465	33.8712	25.0533	23.8382
20	0.1	ml	2	NaN	1.3803	-1.71085	-0.735002	0.718686	-0.725859	17.5049	16.0897	11.6438	24.8999	17.9101	17.39
30	0.1	ml	2	NaN	0.48459	-0.89355	-0.591931	0.18327	-0.794387	14.193	12.9952	9.5859	20.1259	14.3941	14.1317
40	0.1	ml	2	NaN	0.573755	-0.746048	-0.380181	0.296176	-0.440964	12.1824	11.2236	8.68592	17.5138	12.3216	12.1384
50	0.1	ml	2	NaN	-0.060248	-0.636556	-0.917426	-0.328847	-0.914637	10.5933	9.81717	7.57406	15.0348	10.6607	10.5715
60	0.1	ml	2	NaN	-0.135464	-0.217555	-0.24946	-0.102807	-0.599917	10.0729	8.9892	7.09091	14.5341	10.1394	10.0509
70	0.1	ml	2	NaN	0.225144	-0.0825354	0.256992	0.30151	-0.126955	8.97366	8.14782	6.27817	12.8433	9.03708	8.95398
80	0.1	ml	2	NaN	0.561081	-0.25838	0.253963	0.489913	0.116621	8.65161	8.08069	6.05297	12.1848	8.71021	8.63413
90	0.1	ml	2	NaN	0.453567	-0.31149	0.0803046	0.341524	0.011145	8.09571	7.38074	5.39206	11.3218	8.14197	8.08184
100	0.1	ml	2	NaN	-0.0253586	0.0872834	0.259059	0.14172	-0.159613	7.91838	7.13443	5.53156	11.3169	7.95521	7.90657
5	0.2	ml	2	NaN	4.85287	-3.52109	-0.853659	4.126	-2.13745	35.8254	35.6186	36.6161	59.3776	41.2293	34.6238
10	0.2	ml	2	NaN	2.92388	-1.41641	0.692579	2.59575	-0.438832	23.9354	24.0477	19.7633	35.6277	25.2181	23.5886
20	0.2	ml	2	NaN	0.768044	-0.764742	-0.150084	0.66259	-0.833551	17.1373	16.2926	13.0919	25.1415	17.5388	17.0169
30	0.2	ml	2	NaN	0.24372	-0.595917	-0.523613	0.106323	-0.883761	14.0441	13.2114	10.6889	20.4329	14.24	13.9839
40	0.2	ml	2	NaN	0.492461	-0.210905	0.287877	0.541733	-0.210104	12.0966	11.5929	9.12173	17.3119	12.2384	12.0559
50	0.2	ml	2	NaN	0.127817	0.0452902	0.365075	0.333299	-0.271603	10.8986	10.1956	8.10788	15.712	11.0005	10.8671
60	0.2	ml	2	NaN	0.653554	-0.311357	0.296153	0.588219	0.0897251	10.2422	9.59323	7.25043	14.4797	10.3314	10.2158
70	0.2	ml	2	NaN	0.192068	-0.517263	-0.585574	-0.0560738	-0.477447	9.02888	8.66365	7.06159	13.0125	9.07592	9.01393
80	0.2	ml	2	NaN	0.489729	-0.0428739	0.506128	0.564658	0.187725	8.65746	8.17889	6.5796	12.4801	8.71966	8.63888
90	0.2	ml	2	NaN	-0.00450018	-0.370453	-0.52536	-0.162595	-0.491458	8.15114	7.66131	6.22854	11.7705	8.18155	8.14081
100	0.2	ml	2	NaN	0.301924	-0.0154789	0.348948	0.372884	0.0720739	7.70857	7.29886	5.71616	10.998	7.7499	7.696
5	0.3	ml	2	NaN	3.3942	-0.705628	-2.16944	3.3349	-3.47387	35.0369	36.2496	54.8055	57.4443	40.7664	34.3403
10	0.3	ml	2	NaN	1.46144	-1.58046	-2.05007	0.725053	-2.26569	24.252	23.5276	31.0456	37.9041	25.4643	23.9529
20	0.3	ml	2	NaN	0.489243	-0.711587	-0.476364	0.411391	-1.09309	17.5844	16.9418	14.3628	26.0259	17.9714	17.4745
30	0.3	ml	2	NaN	0.135335	-0.242616	-0.0485903	0.287131	-0.72527	14.0076	13.1691	11.9006	21.4118	14.2295	13.9376
40	0.3	ml	2	NaN	0.454197	-0.308064	0.111901	0.459968	-0.292061	12.318	11.6739	9.66063	18.0485	12.4662	12.2721
50	0.3	ml	2	NaN	0.239938	-0.331307	-0.166757	0.192063	-0.406167	10.7606	10.1773	8.7499	15.9516	10.8568	10.7311
60	0.3	ml	2	NaN	0.000944443	-0.325815	-0.44346	-0.0839652	-0.580172	9.81862	9.38389	8.00027	14.4504	9.88028	9.79883
70	0.3	ml	2	NaN	0.144758	-0.411428	-0.419916	0.00212079	-0.422836	9.31482	8.72419	7.702	13.9863	9.37157	9.29576
80	0.3	ml	2	NaN	0.48323	-0.231398	0.159864	0.421188	0.0470426	9.02715	8.72356	6.79505	12.7891	9.08324	9.01056
90	0.3	ml	2	NaN	0.592404	-0.174825	0.328636	0.55312	0.219382	7.98925	7.82495	6.69834	11.8146	8.04211	7.97375
100	0.3	ml	2	NaN	0.354649	0.0383558	0.487143	0.472377	0.170052	7.76736	7.359	6.27207	11.4734	7.81351	7.75343
5	0.4	ml	2	NaN	4.02071	-0.853326	-0.214796	4.18312	-2.42193	33.735	35.7045	41.1579	56.2736	37.6555	33.1821
10	0.4	ml	2	NaN	1.24191	0.169673	-1.15138	1.1881	-2.01933	24.5802	25.6109	32.438	38.2304	25.69	24.4108
20	0.4	ml	2	NaN	0.464569	0.550663	0.72404	1.02079	-0.573446	17.393	17.8165	18.4233	26.8537	17.815	17.2887
30	0.4	ml	2	NaN	0.393275	0.1678	0.665085	0.769743	-0.265428	14.119	13.8295	12.9414	21.766	14.3684	14.0377
40	0.4	ml	2	NaN	1.01198	-0.388901	0.32021	0.910323	0.154874	12.4484	12.4668	10.7257	18.4944	12.6128	12.4002
50	0.4	ml	2	NaN	-0.533454	0.386028	0.0620879	-0.122238	-0.736057	11.1292	11.0518	10.06	16.8366	11.2138	11.1011
60	0.4	ml	2	NaN	0.190315	-0.177324	-0.0987698	0.188173	-0.312983	10.1166	9.96315	8.69143	14.9813	10.1901	10.0937
70	0.4	ml	2	NaN	0.28652	-0.108569	0.0964063	0.320814	-0.110744	9.49323	9.42845	8.47842	14.3074	9.55935	9.47218
80	0.4	ml	2	NaN	0.0535884	0.272444	0.431476	0.311682	-0.0698394	8.55448	8.79696	7.99085	12.8421	8.60537	8.53904
90	0.4	ml	2	NaN	-0.343381	-0.226468	-0.702119	-0.412798	-0.7435	8.17098	8.00842	7.17853	12.2656	8.19382	8.16213
100	0.4	ml	2	NaN	0.417113	-0.21128	0.0675158	0.347495	0.0475318	7.92222	7.87267	6.9774	11.8553	7.96364	7.90976
5	0.5	ml	2	NaN	5.73957	0.825475	-1.22907	6.02986	-1.62722	34.521	37.6434	61.1167	57.6421	46.5843	33.1445
10	0.5	ml	2	NaN	1.01737	0.0243394	-3.09118	0.434001	-2.7535	24.2156	27.0438	33.9621	37.9547	25.2214	24.0144
20	0.5	ml	2	NaN	-0.168698	-0.360924	-1.65034	-0.247369	-1.79974	17.1041	18.2434	19.2447	27.4568	17.4588	16.9781
30	0.5	ml	2	NaN	0.465892	-0.128463	-0.598219	0.350907	-0.667755	13.7426	15.619	14.8647	20.6303	13.903	13.7042
40	0.5	ml	2	NaN	0.247375	-0.0396489	-0.0931178	0.366987	-0.402791	12.5517	13.0376	12.9074	19.8839	12.7017	12.5016
50	0.5	ml	2	NaN	0.102618	-0.47594	-0.945946	-0.156918	-0.752881	11.0625	11.8066	10.7075	16.4786	11.1316	11.0424
60	0.5	ml	2	NaN	-0.0107032	-0.00916949	-0.252028	0.0489899	-0.456658	9.95478	10.6809	10.1479	15.2539	10.0167	9.93598
70	0.5	ml	2	NaN	-0.414152	0.208616	-0.204137	-0.201767	-0.635361	9.36534	9.79312	8.86825	13.9736	9.40523	9.35349
80	0.5	ml	2	NaN	0.440799	-0.203202	-0.103255	0.331697	-0.0440406	8.37944	9.29823	8.59534	12.7643	8.42538	8.367
90	0.5	ml	2	NaN	0.129139	0.104497	0.0539398	0.204352	-0.132276	8.34582	9.33919	8.32168	12.1837	8.37954	8.33771
100	0.5	ml	2	NaN	0.243338	0.00309679	0.10506	0.290268	-0.012808	7.99416	8.59661	8.17576	12.3432	8.03215	7.98299
5	0.6	ml	2	NaN	8.06511	5.53738	0.991136	11.4454	0.438668	34.9189	37.7762	88.9293	60.2388	67.4071	30.0168
10	0.6	ml	2	NaN	1.8838	2.9868	-0.00364285	2.77553	-0.978052	25.3116	28.8678	43.1908	42.2978	27.0922	24.806
20	0.6	ml	2	NaN	0.120982	0.540766	-0.697388	0.394957	-1.20271	17.8157	20.3079	20.7735	27.4841	18.1337	17.7473
30	0.6	ml	2	NaN	0.120089	0.504619	-0.496365	0.280668	-0.764223	14.3075	17.224	16.8835	21.5083	14.4453	14.285
40	0.6	ml	2	NaN	0.623875	0.33137	0.31569	0.808759	0.0269293	12.2466	14.3175	14.3226	19.277	12.3847	12.2114
50	0.6	ml	2	NaN	-0.312218	0.385448	-0.506475	-0.133549	-0.751162	11.1501	13.3777	13.1334	17.0693	11.2053	11.139
60	0.6	ml	2	NaN	0.424641	-0.56704	-1.05791	0.0178648	-0.48028	10.0721	11.8991	11.6095	15.7656	10.1234	10.0591
70	0.6	ml	2	NaN	0.451102	-0.415052	-0.652915	0.150181	-0.27696	9.4055	10.8972	10.0982	14.2043	9.45052	9.39368
80	0.6	ml	2	NaN	0.570611	-0.0193193	0.191822	0.556378	0.176186	9.11621	10.4246	9.53818	13.7001	9.16957	9.10181
90	0.6	ml	2	NaN	0.323277	-0.0810012	-0.183461	0.251968	-0.0843991	8.23209	9.75111	9.48742	12.8518	8.26758	8.22303
100	0.6	ml	2	NaN	-0.0595004	0.231642	-0.0014824	0.0862876	-0.218416	8.05492	9.3775	8.74623	12.2174	8.08123	8.04791
5	0.7	ml	2	NaN	15.5581	-1.92584	1.87655	13.2391	6.0085	29.1246	38.6143	51.8185	56.6291	35.216	28.1331
10	0.7	ml	2	NaN	7.09431	4.02636	0.260098	7.20521	2.52028	28.7454	33.1349	79.9674	41.9939	38.1991	25.9981
20	0.7	ml	2	NaN	1.32979	1.12546	-2.01748	0.811473	-0.824861	18.9357	24.4789	30.9687	27.556	19.1339	19.0108
30	0.7	ml	2	NaN	0.830216	0.38381	-1.34386	0.462886	-0.584646	15.2366	20.1245	20.1055	21.9548	15.3379	15.2388
40	0.7	ml	2	NaN	0.405995	0.741936	-0.50609	0.468934	-0.323788	13.094	17.5867	17.6611	19.6028	13.1657	13.0939
50	0.7	ml	2	NaN	0.898736	-0.435964	-1.18945	0.336895	-0.26639	11.8462	15.4388	14.3175	17.0709	11.8965	11.8443
60	0.7	ml	2	NaN	-0.528581	1.01941	-0.120975	-0.0863602	-0.610717	10.998	14.2907	13.5561	15.9828	11.0257	10.9987
70	0.7	ml	2	NaN	0.199028	-0.0321797	-1.03879	-0.0684719	-0.502116	9.80204	13.4152	12.8627	14.534	9.81569	9.8073
80	0.7	ml	2	NaN	-0.476669	0.154931	-1.19691	-0.578047	-0.956343	9.34537	12.5748	11.4893	13.2287	9.33983	9.3527
90	0.7	ml	2	NaN	0.616745	-0.236652	-0.51843	0.318452	-0.0163779	9.00119	11.7396	10.578	13.0454	9.02723	8.99761
100	0.7	ml	2	NaN	0.625916	0.565454	0.909386	0.898952	0.588251	8.50287	11.0115	9.86451	12.2769	8.54285	8.49549
5	0.8	ml	2	NaN	31.5919	-3.9961	7.32184	26.6682	18.3636	34.9351	51.0539	62.0881	57.4222	49.4259	32.5489
10	0.8	ml	2	NaN	12.7303	3.0901	-1.54223	9.36291	5.66862	27.7425	39.9881	60.0047	38.6525	28.7358	28.0288
20	0.8	ml	2	NaN	4.92627	2.27985	-1.84584	3.4685	1.71889	20.8796	30.6882	40.317	28.3923	21.0756	21.0241
30	0.8	ml	2	NaN	1.63446	2.14659	-2.31852	0.843873	-0.248961	17.9941	26.1573	34.4104	23.1443	17.9929	18.1307
40	0.8	ml	2	NaN	2.15683	0.384601	-1.75065	1.12899	0.344159	15.3609	22.5217	22.7496	19.5642	15.3845	15.4145
50	0.8	ml	2	NaN	0.162591	1.81047	-0.165314	0.510693	-0.143734	13.4504	19.7315	19.3414	17.9092	13.4637	13.4798
60	0.8	ml	2	NaN	0.630515	0.960266	-0.727908	0.465216	-0.0607281	12.7459	18.8143	17.5559	16.0557	12.7477	12.7737
70	0.8	ml	2	NaN	0.0690518	0.938154	-0.756534	0.0731176	-0.375229	11.4847	17.2313	15.5803	14.7587	11.4757	11.5057
80	0.8	ml	2	NaN	0.232129	0.912111	-0.393737	0.258249	-0.131908	10.946	16.4189	14.2031	13.211	10.9395	10.9648
90	0.8	ml	2	NaN	0.0927111	0.773334	-0.228903	0.197624	-0.147981	9.94489	14.5873	12.8214	12.7732	9.94648	9.95533
100	0.8	ml	2	NaN	-0.189009	0.654476	-0.607971	-0.149251	-0.456928	9.66337	14.3162	11.9125	11.7218	9.6526	9.67553
5	0.9	ml	2	NaN	56.4692	-7.51835	22.4846	47.7313	39.4637	48.908	70.9792	53.2883	64.4523	57.8847	47.1753
10	0.9	ml	2	NaN	30.5855	2.5876	5.44016	24.823	19.9525	36.0125	56.0025	79.366	40.0652	39.8231	35.07
20	0.9	ml	2	NaN	11.5712	6.7698	-2.72707	8.05089	6.02276	27.6775	44.3121	68.6844	27.6628	27.7139	28.1389
30	0.9	ml	2	NaN	9.0773	4.04469	-2.58904	5.83927	4.62656	23.5686	37.721	58.1349	23.6704	23.5244	23.94
40	0.9	ml	2	NaN	5.35426	1.80083	-3.619	2.67309	1.86543	20.9292	32.5914	40.4697	20.7342	20.8799	21.1
50	0.9	ml	2	NaN	4.55295	0.506506	-2.75496	2.33804	1.71539	19.1163	29.8172	27.8157	18.5258	19.087	19.2002
60	0.9	ml	2	NaN	3.39745	1.19901	-0.936522	2.28216	1.74499	16.6456	26.603	23.1135	16.9013	16.6336	16.6981
70	0.9	ml	2	NaN	2.86868	0.587653	-1.79045	1.48895	1.0445	15.5184	24.8987	21.4282	14.4902	15.488	15.5748
80	0.9	ml	2	NaN	2.24956	0.589497	-2.21784	0.900092	0.515002	15.2236	24.3359	20.6209	13.6734	15.1862	15.2757
90	0.9	ml	2	NaN	1.14422	1.51364	-1.12497	0.694271	0.338872	13.9396	22.8799	19.3754	13.3039	13.9056	13.9798
100	0.9	ml	2	NaN	1.50313	0.340486	-1.31098	0.702704	0.396081	12.7632	20.3039	16.0795	12.4852	12.7452	12.7883
5	0.1	ml	3	NaN	12.166	-3.70278	10.1479	18.6151	-5.85543	74.7677	59.0852	54.7385	112.716	126.311	59.5349
10	0.1	ml	3	NaN	6.43909	-3.22318	2.79505	5.65934	-3.95066	44.3475	40.0909	27.8795	58.7229	49.9872	41.4053
20	0.1	ml	3	NaN	3.0935	-1.9149	1.77844	2.98724	-1.91576	33.1043	26.7796	19.1087	42.1817	35.1056	31.7254
30	0.1	ml	3	NaN	1.44433	-0.789207	1.2531	1.83281	-1.47998	27.1076	20.9736	15.8042	34.3746	28.1832	26.2897
40	0.1	ml	3	NaN	1.30085	-0.667425	0.937821	1.47877	-1.01837	23.1177	18.2094	14.3288	29.3003	23.8156	22.5486
50	0.1	ml	3	NaN	0.4067	-0.641059	-0.133899	0.337432	-1.62679	19.7156	15.6433	12.1874	24.7269	20.124	19.3811
60	0.1	ml	3	NaN	0.0746121	-0.0793385	0.5733	0.658469	-1.01791	18.8712	14.5141	11.3933	23.6659	19.2144	18.5916
70	0.1	ml	3	NaN	0.590767	-0.0999482	0.814476	0.938513	-0.498725	16.6044	13.1478	10.1123	20.7694	16.8816	16.3766
80	0.1	ml	3	NaN	0.931881	-0.201896	0.896777	1.0849	-0.176049	15.6475	12.7409	9.5626	19.4573	15.8849	15.4511
90	0.1	ml	3	NaN	1.10471	-0.719858	0.293443	0.693334	-0.408892	14.8471	11.8833	8.3598	18.1789	15.0281	14.6989
100	0.1	ml	3	NaN	0.261156	0.255085	1.00268	0.900161	-0.128488	14.3875	11.2826	8.75276	17.9299	14.5632	14.2362
5	0.2	ml	3	NaN	13.0255	0.0482005	13.4959	31.304	-4.81326	112.649	63.2761	84.9508	141.826	273.688	64.492
10	0.2	ml	3	NaN	7.47574	-1.03625	6.44791	9.53947	-1.6681	51.4142	40.6536	33.5617	65.7661	63.2817	43.2756
20	0.2	ml	3	NaN	2.95966	-0.330809	3.28178	4.12433	-1.04273	32.3661	26.0278	21.1345	42.3521	34.6141	30.7194
30	0.2	ml	3	NaN	1.36891	-0.495271	1.26366	1.90118	-1.45602	26.9748	21.3264	17.1865	34.6025	28.0746	26.1293
40	0.2	ml	3	NaN	1.31824	-0.109654	1.54016	1.87639	-0.64505	22.0242	18.2748	14.4041	27.9142	22.6961	21.5215
50	0.2	ml	3	NaN	0.665504	0.2542	1.44981	1.51777	-0.518569	19.9689	16.4129	12.9248	25.167	20.4542	19.5864
60	0.2	ml	3	NaN	1.60094	-0.428392	1.2671	1.63099	-0.040925	18.4254	15.0962	11.3099	23.0292	18.8103	18.1195
70	0.2	ml	3	NaN	0.918724	-0.656485	0.161417	0.654199	-0.769189	17.178	13.7936	11.1592	21.6479	17.4549	16.9375
80	0.2	ml	3	NaN	1.21251	0.202296	1.78391	1.80787	0.517089	16.3306	13.2832	10.5278	20.4942	16.6154	16.0894
90	0.2	ml	3	NaN	0.407727	-0.345338	0.0851012	0.378406	-0.740785	15.0648	12.076	9.88324	19.0009	15.2467	14.9014
100	0.2	ml	3	NaN	0.727574	0.190544	1.24032	1.23262	0.200668	14.3423	11.7132	9.21424	17.9818	14.5335	14.176
5	0.3	ml	3	NaN	11.2482	7.69591	8.79232	84.602	-7.37977	204.418	62.9571	162.796	115.329	1880.23	60.2961
10	0.3	ml	3	NaN	4.33424	1.34071	2.86821	8.43689	-4.754	56.9053	39.2559	95.328	71.5676	91.809	45.6879
20	0.3	ml	3	NaN	1.76329	0.385902	2.83459	3.64612	-1.68532	33.9555	27.5039	24.2116	44.4673	36.2653	32.2562
30	0.3	ml	3	NaN	0.965146	0.333944	2.03087	2.44925	-1.0602	26.7618	20.8007	19.5224	35.2758	27.9943	25.7496
40	0.3	ml	3	NaN	1.46312	-0.153442	1.48036	1.97045	-0.581234	22.9508	19.0263	15.7338	29.3286	23.6833	22.3603
50	0.3	ml	3	NaN	1.00261	0.405056	2.01441	2.09672	0.0133114	20.4644	16.2672	14.5682	26.535	21.0275	20.0005
60	0.3	ml	3	NaN	0.49386	0.00354345	0.698744	0.953564	-0.741343	18.5475	15.2843	12.8679	23.6386	18.9139	18.2383
70	0.3	ml	3	NaN	0.297448	-0.0989125	0.266001	0.580849	-0.873269	17.0343	13.8629	12.543	22.0351	17.3203	16.7775
80	0.3	ml	3	NaN	0.773703	-0.0818115	0.741253	0.992765	-0.28204	16.1349	13.5834	11.1795	20.4318	16.3808	15.9233
90	0.3	ml	3	NaN	1.13495	0.00472158	1.16561	1.37017	0.228059	14.6981	12.5003	10.5421	18.8052	14.9241	14.5041
100	0.3	ml	3	NaN	0.758562	0.0175039	0.949615	1.07844	0.0471765	14.5078	11.8265	10.0591	18.4788	14.6985	14.3384
5	0.4	ml	3	NaN	12.623	4.64182	14.5249	25.808	-4.61699	77.4925	63.3494	80.8356	120.917	126.764	61.3347
10	0.4	ml	3	NaN	5.79856	2.80391	4.6362	9.74758	-3.2297	50.2543	41.2862	60.266	68.0876	62.4755	43.4118
20	0.4	ml	3	NaN	2.25199	0.417704	1.54051	3.343	-2.14444	32.9535	27.8002	31.896	43.6374	35.4685	30.9866
30	0.4	ml	3	NaN	1.66132	1.01919	3.21955	3.69589	0.00119414	28.1009	22.2255	22.0217	36.6452	29.6337	26.555
40	0.4	ml	3	NaN	2.45868	0.0270086	2.53575	3.11281	0.495366	23.6971	19.7361	17.2332	30.8693	24.5481	23.0011
50	0.4	ml	3	NaN	-0.299605	0.699213	0.791326	0.925557	-1.1643	21.0112	17.5665	15.9682	27.1985	21.5212	20.5615
60	0.4	ml	3	NaN	0.488048	0.0565975	0.582286	0.930903	-0.778594	18.6806	15.6104	14.0604	24.0804	19.0614	18.3415
70	0.4	ml	3	NaN	0.899191	0.08766	1.02472	1.35392	-0.13331	18.0998	15.1145	13.7473	23.4356	18.4479	17.771
80	0.4	ml	3	NaN	0.711643	0.566742	1.46362	1.52843	0.211673	16.1043	14.1888	12.7777	20.7533	16.3913	15.8254
90	0.4	ml	3	NaN	-0.218017	-0.0298443	-0.264625	0.0138053	-1.12351	15.2384	12.6955	11.7424	19.7592	15.4184	15.0601
100	0.4	ml	3	NaN	0.982879	0.0648485	1.11408	1.31366	0.270601	15.044	12.5684	11.2801	19.44	15.2539	14.8529
5	0.5	ml	3	NaN	14.5295	14.1355	9.3495	345.861	-6.26275	778.65	63.6886	198.771	119.494	9814.95	57.8321
10	0.5	ml	3	NaN	5.50432	4.02121	2.57173	9.11138	-4.33778	53.3861	43.8119	64.6724	68.9798	67.9119	43.2293
20	0.5	ml	3	NaN	1.20242	2.01543	2.35178	4.17336	-1.88132	36.8635	28.8458	33.2143	47.7542	40.631	32.6549
30	0.5	ml	3	NaN	1.84566	1.07111	1.17988	2.51224	-1.08697	25.0197	25.2821	24.6377	32.9689	26.1789	24.0625
40	0.5	ml	3	NaN	1.22358	0.591403	1.53253	2.33035	-0.402329	24.9319	20.7893	21.308	33.1991	25.8746	23.9961
50	0.5	ml	3	NaN	0.637092	-0.229489	-0.465934	0.474732	-1.56736	20.0056	18.449	17.2979	26.2608	20.4696	19.5918
60	0.5	ml	3	NaN	0.847803	0.230806	0.547211	1.18978	-0.564365	18.649	17.155	16.8047	24.6652	19.0727	18.2289
70	0.5	ml	3	NaN	0.0590432	0.49897	0.520056	0.739567	-0.744519	16.9576	15.4467	14.0578	22.0287	17.2428	16.7134
80	0.5	ml	3	NaN	0.81962	0.1945	0.651333	1.07444	-0.227694	15.6412	14.699	13.7935	20.7519	15.9027	15.4059
90	0.5	ml	3	NaN	0.684659	0.43608	0.743626	1.04213	-0.120622	14.9189	14.9549	13.1037	19.1767	15.1267	14.7414
100	0.5	ml	3	NaN	0.677627	0.403123	0.967556	1.18807	0.128173	14.6421	13.4438	12.8659	19.4244	14.8516	14.4424
5	0.6	ml	3	NaN	19.0232	37.7097	17.598	1311.28	-2.69198	1813.43	63.4387	336.25	134.787	24256.7	51.2103
10	0.6	ml	3	NaN	5.76906	12.0453	7.06797	22.7157	-1.88594	112.312	45.3441	101.228	83.8884	216.79	48.1391
20	0.6	ml	3	NaN	2.53334	2.23499	1.71473	4.25038	-1.67206	33.78	31.9852	35.7887	45.4981	36.5712	31.4115
30	0.6	ml	3	NaN	1.75378	1.64191	1.06453	2.69405	-1.05577	26.8715	26.917	28.0519	35.728	28.1838	25.7099
40	0.6	ml	3	NaN	1.69158	1.26636	1.63601	2.68501	-0.0893838	22.8868	22.2789	23.3619	31.2118	23.7798	22.0751
50	0.6	ml	3	NaN	0.217386	1.3855	0.495381	1.21723	-0.962755	20.5393	21.0071	21.0459	27.4621	21.0774	20.0528
60	0.6	ml	3	NaN	1.09187	-0.0859206	-0.361078	0.791666	-0.958432	18.6623	18.5344	18.6895	25.4431	19.0672	18.2814
70	0.6	ml	3	NaN	1.27124	-0.058118	0.0374027	0.974842	-0.517032	17.5378	17.5695	16.5628	23.2761	17.8625	17.225
80	0.6	ml	3	NaN	1.42309	0.425735	1.08357	1.66275	0.330477	16.5523	16.8974	15.6608	21.8187	16.8509	16.2741
90	0.6	ml	3	NaN	0.810322	0.0757111	-0.00437938	0.716808	-0.45716	15.2428	15.2964	15.4167	20.6998	15.47	15.0083
100	0.6	ml	3	NaN	0.657682	0.512017	0.712871	1.07154	0.00425337	14.8094	14.7312	14.0403	19.7621	15.0161	14.6049
5	0.7	ml	3	NaN	33.646	5.07864	16.7212	47.0105	5.27921	92.4188	69.8855	105.217	128.909	215.256	52.1808
10	0.7	ml	3	NaN	16.8369	26.7504	7.86411	1480.69	3.16818	8235.68	54.3313	395.767	76.2352	45261.8	45.9859
20	0.7	ml	3	NaN	5.28795	5.41538	0.283803	6.25538	-1.17406	42.5662	38.426	70.9566	46.5742	53.2499	32.5431
30	0.7	ml	3	NaN	2.50389	2.67962	-0.131923	2.6955	-1.25519	27.1706	31.1274	34.2647	35.8566	28.6221	25.6554
40	0.7	ml	3	NaN	1.82333	2.92938	1.20653	2.95415	-0.0291127	24.1939	27.7004	30.1637	32.7278	25.1643	23.2242
50	0.7	ml	3	NaN	2.93267	0.0192485	-0.454591	1.67475	-0.471246	20.6041	24.262	23.4544	27.4862	21.1583	20.0862
60	0.7	ml	3	NaN	0.437001	2.2234	0.974518	1.68091	-0.207002	19.5597	22.2408	22.2441	26.1198	20.0172	19.1164
70	0.7	ml	3	NaN	1.36734	0.481688	-0.661202	0.768112	-0.764723	16.757	20.8026	20.4104	22.8777	17.0501	16.4945
80	0.7	ml	3	NaN	0.139273	0.780062	-0.810298	0.13359	-1.20818	15.9018	19.2984	18.3888	21.3986	16.12	15.6771
90	0.7	ml	3	NaN	1.6792	0.287937	0.334467	1.33326	0.140414	15.8336	18.4795	17.0813	21.1637	16.075	15.6049
100	0.7	ml	3	NaN	1.57149	1.17649	1.82702	2.22516	1.12183	14.7179	17.5289	15.9982	19.69	14.9595	14.5063
5	0.8	ml	3	NaN	61.7288	5.1064	21.626	258.035	19.6166	615.5	92.9214	165.554	128.87	5335.98	49.7179
10	0.8	ml	3	NaN	28.3732	15.9043	3.89856	29.7722	6.37672	77.7892	65.9095	143.615	74.1307	141.312	45.9749
20	0.8	ml	3	NaN	13.1382	10.0129	1.19015	12.5975	2.95077	50.3159	48.0059	95.006	47.5352	65.5851	32.7497
30	0.8	ml	3	NaN	5.77859	8.57096	-0.978802	4.81533	-0.0647823	29.9956	40.5348	92.1856	37.6722	32.8735	27.5584
40	0.8	ml	3	NaN	6.90801	2.15898	-1.05029	3.90144	0.759666	24.9751	35.4943	42.2991	32.1818	26.0755	23.6176
50	0.8	ml	3	NaN	2.40694	4.33525	1.1417	3.27658	0.729638	22.3686	30.8488	33.7205	29.0805	23.0879	21.5451
60	0.8	ml	3	NaN	2.61777	3.13481	0.506097	2.59778	0.579485	20.2707	29.0857	30.3193	26.3548	20.7554	19.7916
70	0.8	ml	3	NaN	1.4778	2.12153	-0.740089	1.13379	-0.514747	17.7894	26.414	25.6463	23.7894	18.1044	17.4618
80	0.8	ml	3	NaN	1.14585	2.54258	0.0606619	1.34894	-0.0889916	16.3135	25.3365	23.4807	21.0481	16.5476	16.1181
90	0.8	ml	3	NaN	0.703455	2.27715	0.423066	1.27444	0.00959063	15.5327	22.8291	20.8053	20.2217	15.7425	15.3457
100	0.8	ml	3	NaN	0.258536	2.3603	0.295532	0.984537	-0.15548	14.6907	22.4918	19.8371	18.9154	14.8543	14.5394
5	0.9	ml	3	NaN	106.782	2.54946	54.0825	147.869	52.7195	222.573	136.316	127.457	152.667	1016.13	70.71
10	0.9	ml	3	NaN	61.1689	27.9497	14.1651	212.885	25.8815	945.176	100.897	273.188	80.3949	3248.05	51.4255
20	0.9	ml	3	NaN	27.6689	28.5376	-1.07495	47.0115	8.28775	422.749	73.2628	233.548	45.5422	823.661	37.0459
30	0.9	ml	3	NaN	21.3262	13.8526	-2.20891	13.8121	5.96027	51.1168	61.0709	155.761	38.9096	66.6438	31.5034
40	0.9	ml	3	NaN	12.7607	8.4518	-3.14075	6.32719	2.34981	30.9399	51.412	95.7291	34.0093	32.8402	28.1819
50	0.9	ml	3	NaN	10.8776	4.48425	-3.34954	4.2667	1.63993	25.5813	48.3982	58.3758	29.509	26.1484	25.0507
60	0.9	ml	3	NaN	8.58717	3.94675	-0.591706	4.80424	2.6199	22.5046	42.3796	40.0235	27.0402	22.9945	22.0543
70	0.9	ml	3	NaN	7.92935	2.97174	-1.4864	3.56583	1.77072	19.7685	39.4309	38.3946	23.1106	20.045	19.6956
80	0.9	ml	3	NaN	6.02277	3.31081	-2.72259	1.95219	0.387737	19.1985	38.5168	37.5223	21.6706	19.3518	19.2384
90	0.9	ml	3	NaN	4.76453	3.65645	-0.94758	2.6358	1.19239	17.856	35.6178	33.3956	21.5471	18.0775	17.6442
100	0.9	ml	3	NaN	3.92535	2.01829	-1.72827	1.40312	0.203246	16.8304	32.3978	28.3945	19.6872	16.9622	16.7265
5	0.1	ml	4	NaN	20.3704	-2.27175	25.3591	79.6853	-9.284	201.143	82.3452	86.6214	190.684	833.395	85.677
10	0.1	ml	4	NaN	11.281	-2.41352	9.84505	15.3776	-5.48118	68.1563	54.2313	36.7997	80.843	85.1382	55.501
20	0.1	ml	4	NaN	4.98594	-1.29194	6.00872	8.12712	-2.30087	50.3353	34.4903	24.6547	57.019	55.6283	44.5418
30	0.1	ml	4	NaN	2.62279	-0.948432	2.72406	4.07333	-2.67621	39.5587	27.0773	19.7405	44.5222	42.024	36.5914
40	0.1	ml	4	NaN	1.77532	-0.361177	2.29242	3.29311	-1.89639	33.4213	23.3169	17.752	37.3321	34.9934	31.326
50	0.1	ml	4	NaN	0.930687	-0.732419	0.549601	1.34884	-2.70119	28.086	19.7441	15.015	31.3256	29.0264	26.7893
60	0.1	ml	4	NaN	0.939984	-0.0867985	1.69021	2.22562	-1.29987	26.7432	18.6078	14.2848	29.9107	27.5351	25.6432
70	0.1	ml	4	NaN	0.970418	0.299541	2.06366	2.41645	-0.662271	23.7834	16.8536	12.7532	26.5319	24.4207	22.8577
80	0.1	ml	4	NaN	1.25416	0.0441621	1.82312	2.22185	-0.502551	22.5478	16.1939	12.2995	25.1072	23.0807	21.7257
90	0.1	ml	4	NaN	1.59168	-0.524862	1.38239	1.77228	-0.623652	21.3869	15.0982	10.6473	23.6895	21.8089	20.7381
100	0.1	ml	4	NaN	0.811729	0.408481	1.95808	2.16297	-0.0996	20.3343	14.3207	11.0604	22.6506	20.7315	19.6909
5	0.2	ml	4	NaN	21.0112	7.41175	33.6249	268.018	-7.66868	653.393	89.1458	160.992	268.496	3977.94	94.8276
10	0.2	ml	4	NaN	11.1047	0.124811	12.8158	24.7505	-3.85526	133.349	53.5461	46.4381	96.9166	223.633	62.4829
20	0.2	ml	4	NaN	4.19514	-0.176672	5.36578	7.82141	-2.83331	49.7541	34.081	26.9464	56.4855	55.1732	43.6812
30	0.2	ml	4	NaN	3.14132	-0.163814	4.11878	5.68019	-1.42176	41.494	27.6966	22.157	46.8173	44.2996	37.9818
40	0.2	ml	4	NaN	2.0947	0.234915	3.206	4.1409	-1.13309	32.5277	23.5729	18.2952	36.5863	34.1052	30.5292
50	0.2	ml	4	NaN	1.342	0.596124	3.0053	3.64786	-0.665126	29.5006	20.9332	16.539	33.0375	30.6573	27.9097
60	0.2	ml	4	NaN	2.2709	-0.199289	2.66714	3.29659	-0.261876	27.1758	19.2485	14.3959	30.3448	28.0561	25.9151
70	0.2	ml	4	NaN	1.57634	-0.770965	0.833569	1.57789	-1.44216	24.8255	17.4079	13.9408	27.6726	25.4556	23.8259
80	0.2	ml	4	NaN	2.12885	0.397686	3.15388	3.5744	0.761619	23.9582	17.1377	13.335	26.5648	24.5977	22.9108
90	0.2	ml	4	NaN	0.954974	-0.693748	0.0964133	0.723693	-1.6706	21.1331	15.2473	12.506	23.6637	21.5209	20.4795
100	0.2	ml	4	NaN	1.22122	0.511236	2.37383	2.63878	0.345955	20.8586	14.9548	11.7553	23.2245	21.2936	20.1163
5	0.3	ml	4	NaN	21.4241	27.5082	28.7282	11401.9	-8.81809	9343.53	89.5958	392.301	196.735	351224	86.88
10	0.3	ml	4	NaN	7.94732	7.57317	11.3366	133.811	-5.59191	729.976	52.7248	223.562	110.331	3548.96	70.0532
20	0.3	ml	4	NaN	3.34987	1.64677	6.8686	9.80979	-1.84693	53.1955	34.8452	31.8128	60.02	59.4404	45.9328
30	0.3	ml	4	NaN	1.53612	1.02593	4.10521	5.84903	-1.64366	40.5725	25.8573	24.9745	45.5997	43.5975	36.4666
40	0.3	ml	4	NaN	3.07989	-0.20631	3.09023	4.45173	-0.90001	33.7586	24.143	19.9649	37.8541	35.5002	31.3546
50	0.3	ml	4	NaN	1.24585	0.961699	3.23922	4.10189	-0.368735	30.0244	20.4782	18.9194	33.8631	31.3023	28.1444
60	0.3	ml	4	NaN	1.2319	0.397344	2.17299	2.91293	-0.741796	27.2444	19.3411	16.4501	30.513	28.1469	25.8656
70	0.3	ml	4	NaN	0.65324	0.292639	1.32564	2.05058	-1.11797	25.0567	17.3492	16.0787	28.2487	25.7555	23.9092
80	0.3	ml	4	NaN	1.36033	0.0617863	1.60669	2.20171	-0.561993	23.3586	17.5618	14.1149	26.1093	23.9144	22.4713
90	0.3	ml	4	NaN	1.61937	0.341598	2.35876	2.80367	0.283394	21.8538	15.8344	13.2208	24.5458	22.3648	21.0117
100	0.3	ml	4	NaN	1.11087	0.15064	1.62881	2.08227	-0.207861	21.233	14.9592	12.9921	23.8093	21.6582	20.474
5	0.4	ml	4	NaN	20.5738	16.7135	32.6652	107.767	-7.8617	184.379	90.7382	145.837	196.087	610.164	86.5707
10	0.4	ml	4	NaN	9.85368	6.1468	10.093	30.6002	-5.75074	123.054	54.3245	94.3979	92.9896	254.168	60.0833
20	0.4	ml	4	NaN	5.26777	2.22064	6.93135	11.8035	-1.18127	59.5159	36.1681	45.9673	61.2427	70.6972	46.3543
30	0.4	ml	4	NaN	2.24985	2.2874	5.85636	8.47461	0.0371032	48.5643	28.3741	29.5196	49.5391	53.1881	40.0119
40	0.4	ml	4	NaN	3.43865	1.08358	5.27363	6.78316	0.996562	37.4113	25.7422	22.8898	41.6994	39.5499	34.2113
50	0.4	ml	4	NaN	0.067595	1.4874	2.49879	3.54146	-1.05031	32.6984	22.6292	20.807	36.3306	34.0597	30.4992
60	0.4	ml	4	NaN	1.04122	0.105018	1.0728	2.08781	-1.55641	27.1281	20.0859	18.0655	30.4253	27.9921	25.7526
70	0.4	ml	4	NaN	1.42169	0.076582	1.57024	2.53657	-0.694701	27.0583	19.1739	17.3281	30.0426	27.8515	25.5991
80	0.4	ml	4	NaN	0.813725	0.746077	1.77946	2.49961	-0.401373	24.0503	17.6051	16.4598	26.5399	24.7065	22.6607
90	0.4	ml	4	NaN	0.270788	0.249896	0.518883	1.20427	-1.32532	22.3727	16.5959	15.2038	25.0701	22.8358	21.4977
100	0.4	ml	4	NaN	1.56543	0.258868	2.04868	2.62981	0.28951	22.1574	15.8044	14.4143	24.9809	22.628	21.3041
5	0.5	ml	4	NaN	23.6432	67.8566	32.0184	2.20137e+06	-9.66675	611711	86.3552	921.009	234.801	6.42511e+07	85.8638
10	0.5	ml	4	NaN	10.7988	10.5339	10.3152	36.6639	-5.33047	145.192	59.5737	107.401	102.12	250.909	64.2479
20	0.5	ml	4	NaN	1.82621	4.00409	4.91411	12.0449	-2.96081	81.9915	36.2996	45.3757	64.5155	100.836	49.2464
30	0.5	ml	4	NaN	3.58426	2.21312	3.38039	6.71915	-1.34639	40.5188	32.4888	32.893	43.9147	44.0313	35.0914
40	0.5	ml	4	NaN	2.60494	0.830609	3.08514	5.33367	-0.580826	38.24	26.0835	26.4273	42.5242	40.4597	34.6429
50	0.5	ml	4	NaN	1.42556	0.346904	0.732823	2.42731	-2.0313	30.1589	23.379	22.3927	33.8973	31.395	28.1583
60	0.5	ml	4	NaN	1.03829	0.848044	1.42351	2.84091	-1.05396	28.969	21.7175	21.4609	32.0022	30.0416	26.8799
70	0.5	ml	4	NaN	0.907777	0.584436	1.26531	2.19986	-1.01826	24.9012	19.7416	17.8743	28.2018	25.5981	23.7874
80	0.5	ml	4	NaN	1.58519	0.780792	2.11699	3.00707	0.090432	23.6255	18.7315	17.5398	26.8423	24.2775	22.4997
90	0.5	ml	4	NaN	1.1295	0.922832	1.75471	2.53817	-0.0876508	22.1432	18.3469	16.9422	25.0529	22.6719	21.1983
100	0.5	ml	4	NaN	0.961543	0.63638	1.40987	2.1488	-0.232536	21.5747	17.0213	16.0249	24.4361	22.0341	20.6884
5	0.6	ml	4	NaN	29.488	78.9955	32.5642	459226	-8.79136	198468	87.8979	739.918	211.682	1.32441e+07	68.4327
10	0.6	ml	4	NaN	9.88577	31.2319	18.1053	879.768	-1.495	5181.39	58.247	239.969	137.094	20004.1	78.492
20	0.6	ml	4	NaN	5.31913	4.81918	5.46034	12.4218	-1.65886	58.6162	41.8485	48.6909	60.4754	67.8184	45.6456
30	0.6	ml	4	NaN	3.68595	3.54854	3.67166	7.7638	-0.880454	43.2118	34.4603	37.5585	46.2999	47.2014	36.7422
40	0.6	ml	4	NaN	2.67463	2.63956	3.75519	6.53056	0.186543	37.2222	27.9687	30.7258	41.3493	39.6128	33.2071
50	0.6	ml	4	NaN	1.02271	1.98413	1.3893	3.45944	-1.34638	31.3143	26.3663	26.472	35.2416	32.7077	28.9849
60	0.6	ml	4	NaN	2.1896	0.365297	0.795164	2.74932	-1.14627	28.3942	23.3301	23.5484	32.314	29.4333	26.5603
70	0.6	ml	4	NaN	2.33718	0.697366	1.83872	3.3694	-0.0368064	27.3013	22.0757	21.3604	30.6464	28.1906	25.6049
80	0.6	ml	4	NaN	1.93096	0.986249	1.70724	3.06596	0.0285799	24.8925	21.5977	20.6392	27.8411	25.611	23.4408
90	0.6	ml	4	NaN	1.11957	0.587135	0.523538	1.80218	-0.874624	23.153	19.4861	19.5552	26.2595	23.7076	21.9846
100	0.6	ml	4	NaN	1.12742	1.0722	1.70471	2.64105	0.169844	22.5193	18.3633	18.0499	25.5218	23.0362	21.4396
5	0.7	ml	4	NaN	50.8838	16.3515	38.4521	237.455	2.80691	427.139	100.532	170.562	238.408	2035.9	80.3744
10	0.7	ml	4	NaN	26.8741	70.2304	17.9769	3.9835e+06	3.53953	8.28891e+06	73.749	1295.43	114.477	1.24685e+08	69.9528
20	0.7	ml	4	NaN	9.61233	10.5298	3.18486	40.0674	-1.80073	456.766	49.0293	130.133	61.131	842.567	45.9402
30	0.7	ml	4	NaN	4.74734	5.4626	1.94747	8.47869	-1.35006	48.8252	39.6047	48.0377	47.7058	54.252	38.1204
40	0.7	ml	4	NaN	3.44611	5.05592	2.72684	7.34995	0.161724	40.4777	35.5815	40.9022	42.9866	43.3874	34.721
50	0.7	ml	4	NaN	5.09	0.995225	1.16185	4.49876	-0.41882	31.2717	30.6991	30.4861	34.9546	32.8208	28.4492
60	0.7	ml	4	NaN	1.65631	3.33265	1.97567	4.45457	0.0243683	30.7535	27.9911	29.8333	33.909	32.0499	28.0969
70	0.7	ml	4	NaN	1.85122	1.08184	-0.95206	1.48447	-1.99709	25.1165	26.1828	26.3483	28.7251	25.883	23.6145
80	0.7	ml	4	NaN	0.849626	1.71172	0.0108664	1.85537	-1.27815	24.236	24.2101	24.0375	27.3831	24.9121	22.7583
90	0.7	ml	4	NaN	2.56536	0.967055	1.37909	3.02364	0.241607	23.7741	22.8636	21.8574	27.0108	24.3963	22.491
100	0.7	ml	4	NaN	2.24084	2.24052	3.28693	4.38351	1.78231	22.3201	22.2925	20.3205	25.3783	22.9006	21.2062
5	0.8	ml	4	NaN	89.8545	25.5159	44.4549	38353.1	16.3986	33184.4	132.542	369.8	240.241	1.03704e+06	71.6707
10	0.8	ml	4	NaN	41.2118	38.8738	12.2872	250.181	4.79435	1000.83	88.0833	280.127	113.499	3750.16	67.9912
20	0.8	ml	4	NaN	20.1674	21.5799	4.39589	67.7137	2.57274	582.979	62.1713	180.118	64.843	1056.18	48.3286
30	0.8	ml	4	NaN	10.6918	16.3327	1.433	26.1452	0.478061	270.165	51.4003	195.887	51.3439	439.839	40.7554
40	0.8	ml	4	NaN	9.90038	5.26762	0.0775473	8.75843	0.0643219	50.6799	44.9218	61.7302	41.3478	56.9014	33.8129
50	0.8	ml	4	NaN	5.19279	5.95226	2.02289	7.50161	1.03555	38.8985	38.7757	45.702	38.2521	41.556	31.6338
60	0.8	ml	4	NaN	3.90982	6.19402	2.63068	6.75836	1.60093	33.1654	36.5738	40.8124	34.7591	34.8044	29.1782
70	0.8	ml	4	NaN	3.12359	4.05048	0.428891	4.03899	-0.0772668	28.0018	33.0648	34.4987	30.6947	29.1022	25.2865
80	0.8	ml	4	NaN	2.36358	3.88435	0.638845	3.43042	-0.0703515	24.6888	31.6021	30.7517	27.1282	25.4857	22.8057
90	0.8	ml	4	NaN	1.75824	3.25796	0.612851	2.86368	-0.169194	23.2815	28.8473	27.2719	25.9739	23.9121	21.8463
100	0.8	ml	4	NaN	1.12745	2.84211	-0.0922411	1.92833	-0.765543	21.1254	27.8413	25.3153	23.7926	21.6128	19.9462
5	0.9	ml	4	NaN	157.018	21.0001	86.5669	2612.95	54.0826	3700.82	202.502	255.435	265.49	47107.4	85.0584
10	0.9	ml	4	NaN	90.5284	78.2236	24.4963	51136.6	25.8343	141284	142.774	762.182	124.908	1.02007e+06	71.4733
20	0.9	ml	4	NaN	43.8113	55.7706	1.79524	7864.91	7.96447	83460.4	98.3284	594.746	60.481	241882	47.3266
30	0.9	ml	4	NaN	34.0384	32.6238	-1.04794	150.316	5.54059	1863.41	82.4239	356.654	49.2119	3262.9	40.2916
40	0.9	ml	4	NaN	21.9985	19.7144	-2.08494	27.023	2.58098	225.532	68.7701	211.132	45.2092	315.521	39.3987
50	0.9	ml	4	NaN	16.4499	11.8562	-1.71772	10.4751	1.95103	48.082	63.1521	101.116	38.2052	53.2586	32.2812
60	0.9	ml	4	NaN	13.6431	6.73249	0.0399266	8.63368	2.74957	34.9624	55.1763	53.7391	34.6591	36.8936	29.4857
70	0.9	ml	4	NaN	11.9407	5.92866	-1.57587	5.9581	0.99717	29.1208	50.6446	54.7415	29.4025	30.4981	25.2093
80	0.9	ml	4	NaN	10.7206	5.55048	-2.25143	4.43778	0.238237	26.5118	49.3169	51.4332	26.8488	27.4847	23.6906
90	0.9	ml	4	NaN	8.66865	6.00426	-0.584054	5.5694	1.5057	27.308	45.3475	47.479	27.4145	28.3219	23.5739
100	0.9	ml	4	NaN	6.46991	4.39872	-0.969706	3.72941	0.399655	24.8267	41.4976	39.1797	25.3085	25.56	21.9575
5	0.1	ml	5	NaN	29.002	-0.7134	46.6455	356.937	-11.3442	701.106	105.262	111.302	302.832	6271.88	114.208
10	0.1	ml	5	NaN	16.5545	-1.24035	18.5351	31.9717	-6.37432	106.875	68.9308	45.0102	107.66	148.593	70.6391
20	0.1	ml	5	NaN	6.53987	-0.692336	9.60795	14.6107	-3.40072	72.0019	41.2084	28.8495	70.4593	82.8066	56.1971
30	0.1	ml	5	NaN	3.51065	-1.12182	3.94787	6.82942	-4.52593	53.8187	32.4443	23.1909	54.1972	58.3173	46.3796
40	0.1	ml	5	NaN	2.79291	-0.309421	3.81374	5.99497	-2.89421	43.8102	27.0407	20.5394	43.8134	46.6087	38.5418
50	0.1	ml	5	NaN	1.49951	-0.925072	1.12669	2.64211	-4.27731	36.9925	23.5279	17.4963	37.3181	38.6585	33.6795
60	0.1	ml	5	NaN	1.57633	-0.042252	2.72307	4.02042	-2.15211	34.4729	21.5361	16.5313	35.0659	35.8471	31.6466
70	0.1	ml	5	NaN	1.7406	0.797009	3.78149	4.80414	-0.723462	30.7886	19.9491	14.7726	31.2879	31.9235	28.3332
80	0.1	ml	5	NaN	1.8982	0.437405	3.37102	4.3536	-0.621623	29.7395	18.897	14.3831	30.0617	30.7009	27.4478
90	0.1	ml	5	NaN	1.81047	-0.458951	1.95171	2.71031	-1.63741	27.7411	17.6184	12.5881	28.1479	28.4567	25.9868
100	0.1	ml	5	NaN	0.939711	0.473597	2.35441	3.10238	-1.05051	26.0585	16.55	12.7754	26.416	26.708	24.3749
5	0.2	ml	5	NaN	30.8508	17.7091	70.4004	3742.7	-6.08309	4450.83	119.083	271.059	507.792	76488.8	143.371
10	0.2	ml	5	NaN	14.3175	0.755325	18.2624	63.9649	-7.07135	466.279	66.6057	58.2705	132.3	1026.43	82.9979
20	0.2	ml	5	NaN	6.45268	0.364293	9.44526	15.2012	-3.36528	70.8034	40.4427	32.1448	70.0548	81.4592	55.4159
30	0.2	ml	5	NaN	3.48631	0.996153	6.98557	10.7567	-1.87071	57.9222	31.6183	26.5735	57.2701	63.3271	48.4336
40	0.2	ml	5	NaN	3.15022	0.837265	5.55522	7.85177	-1.37056	43.8346	28.3719	21.5146	44.2705	46.7253	38.6217
50	0.2	ml	5	NaN	1.57605	1.04009	4.28347	6.13231	-1.4552	39.301	24.1904	19.3933	39.375	41.3636	35.0741
60	0.2	ml	5	NaN	2.41161	0.0730277	3.48964	4.92363	-1.35667	35.6538	22.6609	17.0457	35.9605	37.1476	32.4376
70	0.2	ml	5	NaN	1.5285	-0.927598	0.679926	1.98036	-3.32868	32.27	20.2476	16.2594	32.2694	33.3209	29.675
80	0.2	ml	5	NaN	2.52003	0.604279	3.99666	5.18598	0.06736	31.67	20.085	15.6583	31.4371	32.7513	28.8108
90	0.2	ml	5	NaN	1.01514	-0.679318	0.349825	1.35117	-2.99026	27.3909	17.476	14.4898	27.7602	28.0565	25.6564
100	0.2	ml	5	NaN	1.70673	0.472123	2.90093	3.77866	-0.440511	27.0902	17.6631	13.6405	27.2683	27.8017	25.1454
5	0.3	ml	5	NaN	28.0751	52.5632	36.6274	1.84717e+06	-16.2749	435273	110.682	786.571	226.115	5.8207e+07	94.0295
10	0.3	ml	5	NaN	12.5505	16.7317	21.573	5648.75	-5.42762	20872.4	64.3781	438.66	147.14	177088	90.9271
20	0.3	ml	5	NaN	4.67267	3.57468	11.1619	19.1663	-2.10331	78.1195	41.2822	39.0474	73.4555	91.3124	57.9536
30	0.3	ml	5	NaN	2.4645	2.35516	7.86158	12.9356	-1.01611	63.2968	30.8169	30.4343	58.2319	70.0949	49.4873
40	0.3	ml	5	NaN	3.99732	-0.142701	4.43645	7.32536	-2.01177	46.4973	27.9153	23.4847	45.6969	49.6943	40.0529
50	0.3	ml	5	NaN	2.17564	1.74362	5.41639	7.78907	-0.22836	40.3211	24.2804	22.2501	40.0929	42.6234	35.4064
60	0.3	ml	5	NaN	2.3113	0.821132	4.02687	5.83829	-0.74203	36.5757	22.8412	19.2651	36.4505	38.2225	32.8191
70	0.3	ml	5	NaN	1.29287	0.300005	2.17099	3.90162	-1.84091	34.4066	20.242	18.8594	34.0722	35.6908	31.0735
80	0.3	ml	5	NaN	1.7795	0.359467	2.56942	3.85609	-1.18965	30.4043	20.4757	16.5117	30.5664	31.3766	27.9674
90	0.3	ml	5	NaN	1.95984	0.774571	3.50166	4.65418	-0.0414248	29.2617	18.7232	15.6075	29.3947	30.153	26.8923
100	0.3	ml	5	NaN	1.40949	0.740267	3.08286	4.20026	-0.173766	28.806	17.2972	15.4478	28.8241	29.5916	26.5167
5	0.4	ml	5	NaN	29.429	31.6009	55.7958	551.797	-10.148	601.416	116.441	227.468	294.68	4708.28	109.532
10	0.4	ml	5	NaN	11.58	16.3209	21.8484	184.871	-5.64584	899.498	66.0504	150.315	143.757	2569.84	86.9671
20	0.4	ml	5	NaN	6.49043	3.15541	9.60536	23.3515	-2.82582	134.972	42.3227	60.4313	75.6856	199.33	59.6206
30	0.4	ml	5	NaN	3.4154	2.2317	6.49224	12.8175	-1.85342	71.2267	33.2536	33.9914	56.151	80.8647	48.1969
40	0.4	ml	5	NaN	4.98024	1.6974	7.81008	11.766	1.22756	53.9838	30.8102	27.4923	51.2703	58.0983	44.8289
50	0.4	ml	5	NaN	0.643321	1.69318	3.57589	6.51328	-1.72723	45.2567	26.2856	24.4562	43.5502	47.7895	39.1394
60	0.4	ml	5	NaN	1.67053	0.567644	2.46616	4.6038	-2.01107	36.9485	23.4315	21.1932	36.285	38.5996	32.8465
70	0.4	ml	5	NaN	1.94469	0.846505	3.40046	5.45766	-0.585197	36.8398	22.4475	20.6464	35.8276	38.314	32.7264
80	0.4	ml	5	NaN	1.32563	1.33686	3.08773	4.86654	-0.568029	33.2125	20.9951	19.2997	31.2297	34.4688	28.8234
90	0.4	ml	5	NaN	0.752134	0.240789	0.889298	2.32126	-2.32427	29.2418	19.5344	17.5412	29.0103	30.0481	26.8553
100	0.4	ml	5	NaN	2.26337	0.316161	2.84578	4.17589	-0.216765	29.2437	18.5863	16.8485	29.3004	30.0414	26.9006
5	0.5	ml	5	NaN	35.0422	225.512	66.9779	10692562519	-11.3104	3.88321e+08	111.939	3069.52	436.29	276530000000	116.847
10	0.5	ml	5	NaN	15.9252	14.093	14.3559	88.8292	-8.98672	296.015	70.8517	152.487	112.692	938.854	71.8049
20	0.5	ml	5	NaN	3.90651	5.87202	8.66649	30.6173	-3.10875	224.294	42.4926	57.3439	81.8023	309.259	66.192
30	0.5	ml	5	NaN	6.06234	3.34635	6.488	13.9104	-1.1891	63.5803	38.9422	40.0423	54.1876	71.7974	45.9523
40	0.5	ml	5	NaN	3.43948	1.99481	5.45481	10.29	-0.586491	53.9724	30.7953	31.1711	50.5123	58.1731	44.2664
50	0.5	ml	5	NaN	2.08836	1.09446	2.16066	5.48742	-2.64138	41.7701	27.3502	26.5329	40.2573	44.1486	36.0381
60	0.5	ml	5	NaN	1.43151	1.15389	1.91032	5.02035	-2.14417	40.695	25.3868	25.4582	37.7119	42.7368	34.4877
70	0.5	ml	5	NaN	1.801	0.373745	1.44019	3.44852	-2.29788	32.5872	23.1652	20.7293	32.6274	33.7869	29.6018
80	0.5	ml	5	NaN	2.24325	0.763444	2.56156	4.50804	-0.83212	31.7468	21.6485	20.3618	31.6558	32.8529	28.746
90	0.5	ml	5	NaN	1.94734	1.1832	2.61404	4.41147	-0.513069	29.2795	21.3624	19.9061	29.1554	30.2121	26.5971
100	0.5	ml	5	NaN	1.24473	0.694782	1.64638	3.23523	-1.22784	28.7066	19.624	18.4491	28.5022	29.4827	26.2689
5	0.6	ml	5	NaN	41.1827	97.2339	47.5335	429389	-13.5312	145240	113.445	769.871	253.656	9.1551e+06	85.0715
10	0.6	ml	5	NaN	15.7095	49.9044	29.6853	31958.3	-1.20374	135291	73.2633	411.455	198.797	845583	111.954
20	0.6	ml	5	NaN	7.42369	7.78662	9.26578	25.148	-2.1532	94.5003	50.3431	60.1616	72.8251	116.083	57.5885
30	0.6	ml	5	NaN	4.67625	5.71753	5.80437	15.4592	-1.48343	70.3956	40.1485	46.8051	55.8659	80.3513	47.4957
40	0.6	ml	5	NaN	4.16878	3.00935	4.80629	10.9889	-0.64771	54.6897	33.0664	36.1935	49.6155	59.2827	43.4452
50	0.6	ml	5	NaN	2.1194	2.2402	2.07622	6.42014	-2.30531	43.5921	30.4906	30.9414	41.7734	46.1958	37.1596
60	0.6	ml	5	NaN	3.43655	0.867904	2.07615	5.66681	-1.57461	39.0512	27.352	27.858	37.7516	40.9894	33.8449
70	0.6	ml	5	NaN	3.13247	1.13568	2.91231	5.79276	-0.527042	37.5726	25.852	24.5672	36.102	39.1599	32.8965
80	0.6	ml	5	NaN	2.23452	1.95417	3.05988	5.80847	-0.0644611	34.7311	24.7521	24.4185	32.8928	36.0881	30.269
90	0.6	ml	5	NaN	1.21742	1.16294	1.18891	3.56699	-1.55757	32.0558	22.2312	22.6764	30.9564	33.0783	28.5696
100	0.6	ml	5	NaN	1.8697	1.65753	2.98747	5.07793	0.266528	30.9059	21.6811	21.1691	30.0879	31.8455	27.7096
5	0.7	ml	5	NaN	64.8093	23.791	58.6899	888.749	-2.58628	1734.62	125.115	202.973	383.228	11830.2	105.565
10	0.7	ml	5	NaN	34.1566	166.676	26.1858	8677368582	1.15713	7045108800	90.0612	3353.45	150.445	271644000000	90.2881
20	0.7	ml	5	NaN	12.8841	17.1038	5.63024	572.517	-3.45196	7500.88	57.4856	218.676	75.2269	17172.1	59.458
30	0.7	ml	5	NaN	7.12537	7.76799	3.91482	23.2958	-1.91331	183.868	45.6646	65.3355	58.0744	237.137	50.1194
40	0.7	ml	5	NaN	4.77488	6.91316	4.35237	14.1375	-0.0743081	64.2227	40.729	49.7728	51.5874	70.6665	45.6709
50	0.7	ml	5	NaN	6.48514	2.31493	2.57509	8.72246	-0.94282	47.4557	35.8936	37.583	41.723	50.8535	37.2538
60	0.7	ml	5	NaN	2.11412	5.12002	3.66528	9.12016	0.279318	46.0588	32.0833	36.2287	40.7575	48.7461	37.2013
70	0.7	ml	5	NaN	2.54364	2.18366	-0.071775	4.21062	-2.59314	36.3527	30.3565	31.6058	34.2586	37.9586	31.2031
80	0.7	ml	5	NaN	2.16311	2.25635	0.810512	4.46076	-1.6425	35.0391	28.7351	28.7663	32.7312	36.4129	30.1172
90	0.7	ml	5	NaN	3.8399	1.28262	2.15536	5.19158	-0.196617	33.1673	26.9714	25.7603	31.8163	34.3096	29.2129
100	0.7	ml	5	NaN	3.0978	2.67393	3.85749	6.41265	1.36746	30.2007	25.9323	23.8996	29.4818	31.1941	26.9319
5	0.8	ml	5	NaN	115.285	64.769	77.3463	6.13732e+06	12.1381	1.59895e+06	171.423	740.045	403.544	1.65851e+08	93.0931
10	0.8	ml	5	NaN	52.5952	68.79	25.3886	5561.69	4.42926	19958.8	108.089	463.13	175.551	120027	98.6289
20	0.8	ml	5	NaN	27.1219	37.4856	10.0738	814.599	3.28338	9399.45	75.4675	292.865	82.0155	21162.1	64.7779
30	0.8	ml	5	NaN	15.6392	26.9539	3.92359	437.713	0.405684	6636.64	61.0933	364.28	62.8192	12909.1	54.0044
40	0.8	ml	5	NaN	14.7677	7.40589	1.44125	20.312	-0.695389	145.322	54.0768	81.9779	48.2677	177.908	42.929
50	0.8	ml	5	NaN	8.18708	7.69734	3.05759	14.4602	0.668364	70.6363	45.3088	57.9883	44.9454	78.2852	40.6654
60	0.8	ml	5	NaN	7.57693	6.62185	3.32388	11.7212	1.39582	52.3234	43.0894	49.946	41.9342	55.8351	38.7879
70	0.8	ml	5	NaN	5.19382	5.45703	1.37721	8.25853	-0.185048	42.827	38.6929	42.024	36.2139	45.1842	33.3035
80	0.8	ml	5	NaN	3.03019	5.19388	0.717689	5.97878	-1.04974	35.8959	36.1464	36.8776	31.3978	37.5399	29.1604
90	0.8	ml	5	NaN	2.49416	4.83046	1.68501	6.09648	-0.126592	33.7958	33.2175	32.797	30.7514	35.1174	28.5303
100	0.8	ml	5	NaN	2.47763	3.42152	0.348225	4.14344	-1.24162	30.3377	32.2957	29.8841	28.2909	31.3426	26.1626
5	0.9	ml	5	NaN	211.159	38.0754	120.199	90817	51.3365	61567.8	271.286	420.769	409.775	1.93375e+06	99.6752
10	0.9	ml	5	NaN	121.873	120.256	29.1758	1.12198e+07	20.7379	1.77734e+07	185.022	1464.44	148.177	2.60831e+08	81.8049
20	0.9	ml	5	NaN	56.9858	102.153	3.28528	2.05023e+06	4.42959	1.51889e+07	121.162	1309.11	72.5667	6.36393e+07	57.6871
30	0.9	ml	5	NaN	43.9658	61.9476	0.980133	6831.57	3.82123	91066.8	100.4	691.532	59.8497	194418	51.7288
40	0.9	ml	5	NaN	29.4419	34.8214	-0.869707	311.021	1.55049	4650.88	83.7328	380.239	56.1935	7557.06	53.413
50	0.9	ml	5	NaN	22.6935	13.6332	-0.518253	21.5883	1.3038	140.312	75.4585	88.6409	45.0681	165.311	40.8538
60	0.9	ml	5	NaN	17.5769	11.0666	0.575407	15.5634	1.86211	62.7577	66.4062	70.6982	39.8607	68.2459	37.3787
70	0.9	ml	5	NaN	14.9018	8.74713	-1.34803	10.4559	-0.256087	48.2068	59.8175	63.2521	34.9699	51.5811	32.3989
80	0.9	ml	5	NaN	14.2649	9.09226	-1.43295	9.42105	-0.343151	47.326	58.6635	66.7597	31.9682	50.7645	29.7141
90	0.9	ml	5	NaN	12.7796	7.90269	-0.305739	10.0872	0.953028	46.8879	54.5051	59.1841	32.7169	49.3711	31.4091
100	0.9	ml	5	NaN	8.88049	7.01414	-0.119865	7.97464	0.252932	42.3015	49.0802	49.6144	29.423	44.4281	27.8655
5	0.1	km	2	3.61012	NaN	NaN	NaN	NaN	NaN	35.2194	NaN	NaN	NaN	NaN	NaN
10	0.1	km	2	2.11141	NaN	NaN	NaN	NaN	NaN	24.5988	NaN	NaN	NaN	NaN	NaN
20	0.1	km	2	1.47482	NaN	NaN	22.5419	NaN	NaN	17.7452	NaN	NaN	53.8787	NaN	NaN
30	0.1	km	2	0.897409	NaN	NaN	17.75	NaN	NaN	14.1926	NaN	NaN	38.7631	NaN	NaN
40	0.1	km	2	1.08516	NaN	NaN	10.2289	NaN	NaN	12.3763	NaN	NaN	31.3495	NaN	NaN
50	0.1	km	2	0.547593	NaN	NaN	9.60887	NaN	NaN	10.7521	NaN	NaN	26.5239	NaN	NaN
60	0.1	km	2	0.678124	NaN	NaN	5.82469	NaN	NaN	10.1345	NaN	NaN	22.4087	NaN	NaN
70	0.1	km	2	1.11037	NaN	NaN	7.0288	NaN	NaN	9.09932	NaN	NaN	20.838	NaN	NaN
80	0.1	km	2	1.31719	NaN	NaN	5.31601	NaN	NaN	8.82597	NaN	NaN	18.3135	NaN	NaN
90	0.1	km	2	1.07935	NaN	NaN	4.79037	NaN	NaN	8.26498	NaN	NaN	18.0701	NaN	NaN
100	0.1	km	2	1.01492	NaN	NaN	5.25114	NaN	NaN	8.09402	NaN	NaN	17.3816	NaN	NaN
5	0.2	km	2	8.73949	NaN	NaN	NaN	NaN	NaN	39.1662	NaN	NaN	NaN	NaN	NaN
10	0.2	km	2	5.81184	NaN	NaN	NaN	NaN	NaN	24.5537	NaN	NaN	NaN	NaN	NaN
20	0.2	km	2	3.5791	NaN	NaN	24.6914	NaN	NaN	17.5666	NaN	NaN	57.2861	NaN	NaN
30	0.2	km	2	2.80007	NaN	NaN	18.4355	NaN	NaN	14.1268	NaN	NaN	39.4303	NaN	NaN
40	0.2	km	2	3.12335	NaN	NaN	11.5585	NaN	NaN	12.4069	NaN	NaN	29.6333	NaN	NaN
50	0.2	km	2	2.85661	NaN	NaN	9.34106	NaN	NaN	11.2727	NaN	NaN	25.4235	NaN	NaN
60	0.2	km	2	3.03313	NaN	NaN	6.8865	NaN	NaN	10.585	NaN	NaN	22.3995	NaN	NaN
70	0.2	km	2	2.29991	NaN	NaN	4.99522	NaN	NaN	9.18461	NaN	NaN	18.8487	NaN	NaN
80	0.2	km	2	2.93369	NaN	NaN	5.09677	NaN	NaN	9.00398	NaN	NaN	18.7883	NaN	NaN
90	0.2	km	2	2.18773	NaN	NaN	3.84183	NaN	NaN	8.30073	NaN	NaN	16.7628	NaN	NaN
100	0.2	km	2	2.75148	NaN	NaN	4.85481	NaN	NaN	8.14987	NaN	NaN	16.5355	NaN	NaN
5	0.3	km	2	13.1941	NaN	NaN	NaN	NaN	NaN	41.0491	NaN	NaN	NaN	NaN	NaN
10	0.3	km	2	7.72499	NaN	NaN	NaN	NaN	NaN	25.3928	NaN	NaN	NaN	NaN	NaN
20	0.3	km	2	6.17487	NaN	NaN	25.2941	NaN	NaN	18.1947	NaN	NaN	56.2414	NaN	NaN
30	0.3	km	2	5.73438	NaN	NaN	19.0114	NaN	NaN	14.9339	NaN	NaN	41.4878	NaN	NaN
40	0.3	km	2	5.56061	NaN	NaN	10.2325	NaN	NaN	13.1782	NaN	NaN	29.1978	NaN	NaN
50	0.3	km	2	5.26973	NaN	NaN	9.15027	NaN	NaN	11.7434	NaN	NaN	25.7405	NaN	NaN
60	0.3	km	2	4.91479	NaN	NaN	5.98114	NaN	NaN	10.7402	NaN	NaN	21.4618	NaN	NaN
70	0.3	km	2	4.86357	NaN	NaN	5.5405	NaN	NaN	10.2905	NaN	NaN	19.8638	NaN	NaN
80	0.3	km	2	5.26853	NaN	NaN	4.8057	NaN	NaN	10.2933	NaN	NaN	18.9663	NaN	NaN
90	0.3	km	2	5.34791	NaN	NaN	5.01725	NaN	NaN	9.43148	NaN	NaN	17.2192	NaN	NaN
100	0.3	km	2	5.26959	NaN	NaN	4.70677	NaN	NaN	9.27742	NaN	NaN	16.3593	NaN	NaN
5	0.4	km	2	21.4734	NaN	NaN	NaN	NaN	NaN	43.9337	NaN	NaN	NaN	NaN	NaN
10	0.4	km	2	13.19	NaN	NaN	NaN	NaN	NaN	27.5482	NaN	NaN	NaN	NaN	NaN
20	0.4	km	2	11.1078	NaN	NaN	26.4354	NaN	NaN	19.9688	NaN	NaN	60.8997	NaN	NaN
30	0.4	km	2	10.1235	NaN	NaN	20.6212	NaN	NaN	16.7975	NaN	NaN	41.1851	NaN	NaN
40	0.4	km	2	9.77077	NaN	NaN	10.7358	NaN	NaN	15.2297	NaN	NaN	29.3572	NaN	NaN
50	0.4	km	2	8.92504	NaN	NaN	10.0047	NaN	NaN	13.8508	NaN	NaN	27.6729	NaN	NaN
60	0.4	km	2	8.72384	NaN	NaN	6.41932	NaN	NaN	12.904	NaN	NaN	22.8182	NaN	NaN
70	0.4	km	2	8.76609	NaN	NaN	6.42901	NaN	NaN	12.6285	NaN	NaN	20.2414	NaN	NaN
80	0.4	km	2	8.75432	NaN	NaN	5.76907	NaN	NaN	11.8796	NaN	NaN	19.5382	NaN	NaN
90	0.4	km	2	7.957	NaN	NaN	3.7998	NaN	NaN	11.0994	NaN	NaN	17.4787	NaN	NaN
100	0.4	km	2	8.51879	NaN	NaN	4.22335	NaN	NaN	11.3693	NaN	NaN	16.8606	NaN	NaN
5	0.5	km	2	32.8488	NaN	NaN	NaN	NaN	NaN	56.7351	NaN	NaN	NaN	NaN	NaN
10	0.5	km	2	20.2665	NaN	NaN	NaN	NaN	NaN	31.3344	NaN	NaN	NaN	NaN	NaN
20	0.5	km	2	15.6823	NaN	NaN	23.4289	NaN	NaN	22.5306	NaN	NaN	55.0656	NaN	NaN
30	0.5	km	2	15.1689	NaN	NaN	18.3953	NaN	NaN	19.4957	NaN	NaN	38.3001	NaN	NaN
40	0.5	km	2	14.4856	NaN	NaN	10.3101	NaN	NaN	18.6247	NaN	NaN	30.9407	NaN	NaN
50	0.5	km	2	13.7317	NaN	NaN	7.73183	NaN	NaN	16.9294	NaN	NaN	24.1031	NaN	NaN
60	0.5	km	2	13.6768	NaN	NaN	6.30564	NaN	NaN	16.4182	NaN	NaN	21.7529	NaN	NaN
70	0.5	km	2	13.4303	NaN	NaN	6.85528	NaN	NaN	15.9299	NaN	NaN	20.4255	NaN	NaN
80	0.5	km	2	13.4911	NaN	NaN	4.93507	NaN	NaN	15.4845	NaN	NaN	17.9841	NaN	NaN
90	0.5	km	2	13.2809	NaN	NaN	4.71084	NaN	NaN	15.2194	NaN	NaN	16.8115	NaN	NaN
100	0.5	km	2	13.2998	NaN	NaN	3.93962	NaN	NaN	15.2115	NaN	NaN	16.8254	NaN	NaN
5	0.6	km	2	50.31	NaN	NaN	NaN	NaN	NaN	81.5004	NaN	NaN	NaN	NaN	NaN
10	0.6	km	2	33.2991	NaN	NaN	NaN	NaN	NaN	44.9318	NaN	NaN	NaN	NaN	NaN
20	0.6	km	2	25.0227	NaN	NaN	23.2475	NaN	NaN	29.8817	NaN	NaN	57.5584	NaN	NaN
30	0.6	km	2	23.1095	NaN	NaN	18.5529	NaN	NaN	26.3098	NaN	NaN	39.2069	NaN	NaN
40	0.6	km	2	22.1289	NaN	NaN	11.2641	NaN	NaN	24.6343	NaN	NaN	31.233	NaN	NaN
50	0.6	km	2	21.0257	NaN	NaN	8.84681	NaN	NaN	23.2264	NaN	NaN	24.4769	NaN	NaN
60	0.6	km	2	20.545	NaN	NaN	6.13962	NaN	NaN	22.4543	NaN	NaN	22.845	NaN	NaN
70	0.6	km	2	20.2457	NaN	NaN	5.56883	NaN	NaN	21.8099	NaN	NaN	20.018	NaN	NaN
80	0.6	km	2	20.5555	NaN	NaN	5.44263	NaN	NaN	21.9885	NaN	NaN	19.1142	NaN	NaN
90	0.6	km	2	20.038	NaN	NaN	4.32624	NaN	NaN	21.3297	NaN	NaN	17.467	NaN	NaN
100	0.6	km	2	19.8701	NaN	NaN	3.82118	NaN	NaN	21.0386	NaN	NaN	16.5613	NaN	NaN
5	0.7	km	2	65.2308	NaN	NaN	NaN	NaN	NaN	84.7208	NaN	NaN	NaN	NaN	NaN
10	0.7	km	2	50.3299	NaN	NaN	NaN	NaN	NaN	65.5756	NaN	NaN	NaN	NaN	NaN
20	0.7	km	2	37.888	NaN	NaN	22.5932	NaN	NaN	41.7876	NaN	NaN	54.828	NaN	NaN
30	0.7	km	2	34.1471	NaN	NaN	19.141	NaN	NaN	36.4382	NaN	NaN	41.1689	NaN	NaN
40	0.7	km	2	33.0311	NaN	NaN	10.8282	NaN	NaN	34.8857	NaN	NaN	30.5077	NaN	NaN
50	0.7	km	2	31.466	NaN	NaN	7.86467	NaN	NaN	32.9248	NaN	NaN	24.3102	NaN	NaN
60	0.7	km	2	31.217	NaN	NaN	6.88474	NaN	NaN	32.4918	NaN	NaN	22.7726	NaN	NaN
70	0.7	km	2	30.2628	NaN	NaN	5.56034	NaN	NaN	31.3336	NaN	NaN	20.1625	NaN	NaN
80	0.7	km	2	29.8173	NaN	NaN	4.13081	NaN	NaN	30.6956	NaN	NaN	17.9012	NaN	NaN
90	0.7	km	2	29.691	NaN	NaN	4.67309	NaN	NaN	30.5996	NaN	NaN	17.3941	NaN	NaN
100	0.7	km	2	30.2856	NaN	NaN	5.11104	NaN	NaN	31.0749	NaN	NaN	16.7507	NaN	NaN
5	0.8	km	2	94.2853	NaN	NaN	NaN	NaN	NaN	118.637	NaN	NaN	NaN	NaN	NaN
10	0.8	km	2	77.9542	NaN	NaN	NaN	NaN	NaN	92.9557	NaN	NaN	NaN	NaN	NaN
20	0.8	km	2	59.6229	NaN	NaN	24.2779	NaN	NaN	65.1834	NaN	NaN	54.2069	NaN	NaN
30	0.8	km	2	53.0789	NaN	NaN	18.0536	NaN	NaN	56.5629	NaN	NaN	38.6108	NaN	NaN
40	0.8	km	2	49.9501	NaN	NaN	9.8644	NaN	NaN	51.6773	NaN	NaN	30.4214	NaN	NaN
50	0.8	km	2	49.0998	NaN	NaN	9.8258	NaN	NaN	50.3444	NaN	NaN	26.4567	NaN	NaN
60	0.8	km	2	47.1964	NaN	NaN	6.76316	NaN	NaN	48.2499	NaN	NaN	22.5549	NaN	NaN
70	0.8	km	2	45.7669	NaN	NaN	6.26369	NaN	NaN	46.6559	NaN	NaN	20.3597	NaN	NaN
80	0.8	km	2	45.0492	NaN	NaN	5.42229	NaN	NaN	45.7511	NaN	NaN	18.3544	NaN	NaN
90	0.8	km	2	44.8742	NaN	NaN	4.86148	NaN	NaN	45.5415	NaN	NaN	16.7147	NaN	NaN
100	0.8	km	2	44.0652	NaN	NaN	3.72174	NaN	NaN	44.6245	NaN	NaN	15.9472	NaN	NaN
5	0.9	km	2	138.473	NaN	NaN	NaN	NaN	NaN	163.223	NaN	NaN	NaN	NaN	NaN
10	0.9	km	2	121.53	NaN	NaN	NaN	NaN	NaN	143.589	NaN	NaN	NaN	NaN	NaN
20	0.9	km	2	102.676	NaN	NaN	27.1349	NaN	NaN	115.359	NaN	NaN	58.837	NaN	NaN
30	0.9	km	2	87.8901	NaN	NaN	20.1328	NaN	NaN	95.6407	NaN	NaN	40.4144	NaN	NaN
40	0.9	km	2	82.2824	NaN	NaN	9.14126	NaN	NaN	86.7538	NaN	NaN	28.3286	NaN	NaN
50	0.9	km	2	76.4308	NaN	NaN	8.87097	NaN	NaN	78.8207	NaN	NaN	25.487	NaN	NaN
60	0.9	km	2	75.2163	NaN	NaN	6.90267	NaN	NaN	76.8681	NaN	NaN	22.1362	NaN	NaN
70	0.9	km	2	72.2965	NaN	NaN	5.93301	NaN	NaN	73.6299	NaN	NaN	19.4037	NaN	NaN
80	0.9	km	2	70.7207	NaN	NaN	4.18081	NaN	NaN	71.9699	NaN	NaN	18.0132	NaN	NaN
90	0.9	km	2	69.9968	NaN	NaN	4.95804	NaN	NaN	70.9656	NaN	NaN	17.2339	NaN	NaN
100	0.9	km	2	68.8233	NaN	NaN	3.58115	NaN	NaN	69.5867	NaN	NaN	16.22	NaN	NaN
5	0.1	km	3	5.58459	NaN	NaN	NaN	NaN	NaN	71.9872	NaN	NaN	NaN	NaN	NaN
10	0.1	km	3	1.74289	NaN	NaN	NaN	NaN	NaN	47.4167	NaN	NaN	NaN	NaN	NaN
20	0.1	km	3	1.00826	NaN	NaN	49.2545	NaN	NaN	34.5542	NaN	NaN	118.824	NaN	NaN
30	0.1	km	3	0.166922	NaN	NaN	38.1005	NaN	NaN	27.3122	NaN	NaN	80.714	NaN	NaN
40	0.1	km	3	0.44794	NaN	NaN	19.9813	NaN	NaN	24.8406	NaN	NaN	59.2319	NaN	NaN
50	0.1	km	3	-0.00451803	NaN	NaN	18.6571	NaN	NaN	21.2401	NaN	NaN	47.9713	NaN	NaN
60	0.1	km	3	0.0260828	NaN	NaN	12.1197	NaN	NaN	19.7844	NaN	NaN	40.1999	NaN	NaN
70	0.1	km	3	0.766219	NaN	NaN	13.2454	NaN	NaN	17.8463	NaN	NaN	36.6706	NaN	NaN
80	0.1	km	3	1.09872	NaN	NaN	9.90135	NaN	NaN	16.9577	NaN	NaN	31.0413	NaN	NaN
90	0.1	km	3	0.541695	NaN	NaN	8.65916	NaN	NaN	16.2149	NaN	NaN	30.6904	NaN	NaN
100	0.1	km	3	0.994171	NaN	NaN	9.38503	NaN	NaN	15.787	NaN	NaN	28.743	NaN	NaN
5	0.2	km	3	9.73644	NaN	NaN	NaN	NaN	NaN	86.9292	NaN	NaN	NaN	NaN	NaN
10	0.2	km	3	5.22514	NaN	NaN	NaN	NaN	NaN	46.6482	NaN	NaN	NaN	NaN	NaN
20	0.2	km	3	3.49136	NaN	NaN	53.9351	NaN	NaN	34.3591	NaN	NaN	128.173	NaN	NaN
30	0.2	km	3	1.95381	NaN	NaN	39.6967	NaN	NaN	28.0375	NaN	NaN	84.5644	NaN	NaN
40	0.2	km	3	2.26543	NaN	NaN	21.9494	NaN	NaN	23.7372	NaN	NaN	54.2492	NaN	NaN
50	0.2	km	3	2.14511	NaN	NaN	18.1897	NaN	NaN	21.9797	NaN	NaN	46.0595	NaN	NaN
60	0.2	km	3	2.49868	NaN	NaN	12.752	NaN	NaN	20.0006	NaN	NaN	38.2804	NaN	NaN
70	0.2	km	3	1.13404	NaN	NaN	9.79321	NaN	NaN	17.5736	NaN	NaN	33.2455	NaN	NaN
80	0.2	km	3	2.49583	NaN	NaN	9.90051	NaN	NaN	16.9522	NaN	NaN	32.314	NaN	NaN
90	0.2	km	3	1.32541	NaN	NaN	7.91951	NaN	NaN	15.8948	NaN	NaN	28.6527	NaN	NaN
100	0.2	km	3	2.30919	NaN	NaN	9.34959	NaN	NaN	15.9381	NaN	NaN	28.6607	NaN	NaN
5	0.3	km	3	13.5431	NaN	NaN	NaN	NaN	NaN	78.3064	NaN	NaN	NaN	NaN	NaN
10	0.3	km	3	5.4139	NaN	NaN	NaN	NaN	NaN	49.5869	NaN	NaN	NaN	NaN	NaN
20	0.3	km	3	5.86468	NaN	NaN	57.0834	NaN	NaN	36.397	NaN	NaN	139.696	NaN	NaN
30	0.3	km	3	4.70327	NaN	NaN	41.49	NaN	NaN	28.1817	NaN	NaN	88.8394	NaN	NaN
40	0.3	km	3	4.49872	NaN	NaN	20.4035	NaN	NaN	24.3493	NaN	NaN	52.7878	NaN	NaN
50	0.3	km	3	4.9656	NaN	NaN	19.7017	NaN	NaN	22.2525	NaN	NaN	48.9435	NaN	NaN
60	0.3	km	3	3.6803	NaN	NaN	11.8196	NaN	NaN	20.2571	NaN	NaN	37.6553	NaN	NaN
70	0.3	km	3	3.29066	NaN	NaN	10.7733	NaN	NaN	18.2093	NaN	NaN	33.6501	NaN	NaN
80	0.3	km	3	4.17259	NaN	NaN	8.6803	NaN	NaN	18.1888	NaN	NaN	32.3004	NaN	NaN
90	0.3	km	3	4.39016	NaN	NaN	9.58906	NaN	NaN	16.1351	NaN	NaN	29.6958	NaN	NaN
100	0.3	km	3	4.18865	NaN	NaN	7.80127	NaN	NaN	16.9448	NaN	NaN	26.798	NaN	NaN
5	0.4	km	3	24.0495	NaN	NaN	NaN	NaN	NaN	78.7839	NaN	NaN	NaN	NaN	NaN
10	0.4	km	3	11.8643	NaN	NaN	NaN	NaN	NaN	48.4323	NaN	NaN	NaN	NaN	NaN
20	0.4	km	3	8.53184	NaN	NaN	50.5849	NaN	NaN	33.3863	NaN	NaN	120.378	NaN	NaN
30	0.4	km	3	9.22182	NaN	NaN	42.5033	NaN	NaN	28.4484	NaN	NaN	84.15	NaN	NaN
40	0.4	km	3	8.43659	NaN	NaN	21.4048	NaN	NaN	24.5999	NaN	NaN	54.7291	NaN	NaN
50	0.4	km	3	7.64798	NaN	NaN	19.0676	NaN	NaN	23.7771	NaN	NaN	50.6703	NaN	NaN
60	0.4	km	3	6.71121	NaN	NaN	12.4462	NaN	NaN	19.9792	NaN	NaN	40.446	NaN	NaN
70	0.4	km	3	7.71987	NaN	NaN	12.2615	NaN	NaN	20.9174	NaN	NaN	35.6811	NaN	NaN
80	0.4	km	3	7.46765	NaN	NaN	10.9469	NaN	NaN	18.0489	NaN	NaN	33.685	NaN	NaN
90	0.4	km	3	6.15989	NaN	NaN	7.70811	NaN	NaN	16.9884	NaN	NaN	29.8211	NaN	NaN
100	0.4	km	3	7.52363	NaN	NaN	8.51129	NaN	NaN	17.2084	NaN	NaN	29.5469	NaN	NaN
5	0.5	km	3	38.9987	NaN	NaN	NaN	NaN	NaN	103.205	NaN	NaN	NaN	NaN	NaN
10	0.5	km	3	19.9581	NaN	NaN	NaN	NaN	NaN	50.8454	NaN	NaN	NaN	NaN	NaN
20	0.5	km	3	15.2486	NaN	NaN	51.0786	NaN	NaN	36.9951	NaN	NaN	119.267	NaN	NaN
30	0.5	km	3	13.7833	NaN	NaN	38.4734	NaN	NaN	28.0351	NaN	NaN	77.6757	NaN	NaN
40	0.5	km	3	13.246	NaN	NaN	20.2186	NaN	NaN	28.0272	NaN	NaN	57.6444	NaN	NaN
50	0.5	km	3	11.8784	NaN	NaN	15.0721	NaN	NaN	23.4032	NaN	NaN	41.6546	NaN	NaN
60	0.5	km	3	12.223	NaN	NaN	12.0497	NaN	NaN	22.3247	NaN	NaN	37.1821	NaN	NaN
70	0.5	km	3	12.3827	NaN	NaN	12.8327	NaN	NaN	21.5408	NaN	NaN	35.0116	NaN	NaN
80	0.5	km	3	12.2745	NaN	NaN	9.5003	NaN	NaN	20.1597	NaN	NaN	30.9561	NaN	NaN
90	0.5	km	3	11.9421	NaN	NaN	9.01794	NaN	NaN	19.2591	NaN	NaN	28.2408	NaN	NaN
100	0.5	km	3	12.1727	NaN	NaN	7.74425	NaN	NaN	19.3954	NaN	NaN	27.956	NaN	NaN
5	0.6	km	3	71.1432	NaN	NaN	NaN	NaN	NaN	171.515	NaN	NaN	NaN	NaN	NaN
10	0.6	km	3	38.2796	NaN	NaN	NaN	NaN	NaN	71.204	NaN	NaN	NaN	NaN	NaN
20	0.6	km	3	25.7899	NaN	NaN	50.7401	NaN	NaN	42.7648	NaN	NaN	134.063	NaN	NaN
30	0.6	km	3	22.9483	NaN	NaN	39.0841	NaN	NaN	34.6234	NaN	NaN	80.9997	NaN	NaN
40	0.6	km	3	21.8383	NaN	NaN	22.0177	NaN	NaN	31.1431	NaN	NaN	57.5884	NaN	NaN
50	0.6	km	3	20.7895	NaN	NaN	17.8786	NaN	NaN	29.1326	NaN	NaN	45.545	NaN	NaN
60	0.6	km	3	20.2338	NaN	NaN	11.9555	NaN	NaN	27.7844	NaN	NaN	39.8158	NaN	NaN
70	0.6	km	3	19.8313	NaN	NaN	11.0447	NaN	NaN	26.3831	NaN	NaN	35.4293	NaN	NaN
80	0.6	km	3	20.249	NaN	NaN	10.4503	NaN	NaN	25.8294	NaN	NaN	32.847	NaN	NaN
90	0.6	km	3	19.3611	NaN	NaN	7.51445	NaN	NaN	24.9496	NaN	NaN	29.245	NaN	NaN
100	0.6	km	3	19.7366	NaN	NaN	7.29909	NaN	NaN	24.8071	NaN	NaN	27.6795	NaN	NaN
5	0.7	km	3	88.4796	NaN	NaN	NaN	NaN	NaN	140.77	NaN	NaN	NaN	NaN	NaN
10	0.7	km	3	66.3847	NaN	NaN	NaN	NaN	NaN	121.87	NaN	NaN	NaN	NaN	NaN
20	0.7	km	3	42.8649	NaN	NaN	48.582	NaN	NaN	55.772	NaN	NaN	119.488	NaN	NaN
30	0.7	km	3	37.5172	NaN	NaN	40.7411	NaN	NaN	46.154	NaN	NaN	88.7798	NaN	NaN
40	0.7	km	3	36.3826	NaN	NaN	21.5487	NaN	NaN	43.7568	NaN	NaN	55.9444	NaN	NaN
50	0.7	km	3	33.7669	NaN	NaN	15.3016	NaN	NaN	39.4908	NaN	NaN	42.8282	NaN	NaN
60	0.7	km	3	34.026	NaN	NaN	13.5521	NaN	NaN	39.0376	NaN	NaN	40.5593	NaN	NaN
70	0.7	km	3	32.1188	NaN	NaN	11.6162	NaN	NaN	36.2037	NaN	NaN	34.7302	NaN	NaN
80	0.7	km	3	31.6513	NaN	NaN	7.63767	NaN	NaN	35.4364	NaN	NaN	30.1202	NaN	NaN
90	0.7	km	3	31.7833	NaN	NaN	9.46472	NaN	NaN	35.4596	NaN	NaN	30.3079	NaN	NaN
100	0.7	km	3	32.7208	NaN	NaN	8.84604	NaN	NaN	35.8821	NaN	NaN	27.8803	NaN	NaN
5	0.8	km	3	141.132	NaN	NaN	NaN	NaN	NaN	222.709	NaN	NaN	NaN	NaN	NaN
10	0.8	km	3	109.877	NaN	NaN	NaN	NaN	NaN	153.007	NaN	NaN	NaN	NaN	NaN
20	0.8	km	3	76.7351	NaN	NaN	52.2501	NaN	NaN	94.0798	NaN	NaN	115.093	NaN	NaN
30	0.8	km	3	66.0629	NaN	NaN	38.9825	NaN	NaN	77.0121	NaN	NaN	80.3458	NaN	NaN
40	0.8	km	3	60.0944	NaN	NaN	18.948	NaN	NaN	65.8555	NaN	NaN	58.3754	NaN	NaN
50	0.8	km	3	58.9812	NaN	NaN	19.4657	NaN	NaN	63.094	NaN	NaN	48.8691	NaN	NaN
60	0.8	km	3	56.2998	NaN	NaN	13.2906	NaN	NaN	59.9443	NaN	NaN	39.1129	NaN	NaN
70	0.8	km	3	53.4081	NaN	NaN	11.3486	NaN	NaN	56.4595	NaN	NaN	36.1412	NaN	NaN
80	0.8	km	3	52.8489	NaN	NaN	10.7211	NaN	NaN	55.2674	NaN	NaN	32.3125	NaN	NaN
90	0.8	km	3	52.4671	NaN	NaN	9.2158	NaN	NaN	54.7107	NaN	NaN	28.0763	NaN	NaN
100	0.8	km	3	51.6797	NaN	NaN	8.19692	NaN	NaN	53.6701	NaN	NaN	27.9041	NaN	NaN
5	0.9	km	3	243.424	NaN	NaN	NaN	NaN	NaN	335.99	NaN	NaN	NaN	NaN	NaN
10	0.9	km	3	200.5	NaN	NaN	NaN	NaN	NaN	290.048	NaN	NaN	NaN	NaN	NaN
20	0.9	km	3	157.109	NaN	NaN	55.9202	NaN	NaN	202.756	NaN	NaN	129.712	NaN	NaN
30	0.9	km	3	124.971	NaN	NaN	39.9597	NaN	NaN	149.669	NaN	NaN	82.3061	NaN	NaN
40	0.9	km	3	113.642	NaN	NaN	19.0977	NaN	NaN	125.987	NaN	NaN	55.0805	NaN	NaN
50	0.9	km	3	103.07	NaN	NaN	17.3425	NaN	NaN	110.111	NaN	NaN	47.4616	NaN	NaN
60	0.9	km	3	100.46	NaN	NaN	12.5284	NaN	NaN	104.954	NaN	NaN	38.8705	NaN	NaN
70	0.9	km	3	96.0012	NaN	NaN	11.3573	NaN	NaN	99.6933	NaN	NaN	33.6274	NaN	NaN
80	0.9	km	3	93.1862	NaN	NaN	7.71175	NaN	NaN	96.7161	NaN	NaN	30.511	NaN	NaN
90	0.9	km	3	92.0427	NaN	NaN	9.57906	NaN	NaN	94.8225	NaN	NaN	29.9633	NaN	NaN
100	0.9	km	3	89.5832	NaN	NaN	6.0504	NaN	NaN	91.7947	NaN	NaN	26.1917	NaN	NaN
5	0.1	km	4	5.49908	NaN	NaN	NaN	NaN	NaN	108.218	NaN	NaN	NaN	NaN	NaN
10	0.1	km	4	2.1058	NaN	NaN	NaN	NaN	NaN	71.0988	NaN	NaN	NaN	NaN	NaN
20	0.1	km	4	1.23256	NaN	NaN	78.6962	NaN	NaN	52.1819	NaN	NaN	195.344	NaN	NaN
30	0.1	km	4	-1.05636	NaN	NaN	57.9446	NaN	NaN	40.6077	NaN	NaN	126.866	NaN	NaN
40	0.1	km	4	-0.336478	NaN	NaN	29.3076	NaN	NaN	39.1087	NaN	NaN	84.5179	NaN	NaN
50	0.1	km	4	-0.698843	NaN	NaN	26.7023	NaN	NaN	30.9622	NaN	NaN	63.7941	NaN	NaN
60	0.1	km	4	-0.0151498	NaN	NaN	18.0973	NaN	NaN	29.8261	NaN	NaN	55.0407	NaN	NaN
70	0.1	km	4	0.719699	NaN	NaN	19.0971	NaN	NaN	27.5384	NaN	NaN	50.7021	NaN	NaN
80	0.1	km	4	0.889713	NaN	NaN	13.518	NaN	NaN	26.6942	NaN	NaN	41.9482	NaN	NaN
90	0.1	km	4	0.421	NaN	NaN	13.0719	NaN	NaN	25.5085	NaN	NaN	41.6424	NaN	NaN
100	0.1	km	4	1.24643	NaN	NaN	13.3864	NaN	NaN	24.8889	NaN	NaN	38.0187	NaN	NaN
5	0.2	km	4	10.7118	NaN	NaN	NaN	NaN	NaN	162.269	NaN	NaN	NaN	NaN	NaN
10	0.2	km	4	3.39748	NaN	NaN	NaN	NaN	NaN	70.1314	NaN	NaN	NaN	NaN	NaN
20	0.2	km	4	1.95363	NaN	NaN	82.2353	NaN	NaN	54.0362	NaN	NaN	214.483	NaN	NaN
30	0.2	km	4	1.86133	NaN	NaN	64.0631	NaN	NaN	43.6785	NaN	NaN	138.56	NaN	NaN
40	0.2	km	4	1.85309	NaN	NaN	32.1484	NaN	NaN	37.4318	NaN	NaN	77.5624	NaN	NaN
50	0.2	km	4	2.03424	NaN	NaN	27.1009	NaN	NaN	36.356	NaN	NaN	66.0346	NaN	NaN
60	0.2	km	4	1.96879	NaN	NaN	18.4027	NaN	NaN	32.5294	NaN	NaN	52.8937	NaN	NaN
70	0.2	km	4	-0.296233	NaN	NaN	13.9985	NaN	NaN	25.3381	NaN	NaN	44.4432	NaN	NaN
80	0.2	km	4	2.52565	NaN	NaN	14.8876	NaN	NaN	26.4936	NaN	NaN	44.0097	NaN	NaN
90	0.2	km	4	0.117457	NaN	NaN	11.0903	NaN	NaN	24.1733	NaN	NaN	37.8126	NaN	NaN
100	0.2	km	4	2.35162	NaN	NaN	13.0773	NaN	NaN	26.3893	NaN	NaN	38.2739	NaN	NaN
5	0.3	km	4	16.2153	NaN	NaN	NaN	NaN	NaN	128.229	NaN	NaN	NaN	NaN	NaN
10	0.3	km	4	4.30201	NaN	NaN	NaN	NaN	NaN	80.4022	NaN	NaN	NaN	NaN	NaN
20	0.3	km	4	5.89041	NaN	NaN	91.8066	NaN	NaN	60.2404	NaN	NaN	256.545	NaN	NaN
30	0.3	km	4	2.97885	NaN	NaN	62.7936	NaN	NaN	43.4342	NaN	NaN	143.604	NaN	NaN
40	0.3	km	4	3.04499	NaN	NaN	28.8078	NaN	NaN	36.9691	NaN	NaN	72.78	NaN	NaN
50	0.3	km	4	3.77359	NaN	NaN	27.6497	NaN	NaN	33.8816	NaN	NaN	68.5827	NaN	NaN
60	0.3	km	4	2.79801	NaN	NaN	17.8103	NaN	NaN	33.8963	NaN	NaN	53.6295	NaN	NaN
70	0.3	km	4	2.13384	NaN	NaN	16.0523	NaN	NaN	28.6223	NaN	NaN	46.5404	NaN	NaN
80	0.3	km	4	3.46963	NaN	NaN	12.4733	NaN	NaN	28.1282	NaN	NaN	43.4397	NaN	NaN
90	0.3	km	4	3.63328	NaN	NaN	13.7589	NaN	NaN	25.0149	NaN	NaN	40.0771	NaN	NaN
100	0.3	km	4	3.19517	NaN	NaN	10.7473	NaN	NaN	30.3532	NaN	NaN	35.6556	NaN	NaN
5	0.4	km	4	21.8044	NaN	NaN	NaN	NaN	NaN	105.962	NaN	NaN	NaN	NaN	NaN
10	0.4	km	4	7.50617	NaN	NaN	NaN	NaN	NaN	68.8816	NaN	NaN	NaN	NaN	NaN
20	0.4	km	4	7.70121	NaN	NaN	83.16	NaN	NaN	52.051	NaN	NaN	204.483	NaN	NaN
30	0.4	km	4	7.33334	NaN	NaN	66.5492	NaN	NaN	41.964	NaN	NaN	133.868	NaN	NaN
40	0.4	km	4	6.51944	NaN	NaN	32.9026	NaN	NaN	37.5261	NaN	NaN	87.6724	NaN	NaN
50	0.4	km	4	6.43508	NaN	NaN	27.9304	NaN	NaN	38.5718	NaN	NaN	72.8532	NaN	NaN
60	0.4	km	4	3.94622	NaN	NaN	17.2943	NaN	NaN	28.4489	NaN	NaN	53.7739	NaN	NaN
70	0.4	km	4	5.98347	NaN	NaN	17.3415	NaN	NaN	32.3653	NaN	NaN	48.7355	NaN	NaN
80	0.4	km	4	4.84232	NaN	NaN	14.7478	NaN	NaN	25.8921	NaN	NaN	45.5292	NaN	NaN
90	0.4	km	4	4.06279	NaN	NaN	11.3062	NaN	NaN	25.4439	NaN	NaN	39.4773	NaN	NaN
100	0.4	km	4	6.11988	NaN	NaN	12.2892	NaN	NaN	25.0164	NaN	NaN	40.2657	NaN	NaN
5	0.5	km	4	44.2304	NaN	NaN	NaN	NaN	NaN	195.314	NaN	NaN	NaN	NaN	NaN
10	0.5	km	4	16.6752	NaN	NaN	NaN	NaN	NaN	72.214	NaN	NaN	NaN	NaN	NaN
20	0.5	km	4	11.4202	NaN	NaN	79.6048	NaN	NaN	53.2898	NaN	NaN	195.653	NaN	NaN
30	0.5	km	4	10.2993	NaN	NaN	59.7223	NaN	NaN	39.5418	NaN	NaN	125.246	NaN	NaN
40	0.5	km	4	10.0891	NaN	NaN	28.6227	NaN	NaN	38.9783	NaN	NaN	75.526	NaN	NaN
50	0.5	km	4	8.83468	NaN	NaN	22.9334	NaN	NaN	33.0474	NaN	NaN	58.0768	NaN	NaN
60	0.5	km	4	9.15847	NaN	NaN	17.0437	NaN	NaN	30.9831	NaN	NaN	51.4468	NaN	NaN
70	0.5	km	4	9.72427	NaN	NaN	17.2815	NaN	NaN	29.2451	NaN	NaN	46.4173	NaN	NaN
80	0.5	km	4	9.9878	NaN	NaN	14.2708	NaN	NaN	27.0946	NaN	NaN	41.9125	NaN	NaN
90	0.5	km	4	9.37142	NaN	NaN	12.814	NaN	NaN	26.3643	NaN	NaN	37.9931	NaN	NaN
100	0.5	km	4	9.16072	NaN	NaN	10.3834	NaN	NaN	25.6643	NaN	NaN	36.2093	NaN	NaN
5	0.6	km	4	74.9687	NaN	NaN	NaN	NaN	NaN	244.076	NaN	NaN	NaN	NaN	NaN
10	0.6	km	4	37.2399	NaN	NaN	NaN	NaN	NaN	99.0143	NaN	NaN	NaN	NaN	NaN
20	0.6	km	4	22.5673	NaN	NaN	80.2318	NaN	NaN	60.7832	NaN	NaN	239.316	NaN	NaN
30	0.6	km	4	19.1947	NaN	NaN	61.767	NaN	NaN	43.3363	NaN	NaN	126.21	NaN	NaN
40	0.6	km	4	18.3403	NaN	NaN	32.3172	NaN	NaN	40.7454	NaN	NaN	82.6746	NaN	NaN
50	0.6	km	4	17.1855	NaN	NaN	25.5338	NaN	NaN	38.7623	NaN	NaN	64.4101	NaN	NaN
60	0.6	km	4	17.0355	NaN	NaN	17.3493	NaN	NaN	34.3292	NaN	NaN	53.1961	NaN	NaN
70	0.6	km	4	16.9295	NaN	NaN	17.7064	NaN	NaN	32.9682	NaN	NaN	50.2351	NaN	NaN
80	0.6	km	4	16.3471	NaN	NaN	13.9231	NaN	NaN	29.6747	NaN	NaN	43.8928	NaN	NaN
90	0.6	km	4	15.8691	NaN	NaN	11.1276	NaN	NaN	30.8248	NaN	NaN	39.1009	NaN	NaN
100	0.6	km	4	16.7273	NaN	NaN	10.9438	NaN	NaN	29.5981	NaN	NaN	37.3002	NaN	NaN
5	0.7	km	4	97.0247	NaN	NaN	NaN	NaN	NaN	187.266	NaN	NaN	NaN	NaN	NaN
10	0.7	km	4	70.9473	NaN	NaN	NaN	NaN	NaN	186.151	NaN	NaN	NaN	NaN	NaN
20	0.7	km	4	38.6535	NaN	NaN	75.4019	NaN	NaN	64.4785	NaN	NaN	188.671	NaN	NaN
30	0.7	km	4	34.077	NaN	NaN	64.5718	NaN	NaN	56.1034	NaN	NaN	150.31	NaN	NaN
40	0.7	km	4	32.0593	NaN	NaN	31.411	NaN	NaN	49.5657	NaN	NaN	80.7503	NaN	NaN
50	0.7	km	4	29.7986	NaN	NaN	23.6698	NaN	NaN	42.8866	NaN	NaN	60.1379	NaN	NaN
60	0.7	km	4	30.3423	NaN	NaN	19.466	NaN	NaN	42.7864	NaN	NaN	56.1883	NaN	NaN
70	0.7	km	4	27.0843	NaN	NaN	15.392	NaN	NaN	37.4183	NaN	NaN	45.4631	NaN	NaN
80	0.7	km	4	27.9426	NaN	NaN	11.7019	NaN	NaN	38.5201	NaN	NaN	41.5954	NaN	NaN
90	0.7	km	4	27.711	NaN	NaN	14.0489	NaN	NaN	36.8721	NaN	NaN	41.4627	NaN	NaN
100	0.7	km	4	29.6621	NaN	NaN	12.5684	NaN	NaN	38.0866	NaN	NaN	37.0192	NaN	NaN
5	0.8	km	4	167.053	NaN	NaN	NaN	NaN	NaN	336.942	NaN	NaN	NaN	NaN	NaN
10	0.8	km	4	121.908	NaN	NaN	NaN	NaN	NaN	200.164	NaN	NaN	NaN	NaN	NaN
20	0.8	km	4	77.8894	NaN	NaN	80.8903	NaN	NaN	110.119	NaN	NaN	186.723	NaN	NaN
30	0.8	km	4	65.1137	NaN	NaN	62.2354	NaN	NaN	87.3984	NaN	NaN	133.014	NaN	NaN
40	0.8	km	4	57.8437	NaN	NaN	27.7014	NaN	NaN	71.219	NaN	NaN	85.7214	NaN	NaN
50	0.8	km	4	56.1469	NaN	NaN	26.9245	NaN	NaN	65.9541	NaN	NaN	69.0494	NaN	NaN
60	0.8	km	4	54.6835	NaN	NaN	19.7024	NaN	NaN	64.3212	NaN	NaN	53.3174	NaN	NaN
70	0.8	km	4	50.4614	NaN	NaN	17.0617	NaN	NaN	57.9876	NaN	NaN	51.2406	NaN	NaN
80	0.8	km	4	49.6341	NaN	NaN	14.9042	NaN	NaN	55.6725	NaN	NaN	42.8271	NaN	NaN
90	0.8	km	4	48.9198	NaN	NaN	12.078	NaN	NaN	54.7341	NaN	NaN	36.8064	NaN	NaN
100	0.8	km	4	47.4823	NaN	NaN	10.1164	NaN	NaN	52.3473	NaN	NaN	35.8534	NaN	NaN
5	0.9	km	4	312.593	NaN	NaN	NaN	NaN	NaN	521.782	NaN	NaN	NaN	NaN	NaN
10	0.9	km	4	252.132	NaN	NaN	NaN	NaN	NaN	464.525	NaN	NaN	NaN	NaN	NaN
20	0.9	km	4	178.647	NaN	NaN	86.2217	NaN	NaN	267.382	NaN	NaN	223.803	NaN	NaN
30	0.9	km	4	136.866	NaN	NaN	60.3225	NaN	NaN	189.262	NaN	NaN	128.838	NaN	NaN
40	0.9	km	4	121.025	NaN	NaN	28.4063	NaN	NaN	145.907	NaN	NaN	81.2401	NaN	NaN
50	0.9	km	4	108.708	NaN	NaN	28.0545	NaN	NaN	121.801	NaN	NaN	71.5114	NaN	NaN
60	0.9	km	4	104.877	NaN	NaN	18.01	NaN	NaN	113.627	NaN	NaN	54.1284	NaN	NaN
70	0.9	km	4	98.4563	NaN	NaN	15.5123	NaN	NaN	105.122	NaN	NaN	44.8552	NaN	NaN
80	0.9	km	4	95.2481	NaN	NaN	11.0686	NaN	NaN	101.507	NaN	NaN	40.5825	NaN	NaN
90	0.9	km	4	93.7973	NaN	NaN	13.3995	NaN	NaN	99.4105	NaN	NaN	40.0037	NaN	NaN
100	0.9	km	4	91.236	NaN	NaN	9.46941	NaN	NaN	96.147	NaN	NaN	35.7144	NaN	NaN
5	0.1	km	5	6.40606	NaN	NaN	NaN	NaN	NaN	147.767	NaN	NaN	NaN	NaN	NaN
10	0.1	km	5	4.13537	NaN	NaN	NaN	NaN	NaN	104.666	NaN	NaN	NaN	NaN	NaN
20	0.1	km	5	1.89357	NaN	NaN	114.331	NaN	NaN	74.6585	NaN	NaN	307.303	NaN	NaN
30	0.1	km	5	-2.34263	NaN	NaN	79.6713	NaN	NaN	54.643	NaN	NaN	178.667	NaN	NaN
40	0.1	km	5	-0.84364	NaN	NaN	40.0129	NaN	NaN	56.3602	NaN	NaN	116.268	NaN	NaN
50	0.1	km	5	-2.3219	NaN	NaN	31.617	NaN	NaN	41.833	NaN	NaN	77.9021	NaN	NaN
60	0.1	km	5	0.311836	NaN	NaN	23.9623	NaN	NaN	47.303	NaN	NaN	69.2732	NaN	NaN
70	0.1	km	5	0.675908	NaN	NaN	23.94	NaN	NaN	37.6406	NaN	NaN	58.7024	NaN	NaN
80	0.1	km	5	1.57373	NaN	NaN	17.8506	NaN	NaN	37.9725	NaN	NaN	51.5243	NaN	NaN
90	0.1	km	5	-0.0308662	NaN	NaN	15.8006	NaN	NaN	35.9238	NaN	NaN	49.4969	NaN	NaN
100	0.1	km	5	1.40086	NaN	NaN	15.852	NaN	NaN	35.914	NaN	NaN	45.6094	NaN	NaN
5	0.2	km	5	17.4736	NaN	NaN	NaN	NaN	NaN	288.985	NaN	NaN	NaN	NaN	NaN
10	0.2	km	5	-0.760281	NaN	NaN	NaN	NaN	NaN	88.7329	NaN	NaN	NaN	NaN	NaN
20	0.2	km	5	0.891744	NaN	NaN	108.99	NaN	NaN	67.3141	NaN	NaN	273.032	NaN	NaN
30	0.2	km	5	1.93469	NaN	NaN	91.1178	NaN	NaN	60.5341	NaN	NaN	204.176	NaN	NaN
40	0.2	km	5	1.92514	NaN	NaN	40.6716	NaN	NaN	52.7055	NaN	NaN	95.1105	NaN	NaN
50	0.2	km	5	2.89556	NaN	NaN	36.5059	NaN	NaN	56.1637	NaN	NaN	86.6585	NaN	NaN
60	0.2	km	5	0.558986	NaN	NaN	22.6585	NaN	NaN	42.9213	NaN	NaN	65.4574	NaN	NaN
70	0.2	km	5	-2.23095	NaN	NaN	17.4729	NaN	NaN	33.576	NaN	NaN	53.9194	NaN	NaN
80	0.2	km	5	1.78908	NaN	NaN	18.5148	NaN	NaN	36.2268	NaN	NaN	53.8509	NaN	NaN
90	0.2	km	5	-0.861578	NaN	NaN	13.7883	NaN	NaN	34.0898	NaN	NaN	45.9948	NaN	NaN
100	0.2	km	5	1.94352	NaN	NaN	16.0584	NaN	NaN	39.4306	NaN	NaN	46.0345	NaN	NaN
5	0.3	km	5	10.9757	NaN	NaN	NaN	NaN	NaN	153.975	NaN	NaN	NaN	NaN	NaN
10	0.3	km	5	4.69121	NaN	NaN	NaN	NaN	NaN	112.045	NaN	NaN	NaN	NaN	NaN
20	0.3	km	5	6.98801	NaN	NaN	133.068	NaN	NaN	93.4017	NaN	NaN	428.246	NaN	NaN
30	0.3	km	5	2.9209	NaN	NaN	89.2466	NaN	NaN	65.3926	NaN	NaN	222.706	NaN	NaN
40	0.3	km	5	1.72464	NaN	NaN	37.5154	NaN	NaN	53.724	NaN	NaN	96.3881	NaN	NaN
50	0.3	km	5	3.35854	NaN	NaN	37.0845	NaN	NaN	46.1662	NaN	NaN	89.0359	NaN	NaN
60	0.3	km	5	2.81108	NaN	NaN	23.9744	NaN	NaN	52.0129	NaN	NaN	67.8738	NaN	NaN
70	0.3	km	5	2.13655	NaN	NaN	20.2262	NaN	NaN	45.4694	NaN	NaN	57.6751	NaN	NaN
80	0.3	km	5	3.25031	NaN	NaN	16.372	NaN	NaN	40.0413	NaN	NaN	55.0999	NaN	NaN
90	0.3	km	5	2.846	NaN	NaN	18.156	NaN	NaN	35.2093	NaN	NaN	50.4649	NaN	NaN
100	0.3	km	5	3.71163	NaN	NaN	14.5653	NaN	NaN	54.3197	NaN	NaN	44.5959	NaN	NaN
5	0.4	km	5	18.6967	NaN	NaN	NaN	NaN	NaN	132.406	NaN	NaN	NaN	NaN	NaN
10	0.4	km	5	6.14736	NaN	NaN	NaN	NaN	NaN	102.686	NaN	NaN	NaN	NaN	NaN
20	0.4	km	5	5.71777	NaN	NaN	115.986	NaN	NaN	71.4498	NaN	NaN	299.757	NaN	NaN
30	0.4	km	5	4.21037	NaN	NaN	87.0782	NaN	NaN	52.0052	NaN	NaN	175.389	NaN	NaN
40	0.4	km	5	5.14424	NaN	NaN	41.5645	NaN	NaN	53.4143	NaN	NaN	114.976	NaN	NaN
50	0.4	km	5	6.10238	NaN	NaN	36.1448	NaN	NaN	57.9064	NaN	NaN	93.3504	NaN	NaN
60	0.4	km	5	2.4192	NaN	NaN	22.7025	NaN	NaN	39.687	NaN	NaN	68.6477	NaN	NaN
70	0.4	km	5	5.44616	NaN	NaN	24.767	NaN	NaN	45.0105	NaN	NaN	64.387	NaN	NaN
80	0.4	km	5	3.28491	NaN	NaN	19.1219	NaN	NaN	35.4226	NaN	NaN	55.3947	NaN	NaN
90	0.4	km	5	2.53192	NaN	NaN	13.9143	NaN	NaN	38.255	NaN	NaN	46.9474	NaN	NaN
100	0.4	km	5	4.9141	NaN	NaN	15.2308	NaN	NaN	35.0172	NaN	NaN	49.2968	NaN	NaN
5	0.5	km	5	54.8511	NaN	NaN	NaN	NaN	NaN	344.85	NaN	NaN	NaN	NaN	NaN
10	0.5	km	5	11.0926	NaN	NaN	NaN	NaN	NaN	89.3149	NaN	NaN	NaN	NaN	NaN
20	0.5	km	5	8.68365	NaN	NaN	110.601	NaN	NaN	81.4844	NaN	NaN	341.07	NaN	NaN
30	0.5	km	5	7.75022	NaN	NaN	83.3885	NaN	NaN	55.7537	NaN	NaN	188.329	NaN	NaN
40	0.5	km	5	7.59725	NaN	NaN	38.5516	NaN	NaN	51.0157	NaN	NaN	96.8361	NaN	NaN
50	0.5	km	5	6.38037	NaN	NaN	30.6972	NaN	NaN	45.4808	NaN	NaN	76.664	NaN	NaN
60	0.5	km	5	6.13857	NaN	NaN	21.1242	NaN	NaN	42.372	NaN	NaN	62.6254	NaN	NaN
70	0.5	km	5	6.65915	NaN	NaN	19.7347	NaN	NaN	37.5453	NaN	NaN	53.8313	NaN	NaN
80	0.5	km	5	7.17638	NaN	NaN	17.3295	NaN	NaN	35.4068	NaN	NaN	51.3847	NaN	NaN
90	0.5	km	5	7.03557	NaN	NaN	16.6694	NaN	NaN	34.4481	NaN	NaN	46.5248	NaN	NaN
100	0.5	km	5	6.39255	NaN	NaN	12.766	NaN	NaN	35.2067	NaN	NaN	43.2457	NaN	NaN
5	0.6	km	5	67.1621	NaN	NaN	NaN	NaN	NaN	231.385	NaN	NaN	NaN	NaN	NaN
10	0.6	km	5	33.7983	NaN	NaN	NaN	NaN	NaN	122.974	NaN	NaN	NaN	NaN	NaN
20	0.6	km	5	18.2526	NaN	NaN	108.621	NaN	NaN	77.8212	NaN	NaN	328.358	NaN	NaN
30	0.6	km	5	15.1466	NaN	NaN	85.6053	NaN	NaN	55.8906	NaN	NaN	184.113	NaN	NaN
40	0.6	km	5	13.5186	NaN	NaN	42.8826	NaN	NaN	53.437	NaN	NaN	110.446	NaN	NaN
50	0.6	km	5	13.3041	NaN	NaN	32.1666	NaN	NaN	53.5765	NaN	NaN	80.1928	NaN	NaN
60	0.6	km	5	14.1299	NaN	NaN	22.4368	NaN	NaN	44.1967	NaN	NaN	65.4972	NaN	NaN
70	0.6	km	5	13.8189	NaN	NaN	23.0182	NaN	NaN	43.0634	NaN	NaN	62.8735	NaN	NaN
80	0.6	km	5	13.2361	NaN	NaN	18.0264	NaN	NaN	37.1572	NaN	NaN	54.105	NaN	NaN
90	0.6	km	5	12.6467	NaN	NaN	14.1452	NaN	NaN	43.3863	NaN	NaN	47.4564	NaN	NaN
100	0.6	km	5	14.4652	NaN	NaN	14.0227	NaN	NaN	37.9587	NaN	NaN	44.9608	NaN	NaN
5	0.7	km	5	92.5497	NaN	NaN	NaN	NaN	NaN	214.983	NaN	NaN	NaN	NaN	NaN
10	0.7	km	5	71.5998	NaN	NaN	NaN	NaN	NaN	263.661	NaN	NaN	NaN	NaN	NaN
20	0.7	km	5	31.752	NaN	NaN	99.4718	NaN	NaN	75.4345	NaN	NaN	268.759	NaN	NaN
30	0.7	km	5	28.2978	NaN	NaN	87.7405	NaN	NaN	69.8911	NaN	NaN	220.617	NaN	NaN
40	0.7	km	5	26.9683	NaN	NaN	39.0588	NaN	NaN	59.4474	NaN	NaN	101.126	NaN	NaN
50	0.7	km	5	24.5983	NaN	NaN	31.2786	NaN	NaN	50.5854	NaN	NaN	79.5632	NaN	NaN
60	0.7	km	5	25.8928	NaN	NaN	26.1547	NaN	NaN	48.9679	NaN	NaN	71.5694	NaN	NaN
70	0.7	km	5	21.5789	NaN	NaN	19.8235	NaN	NaN	41.3735	NaN	NaN	55.5848	NaN	NaN
80	0.7	km	5	23.7205	NaN	NaN	15.1825	NaN	NaN	47.0733	NaN	NaN	51.7657	NaN	NaN
90	0.7	km	5	22.5924	NaN	NaN	17.553	NaN	NaN	40.8102	NaN	NaN	50.5236	NaN	NaN
100	0.7	km	5	25.1145	NaN	NaN	15.0554	NaN	NaN	42.5016	NaN	NaN	44.0545	NaN	NaN
5	0.8	km	5	189.613	NaN	NaN	NaN	NaN	NaN	481.192	NaN	NaN	NaN	NaN	NaN
10	0.8	km	5	125.222	NaN	NaN	NaN	NaN	NaN	238.78	NaN	NaN	NaN	NaN	NaN
20	0.8	km	5	74.9493	NaN	NaN	118.497	NaN	NaN	124.352	NaN	NaN	282.879	NaN	NaN
30	0.8	km	5	59.1196	NaN	NaN	85.4925	NaN	NaN	94.7665	NaN	NaN	187.027	NaN	NaN
40	0.8	km	5	51.2659	NaN	NaN	37.0868	NaN	NaN	78.5501	NaN	NaN	114.739	NaN	NaN
50	0.8	km	5	49.2838	NaN	NaN	35.0247	NaN	NaN	67.9151	NaN	NaN	86.8566	NaN	NaN
60	0.8	km	5	48.9259	NaN	NaN	23.1752	NaN	NaN	70.9312	NaN	NaN	64.7263	NaN	NaN
70	0.8	km	5	44.8552	NaN	NaN	21.7109	NaN	NaN	60.4678	NaN	NaN	65.1091	NaN	NaN
80	0.8	km	5	43.2079	NaN	NaN	17.8071	NaN	NaN	55.2493	NaN	NaN	51.3635	NaN	NaN
90	0.8	km	5	43.6957	NaN	NaN	15.7906	NaN	NaN	58.1067	NaN	NaN	45.0942	NaN	NaN
100	0.8	km	5	41.135	NaN	NaN	13.1833	NaN	NaN	51.4911	NaN	NaN	44.5731	NaN	NaN
5	0.9	km	5	346.286	NaN	NaN	NaN	NaN	NaN	686.115	NaN	NaN	NaN	NaN	NaN
10	0.9	km	5	264.81	NaN	NaN	NaN	NaN	NaN	581.036	NaN	NaN	NaN	NaN	NaN
20	0.9	km	5	186.654	NaN	NaN	117.677	NaN	NaN	332.302	NaN	NaN	339.015	NaN	NaN
30	0.9	km	5	140.592	NaN	NaN	83.759	NaN	NaN	228.563	NaN	NaN	190.744	NaN	NaN
40	0.9	km	5	118.228	NaN	NaN	37.7335	NaN	NaN	159.73	NaN	NaN	110.341	NaN	NaN
50	0.9	km	5	104.164	NaN	NaN	36.0564	NaN	NaN	121.076	NaN	NaN	92.2858	NaN	NaN
60	0.9	km	5	100.511	NaN	NaN	22.827	NaN	NaN	116.236	NaN	NaN	68.2378	NaN	NaN
70	0.9	km	5	92.7112	NaN	NaN	19.8696	NaN	NaN	103.554	NaN	NaN	56.4479	NaN	NaN
80	0.9	km	5	90.1272	NaN	NaN	14.6747	NaN	NaN	100.772	NaN	NaN	50.4326	NaN	NaN
90	0.9	km	5	88.1641	NaN	NaN	16.9252	NaN	NaN	98.7626	NaN	NaN	50.1528	NaN	NaN
100	0.9	km	5	86.6295	NaN	NaN	12.3939	NaN	NaN	97.4722	NaN	NaN	43.024	NaN	NaN

## Sheet: mixed GMs=1 & 5
Comparison of Methods for Analyzing Left-Censored Occupational Exposure Data
Tran Huynh, Gurumurthy Ramachandran, Sudipto Banerjee, Joao Monteiro, Mark Stenzel, Dale P Sandler, Lawrence S Engel, Richard K Kwok, Aaron Blair and Patricia A Stewart
N	p	Method	GSD	BiasAM	Bias95th	BiasAM (ml-AM)	BiasAM (MVUE-AM)	rMSEam	rMSE95th	rMSEam (ml-AM)	rMSEam (MVUE-AM)
5	0.1	beta	2	1.65934	1.35319	NaN	NaN	53.4708	60.8444	NaN	NaN
10	0.1	beta	2	0.526699	2.15448	NaN	NaN	35.5824	42.2456	NaN	NaN
20	0.1	beta	2	1.30689	3.04543	NaN	NaN	26.502	31.3532	NaN	NaN
30	0.1	beta	2	-1.59403	0.0222012	NaN	NaN	21.2953	25.5919	NaN	NaN
40	0.1	beta	2	0.230823	1.8321	NaN	NaN	17.773	21.1652	NaN	NaN
50	0.1	beta	2	-0.0372905	1.9395	NaN	NaN	16.8693	20.2935	NaN	NaN
60	0.1	beta	2	-0.298321	1.49211	NaN	NaN	14.6907	17.5077	NaN	NaN
70	0.1	beta	2	0.154823	2.10691	NaN	NaN	13.8006	16.6992	NaN	NaN
80	0.1	beta	2	0.29915	1.88232	NaN	NaN	12.8102	15.442	NaN	NaN
90	0.1	beta	2	-0.101412	1.46814	NaN	NaN	12.1237	14.7203	NaN	NaN
100	0.1	beta	2	-0.44367	1.39095	NaN	NaN	11.9617	14.424	NaN	NaN
5	0.2	beta	2	0.37345	-0.597084	NaN	NaN	54.9437	62.1085	NaN	NaN
10	0.2	beta	2	-0.119742	2.01458	NaN	NaN	37.4468	44.1161	NaN	NaN
20	0.2	beta	2	-0.715569	2.22195	NaN	NaN	26.7247	31.9041	NaN	NaN
30	0.2	beta	2	-0.867323	1.88437	NaN	NaN	21.7371	26.1028	NaN	NaN
40	0.2	beta	2	-1.06315	1.2595	NaN	NaN	18.259	21.9036	NaN	NaN
50	0.2	beta	2	0.0674095	2.67116	NaN	NaN	16.3908	19.9623	NaN	NaN
60	0.2	beta	2	0.157036	2.31169	NaN	NaN	14.9773	18.1883	NaN	NaN
70	0.2	beta	2	-1.38794	1.04054	NaN	NaN	13.5037	16.4362	NaN	NaN
80	0.2	beta	2	-0.291455	2.06097	NaN	NaN	13.2049	16.2072	NaN	NaN
90	0.2	beta	2	-0.149194	2.23151	NaN	NaN	12.2513	15.0649	NaN	NaN
100	0.2	beta	2	-0.814775	1.53355	NaN	NaN	11.6783	14.0526	NaN	NaN
5	0.3	beta	2	-0.613423	-0.0738373	NaN	NaN	51.01	58.9069	NaN	NaN
10	0.3	beta	2	-0.767847	1.68836	NaN	NaN	35.8847	43.229	NaN	NaN
20	0.3	beta	2	0.868639	3.66096	NaN	NaN	26.132	31.4352	NaN	NaN
30	0.3	beta	2	-1.22264	1.98359	NaN	NaN	19.8774	24.3899	NaN	NaN
40	0.3	beta	2	-1.60498	1.54359	NaN	NaN	18.7182	22.703	NaN	NaN
50	0.3	beta	2	0.0990589	3.33266	NaN	NaN	16.4709	20.0143	NaN	NaN
60	0.3	beta	2	-1.75818	1.26425	NaN	NaN	14.7479	18.3228	NaN	NaN
70	0.3	beta	2	-0.748603	2.21576	NaN	NaN	13.9132	16.9352	NaN	NaN
80	0.3	beta	2	-0.701466	2.55784	NaN	NaN	13.0446	15.951	NaN	NaN
90	0.3	beta	2	-0.687218	2.2603	NaN	NaN	12.1953	14.9403	NaN	NaN
100	0.3	beta	2	-1.13078	1.82817	NaN	NaN	11.7202	14.312	NaN	NaN
5	0.4	beta	2	-4.57112	-5.96356	NaN	NaN	47.175	55.2623	NaN	NaN
10	0.4	beta	2	-0.138535	2.28999	NaN	NaN	37.0965	44.5245	NaN	NaN
20	0.4	beta	2	-1.70151	0.979082	NaN	NaN	26.0276	30.6404	NaN	NaN
30	0.4	beta	2	-1.4687	1.21532	NaN	NaN	21.5977	25.6145	NaN	NaN
40	0.4	beta	2	-1.13942	0.984382	NaN	NaN	18.3023	21.7582	NaN	NaN
50	0.4	beta	2	-0.344352	2.88508	NaN	NaN	16.6656	19.9733	NaN	NaN
60	0.4	beta	2	-0.396774	2.06808	NaN	NaN	14.8153	18.0752	NaN	NaN
70	0.4	beta	2	-0.179365	2.54393	NaN	NaN	13.9398	16.5152	NaN	NaN
80	0.4	beta	2	-0.805078	1.97989	NaN	NaN	12.7788	15.3604	NaN	NaN
90	0.4	beta	2	-0.404901	2.39702	NaN	NaN	12.1752	15.2491	NaN	NaN
100	0.4	beta	2	-0.371353	2.61979	NaN	NaN	11.5858	14.3839	NaN	NaN
5	0.5	beta	2	3.95801	0.328823	NaN	NaN	52.1421	61.1773	NaN	NaN
10	0.5	beta	2	2.26954	1.24834	NaN	NaN	36.9167	44.0017	NaN	NaN
20	0.5	beta	2	0.0882819	0.286608	NaN	NaN	26.6406	31.5777	NaN	NaN
30	0.5	beta	2	-0.413352	0.0621725	NaN	NaN	21.3266	25.5355	NaN	NaN
40	0.5	beta	2	0.182297	1.41918	NaN	NaN	18.6973	22.7482	NaN	NaN
50	0.5	beta	2	1.09644	2.15091	NaN	NaN	16.6022	19.3217	NaN	NaN
60	0.5	beta	2	0.544022	1.62903	NaN	NaN	14.8091	18.1437	NaN	NaN
70	0.5	beta	2	0.452382	1.26506	NaN	NaN	13.7477	16.7349	NaN	NaN
80	0.5	beta	2	0.732526	1.81231	NaN	NaN	13.5534	16.5639	NaN	NaN
90	0.5	beta	2	1.14109	2.17148	NaN	NaN	12.0556	14.4966	NaN	NaN
100	0.5	beta	2	0.830465	1.63908	NaN	NaN	11.7068	14.0681	NaN	NaN
5	0.6	beta	2	8.59401	-1.83859	NaN	NaN	48.1232	56.5896	NaN	NaN
10	0.6	beta	2	3.59534	-1.75167	NaN	NaN	38.3473	45.4212	NaN	NaN
20	0.6	beta	2	2.12804	-0.865468	NaN	NaN	26.5256	31.5052	NaN	NaN
30	0.6	beta	2	1.64423	-0.939019	NaN	NaN	20.8046	25.345	NaN	NaN
40	0.6	beta	2	2.44655	-0.348254	NaN	NaN	18.3733	22.0599	NaN	NaN
50	0.6	beta	2	2.52583	-0.0108418	NaN	NaN	16.3093	19.6087	NaN	NaN
60	0.6	beta	2	1.82494	-0.788147	NaN	NaN	14.832	18.4508	NaN	NaN
70	0.6	beta	2	3.5056	0.62146	NaN	NaN	14.7055	16.7421	NaN	NaN
80	0.6	beta	2	2.53277	0.155136	NaN	NaN	13.226	15.7558	NaN	NaN
90	0.6	beta	2	2.19211	-0.750635	NaN	NaN	12.5068	14.5336	NaN	NaN
100	0.6	beta	2	2.81608	0.123315	NaN	NaN	11.7996	13.8776	NaN	NaN
5	0.7	beta	2	22.0579	0.47205	NaN	NaN	50.0521	55.0103	NaN	NaN
10	0.7	beta	2	8.64889	-5.54639	NaN	NaN	36.5845	42.2744	NaN	NaN
20	0.7	beta	2	4.41623	-4.94187	NaN	NaN	26.3881	30.0889	NaN	NaN
30	0.7	beta	2	5.24984	-2.9878	NaN	NaN	22.7337	25.4383	NaN	NaN
40	0.7	beta	2	5.66568	-2.16571	NaN	NaN	19.6439	22.3581	NaN	NaN
50	0.7	beta	2	5.5531	-1.48543	NaN	NaN	18.0058	19.6322	NaN	NaN
60	0.7	beta	2	5.4627	-1.81121	NaN	NaN	16.0653	18.2192	NaN	NaN
70	0.7	beta	2	5.93899	-0.965983	NaN	NaN	15.634	16.7831	NaN	NaN
80	0.7	beta	2	5.34102	-1.69146	NaN	NaN	14.1854	15.6228	NaN	NaN
90	0.7	beta	2	5.94021	-0.868195	NaN	NaN	13.7578	14.4016	NaN	NaN
100	0.7	beta	2	6.23763	-0.87209	NaN	NaN	13.4351	14.2792	NaN	NaN
5	0.8	beta	2	44.0173	8.38817	NaN	NaN	58.1799	50.879	NaN	NaN
10	0.8	beta	2	23.0356	-2.7066	NaN	NaN	41.6951	39.9651	NaN	NaN
20	0.8	beta	2	10.4205	-8.19734	NaN	NaN	31.6557	31.2997	NaN	NaN
30	0.8	beta	2	9.70195	-4.5732	NaN	NaN	27.6171	26.0577	NaN	NaN
40	0.8	beta	2	10.7779	-2.87249	NaN	NaN	24.1122	21.9863	NaN	NaN
50	0.8	beta	2	9.90611	-2.97324	NaN	NaN	22.1082	19.6101	NaN	NaN
60	0.8	beta	2	9.78329	-3.17463	NaN	NaN	20.6514	18.3144	NaN	NaN
70	0.8	beta	2	9.14071	-4.06785	NaN	NaN	18.574	16.7058	NaN	NaN
80	0.8	beta	2	10.8837	-2.28862	NaN	NaN	18.3238	15.5299	NaN	NaN
90	0.8	beta	2	9.74074	-2.60346	NaN	NaN	17.0826	14.5563	NaN	NaN
100	0.8	beta	2	10.1019	-3.0294	NaN	NaN	16.4852	13.7256	NaN	NaN
5	0.9	beta	2	94.9171	37.3202	NaN	NaN	102.06	65.6075	NaN	NaN
10	0.9	beta	2	59.2853	11.8614	NaN	NaN	73.8808	38.3314	NaN	NaN
20	0.9	beta	2	34.7961	-2.67785	NaN	NaN	55.6304	28.7851	NaN	NaN
30	0.9	beta	2	26.6668	-3.6885	NaN	NaN	46.4999	23.9398	NaN	NaN
40	0.9	beta	2	22.5275	-5.61896	NaN	NaN	43.3883	24.4332	NaN	NaN
50	0.9	beta	2	20.8154	-4.23742	NaN	NaN	38.0511	21.4087	NaN	NaN
60	0.9	beta	2	17.5166	-4.59106	NaN	NaN	35.0082	19.8845	NaN	NaN
70	0.9	beta	2	16.9342	-3.61023	NaN	NaN	32.6351	18.5249	NaN	NaN
80	0.9	beta	2	17.5795	-3.47702	NaN	NaN	31.359	17.7311	NaN	NaN
90	0.9	beta	2	16.4752	-3.3415	NaN	NaN	28.8791	15.5588	NaN	NaN
100	0.9	beta	2	16.6116	-3.09367	NaN	NaN	28.6179	14.8061	NaN	NaN
5	0.1	beta	3	2.28684	-8.13626	NaN	NaN	89.2476	83.9624	NaN	NaN
10	0.1	beta	3	1.65864	-4.6073	NaN	NaN	61.1343	60.035	NaN	NaN
20	0.1	beta	3	2.03534	-2.13081	NaN	NaN	43.652	45.2919	NaN	NaN
30	0.1	beta	3	-2.61437	-6.36977	NaN	NaN	37.0499	38.452	NaN	NaN
40	0.1	beta	3	-0.166147	-3.6143	NaN	NaN	29.8259	31.8909	NaN	NaN
50	0.1	beta	3	0.256097	-2.91653	NaN	NaN	29.1253	31.0132	NaN	NaN
60	0.1	beta	3	-0.871901	-4.07096	NaN	NaN	23.7031	25.6828	NaN	NaN
70	0.1	beta	3	0.703043	-2.26001	NaN	NaN	23.0687	24.8621	NaN	NaN
80	0.1	beta	3	-0.275764	-3.42371	NaN	NaN	21.2574	23.1979	NaN	NaN
90	0.1	beta	3	0.106868	-3.02976	NaN	NaN	21.5768	23.1515	NaN	NaN
100	0.1	beta	3	-0.501531	-3.44448	NaN	NaN	19.8612	21.6583	NaN	NaN
5	0.2	beta	3	2.04324	-9.89125	NaN	NaN	91.5509	85.5275	NaN	NaN
10	0.2	beta	3	-1.70746	-7.53874	NaN	NaN	59.4091	59.6014	NaN	NaN
20	0.2	beta	3	-0.65194	-4.76142	NaN	NaN	44.0473	45.5843	NaN	NaN
30	0.2	beta	3	-0.759675	-4.50982	NaN	NaN	37.0755	38.6509	NaN	NaN
40	0.2	beta	3	-0.180592	-3.63065	NaN	NaN	30.1641	32.2187	NaN	NaN
50	0.2	beta	3	0.554607	-2.85846	NaN	NaN	27.0395	29.0135	NaN	NaN
60	0.2	beta	3	0.678227	-2.69451	NaN	NaN	25.6855	27.6401	NaN	NaN
70	0.2	beta	3	-1.4263	-4.60615	NaN	NaN	23.3879	25.5994	NaN	NaN
80	0.2	beta	3	0.673217	-2.35878	NaN	NaN	23.4655	25.2843	NaN	NaN
90	0.2	beta	3	-0.00729544	-3.09775	NaN	NaN	21.0475	22.9422	NaN	NaN
100	0.2	beta	3	-0.233322	-3.2277	NaN	NaN	19.1845	20.9773	NaN	NaN
5	0.3	beta	3	-1.13739	-12.4354	NaN	NaN	83.0763	78.1395	NaN	NaN
10	0.3	beta	3	-0.0228677	-6.6424	NaN	NaN	58.5336	59.1757	NaN	NaN
20	0.3	beta	3	0.434216	-4.32557	NaN	NaN	42.45	43.9453	NaN	NaN
30	0.3	beta	3	-0.583822	-4.19656	NaN	NaN	33.6628	35.9766	NaN	NaN
40	0.3	beta	3	-2.20392	-5.75883	NaN	NaN	31.0223	33.2386	NaN	NaN
50	0.3	beta	3	1.23392	-2.13783	NaN	NaN	28.9779	30.3504	NaN	NaN
60	0.3	beta	3	-2.21193	-5.56577	NaN	NaN	25.1438	27.3034	NaN	NaN
70	0.3	beta	3	-0.609131	-3.82834	NaN	NaN	23.7486	25.5887	NaN	NaN
80	0.3	beta	3	0.107005	-2.85684	NaN	NaN	22.3583	24.1696	NaN	NaN
90	0.3	beta	3	-0.848745	-4.0776	NaN	NaN	20.7064	22.5226	NaN	NaN
100	0.3	beta	3	-1.23029	-4.30327	NaN	NaN	19.7468	21.7827	NaN	NaN
5	0.4	beta	3	-6.86444	-18.716	NaN	NaN	70.209	70.7177	NaN	NaN
10	0.4	beta	3	2.66382	-5.04489	NaN	NaN	63.6742	62.1907	NaN	NaN
20	0.4	beta	3	-1.69076	-6.8904	NaN	NaN	44.0173	44.5463	NaN	NaN
30	0.4	beta	3	-1.34686	-5.60028	NaN	NaN	35.1114	37.479	NaN	NaN
40	0.4	beta	3	-0.990871	-5.13673	NaN	NaN	29.8057	32.0669	NaN	NaN
50	0.4	beta	3	0.820118	-2.37748	NaN	NaN	27.7602	29.5546	NaN	NaN
60	0.4	beta	3	0.428032	-3.17874	NaN	NaN	25.6159	27.7761	NaN	NaN
70	0.4	beta	3	0.0520569	-3.22998	NaN	NaN	21.9323	23.7446	NaN	NaN
80	0.4	beta	3	-0.977478	-4.37828	NaN	NaN	20.6895	22.7976	NaN	NaN
90	0.4	beta	3	0.132203	-3.22808	NaN	NaN	20.6879	22.8573	NaN	NaN
100	0.4	beta	3	0.373834	-2.73126	NaN	NaN	19.4703	21.3501	NaN	NaN
5	0.5	beta	3	5.95195	-10.5137	NaN	NaN	95.453	84.1868	NaN	NaN
10	0.5	beta	3	3.8145	-6.52079	NaN	NaN	65.7729	63.0915	NaN	NaN
20	0.5	beta	3	-0.31657	-6.32061	NaN	NaN	42.697	44.272	NaN	NaN
30	0.5	beta	3	-1.95948	-7.05404	NaN	NaN	33.5896	36.0839	NaN	NaN
40	0.5	beta	3	-0.478295	-4.80216	NaN	NaN	31.2001	33.2876	NaN	NaN
50	0.5	beta	3	0.0044084	-4.01682	NaN	NaN	25.8739	27.9614	NaN	NaN
60	0.5	beta	3	0.419284	-3.36403	NaN	NaN	25.0411	27.1925	NaN	NaN
70	0.5	beta	3	0.206156	-3.61619	NaN	NaN	23.3524	25.6397	NaN	NaN
80	0.5	beta	3	0.884985	-2.76224	NaN	NaN	22.729	24.6605	NaN	NaN
90	0.5	beta	3	0.776925	-2.75888	NaN	NaN	20.4845	22.2488	NaN	NaN
100	0.5	beta	3	0.650048	-2.85898	NaN	NaN	19.4887	21.3775	NaN	NaN
5	0.6	beta	3	8.28226	-12.9107	NaN	NaN	97.3766	79.1577	NaN	NaN
10	0.6	beta	3	1.61416	-9.77126	NaN	NaN	60.4731	60.1192	NaN	NaN
20	0.6	beta	3	0.404915	-7.00086	NaN	NaN	42.0859	44.0236	NaN	NaN
30	0.6	beta	3	1.18306	-5.00613	NaN	NaN	38.3542	37.7402	NaN	NaN
40	0.6	beta	3	1.55268	-3.77455	NaN	NaN	30.5538	32.9419	NaN	NaN
50	0.6	beta	3	0.995503	-3.87949	NaN	NaN	26.891	29.0472	NaN	NaN
60	0.6	beta	3	-0.164326	-4.54796	NaN	NaN	24.7641	27.4377	NaN	NaN
70	0.6	beta	3	1.51003	-2.84277	NaN	NaN	23.0033	24.9453	NaN	NaN
80	0.6	beta	3	0.577298	-3.62643	NaN	NaN	21.7182	23.912	NaN	NaN
90	0.6	beta	3	-0.0766726	-4.34804	NaN	NaN	20.3109	22.6394	NaN	NaN
100	0.6	beta	3	0.58002	-3.5452	NaN	NaN	19.4674	21.7066	NaN	NaN
5	0.7	beta	3	20.9212	-11.1307	NaN	NaN	95.4587	74.2384	NaN	NaN
10	0.7	beta	3	6.84126	-11.953	NaN	NaN	61.5891	58.3763	NaN	NaN
20	0.7	beta	3	-1.37789	-12.2543	NaN	NaN	40.7682	43.8669	NaN	NaN
30	0.7	beta	3	0.563447	-7.79165	NaN	NaN	35.2273	37.5927	NaN	NaN
40	0.7	beta	3	0.936015	-6.47992	NaN	NaN	31.2248	33.1305	NaN	NaN
50	0.7	beta	3	1.16341	-5.07975	NaN	NaN	26.3678	28.901	NaN	NaN
60	0.7	beta	3	-0.0095961	-5.89525	NaN	NaN	23.6081	26.2914	NaN	NaN
70	0.7	beta	3	1.41392	-3.96257	NaN	NaN	23.9098	25.8301	NaN	NaN
80	0.7	beta	3	0.380714	-4.85515	NaN	NaN	20.9433	23.4996	NaN	NaN
90	0.7	beta	3	1.90768	-3.10834	NaN	NaN	20.0086	22.1368	NaN	NaN
100	0.7	beta	3	1.72505	-3.35176	NaN	NaN	20.0684	22.2526	NaN	NaN
5	0.8	beta	3	39.9132	1.00468	NaN	NaN	77.3387	66.2307	NaN	NaN
10	0.8	beta	3	17.8996	-9.96249	NaN	NaN	60.8558	59.7864	NaN	NaN
20	0.8	beta	3	3.35592	-13.9881	NaN	NaN	41.287	44.6909	NaN	NaN
30	0.8	beta	3	3.19377	-9.65567	NaN	NaN	35.0727	37.8732	NaN	NaN
40	0.8	beta	3	3.63909	-7.45819	NaN	NaN	30.6264	32.3625	NaN	NaN
50	0.8	beta	3	2.861	-5.93216	NaN	NaN	26.9544	29.52	NaN	NaN
60	0.8	beta	3	2.51592	-6.40253	NaN	NaN	25.3711	27.269	NaN	NaN
70	0.8	beta	3	0.914857	-7.4338	NaN	NaN	23.0065	25.5953	NaN	NaN
80	0.8	beta	3	3.00859	-4.65528	NaN	NaN	22.2628	24.3419	NaN	NaN
90	0.8	beta	3	2.28682	-4.77404	NaN	NaN	19.2497	21.6263	NaN	NaN
100	0.8	beta	3	2.02444	-5.43273	NaN	NaN	17.9808	20.2877	NaN	NaN
5	0.9	beta	3	116.24	44.0072	NaN	NaN	142.416	93.5306	NaN	NaN
10	0.9	beta	3	61.818	11.6424	NaN	NaN	87.0855	60.9773	NaN	NaN
20	0.9	beta	3	28.064	-7.65057	NaN	NaN	54.4825	42.2003	NaN	NaN
30	0.9	beta	3	18.9705	-8.98896	NaN	NaN	45.015	35.6232	NaN	NaN
40	0.9	beta	3	14.8685	-9.08626	NaN	NaN	42.1583	35.8399	NaN	NaN
50	0.9	beta	3	11.3563	-8.01502	NaN	NaN	36.3837	31.2357	NaN	NaN
60	0.9	beta	3	8.09704	-7.86256	NaN	NaN	32.6607	29.571	NaN	NaN
70	0.9	beta	3	9.18648	-6.09598	NaN	NaN	31.6523	28.7393	NaN	NaN
80	0.9	beta	3	8.18396	-5.92967	NaN	NaN	28.346	26.1248	NaN	NaN
90	0.9	beta	3	6.78764	-6.17266	NaN	NaN	26.2574	23.9447	NaN	NaN
100	0.9	beta	3	6.24256	-5.65789	NaN	NaN	24.9357	23.2067	NaN	NaN
5	0.1	beta	4	4.15571	-13.3194	NaN	NaN	130.101	100.358	NaN	NaN
10	0.1	beta	4	1.95397	-8.69639	NaN	NaN	88.4537	72.1233	NaN	NaN
20	0.1	beta	4	1.56995	-5.17716	NaN	NaN	58.1691	52.425	NaN	NaN
30	0.1	beta	4	-3.78033	-9.91222	NaN	NaN	60.4148	47.9692	NaN	NaN
40	0.1	beta	4	-1.05109	-6.18265	NaN	NaN	45.1596	41.7854	NaN	NaN
50	0.1	beta	4	0.6016	-4.44624	NaN	NaN	44.8587	40.1859	NaN	NaN
60	0.1	beta	4	-0.879382	-5.29644	NaN	NaN	33.2629	31.9893	NaN	NaN
70	0.1	beta	4	1.90058	-2.62241	NaN	NaN	35.091	32.5116	NaN	NaN
80	0.1	beta	4	-0.400498	-4.60194	NaN	NaN	31.5938	30.0573	NaN	NaN
90	0.1	beta	4	0.18455	-4.25499	NaN	NaN	37.2916	31.2585	NaN	NaN
100	0.1	beta	4	-0.129143	-4.19946	NaN	NaN	29.3674	28.0161	NaN	NaN
5	0.2	beta	4	3.46921	-16.1289	NaN	NaN	132.759	102.049	NaN	NaN
10	0.2	beta	4	-4.31755	-13.4155	NaN	NaN	79.6806	68.7863	NaN	NaN
20	0.2	beta	4	-0.85907	-7.7967	NaN	NaN	65.0378	56.5976	NaN	NaN
30	0.2	beta	4	-0.28505	-6.26903	NaN	NaN	57.463	49.0299	NaN	NaN
40	0.2	beta	4	-0.0185745	-5.28713	NaN	NaN	42.8861	39.6482	NaN	NaN
50	0.2	beta	4	1.04547	-4.02621	NaN	NaN	41.0826	37.363	NaN	NaN
60	0.2	beta	4	1.36157	-3.85529	NaN	NaN	44.4841	37.8007	NaN	NaN
70	0.2	beta	4	-1.91815	-6.47569	NaN	NaN	35.953	33.722	NaN	NaN
80	0.2	beta	4	1.6469	-2.99846	NaN	NaN	37.9897	34.2054	NaN	NaN
90	0.2	beta	4	0.125227	-4.19982	NaN	NaN	31.5985	29.7055	NaN	NaN
100	0.2	beta	4	-0.696052	-4.6869	NaN	NaN	27.9632	26.9876	NaN	NaN
5	0.3	beta	4	-3.41196	-21.1055	NaN	NaN	113.116	87.7271	NaN	NaN
10	0.3	beta	4	1.93374	-10.3139	NaN	NaN	86.0703	71.3519	NaN	NaN
20	0.3	beta	4	0.530875	-7.55448	NaN	NaN	67.1082	54.6167	NaN	NaN
30	0.3	beta	4	-0.192495	-6.26688	NaN	NaN	49.94	45.5486	NaN	NaN
40	0.3	beta	4	-2.13134	-7.55685	NaN	NaN	46.4699	42.5267	NaN	NaN
50	0.3	beta	4	1.18286	-4.18586	NaN	NaN	48.9977	39.4872	NaN	NaN
60	0.3	beta	4	-2.58961	-7.25286	NaN	NaN	35.1994	33.984	NaN	NaN
70	0.3	beta	4	-0.334537	-4.95659	NaN	NaN	36.2695	32.3578	NaN	NaN
80	0.3	beta	4	0.531682	-3.9063	NaN	NaN	34.7059	31.6433	NaN	NaN
90	0.3	beta	4	-1.03908	-5.44979	NaN	NaN	33.9742	30.5191	NaN	NaN
100	0.3	beta	4	-0.603669	-4.87919	NaN	NaN	31.5002	29.7099	NaN	NaN
5	0.4	beta	4	-7.7932	-25.6927	NaN	NaN	99.6044	82.2985	NaN	NaN
10	0.4	beta	4	3.80188	-10.509	NaN	NaN	99.2003	73.1498	NaN	NaN
20	0.4	beta	4	-3.13636	-11.2412	NaN	NaN	61.3648	51.8319	NaN	NaN
30	0.4	beta	4	-2.33456	-8.79701	NaN	NaN	49.6079	45.9071	NaN	NaN
40	0.4	beta	4	-2.56526	-8.19441	NaN	NaN	41.9274	39.3068	NaN	NaN
50	0.4	beta	4	1.7337	-3.59129	NaN	NaN	41.2794	37.9645	NaN	NaN
60	0.4	beta	4	0.612789	-4.46806	NaN	NaN	38.5625	35.9099	NaN	NaN
70	0.4	beta	4	-0.444931	-4.98352	NaN	NaN	31.5551	30.186	NaN	NaN
80	0.4	beta	4	-1.64507	-6.09383	NaN	NaN	30.2095	29.2356	NaN	NaN
90	0.4	beta	4	-0.382326	-4.83658	NaN	NaN	30.6368	29.2516	NaN	NaN
100	0.4	beta	4	-0.225306	-4.4453	NaN	NaN	27.5571	26.7902	NaN	NaN
5	0.5	beta	4	6.35389	-18.817	NaN	NaN	153.355	105.658	NaN	NaN
10	0.5	beta	4	4.4579	-10.8294	NaN	NaN	94.0624	73.3041	NaN	NaN
20	0.5	beta	4	-0.780549	-10.6413	NaN	NaN	61.272	52.6528	NaN	NaN
30	0.5	beta	4	-3.03993	-10.1097	NaN	NaN	48.2694	44.6183	NaN	NaN
40	0.5	beta	4	-0.0400621	-6.65572	NaN	NaN	47.625	42.2529	NaN	NaN
50	0.5	beta	4	-0.287951	-5.97511	NaN	NaN	37.8066	35.5445	NaN	NaN
60	0.5	beta	4	0.239213	-5.41393	NaN	NaN	38.1431	34.7594	NaN	NaN
70	0.5	beta	4	0.733094	-4.5462	NaN	NaN	36.0004	33.1929	NaN	NaN
80	0.5	beta	4	0.976436	-3.94543	NaN	NaN	34.8218	32.015	NaN	NaN
90	0.5	beta	4	1.54237	-3.20773	NaN	NaN	32.5882	29.8085	NaN	NaN
100	0.5	beta	4	0.665375	-3.89431	NaN	NaN	29.2882	27.8015	NaN	NaN
5	0.6	beta	4	7.88958	-21.5299	NaN	NaN	182.489	88.4344	NaN	NaN
10	0.6	beta	4	1.61004	-14.6202	NaN	NaN	87.4299	70.1925	NaN	NaN
20	0.6	beta	4	-0.223029	-11.0978	NaN	NaN	58.2147	51.9252	NaN	NaN
30	0.6	beta	4	2.76548	-7.21257	NaN	NaN	71.4491	46.547	NaN	NaN
40	0.6	beta	4	2.03861	-5.59814	NaN	NaN	50.2966	42.4546	NaN	NaN
50	0.6	beta	4	0.95162	-5.72054	NaN	NaN	39.967	36.1443	NaN	NaN
60	0.6	beta	4	-0.137089	-6.05906	NaN	NaN	35.994	34.1693	NaN	NaN
70	0.6	beta	4	1.25211	-4.43856	NaN	NaN	34.4916	31.4852	NaN	NaN
80	0.6	beta	4	0.822852	-4.65479	NaN	NaN	32.1864	30.1092	NaN	NaN
90	0.6	beta	4	-0.396609	-5.42343	NaN	NaN	30.794	29.24	NaN	NaN
100	0.6	beta	4	0.837185	-4.21998	NaN	NaN	31.0795	28.989	NaN	NaN
5	0.7	beta	4	23.2167	-18.1261	NaN	NaN	158.634	84.0045	NaN	NaN
10	0.7	beta	4	7.8219	-16.8081	NaN	NaN	95.9526	67.512	NaN	NaN
20	0.7	beta	4	-2.9729	-16.1468	NaN	NaN	61.3351	54.7002	NaN	NaN
30	0.7	beta	4	0.483719	-10.1114	NaN	NaN	53.3566	47.059	NaN	NaN
40	0.7	beta	4	0.36602	-8.6049	NaN	NaN	46.081	41.3603	NaN	NaN
50	0.7	beta	4	0.346251	-7.33422	NaN	NaN	38.7687	35.7159	NaN	NaN
60	0.7	beta	4	-1.61924	-8.68885	NaN	NaN	35.0459	32.7976	NaN	NaN
70	0.7	beta	4	0.575628	-6.37721	NaN	NaN	38.1209	33.1594	NaN	NaN
80	0.7	beta	4	-0.392643	-6.38198	NaN	NaN	32.1462	30.1388	NaN	NaN
90	0.7	beta	4	1.46556	-4.38426	NaN	NaN	30.2435	28.3417	NaN	NaN
100	0.7	beta	4	1.50857	-4.24443	NaN	NaN	31.6413	28.6673	NaN	NaN
5	0.8	beta	4	37.7143	-5.06948	NaN	NaN	104.103	76.3419	NaN	NaN
10	0.8	beta	4	16.0208	-13.9881	NaN	NaN	95.085	72.5847	NaN	NaN
20	0.8	beta	4	1.82027	-18.9363	NaN	NaN	59.2611	52.3882	NaN	NaN
30	0.8	beta	4	1.63134	-13.4793	NaN	NaN	50.8062	46.9225	NaN	NaN
40	0.8	beta	4	2.72529	-9.8443	NaN	NaN	46.3243	39.2783	NaN	NaN
50	0.8	beta	4	1.47924	-8.34009	NaN	NaN	37.1669	36.39	NaN	NaN
60	0.8	beta	4	2.16267	-7.3117	NaN	NaN	38.1794	34.0671	NaN	NaN
70	0.8	beta	4	-0.0780668	-8.58244	NaN	NaN	35.6539	32.8307	NaN	NaN
80	0.8	beta	4	0.970964	-6.5587	NaN	NaN	34.2905	32.0844	NaN	NaN
90	0.8	beta	4	1.35495	-5.71508	NaN	NaN	28.3705	27.5293	NaN	NaN
100	0.8	beta	4	-0.902061	-7.92783	NaN	NaN	24.346	24.7565	NaN	NaN
5	0.9	beta	4	132.787	49.4554	NaN	NaN	203.067	123.593	NaN	NaN
10	0.9	beta	4	64.8796	8.81643	NaN	NaN	111.276	73.885	NaN	NaN
20	0.9	beta	4	26.387	-11.2938	NaN	NaN	62.5443	50.3146	NaN	NaN
30	0.9	beta	4	16.2741	-13.2599	NaN	NaN	53.2429	43.5867	NaN	NaN
40	0.9	beta	4	12.8657	-11.5845	NaN	NaN	47.8888	41.7172	NaN	NaN
50	0.9	beta	4	8.948	-10.5125	NaN	NaN	45.4387	39.0077	NaN	NaN
60	0.9	beta	4	4.77336	-11.2047	NaN	NaN	37.914	36.1155	NaN	NaN
70	0.9	beta	4	7.77054	-8.81503	NaN	NaN	43.3545	35.4784	NaN	NaN
80	0.9	beta	4	6.04864	-7.97726	NaN	NaN	32.1379	30.8582	NaN	NaN
90	0.9	beta	4	4.6589	-7.76996	NaN	NaN	30.2617	28.9473	NaN	NaN
100	0.9	beta	4	4.40362	-7.4865	NaN	NaN	30.4612	28.8846	NaN	NaN
5	0.1	beta	5	2.63645	-20.3939	NaN	NaN	170.011	111.31	NaN	NaN
10	0.1	beta	5	4.32358	-10.7133	NaN	NaN	117.709	80.6905	NaN	NaN
20	0.1	beta	5	2.56947	-6.89609	NaN	NaN	79.8997	61.5887	NaN	NaN
30	0.1	beta	5	-1.01762	-10.6625	NaN	NaN	106.81	59.3754	NaN	NaN
40	0.1	beta	5	-1.62711	-8.36046	NaN	NaN	59.7688	48.1593	NaN	NaN
50	0.1	beta	5	-0.0857174	-6.96451	NaN	NaN	62.1313	46.3214	NaN	NaN
60	0.1	beta	5	-0.405014	-6.32335	NaN	NaN	51.5622	39.8243	NaN	NaN
70	0.1	beta	5	2.41476	-3.79913	NaN	NaN	49.5263	39.3399	NaN	NaN
80	0.1	beta	5	-0.00587771	-5.49423	NaN	NaN	45.4807	36.8244	NaN	NaN
90	0.1	beta	5	-0.684792	-5.77395	NaN	NaN	41.6697	34.8578	NaN	NaN
100	0.1	beta	5	-0.741408	-5.70301	NaN	NaN	38.7133	32.3346	NaN	NaN
5	0.2	beta	5	5.23352	-21.417	NaN	NaN	179.824	114.73	NaN	NaN
10	0.2	beta	5	-4.15315	-17.536	NaN	NaN	107.626	78.3046	NaN	NaN
20	0.2	beta	5	-1.77377	-11.1927	NaN	NaN	86.6068	63.1053	NaN	NaN
30	0.2	beta	5	-2.02918	-9.77101	NaN	NaN	72.6239	54.4015	NaN	NaN
40	0.2	beta	5	-0.325326	-7.16746	NaN	NaN	56.5862	45.4961	NaN	NaN
50	0.2	beta	5	1.56834	-5.19557	NaN	NaN	58.1473	44.3135	NaN	NaN
60	0.2	beta	5	1.25765	-5.73893	NaN	NaN	65.7278	43.7994	NaN	NaN
70	0.2	beta	5	-1.60928	-7.87213	NaN	NaN	57.4934	40.9346	NaN	NaN
80	0.2	beta	5	3.51571	-3.34885	NaN	NaN	63.1151	43.7889	NaN	NaN
90	0.2	beta	5	1.03846	-5.02623	NaN	NaN	55.5078	38.8358	NaN	NaN
100	0.2	beta	5	-0.510796	-5.41943	NaN	NaN	40.6312	33.2821	NaN	NaN
5	0.3	beta	5	-5.25972	-26.772	NaN	NaN	145.645	96.0837	NaN	NaN
10	0.3	beta	5	3.63033	-14.1617	NaN	NaN	121.983	78.2159	NaN	NaN
20	0.3	beta	5	0.213447	-10.6904	NaN	NaN	91.7407	60.868	NaN	NaN
30	0.3	beta	5	0.0578427	-8.20338	NaN	NaN	66.465	52.4221	NaN	NaN
40	0.3	beta	5	-3.86319	-10.8619	NaN	NaN	62.55	48.5899	NaN	NaN
50	0.3	beta	5	2.47256	-5.15138	NaN	NaN	83.018	47.3007	NaN	NaN
60	0.3	beta	5	-3.05986	-8.69267	NaN	NaN	46.5401	39.6727	NaN	NaN
70	0.3	beta	5	-1.11523	-6.71988	NaN	NaN	45.2806	37.2416	NaN	NaN
80	0.3	beta	5	-0.105159	-5.54395	NaN	NaN	42.1909	35.4789	NaN	NaN
90	0.3	beta	5	-1.62616	-6.68857	NaN	NaN	41.0501	33.9343	NaN	NaN
100	0.3	beta	5	0.0272126	-5.4426	NaN	NaN	43.8127	35.2693	NaN	NaN
5	0.4	beta	5	-6.71657	-29.1334	NaN	NaN	127.754	90.2583	NaN	NaN
10	0.4	beta	5	3.7644	-15.0814	NaN	NaN	129.321	81.0013	NaN	NaN
20	0.4	beta	5	-3.41764	-14.5206	NaN	NaN	86.4016	58.3015	NaN	NaN
30	0.4	beta	5	-3.86249	-11.8104	NaN	NaN	63.0311	51.6318	NaN	NaN
40	0.4	beta	5	-2.25889	-9.44954	NaN	NaN	57.7179	46.4057	NaN	NaN
50	0.4	beta	5	1.13248	-6.15791	NaN	NaN	55.5232	43.9765	NaN	NaN
60	0.4	beta	5	1.1486	-5.62271	NaN	NaN	54.1968	42.5712	NaN	NaN
70	0.4	beta	5	0.0508684	-5.67991	NaN	NaN	42.6703	35.6953	NaN	NaN
80	0.4	beta	5	-2.22432	-7.48664	NaN	NaN	40.0662	34.487	NaN	NaN
90	0.4	beta	5	-0.136161	-5.51134	NaN	NaN	42.589	35.1021	NaN	NaN
100	0.4	beta	5	-1.13507	-5.99393	NaN	NaN	36.7964	31.7926	NaN	NaN
5	0.5	beta	5	7.71395	-24.4275	NaN	NaN	225.465	125.19	NaN	NaN
10	0.5	beta	5	2.87608	-16.6929	NaN	NaN	123.019	79.1491	NaN	NaN
20	0.5	beta	5	-0.213287	-13.3677	NaN	NaN	83.3914	60.7785	NaN	NaN
30	0.5	beta	5	-1.09499	-11.4386	NaN	NaN	73.338	52.5292	NaN	NaN
40	0.5	beta	5	0.243161	-8.46461	NaN	NaN	67.3683	49.3214	NaN	NaN
50	0.5	beta	5	0.159206	-7.17378	NaN	NaN	52.6952	42.2529	NaN	NaN
60	0.5	beta	5	0.336481	-7.07758	NaN	NaN	52.53	40.4475	NaN	NaN
70	0.5	beta	5	1.11959	-5.78761	NaN	NaN	51.8111	39.8993	NaN	NaN
80	0.5	beta	5	1.04867	-5.29469	NaN	NaN	50.8071	38.1055	NaN	NaN
90	0.5	beta	5	1.17211	-4.87597	NaN	NaN	47.8117	36.1428	NaN	NaN
100	0.5	beta	5	1.54003	-4.58008	NaN	NaN	46.2591	34.875	NaN	NaN
5	0.6	beta	5	6.97771	-28.4614	NaN	NaN	308.323	95.3297	NaN	NaN
10	0.6	beta	5	1.72066	-19.5279	NaN	NaN	115.491	75.1218	NaN	NaN
20	0.6	beta	5	-2.66802	-15.369	NaN	NaN	71.7756	57.0554	NaN	NaN
30	0.6	beta	5	2.88425	-10.7134	NaN	NaN	122.35	53.7229	NaN	NaN
40	0.6	beta	5	1.47902	-8.70651	NaN	NaN	72.9295	48.4026	NaN	NaN
50	0.6	beta	5	-0.0710295	-8.39129	NaN	NaN	53.6865	41.6683	NaN	NaN
60	0.6	beta	5	-0.465765	-7.8639	NaN	NaN	49.0664	40.6302	NaN	NaN
70	0.6	beta	5	0.213014	-6.87071	NaN	NaN	48.1076	36.8241	NaN	NaN
80	0.6	beta	5	0.699117	-6.14743	NaN	NaN	43.4783	34.6571	NaN	NaN
90	0.6	beta	5	0.0564241	-6.1502	NaN	NaN	44.2292	34.7551	NaN	NaN
100	0.6	beta	5	0.704104	-5.26458	NaN	NaN	40.1972	33.212	NaN	NaN
5	0.7	beta	5	26.5758	-23.2792	NaN	NaN	233.539	89.3012	NaN	NaN
10	0.7	beta	5	9.87962	-21.5008	NaN	NaN	144.024	72.8623	NaN	NaN
20	0.7	beta	5	-6.12386	-20.9384	NaN	NaN	83.2554	62.0679	NaN	NaN
30	0.7	beta	5	0.593681	-12.7703	NaN	NaN	71.0795	53.9461	NaN	NaN
40	0.7	beta	5	1.14948	-10.334	NaN	NaN	64.6341	47.9862	NaN	NaN
50	0.7	beta	5	0.70113	-8.95259	NaN	NaN	56.0861	41.414	NaN	NaN
60	0.7	beta	5	-2.1803	-11.04	NaN	NaN	48.7757	37.5313	NaN	NaN
70	0.7	beta	5	0.485874	-8.29771	NaN	NaN	57.7616	39.9508	NaN	NaN
80	0.7	beta	5	-0.611862	-8.00895	NaN	NaN	45.403	35.5395	NaN	NaN
90	0.7	beta	5	0.945612	-6.338	NaN	NaN	42.4923	33.4687	NaN	NaN
100	0.7	beta	5	1.33025	-5.93476	NaN	NaN	47.5085	34.2802	NaN	NaN
5	0.8	beta	5	34.4666	-10.093	NaN	NaN	134.264	83.3295	NaN	NaN
10	0.8	beta	5	15.7234	-17.0026	NaN	NaN	136.438	83.9599	NaN	NaN
20	0.8	beta	5	0.592384	-23.1581	NaN	NaN	82.7874	56.8446	NaN	NaN
30	0.8	beta	5	1.21335	-16.2121	NaN	NaN	69.7113	53.6569	NaN	NaN
40	0.8	beta	5	3.69041	-11.6891	NaN	NaN	71.0023	45.937	NaN	NaN
50	0.8	beta	5	0.410702	-10.9373	NaN	NaN	48.1176	41.358	NaN	NaN
60	0.8	beta	5	1.84437	-9.15503	NaN	NaN	53.4266	39.0462	NaN	NaN
70	0.8	beta	5	0.452585	-10.0217	NaN	NaN	52.2914	38.4704	NaN	NaN
80	0.8	beta	5	1.04312	-8.03436	NaN	NaN	50.3948	37.2992	NaN	NaN
90	0.8	beta	5	1.70233	-6.62278	NaN	NaN	41.2594	33.6457	NaN	NaN
100	0.8	beta	5	-2.34586	-9.97958	NaN	NaN	31.714	28.4091	NaN	NaN
5	0.9	beta	5	144.646	48.294	NaN	NaN	266.861	135.322	NaN	NaN
10	0.9	beta	5	61.7749	4.41407	NaN	NaN	139.843	80.9653	NaN	NaN
20	0.9	beta	5	25.5525	-15.0821	NaN	NaN	75.7134	56.2785	NaN	NaN
30	0.9	beta	5	13.7418	-17.0796	NaN	NaN	68.4808	49.5959	NaN	NaN
40	0.9	beta	5	8.23336	-15.3367	NaN	NaN	54.9023	46.3341	NaN	NaN
50	0.9	beta	5	7.4684	-12.6279	NaN	NaN	63.3525	42.922	NaN	NaN
60	0.9	beta	5	3.67271	-15.0487	NaN	NaN	56.4805	39.8352	NaN	NaN
70	0.9	beta	5	7.773	-11.3817	NaN	NaN	64.7079	41.7921	NaN	NaN
80	0.9	beta	5	3.94228	-10.9524	NaN	NaN	40.5387	34.7206	NaN	NaN
90	0.9	beta	5	1.38055	-11.6197	NaN	NaN	37.9423	33.2383	NaN	NaN
100	0.9	beta	5	3.32299	-9.71945	NaN	NaN	41.4172	34.042	NaN	NaN
5	0.1	ml	2	NaN	11.4771	14.1868	-3.91617	55.4224	82.8391	70.4773	51.1371
10	0.1	ml	2	NaN	10.4997	9.3947	-0.151846	39.5099	54.8671	45.0595	36.7108
20	0.1	ml	2	NaN	11.0209	8.21098	3.36177	30.6635	40.3355	32.7464	29.4601
30	0.1	ml	2	NaN	7.37159	4.27263	1.09642	24.0009	31.5809	25.0481	23.3287
40	0.1	ml	2	NaN	9.04112	5.71083	3.29403	20.2156	26.4313	21.0192	19.7276
50	0.1	ml	2	NaN	9.77643	5.66546	3.65697	19.7902	26.2602	20.4641	19.3379
60	0.1	ml	2	NaN	9.00495	5.06025	3.39941	17.2485	22.8473	17.7651	16.9098
70	0.1	ml	2	NaN	9.59303	5.39743	3.95038	16.2095	21.7474	16.6747	15.9008
80	0.1	ml	2	NaN	9.96464	5.86295	4.58972	15.4556	20.9107	15.8894	15.162
90	0.1	ml	2	NaN	9.30714	5.24931	4.12083	14.6474	19.8739	15.0143	14.3931
100	0.1	ml	2	NaN	9.15167	4.81773	3.78816	14.3468	19.5042	14.6636	14.1214
5	0.2	ml	2	NaN	16.4883	31.3299	-3.52509	79.5224	106.248	205.909	54.8764
10	0.2	ml	2	NaN	12.0812	10.3392	0.483118	42.4227	58.6676	48.0497	39.7037
20	0.2	ml	2	NaN	11.7028	7.45852	2.2268	30.8069	41.671	33.0238	29.3912
30	0.2	ml	2	NaN	11.6332	6.87297	3.33391	25.5464	34.7462	26.8928	24.6282
40	0.2	ml	2	NaN	9.94086	5.57561	3.00265	21.2601	28.6042	22.1134	20.6913
50	0.2	ml	2	NaN	12.2475	7.13854	4.98953	19.7698	27.2539	20.5507	19.2357
60	0.2	ml	2	NaN	11.2256	6.63065	4.87868	18.1977	24.8429	18.8213	17.7605
70	0.2	ml	2	NaN	9.93447	5.00283	3.49807	15.7519	21.998	16.2176	15.4275
80	0.2	ml	2	NaN	10.8333	5.92439	4.59991	15.8542	21.9983	16.303	15.5368
90	0.2	ml	2	NaN	11.4473	6.31715	5.11527	15.2476	21.4977	15.6702	14.9421
100	0.2	ml	2	NaN	10.4797	5.43608	4.36342	14.2841	20.0175	14.6317	14.0338
5	0.3	ml	2	NaN	16.854	24.6778	-4.40915	61.3683	92.1953	137.801	50.0565
10	0.3	ml	2	NaN	12.2375	10.5606	-0.531132	40.9052	58.1624	47.4949	37.6071
20	0.3	ml	2	NaN	14.1476	10.0694	4.64252	30.9266	42.4849	33.3821	29.4045
30	0.3	ml	2	NaN	11.5868	6.70108	3.12808	23.1847	32.4657	24.5125	22.2871
40	0.3	ml	2	NaN	10.9675	5.90776	3.20554	21.6812	29.9811	22.6049	21.0299
50	0.3	ml	2	NaN	12.9329	7.51517	5.32121	19.7381	27.3649	20.5344	19.206
60	0.3	ml	2	NaN	10.5413	5.30178	3.49631	17.6757	25.0966	18.2648	17.2335
70	0.3	ml	2	NaN	11.5194	6.26199	4.71011	16.8585	23.6618	17.3932	16.4712
80	0.3	ml	2	NaN	11.6807	6.11533	4.73824	15.8048	22.382	16.2688	15.4705
90	0.3	ml	2	NaN	11.485	6.15225	4.93187	14.9467	21.3456	15.367	14.6387
100	0.3	ml	2	NaN	10.916	5.58586	4.49035	14.2654	20.4339	14.6273	13.9938
5	0.4	ml	2	NaN	6.62953	19.018	-8.72725	54.0258	73.8917	123.132	46.1517
10	0.4	ml	2	NaN	14.0504	12.6856	0.482343	42.8582	61.4169	50.5924	38.7869
20	0.4	ml	2	NaN	9.94572	6.77917	1.48031	29.0315	39.0063	31.1	27.7346
30	0.4	ml	2	NaN	9.28834	5.72131	2.29622	24.157	32.2117	25.3017	23.4465
40	0.4	ml	2	NaN	8.94993	5.72567	3.21386	20.7799	27.7839	21.6129	20.242
50	0.4	ml	2	NaN	10.8165	6.33231	4.2173	19.1837	25.9889	19.8927	18.7107
60	0.4	ml	2	NaN	9.76437	5.978	4.26098	17.0962	23.3492	17.6732	16.7044
70	0.4	ml	2	NaN	10.2018	6.08483	4.60923	16.3108	21.9148	16.8022	15.9869
80	0.4	ml	2	NaN	9.90583	5.62231	4.31562	15.1723	20.8977	15.6013	14.8697
90	0.4	ml	2	NaN	10.2974	5.94445	4.77051	14.6373	20.6712	15.0446	14.3452
100	0.4	ml	2	NaN	10.6099	5.98769	4.9158	14.2864	20.1769	14.6556	14.0184
5	0.5	ml	2	NaN	11.7081	25.9828	-0.585837	60.1605	85.2756	131.719	48.3446
10	0.5	ml	2	NaN	8.62769	11.8442	1.80531	39.5074	54.7311	45.5799	36.7283
20	0.5	ml	2	NaN	6.84717	7.18989	2.33928	29.7774	39.3272	31.8555	28.4584
30	0.5	ml	2	NaN	6.07761	5.70308	2.60238	23.5517	30.9078	24.6415	22.882
40	0.5	ml	2	NaN	7.41287	6.05714	3.64412	21.2015	28.1836	22.0912	20.5344
50	0.5	ml	2	NaN	7.94601	6.63018	4.73629	18.6221	23.6866	19.2666	18.2445
60	0.5	ml	2	NaN	7.02806	5.68599	4.1291	16.5735	21.8033	17.0979	16.247
70	0.5	ml	2	NaN	6.70918	5.57908	4.25634	15.7248	20.5044	16.1709	15.4422
80	0.5	ml	2	NaN	7.30031	5.80128	4.62966	15.6194	20.3176	16.0247	15.3558
90	0.5	ml	2	NaN	7.54562	6.10772	5.06813	14.0877	18.0838	14.4587	13.8583
100	0.5	ml	2	NaN	6.86226	5.62381	4.69851	13.5919	17.4005	13.9132	13.3882
5	0.6	ml	2	NaN	6.9988	34.9229	4.41349	80.7955	74.4909	349.232	43.0506
10	0.6	ml	2	NaN	5.28478	21.2822	3.30044	87.5491	56.6678	221.203	38.698
20	0.6	ml	2	NaN	3.46514	7.96498	3.60675	28.7303	37.2366	30.6234	27.6631
30	0.6	ml	2	NaN	2.71109	6.38079	3.60739	21.9851	28.6249	23.0332	21.3602
40	0.6	ml	2	NaN	2.98192	6.63389	4.61151	19.6244	24.9088	20.3638	19.2283
50	0.6	ml	2	NaN	3.25151	6.52165	4.91259	17.7789	22.3439	18.3781	17.442
60	0.6	ml	2	NaN	2.32771	5.58524	4.2583	16.3243	20.927	16.7945	16.0522
70	0.6	ml	2	NaN	3.56841	6.98101	5.85487	16.0783	18.7433	16.5086	15.8483
80	0.6	ml	2	NaN	3.25624	6.16622	5.17076	14.6898	17.7734	15.0598	14.4865
90	0.6	ml	2	NaN	2.01185	5.46803	4.61287	13.5087	15.8903	13.8083	13.3509
100	0.6	ml	2	NaN	3.03605	6.1986	5.41322	13.1176	15.4193	13.4214	12.9539
5	0.7	ml	2	NaN	8.9267	50.3007	19.3668	82.6646	84.241	281.639	45.6807
10	0.7	ml	2	NaN	-0.452072	22.1233	9.02904	64.6924	53.1396	115.098	36.4304
20	0.7	ml	2	NaN	-2.4188	9.38865	5.53246	26.8555	33.1331	28.3896	26.3219
30	0.7	ml	2	NaN	-1.22876	8.76636	6.38425	23.2757	27.3211	24.1968	22.8432
40	0.7	ml	2	NaN	-0.453045	8.87469	7.14672	20.3422	24.0917	21.065	19.9803
50	0.7	ml	2	NaN	0.18005	8.54801	7.16071	18.6221	20.8429	19.1694	18.3903
60	0.7	ml	2	NaN	-0.130983	8.3403	7.19815	17.1365	19.6667	17.6175	16.9109
70	0.7	ml	2	NaN	0.642928	8.63039	7.64301	16.429	17.793	16.8464	16.2414
80	0.7	ml	2	NaN	-0.250699	7.82848	6.9887	15.0787	16.5084	15.4364	14.9142
90	0.7	ml	2	NaN	0.576719	8.33487	7.57617	14.6787	15.3044	15.0129	14.5277
100	0.7	ml	2	NaN	0.492717	8.47405	7.79646	14.3406	15.0174	14.6512	14.1979
5	0.8	ml	2	NaN	10.6553	57.331	43.2909	61.1373	66.8152	86.7251	55.9104
10	0.8	ml	2	NaN	1.5929	36.299	24.0556	53.9695	47.3507	84.1534	41.5564
20	0.8	ml	2	NaN	-6.04523	15.9645	12.083	31.837	32.6997	33.3183	31.5152
30	0.8	ml	2	NaN	-2.96455	13.6954	11.3347	27.8551	27.2109	28.5657	27.8071
40	0.8	ml	2	NaN	-1.73626	13.8333	12.1865	24.469	22.9566	25.0889	24.3002
50	0.8	ml	2	NaN	-2.0651	12.393	11.1607	22.3786	20.2313	22.8437	22.2627
60	0.8	ml	2	NaN	-2.39044	12.2962	11.3042	21.2246	18.9679	21.6433	21.0682
70	0.8	ml	2	NaN	-3.39874	11.2965	10.4724	18.9651	17.0163	19.309	18.8597
80	0.8	ml	2	NaN	-1.61296	12.9067	12.1787	19.0277	16.0362	19.3798	18.9046
90	0.8	ml	2	NaN	-1.99718	11.5388	10.8871	17.4677	14.8959	17.771	17.3604
100	0.8	ml	2	NaN	-2.3724	11.9845	11.4118	17.298	14.1872	17.5756	17.2019
5	0.9	ml	2	NaN	38.9294	110.689	96.1009	105.837	83.4828	119.917	102.405
10	0.9	ml	2	NaN	14.3982	70.6038	63.0813	78.0434	43.4494	82.6756	76.5155
20	0.9	ml	2	NaN	-0.607237	43.2326	38.9936	59.224	28.5062	61.7573	58.0559
30	0.9	ml	2	NaN	-2.01982	32.4139	30.2501	48.0628	23.5312	48.5764	48.1061
40	0.9	ml	2	NaN	-4.12148	27.5229	25.6361	44.2748	23.8715	44.6669	44.4965
50	0.9	ml	2	NaN	-3.31801	24.3944	23.2489	38.819	20.808	39.1144	38.8821
60	0.9	ml	2	NaN	-3.70818	20.598	19.5653	35.3666	19.2211	35.5939	35.5124
70	0.9	ml	2	NaN	-2.72807	19.902	19.0413	33.3653	18.2611	33.587	33.3767
80	0.9	ml	2	NaN	-2.77542	20.3115	19.5559	32.0571	17.4149	32.2774	32.0956
90	0.9	ml	2	NaN	-2.7353	18.7528	18.1401	29.3818	15.285	29.5827	29.3658
100	0.9	ml	2	NaN	-2.4877	18.8239	18.2766	29.1107	14.5933	29.2951	29.089
5	0.1	ml	3	NaN	20.4394	40.3255	-7.70139	108.78	146.812	199.028	76.0095
10	0.1	ml	3	NaN	12.2424	20.9508	-1.14147	74.9512	83.2663	97.5216	57.0099
20	0.1	ml	3	NaN	8.82096	13.2424	2.85201	51.0923	56.9444	56.6007	45.3641
30	0.1	ml	3	NaN	1.90226	5.4233	-1.1929	37.715	41.7394	40.2143	34.7246
40	0.1	ml	3	NaN	3.40374	6.51204	1.57355	30.1331	33.1632	31.683	28.4216
50	0.1	ml	3	NaN	4.49011	7.11132	2.88529	30.1823	32.9447	31.5254	28.4547
60	0.1	ml	3	NaN	2.57435	5.24539	1.81693	25.309	27.5242	26.2185	24.1589
70	0.1	ml	3	NaN	3.99976	6.38431	3.30608	23.7104	25.7041	24.5435	22.6232
80	0.1	ml	3	NaN	3.5457	5.98454	3.28706	22.5316	24.3969	23.2381	21.5621
90	0.1	ml	3	NaN	3.34251	5.76046	3.33138	21.4308	23.1559	22.0446	20.5573
100	0.1	ml	3	NaN	2.88738	5.13788	2.90338	21.176	22.7484	21.7004	20.3847
5	0.2	ml	3	NaN	29.7246	4477.89	-5.751	4036.15	227.253	129240	90.9277
10	0.2	ml	3	NaN	10.0101	18.7236	-3.00016	75.8655	85.9731	97.4634	59.148
20	0.2	ml	3	NaN	6.85146	11.3269	0.682351	49.6096	54.927	55.2383	43.4156
30	0.2	ml	3	NaN	5.20844	8.78391	1.72623	40.1251	44.0798	43.0698	36.4807
40	0.2	ml	3	NaN	4.2106	7.33457	2.08371	32.7316	36.056	34.5118	30.5614
50	0.2	ml	3	NaN	5.25713	8.0769	3.79655	28.7184	31.5104	30.0917	27.0224
60	0.2	ml	3	NaN	4.02961	6.93544	3.3502	27.3345	29.623	28.4425	25.7189
70	0.2	ml	3	NaN	1.99559	4.58478	1.56466	23.0892	25.4293	23.8282	22.106
80	0.2	ml	3	NaN	3.94179	6.37496	3.61427	24.127	26.2104	24.8777	23.0545
90	0.2	ml	3	NaN	3.5619	5.99386	3.51004	22.4367	24.2672	23.0816	21.4609
100	0.2	ml	3	NaN	3.35298	5.68376	3.43379	20.3701	22.0087	20.9174	19.5709
5	0.3	ml	3	NaN	21.4107	65.8605	-9.14445	133.926	146.929	402.415	72.4292
10	0.3	ml	3	NaN	11.1661	21.4472	-2.93823	69.3915	81.1774	89.1937	54.675
20	0.3	ml	3	NaN	8.62555	13.9341	2.82535	53.7648	58.9481	60.2476	46.176
30	0.3	ml	3	NaN	5.62318	9.12001	1.923	36.9478	41.2597	39.7954	33.6031
40	0.3	ml	3	NaN	2.62739	5.92065	0.632706	32.8688	36.2381	34.6155	30.6043
50	0.3	ml	3	NaN	6.2853	9.11378	4.70017	30.3243	33.3646	31.7881	28.5184
60	0.3	ml	3	NaN	2.39019	5.19958	1.58927	27.1399	30.0227	28.1662	25.6555
70	0.3	ml	3	NaN	3.61846	6.2562	3.12458	25.2096	27.553	26.086	23.9622
80	0.3	ml	3	NaN	3.66385	6.10048	3.3112	23.2001	25.2227	23.9354	22.1412
90	0.3	ml	3	NaN	3.09552	5.69764	3.21309	21.5778	23.4986	22.2116	20.6162
100	0.3	ml	3	NaN	1.9331	4.45415	2.2287	20.6762	22.5563	21.186	19.8635
5	0.4	ml	3	NaN	9.24482	1542.78	-14.3888	1735.31	114.06	30727.3	62.6156
10	0.4	ml	3	NaN	14.2248	30.6009	-0.177831	103.589	93.8961	156.797	60.7638
20	0.4	ml	3	NaN	5.1501	11.1209	-0.220139	49.6976	54.5468	55.7946	42.6567
30	0.4	ml	3	NaN	4.22923	8.67832	1.26686	40.3514	44.5851	43.4234	36.4585
40	0.4	ml	3	NaN	3.30259	7.31908	2.06062	33.138	36.531	35.0199	30.6423
50	0.4	ml	3	NaN	4.64245	7.62687	3.16858	30.2576	33.0038	31.6851	28.3182
60	0.4	ml	3	NaN	3.32184	6.64746	3.04225	26.695	29.3378	27.7844	25.1482
70	0.4	ml	3	NaN	3.21144	6.12995	3.05538	23.9277	26.0342	24.7681	22.7632
80	0.4	ml	3	NaN	2.22063	5.22011	2.49774	22.8069	24.9433	23.5159	21.7065
90	0.4	ml	3	NaN	2.51073	5.46355	3.01863	21.9954	24.1139	22.6306	20.9926
100	0.4	ml	3	NaN	3.72769	6.37172	4.0526	21.6639	23.5371	22.269	20.695
5	0.5	ml	3	NaN	28.6182	764.602	-3.99241	1022.53	177.121	13611.4	74.2704
10	0.5	ml	3	NaN	14.6371	44.2033	1.24208	128.634	94.9605	254.785	61.2033
20	0.5	ml	3	NaN	6.15892	14.1676	1.28779	56.674	58.3206	65.3093	45.1108
30	0.5	ml	3	NaN	1.93771	7.52604	0.216356	38.5667	42.3342	41.6291	34.4341
40	0.5	ml	3	NaN	3.19742	7.83097	2.11662	37.5243	39.1444	40.0112	32.8903
50	0.5	ml	3	NaN	2.71087	6.69798	2.38909	28.002	30.6767	29.337	26.1597
60	0.5	ml	3	NaN	2.67044	6.30812	2.67079	26.8397	29.4481	27.9485	25.1423
70	0.5	ml	3	NaN	2.46977	6.08226	2.94775	25.2766	27.8857	26.1767	23.9117
80	0.5	ml	3	NaN	3.11252	6.48925	3.71398	24.2088	26.5174	24.9916	23.005
90	0.5	ml	3	NaN	2.5613	5.82801	3.39322	21.425	23.3646	22.0578	20.4716
100	0.5	ml	3	NaN	2.28847	5.53881	3.32491	20.5186	22.376	21.0779	19.6253
5	0.6	ml	3	NaN	22.9406	23996.4	-2.13197	21385.6	170.913	715023	67.7521
10	0.6	ml	3	NaN	11.5769	36448.3	0.21893	132327	97.8854	1.14986e+06	62.5172
20	0.6	ml	3	NaN	5.54086	16.8971	1.9319	64.239	58.9343	78.181	45.2583
30	0.6	ml	3	NaN	3.56476	10.4766	2.51944	40.3289	43.1575	44.1482	34.4512
40	0.6	ml	3	NaN	3.25894	9.02156	3.32846	34.6412	37.9143	36.9024	31.2026
50	0.6	ml	3	NaN	2.91081	8.03999	3.50273	31.2722	33.881	32.9266	28.4894
60	0.6	ml	3	NaN	1.50529	6.07237	2.29803	28.2591	31.1209	29.4644	26.1383
70	0.6	ml	3	NaN	2.66415	7.00853	3.85806	24.9416	27.3177	25.888	23.4641
80	0.6	ml	3	NaN	1.77278	5.97297	3.16529	23.8363	26.0124	24.6388	22.3483
90	0.6	ml	3	NaN	0.154003	4.38882	2.03963	20.7234	23.1547	21.2933	19.8214
100	0.6	ml	3	NaN	1.05728	5.10976	2.94627	20.169	22.3348	20.7203	19.2371
5	0.7	ml	3	NaN	36.5479	18425.9	11.025	17442.9	226.073	474411	73.729
10	0.7	ml	3	NaN	10.3905	4851.34	5.53641	20445.4	108.081	120721	61.5281
20	0.7	ml	3	NaN	-2.0612	21.6567	-0.549537	114.607	52.0439	193.276	39.8697
30	0.7	ml	3	NaN	-1.04111	8.93	1.06837	41.0253	42.3274	45.0595	34.3251
40	0.7	ml	3	NaN	-0.369211	8.10152	2.19107	35.0871	37.0301	37.7048	30.3773
50	0.7	ml	3	NaN	0.408819	7.18156	2.79486	28.3791	31.4183	29.8451	26.1243
60	0.7	ml	3	NaN	-0.35535	5.90797	2.27232	26.8824	29.4284	28.0408	24.7351
70	0.7	ml	3	NaN	1.05504	6.65764	3.43636	25.3458	27.7314	26.3382	23.549
80	0.7	ml	3	NaN	-0.609837	4.8349	2.22479	21.8375	24.4684	22.5284	20.6668
90	0.7	ml	3	NaN	0.822787	5.96637	3.56979	21.2837	23.641	21.9418	20.191
100	0.7	ml	3	NaN	0.517349	5.69002	3.51598	20.549	23.0597	21.1244	19.5883
5	0.8	ml	3	NaN	31.0305	378.071	32.8371	782.367	142.632	6872.15	63.8025
10	0.8	ml	3	NaN	8.32428	3400.97	15.4373	16353	84.5619	92623.2	53.8283
20	0.8	ml	3	NaN	-3.25342	51.4497	4.20039	288.447	53.1846	491.421	40.7968
30	0.8	ml	3	NaN	-1.32593	21.9124	4.7928	97.5745	43.3357	138.736	35.4852
40	0.8	ml	3	NaN	-1.1855	12.4642	5.01418	42.8467	36.3116	48.4744	30.278
50	0.8	ml	3	NaN	-0.908891	8.81962	4.30676	28.9987	31.7956	30.4881	26.8595
60	0.8	ml	3	NaN	-2.06781	7.82826	4.06386	29.2306	29.8337	30.6544	25.7146
70	0.8	ml	3	NaN	-4.016	4.98441	2.04435	23.8956	26.0404	24.7537	22.0313
80	0.8	ml	3	NaN	-1.38027	6.75253	4.27146	22.6563	25.0568	23.3643	21.612
90	0.8	ml	3	NaN	-1.76403	5.68738	3.40336	19.7742	22.3415	20.3737	18.7895
100	0.8	ml	3	NaN	-2.32167	5.54795	3.50782	19.2937	21.291	19.8171	18.305
5	0.9	ml	3	NaN	86.0008	239.147	107.262	248.737	206.653	723.111	124.011
10	0.9	ml	3	NaN	31.1958	193.57	61.6292	475.237	90.62	1265.42	84.3096
20	0.9	ml	3	NaN	1.80344	487.55	30.8223	5319.22	47.5267	12311.3	56.2286
30	0.9	ml	3	NaN	-1.16577	42.9556	21.6431	127.96	37.7652	166.96	45.7451
40	0.9	ml	3	NaN	-2.97508	132.417	17.3698	1755.14	38.4516	2704.27	43.8313
50	0.9	ml	3	NaN	-3.32359	18.838	13.5177	39.044	31.6098	40.7575	36.0734
60	0.9	ml	3	NaN	-3.41662	28.0264	10.1057	309.445	29.8428	403.772	32.8536
70	0.9	ml	3	NaN	-1.92152	15.3398	10.9221	32.8618	28.0994	34.0865	30.4777
80	0.9	ml	3	NaN	-2.51838	12.9979	10.0403	29.0956	26.0819	29.7829	28.1727
90	0.9	ml	3	NaN	-3.16097	10.8569	8.27377	26.1884	23.363	26.7074	25.6425
100	0.9	ml	3	NaN	-2.68446	10.1728	7.7842	24.7819	22.5646	25.2482	24.2569
5	0.1	ml	4	NaN	46.8699	332.903	-8.29667	992.809	313.547	5703.61	112.009
10	0.1	ml	4	NaN	19.5348	39.8822	-2.78281	124.695	113.069	179.666	75.4378
20	0.1	ml	4	NaN	11.5352	20.4656	1.58212	75.9505	71.3452	87.8432	58.303
30	0.1	ml	4	NaN	1.29189	7.39079	-3.97632	51.092	49.5033	55.548	43.6609
40	0.1	ml	4	NaN	2.63873	7.62989	-0.967616	40.8326	40.6264	43.4164	36.5964
50	0.1	ml	4	NaN	4.38918	9.25192	1.62961	41.141	39.7543	43.4276	36.5461
60	0.1	ml	4	NaN	2.50104	6.90205	0.721547	33.2297	32.45	34.7431	30.2011
70	0.1	ml	4	NaN	4.21292	8.496	2.75331	32.2251	31.2602	33.6041	29.2683
80	0.1	ml	4	NaN	3.19122	7.32782	2.27096	30.895	29.8878	32.0333	28.2144
90	0.1	ml	4	NaN	2.85232	6.84693	2.2766	28.304	27.4201	29.2472	26.0408
100	0.1	ml	4	NaN	2.84016	6.7941	2.43822	28.4646	27.3746	29.3221	26.2124
5	0.2	ml	4	NaN	60.0452	860175	-7.04142	217098	503.38	2.69206e+07	142.137
10	0.2	ml	4	NaN	14.0813	33.9579	-6.8957	130.786	108.537	203.096	73.3448
20	0.2	ml	4	NaN	8.11709	17.315	-1.41734	72.506	67.9556	83.9788	55.6731
30	0.2	ml	4	NaN	6.24395	13.073	0.532932	56.9259	53.7502	62.4851	47.0272
40	0.2	ml	4	NaN	5.1378	11.0154	1.39277	46.2444	44.385	49.567	39.9541
50	0.2	ml	4	NaN	5.78827	10.8777	3.12378	39.4903	38.4425	41.8072	35.0636
60	0.2	ml	4	NaN	2.95129	7.83622	1.39393	37.1956	35.2129	38.988	32.9163
70	0.2	ml	4	NaN	0.580221	4.94114	-0.471638	30.8788	30.4301	32.0331	28.3871
80	0.2	ml	4	NaN	3.33976	7.63044	2.49202	32.66	31.63	33.8411	29.8591
90	0.2	ml	4	NaN	2.53661	6.7567	2.09428	30.0652	28.799	31.0624	27.4163
100	0.2	ml	4	NaN	2.12873	6.10382	1.88972	26.3956	25.719	27.1906	24.4332
5	0.3	ml	4	NaN	36.6698	501.048	-14.1115	651.8	222.643	5529.75	90.8078
10	0.3	ml	4	NaN	19.7835	67.6401	-3.79123	265.875	113.156	614.053	73.5178
20	0.3	ml	4	NaN	11.75	23.6578	2.05653	89.7663	78.0462	105.42	64.0512
30	0.3	ml	4	NaN	6.67653	13.7711	0.910795	53.9815	51.5405	59.3945	44.6584
40	0.3	ml	4	NaN	2.7826	8.7524	-0.640854	45.6685	44.0503	48.8035	39.739
50	0.3	ml	4	NaN	5.674	11.1067	3.17681	41.0077	39.9561	43.3891	36.4205
60	0.3	ml	4	NaN	2.28875	7.43763	0.755303	38.975	37.2166	40.8171	34.6154
70	0.3	ml	4	NaN	3.54651	8.30859	2.35774	34.6641	33.0047	36.1609	30.9989
80	0.3	ml	4	NaN	3.22376	7.69467	2.38805	31.7241	30.4197	32.9336	28.7077
90	0.3	ml	4	NaN	1.72705	6.0231	1.42307	28.8627	27.9399	29.8043	26.4478
100	0.3	ml	4	NaN	1.48594	5.75257	1.38648	29.5097	28.2309	30.3756	26.9778
5	0.4	ml	4	NaN	32.7315	175917	-17.8231	66891.4	260.345	4.19209e+06	85.8025
10	0.4	ml	4	NaN	24.1825	95.665	-0.517702	357.448	142.227	706.584	88.4973
20	0.4	ml	4	NaN	6.77546	19.7319	-1.72586	79.9302	68.1025	94.9543	55.8141
30	0.4	ml	4	NaN	5.23746	14.2739	0.183035	61.9971	56.1633	68.6012	49.2198
40	0.4	ml	4	NaN	2.93842	9.76335	0.10598	48.7984	44.5373	52.5603	40.3186
50	0.4	ml	4	NaN	4.95984	10.7997	2.51459	42.921	40.6658	45.487	37.392
60	0.4	ml	4	NaN	3.47497	8.92411	2.14358	37.6268	35.7547	39.5268	33.1584
70	0.4	ml	4	NaN	2.87414	7.6987	1.89215	33.083	31.7217	34.4944	29.7331
80	0.4	ml	4	NaN	1.88167	6.66858	1.41112	32.4673	30.6876	33.685	29.1064
90	0.4	ml	4	NaN	1.65784	6.22961	1.51724	30.3747	29.0896	31.389	27.5339
100	0.4	ml	4	NaN	2.28458	6.69645	2.32264	28.732	27.6566	29.6204	26.2748
5	0.5	ml	4	NaN	47.7545	58041.4	-9.51102	31406.7	272.747	1.43017e+06	96.1754
10	0.5	ml	4	NaN	25.0824	209.952	0.963049	762.633	132.677	2609.88	83.7443
20	0.5	ml	4	NaN	10.001	42.0739	1.17807	276.335	77.5937	419.48	63.6718
30	0.5	ml	4	NaN	2.73126	12.3907	-1.39435	57.8687	52.3206	64.1662	45.6623
40	0.5	ml	4	NaN	4.77673	13.9031	2.15376	65.1668	49.7831	71.5239	46.0763
50	0.5	ml	4	NaN	2.93039	9.77254	1.3065	42.8321	37.7499	45.7607	34.8361
60	0.5	ml	4	NaN	2.12188	8.25467	1.14242	39.0944	35.8956	41.1581	33.5025
70	0.5	ml	4	NaN	3.361	9.28627	2.81886	37.8182	34.6159	39.5844	32.6993
80	0.5	ml	4	NaN	2.91308	8.07115	2.68708	33.5666	32.0221	34.8642	30.1155
90	0.5	ml	4	NaN	2.87294	7.72125	2.83444	30.1555	28.6421	31.2375	27.1507
100	0.5	ml	4	NaN	2.19934	6.9057	2.45711	28.5845	27.1378	29.5112	25.83
5	0.6	ml	4	NaN	46.108	3.21157e+07	-7.46184	5.28427e+06	345.553	9.82332e+08	102.735
10	0.6	ml	4	NaN	20.9283	1.45198e+08	-0.719905	1.86773e+08	141.632	4589235937	88.4135
20	0.6	ml	4	NaN	9.89581	44.9127	2.26792	254.148	76.5764	385.121	62.3471
30	0.6	ml	4	NaN	6.55719	21.2603	3.03659	81.6189	55.952	94.0637	49.6121
40	0.6	ml	4	NaN	5.01155	14.6749	2.8811	54.5512	47.6796	59.3392	42.9766
50	0.6	ml	4	NaN	4.91779	13.4704	3.84326	50.3955	43.4692	53.9285	40.4204
60	0.6	ml	4	NaN	2.45386	9.98586	2.0702	44.2663	38.545	46.7973	36.2879
70	0.6	ml	4	NaN	3.66057	10.0139	3.55268	37.0776	34.152	38.857	32.0155
80	0.6	ml	4	NaN	2.95616	9.27431	3.26704	36.1205	32.472	37.6981	30.797
90	0.6	ml	4	NaN	0.654548	6.09328	1.21905	29.7593	28.2335	30.8129	26.5324
100	0.6	ml	4	NaN	1.93861	7.36657	2.68082	30.2965	28.1624	31.3259	26.8326
5	0.7	ml	4	NaN	73.5877	2.28166e+07	5.63481	4.26622e+06	442.254	643455738	105.729
10	0.7	ml	4	NaN	24.1925	1010493071	4.22637	1069130727	177.694	31219949044	87.5258
20	0.7	ml	4	NaN	0.868691	321.712	-2.59213	2598.82	69.3409	6126.45	56.2536
30	0.7	ml	4	NaN	1.48637	18.7867	-0.019446	84.9091	54.5969	100.008	47.8617
40	0.7	ml	4	NaN	1.66787	14.2882	1.40932	61.4986	47.671	67.8799	43.2241
50	0.7	ml	4	NaN	1.92944	11.8332	2.04135	44.7335	38.9278	48.0527	35.5534
60	0.7	ml	4	NaN	0.121165	8.97083	0.843131	43.8985	36.8691	46.5965	34.5076
70	0.7	ml	4	NaN	1.31777	9.4659	2.2414	40.1443	34.4223	42.246	32.6181
80	0.7	ml	4	NaN	0.367599	7.12601	1.36283	33.2814	30.347	34.7063	28.4922
90	0.7	ml	4	NaN	1.37333	7.75872	2.56932	31.7054	29.4989	32.9187	27.7396
100	0.7	ml	4	NaN	1.59659	7.91833	2.97353	30.8549	28.4924	31.9546	26.9456
5	0.8	ml	4	NaN	54.0349	28612.1	24.6195	26075.5	239.111	724062	75.3632
10	0.8	ml	4	NaN	17.9958	16747.7	11.594	61411.3	131.885	429988	78.4817
20	0.8	ml	4	NaN	-0.33286	8343.02	1.4333	74050.9	70.7944	219526	56.2802
30	0.8	ml	4	NaN	1.08529	272.991	3.06669	3171.09	55.1845	5798.17	48.665
40	0.8	ml	4	NaN	1.03043	19.2261	3.82621	65.2015	46.099	73.259	41.674
50	0.8	ml	4	NaN	0.654035	14.1535	3.00655	50.5129	40.0139	55.2021	36.0519
60	0.8	ml	4	NaN	0.389238	12.762	3.48167	52.4944	38.4372	56.1955	36.8333
70	0.8	ml	4	NaN	-2.40062	8.50397	0.550802	48.2666	32.9781	51.6774	31.0787
80	0.8	ml	4	NaN	-1.00352	7.50178	1.69762	34.4872	31.98	35.9681	29.5393
90	0.8	ml	4	NaN	-0.535119	7.56135	2.03223	30.4882	27.5234	31.7797	25.6162
100	0.8	ml	4	NaN	-2.04814	6.25895	1.02811	30.5854	26.0289	31.8152	24.3593
5	0.9	ml	4	NaN	141.056	1273.17	112.019	1378.8	370.274	8731.76	150.855
10	0.9	ml	4	NaN	48.1465	5623.41	59.4241	14995.7	139.153	70037.2	97.9823
20	0.9	ml	4	NaN	6.85989	378543	26.9185	3.04254e+06	64.6808	1.11406e+07	61.5539
30	0.9	ml	4	NaN	0.690065	2418637132	17.1867	20306785721	49.2885	75055720431	50.0119
40	0.9	ml	4	NaN	-0.690188	599.343	14.5429	7206.35	49.022	11396.7	50.0864
50	0.9	ml	4	NaN	-2.18121	25.6848	10.1564	71.5517	39.9755	81.4842	40.0323
60	0.9	ml	4	NaN	-3.22355	20764.4	6.1579	438463	37.0148	655278	36.5332
70	0.9	ml	4	NaN	-1.13667	23.6562	8.49549	89.0952	35.9126	101.378	36.3283
80	0.9	ml	4	NaN	-1.67469	15.5416	7.4259	39.7565	31.4426	41.9688	30.8166
90	0.9	ml	4	NaN	-2.19248	12.6694	5.79011	35.293	29.042	36.9831	28.4084
100	0.9	ml	4	NaN	-1.79611	12.6925	5.43519	37.2986	28.1417	39.1169	27.6271
5	0.1	ml	5	NaN	72.59	1987.12	-11.6599	4429.11	486.966	42704.1	141.099
10	0.1	ml	5	NaN	29.8737	73.8288	-3.20995	220.446	147.32	362.333	93.1589
20	0.1	ml	5	NaN	17.0911	32.9794	1.57476	111.241	89.1551	133.118	72.7637
30	0.1	ml	5	NaN	3.84586	13.1403	-5.05887	69.6663	59.0632	77.4627	53.1202
40	0.1	ml	5	NaN	3.0686	9.91834	-3.45051	50.8225	46.2398	54.7191	42.5405
50	0.1	ml	5	NaN	4.9562	11.9576	-0.20837	51.8987	45.2022	55.3255	42.7343
60	0.1	ml	5	NaN	2.5165	8.16366	-1.61704	40.5086	36.2751	42.6609	34.7335
70	0.1	ml	5	NaN	4.42006	10.3201	0.98094	40.9301	36.1756	42.9276	34.8985
80	0.1	ml	5	NaN	4.02186	9.7181	1.15226	40.1041	35.0265	41.8282	34.2275
90	0.1	ml	5	NaN	2.97121	8.19819	0.520104	36.2066	31.8189	37.579	31.3084
100	0.1	ml	5	NaN	3.4042	8.79673	1.32048	35.5328	30.9271	36.7936	30.6488
5	0.2	ml	5	NaN	101.954	1.2332e+08	-7.31002	9.21226e+06	1037.91	3895162416	210.544
10	0.2	ml	5	NaN	24.5613	97.183	-7.74923	476.092	155.499	971.432	96.8493
20	0.2	ml	5	NaN	12.7005	30.2947	-1.83849	130.271	89.8335	159.465	74.6908
30	0.2	ml	5	NaN	7.71709	18.8403	-1.47342	79.8234	62.5761	90.0232	56.0666
40	0.2	ml	5	NaN	7.25288	16.1737	0.596391	61.7103	52.8484	67.0134	48.7553
50	0.2	ml	5	NaN	7.36852	15.0164	2.17903	52.2702	45.0351	55.9594	42.3253
60	0.2	ml	5	NaN	3.10214	9.74837	-0.786295	48.8825	40.4477	51.7078	39.2617
70	0.2	ml	5	NaN	1.05034	6.89695	-2.13944	38.591	34.1012	40.3713	33.1083
80	0.2	ml	5	NaN	3.9535	9.76986	1.16826	41.2273	36.2118	42.965	35.3614
90	0.2	ml	5	NaN	2.09874	7.52789	-0.209872	36.9356	32.1185	38.3205	31.7195
100	0.2	ml	5	NaN	1.73844	6.73938	-0.310285	32.3131	28.8956	33.4021	28.4177
5	0.3	ml	5	NaN	51.498	2885.66	-19.1946	2487.17	298.598	46255.7	107.663
10	0.3	ml	5	NaN	29.3139	195.134	-4.85641	939.759	147.403	2874.51	90.6831
20	0.3	ml	5	NaN	14.5748	35.1521	-0.0310515	125.236	90.4719	152.306	74.7618
30	0.3	ml	5	NaN	9.68201	21.548	0.397761	74.9363	61.7523	84.2061	54.7046
40	0.3	ml	5	NaN	2.67642	11.394	-3.43267	58.3763	49.3833	63.3053	46.0479
50	0.3	ml	5	NaN	7.02333	15.1011	2.06984	53.9686	46.1248	57.7807	43.4259
60	0.3	ml	5	NaN	3.42686	10.9786	-0.22432	51.8014	43.2624	54.7671	42.0338
70	0.3	ml	5	NaN	3.96064	10.7457	0.81845	45.1931	38.3831	47.451	37.4665
80	0.3	ml	5	NaN	2.79979	8.8508	0.147912	39.3829	33.8982	41.097	33.2818
90	0.3	ml	5	NaN	2.11501	7.6759	-0.106592	35.9833	31.449	37.3572	30.9631
100	0.3	ml	5	NaN	2.76369	8.74195	0.981023	39.2568	33.2389	40.6426	33.2513
5	0.4	ml	5	NaN	60.5781	778421	-19.5907	194611	418.824	1.87687e+07	101.606
10	0.4	ml	5	NaN	34.4786	285.669	-1.5368	1177.18	176	3034.44	104.859
20	0.4	ml	5	NaN	9.72982	35.7994	-3.58353	132.577	79.0018	168.925	65.6152
30	0.4	ml	5	NaN	5.81131	19.4048	-2.48448	79.8723	63.1859	89.9671	56.7622
40	0.4	ml	5	NaN	5.67935	17.375	-0.0719227	82.5785	55.4589	91.6623	52.6511
50	0.4	ml	5	NaN	4.75456	13.4726	0.0743436	55.5821	46.4533	59.4902	44.2551
60	0.4	ml	5	NaN	4.37468	12.3403	0.815468	50.5368	41.5466	53.6023	40.2514
70	0.4	ml	5	NaN	3.92962	10.8691	0.910841	44.5594	37.0901	46.8731	36.2699
80	0.4	ml	5	NaN	2.54703	9.25061	0.186146	43.7502	36.1018	45.6963	35.8862
90	0.4	ml	5	NaN	2.33738	8.42398	0.312066	40.5238	34.2312	42.0908	34.0817
100	0.4	ml	5	NaN	1.7956	7.43127	0.0483987	36.2233	31.3343	37.4723	31.1259
5	0.5	ml	5	NaN	76.5175	2000186811	-13.5962	1.11577e+08	437.038	61942124210	118.599
10	0.5	ml	5	NaN	32.0257	4955.99	-2.52675	21035	169.547	110623	101.713
20	0.5	ml	5	NaN	15.2602	118.719	1.44161	1187.08	97.0667	2061.36	80.5554
30	0.5	ml	5	NaN	7.2614	28.0172	-0.30779	124.066	66.8165	146.346	61.5353
40	0.5	ml	5	NaN	6.25204	20.2077	0.820901	88.1648	56.2095	98.345	53.7707
50	0.5	ml	5	NaN	4.30842	14.2268	0.107827	58.9661	43.1366	64.0308	41.221
60	0.5	ml	5	NaN	2.93344	12.4292	-0.127432	56.0733	41.4838	59.8114	41.0612
70	0.5	ml	5	NaN	4.46334	13.0822	1.95129	49.9395	39.4067	52.6895	39.0561
80	0.5	ml	5	NaN	3.72852	10.9177	1.55144	42.8281	36.1037	44.7881	35.4755
90	0.5	ml	5	NaN	2.42372	8.80414	0.516294	38.2506	32.1269	39.8186	31.7787
100	0.5	ml	5	NaN	2.67988	9.03901	1.1704	36.9849	31.0515	38.373	30.9796
5	0.6	ml	5	NaN	69.0178	25818700806	-14.1408	8.97556e+08	618.318	791699000000	146.074
10	0.6	ml	5	NaN	34.2434	289755000000	-0.403276	147738000000	193.218	9153670000000	115.322
20	0.6	ml	5	NaN	12.0465	117.379	-0.300558	1110.86	87.8216	1957.65	72.6895
30	0.6	ml	5	NaN	6.85293	31.8241	-0.0101652	125.108	63.0092	149.903	57.6692
40	0.6	ml	5	NaN	6.01808	22.985	1.32585	89.7343	56.364	100.677	53.4743
50	0.6	ml	5	NaN	6.12864	20.0569	2.8752	75.9027	51.5177	82.4138	50.7125
60	0.6	ml	5	NaN	3.33526	14.3862	0.88118	60.7934	45.5198	64.7719	45.0073
70	0.6	ml	5	NaN	3.71563	12.9328	1.63002	50.7738	39.0826	53.677	38.6537
80	0.6	ml	5	NaN	3.65773	13.2383	2.15734	52.8483	37.0838	55.725	37.6094
90	0.6	ml	5	NaN	2.25984	9.93498	0.872235	42.1978	33.1466	44.0499	33.3261
100	0.6	ml	5	NaN	2.77171	10.1608	1.6978	41.3746	32.6152	43.0138	33.0136
5	0.7	ml	5	NaN	119.021	16369888652	2.27627	6.75338e+08	745.508	468672000000	137.879
10	0.7	ml	5	NaN	38.9728	4902580000000	4.05107	1883760000000	232.856	152427000000000	121.313
20	0.7	ml	5	NaN	2.63714	9007.02	-6.20464	55717	81.5117	165610	67.7912
30	0.7	ml	5	NaN	3.84656	44.0732	-1.46948	215.091	64.1287	276.536	58.884
40	0.7	ml	5	NaN	4.88475	28.6344	1.64474	119.646	58.1031	137.464	56.3487
50	0.7	ml	5	NaN	3.53155	18.6053	1.05913	66.3064	45.5627	72.2495	44.2404
60	0.7	ml	5	NaN	1.94965	16.3551	0.478365	68.8788	43.6799	74.1529	44.1274
70	0.7	ml	5	NaN	2.09643	13.932	0.974789	57.4425	40.0085	60.9981	40.3421
80	0.7	ml	5	NaN	1.65067	11.5683	0.716341	49.9512	36.2761	52.6223	36.3882
90	0.7	ml	5	NaN	1.59576	10.6021	0.898808	44.0494	33.769	46.0579	34.0265
100	0.7	ml	5	NaN	2.32286	11.2149	1.94281	42.6999	33.2051	44.4598	33.5467
5	0.8	ml	5	NaN	79.6371	2.08748e+06	16.0565	691888	367.511	5.37465e+07	86.9504
10	0.8	ml	5	NaN	32.5097	1.54414e+06	9.56136	3.45972e+06	190.252	4.39482e+07	111.021
20	0.8	ml	5	NaN	3.99052	906053	-0.756609	6.56879e+06	89.6363	2.70253e+07	73.5377
30	0.8	ml	5	NaN	3.38262	8016.8	1.30154	102627	64.1714	226563	58.5473
40	0.8	ml	5	NaN	3.59772	38.3527	3.05152	181.001	57.983	218.942	56.0746
50	0.8	ml	5	NaN	2.00893	23.9626	1.49364	91.0714	46.1465	102.771	43.9801
60	0.8	ml	5	NaN	1.78258	21.7894	2.08295	99.9185	43.9697	109.531	45.1426
70	0.8	ml	5	NaN	-0.712268	24.2847	-0.26053	234.336	38.3759	267.246	39.647
80	0.8	ml	5	NaN	-0.0144906	12.0495	0.230921	52.5972	37.2412	55.6302	36.9903
90	0.8	ml	5	NaN	0.51499	11.3202	0.851282	43.9194	32.0993	46.106	32.1842
100	0.8	ml	5	NaN	-1.4543	9.90035	-0.667441	49.3613	29.5284	52.0592	29.7139
5	0.9	ml	5	NaN	217.844	58932	110.052	40461.3	632.094	965324	172.125
10	0.9	ml	5	NaN	59.9938	91762.8	52.6798	213282	188.484	1.54289e+06	114.431
20	0.9	ml	5	NaN	10.5215	2.43212e+08	22.0022	1302527033	79.4474	7232941996	68.5595
30	0.9	ml	5	NaN	2.18587	726984	11.8725	8.54896e+06	58.891	2.24052e+07	55.2534
40	0.9	ml	5	NaN	-0.179119	6742.76	8.81685	118925	55.0307	200395	53.9255
50	0.9	ml	5	NaN	-0.713623	59.3559	6.90301	322.818	47.0364	411.834	47.1042
60	0.9	ml	5	NaN	-3.28576	182.105	2.89599	2265.51	42.0472	2870.55	41.7101
70	0.9	ml	5	NaN	-0.204113	61.4666	6.33889	526.518	42.5758	643.533	44.0899
80	0.9	ml	5	NaN	-1.39553	23.4783	4.23302	83.0159	35.4818	90.1823	35.193
90	0.9	ml	5	NaN	-2.53303	17.3006	2.21346	59.6256	33.7372	63.3864	33.8255
100	0.9	ml	5	NaN	-1.45952	19.7263	2.92527	74.506	32.2746	80.0146	32.3135
5	0.1	km	2	4.13377	NaN	NaN	NaN	53.5013	NaN	NaN	NaN
10	0.1	km	2	1.88859	NaN	NaN	NaN	35.6044	NaN	NaN	NaN
20	0.1	km	2	2.19767	28.1461	NaN	NaN	26.5005	64.7311	NaN	NaN
30	0.1	km	2	-0.823205	19.6812	NaN	NaN	21.1753	47.0987	NaN	NaN
40	0.1	km	2	0.92576	11.5974	NaN	NaN	17.7271	33.7738	NaN	NaN
50	0.1	km	2	0.637837	10.5833	NaN	NaN	16.8303	30.6441	NaN	NaN
60	0.1	km	2	0.357726	8.07917	NaN	NaN	14.6509	26.0221	NaN	NaN
70	0.1	km	2	0.793515	8.40327	NaN	NaN	13.7656	24.6286	NaN	NaN
80	0.1	km	2	0.910995	5.55705	NaN	NaN	12.7925	21.2453	NaN	NaN
90	0.1	km	2	0.500056	5.40115	NaN	NaN	12.109	20.2765	NaN	NaN
100	0.1	km	2	0.161211	4.62897	NaN	NaN	11.9255	19.6554	NaN	NaN
5	0.2	km	2	9.07935	NaN	NaN	NaN	59.8974	NaN	NaN	NaN
10	0.2	km	2	3.75193	NaN	NaN	NaN	37.3576	NaN	NaN	NaN
20	0.2	km	2	2.0563	27.4825	NaN	NaN	26.5822	65.8734	NaN	NaN
30	0.2	km	2	1.62196	20.8429	NaN	NaN	21.5388	46.8501	NaN	NaN
40	0.2	km	2	1.16326	13.1656	NaN	NaN	18.0623	36.9412	NaN	NaN
50	0.2	km	2	2.26352	10.451	NaN	NaN	16.3524	29.0162	NaN	NaN
60	0.2	km	2	2.18169	7.83391	NaN	NaN	15.0031	26.3471	NaN	NaN
70	0.2	km	2	0.697943	5.85693	NaN	NaN	13.3104	22.6807	NaN	NaN
80	0.2	km	2	1.69649	4.56149	NaN	NaN	13.1833	22.2915	NaN	NaN
90	0.2	km	2	1.83068	4.89481	NaN	NaN	12.26	19.6293	NaN	NaN
100	0.2	km	2	1.16058	3.33442	NaN	NaN	11.5821	17.6622	NaN	NaN
5	0.3	km	2	16.2132	NaN	NaN	NaN	58.5691	NaN	NaN	NaN
10	0.3	km	2	7.5569	NaN	NaN	NaN	36.3616	NaN	NaN	NaN
20	0.3	km	2	6.66249	26.716	NaN	NaN	26.4866	60.9884	NaN	NaN
30	0.3	km	2	4.12494	21.4163	NaN	NaN	19.8191	46.3252	NaN	NaN
40	0.3	km	2	3.52645	11.4901	NaN	NaN	18.5537	36.9479	NaN	NaN
50	0.3	km	2	4.88849	11.6406	NaN	NaN	16.7698	30.7528	NaN	NaN
60	0.3	km	2	2.97961	6.33858	NaN	NaN	14.722	26.0872	NaN	NaN
70	0.3	km	2	3.87954	6.9568	NaN	NaN	14.1231	23.2785	NaN	NaN
80	0.3	km	2	3.89338	6.14293	NaN	NaN	13.3008	21.8521	NaN	NaN
90	0.3	km	2	3.82406	4.48703	NaN	NaN	12.4771	18.9972	NaN	NaN
100	0.3	km	2	3.37117	3.79286	NaN	NaN	11.9066	19.213	NaN	NaN
5	0.4	km	2	24.7838	NaN	NaN	NaN	63.9427	NaN	NaN	NaN
10	0.4	km	2	17.4151	NaN	NaN	NaN	42.2748	NaN	NaN	NaN
20	0.4	km	2	10.2201	25.1744	NaN	NaN	26.7992	65.215	NaN	NaN
30	0.4	km	2	8.88397	21.4205	NaN	NaN	22.3062	47.0454	NaN	NaN
40	0.4	km	2	8.6438	9.76268	NaN	NaN	19.4122	33.703	NaN	NaN
50	0.4	km	2	9.28582	11.5394	NaN	NaN	18.2892	29.169	NaN	NaN
60	0.4	km	2	8.68994	7.51715	NaN	NaN	16.5952	26.2191	NaN	NaN
70	0.4	km	2	8.83376	7.70789	NaN	NaN	15.8361	23.5478	NaN	NaN
80	0.4	km	2	8.17284	4.82017	NaN	NaN	14.5742	21.308	NaN	NaN
90	0.4	km	2	8.41085	5.17289	NaN	NaN	14.399	20.7761	NaN	NaN
100	0.4	km	2	8.4521	5.11756	NaN	NaN	13.9542	19.5775	NaN	NaN
5	0.5	km	2	47.0585	NaN	NaN	NaN	83.4135	NaN	NaN	NaN
10	0.5	km	2	29.2542	NaN	NaN	NaN	48.4652	NaN	NaN	NaN
20	0.5	km	2	20.9924	27.1502	NaN	NaN	33.1107	63.403	NaN	NaN
30	0.5	km	2	18.3904	20.5173	NaN	NaN	27.1242	45.7466	NaN	NaN
40	0.5	km	2	18.3278	13.5945	NaN	NaN	25.3142	36.0588	NaN	NaN
50	0.5	km	2	18.4544	11.4949	NaN	NaN	23.8398	28.9669	NaN	NaN
60	0.5	km	2	17.4582	8.6024	NaN	NaN	22.0847	27.9027	NaN	NaN
70	0.5	km	2	16.9331	7.26496	NaN	NaN	21.1504	23.6476	NaN	NaN
80	0.5	km	2	17.0208	6.43731	NaN	NaN	21.1382	22.7744	NaN	NaN
90	0.5	km	2	17.2743	6.16989	NaN	NaN	20.5135	20.1942	NaN	NaN
100	0.5	km	2	16.7172	4.8075	NaN	NaN	19.8151	18.6948	NaN	NaN
5	0.6	km	2	75.8725	NaN	NaN	NaN	113.493	NaN	NaN	NaN
10	0.6	km	2	55.0492	NaN	NaN	NaN	80.6604	NaN	NaN	NaN
20	0.6	km	2	37.6983	28.7393	NaN	NaN	45.1604	64.3577	NaN	NaN
30	0.6	km	2	34.1836	22.1013	NaN	NaN	39.1582	49.903	NaN	NaN
40	0.6	km	2	33.1295	12.8195	NaN	NaN	36.8796	36.5167	NaN	NaN
50	0.6	km	2	32.2181	11.2944	NaN	NaN	35.3268	30.1853	NaN	NaN
60	0.6	km	2	31.1162	7.05631	NaN	NaN	33.9333	26.9184	NaN	NaN
70	0.6	km	2	31.4236	7.95934	NaN	NaN	33.7457	23.9658	NaN	NaN
80	0.6	km	2	30.6864	6.62445	NaN	NaN	32.7364	22.8387	NaN	NaN
90	0.6	km	2	29.806	4.7161	NaN	NaN	31.5798	19.6418	NaN	NaN
100	0.6	km	2	30.2479	4.43132	NaN	NaN	31.8416	18.298	NaN	NaN
5	0.7	km	2	111.141	NaN	NaN	NaN	156.937	NaN	NaN	NaN
10	0.7	km	2	85.2403	NaN	NaN	NaN	109.233	NaN	NaN	NaN
20	0.7	km	2	63.9354	25.921	NaN	NaN	71.4712	62.3374	NaN	NaN
30	0.7	km	2	58.1706	22.711	NaN	NaN	61.7319	48.3383	NaN	NaN
40	0.7	km	2	56.0044	12.8184	NaN	NaN	58.464	36.7948	NaN	NaN
50	0.7	km	2	54.5159	11.2131	NaN	NaN	56.2122	29.683	NaN	NaN
60	0.7	km	2	53.2076	8.15125	NaN	NaN	54.7634	26.268	NaN	NaN
70	0.7	km	2	53.054	8.23996	NaN	NaN	54.3044	23.7278	NaN	NaN
80	0.7	km	2	52.0851	5.85929	NaN	NaN	53.1719	21.7549	NaN	NaN
90	0.7	km	2	52.0749	6.16657	NaN	NaN	52.9712	20.2094	NaN	NaN
100	0.7	km	2	51.7586	5.24821	NaN	NaN	52.663	19.6765	NaN	NaN
5	0.8	km	2	155.233	NaN	NaN	NaN	185.733	NaN	NaN	NaN
10	0.8	km	2	142.515	NaN	NaN	NaN	174.778	NaN	NaN	NaN
20	0.8	km	2	111.836	25.2963	NaN	NaN	122.985	63.0398	NaN	NaN
30	0.8	km	2	102.828	23.3869	NaN	NaN	108.074	48.7287	NaN	NaN
40	0.8	km	2	95.7831	13.0263	NaN	NaN	98.1359	35.0816	NaN	NaN
50	0.8	km	2	92.5973	11.8675	NaN	NaN	93.8687	29.4104	NaN	NaN
60	0.8	km	2	90.2794	7.97538	NaN	NaN	91.2616	27.4406	NaN	NaN
70	0.8	km	2	88.2692	5.27365	NaN	NaN	89.0891	21.791	NaN	NaN
80	0.8	km	2	88.0828	5.56737	NaN	NaN	88.7938	21.6933	NaN	NaN
90	0.8	km	2	87.1746	4.75747	NaN	NaN	87.7301	19.2204	NaN	NaN
100	0.8	km	2	86.3426	3.91625	NaN	NaN	86.8035	18.48	NaN	NaN
5	0.9	km	2	259.993	NaN	NaN	NaN	293.504	NaN	NaN	NaN
10	0.9	km	2	238.642	NaN	NaN	NaN	264.803	NaN	NaN	NaN
20	0.9	km	2	214.465	33.5436	NaN	NaN	236.21	63.2664	NaN	NaN
30	0.9	km	2	194.919	25.2805	NaN	NaN	204.739	45.0498	NaN	NaN
40	0.9	km	2	187.902	12.7852	NaN	NaN	200.577	35.3885	NaN	NaN
50	0.9	km	2	175.772	10.9046	NaN	NaN	180.51	28.4517	NaN	NaN
60	0.9	km	2	171.919	7.49383	NaN	NaN	177.052	25.2719	NaN	NaN
70	0.9	km	2	166.852	7.72435	NaN	NaN	168.919	24.2583	NaN	NaN
80	0.9	km	2	164.41	5.92484	NaN	NaN	165.821	21.6828	NaN	NaN
90	0.9	km	2	162.331	5.20443	NaN	NaN	163.378	19.2202	NaN	NaN
100	0.9	km	2	160.328	4.53002	NaN	NaN	161.074	18.6868	NaN	NaN
5	0.1	km	3	4.20461	NaN	NaN	NaN	89.2577	NaN	NaN	NaN
10	0.1	km	3	2.63238	NaN	NaN	NaN	61.2186	NaN	NaN	NaN
20	0.1	km	3	2.58587	61.7077	NaN	NaN	43.6629	138.454	NaN	NaN
30	0.1	km	3	-2.13578	43.0534	NaN	NaN	36.9928	106.367	NaN	NaN
40	0.1	km	3	0.264114	21.4358	NaN	NaN	29.7917	57.4665	NaN	NaN
50	0.1	km	3	0.66078	21.1017	NaN	NaN	29.1246	55.7417	NaN	NaN
60	0.1	km	3	-0.489349	13.5839	NaN	NaN	23.6795	42.1539	NaN	NaN
70	0.1	km	3	1.07761	15.2073	NaN	NaN	23.0696	41.921	NaN	NaN
80	0.1	km	3	0.0832461	10.0597	NaN	NaN	21.2414	35.5865	NaN	NaN
90	0.1	km	3	0.455013	9.92408	NaN	NaN	21.5753	34.3534	NaN	NaN
100	0.1	km	3	-0.152365	7.77459	NaN	NaN	19.8461	31.3073	NaN	NaN
5	0.2	km	3	9.90016	NaN	NaN	NaN	97.3038	NaN	NaN	NaN
10	0.2	km	3	1.11051	NaN	NaN	NaN	59.3112	NaN	NaN	NaN
20	0.2	km	3	1.29732	57.6286	NaN	NaN	43.9705	146.005	NaN	NaN
30	0.2	km	3	0.901789	45.7281	NaN	NaN	37.0345	104.451	NaN	NaN
40	0.2	km	3	1.33666	27.0086	NaN	NaN	30.1167	69.5837	NaN	NaN
50	0.2	km	3	1.96709	21.328	NaN	NaN	27.0325	52.8244	NaN	NaN
60	0.2	km	3	2.03622	15.4674	NaN	NaN	25.7228	46.3569	NaN	NaN
70	0.2	km	3	-0.0639305	11.2599	NaN	NaN	23.3005	38.4223	NaN	NaN
80	0.2	km	3	2.00525	9.54365	NaN	NaN	23.5225	37.7979	NaN	NaN
90	0.2	km	3	1.2987	8.84355	NaN	NaN	21.0577	32.789	NaN	NaN
100	0.2	km	3	1.06435	7.24027	NaN	NaN	19.1684	29.1486	NaN	NaN
5	0.3	km	3	11.6293	NaN	NaN	NaN	86.7715	NaN	NaN	NaN
10	0.3	km	3	6.27829	NaN	NaN	NaN	58.5766	NaN	NaN	NaN
20	0.3	km	3	4.68534	55.9136	NaN	NaN	42.6153	128.22	NaN	NaN
30	0.3	km	3	3.2869	47.4927	NaN	NaN	33.6161	98.5068	NaN	NaN
40	0.3	km	3	1.44429	22.4394	NaN	NaN	30.7832	68.858	NaN	NaN
50	0.3	km	3	4.72739	22.5578	NaN	NaN	29.2332	54.6056	NaN	NaN
60	0.3	km	3	1.2325	11.8467	NaN	NaN	25.0205	44.7052	NaN	NaN
70	0.3	km	3	2.69916	12.9903	NaN	NaN	23.7858	39.7068	NaN	NaN
80	0.3	km	3	3.38694	10.9741	NaN	NaN	22.448	36.6863	NaN	NaN
90	0.3	km	3	2.35929	7.97943	NaN	NaN	20.7177	31.2632	NaN	NaN
100	0.3	km	3	1.9533	7.15455	NaN	NaN	19.7097	31.889	NaN	NaN
5	0.4	km	3	19.6558	NaN	NaN	NaN	95.6033	NaN	NaN	NaN
10	0.4	km	3	14.9895	NaN	NaN	NaN	65.5149	NaN	NaN	NaN
20	0.4	km	3	7.16384	55.342	NaN	NaN	44.3407	153.093	NaN	NaN
30	0.4	km	3	6.59516	45.5301	NaN	NaN	35.378	98.0571	NaN	NaN
40	0.4	km	3	6.3182	20.607	NaN	NaN	30.1739	62.4726	NaN	NaN
50	0.4	km	3	8.05562	22.9214	NaN	NaN	28.5133	53.5328	NaN	NaN
60	0.4	km	3	7.27482	14.8796	NaN	NaN	26.3447	45.099	NaN	NaN
70	0.4	km	3	6.86249	14.4898	NaN	NaN	22.6971	40.5105	NaN	NaN
80	0.4	km	3	5.71111	9.10426	NaN	NaN	21.2524	35.7065	NaN	NaN
90	0.4	km	3	6.68747	10.1431	NaN	NaN	21.6243	34.7561	NaN	NaN
100	0.4	km	3	7.02695	8.90252	NaN	NaN	20.5588	32.5768	NaN	NaN
5	0.5	km	3	47.4646	NaN	NaN	NaN	135.486	NaN	NaN	NaN
10	0.5	km	3	27.1594	NaN	NaN	NaN	74.5046	NaN	NaN	NaN
20	0.5	km	3	16.2304	59.1319	NaN	NaN	45.506	138.301	NaN	NaN
30	0.5	km	3	12.6573	43.0897	NaN	NaN	35.6172	93.6172	NaN	NaN
40	0.5	km	3	13.3956	24.0774	NaN	NaN	33.5285	63.5205	NaN	NaN
50	0.5	km	3	13.1919	21.0459	NaN	NaN	28.3926	50.5052	NaN	NaN
60	0.5	km	3	13.3628	16.2262	NaN	NaN	28.0846	49.5214	NaN	NaN
70	0.5	km	3	12.8942	14.0415	NaN	NaN	26.422	40.942	NaN	NaN
80	0.5	km	3	13.3853	11.9225	NaN	NaN	26.0025	37.9163	NaN	NaN
90	0.5	km	3	13.1066	10.1718	NaN	NaN	23.9362	33.5304	NaN	NaN
100	0.5	km	3	12.9652	9.20665	NaN	NaN	23.0787	30.461	NaN	NaN
5	0.6	km	3	79.5423	NaN	NaN	NaN	194.57	NaN	NaN	NaN
10	0.6	km	3	48.693	NaN	NaN	NaN	112.626	NaN	NaN	NaN
20	0.6	km	3	30.7386	61.557	NaN	NaN	52.3945	138.825	NaN	NaN
30	0.6	km	3	27.2969	50.4697	NaN	NaN	47.0679	122.224	NaN	NaN
40	0.6	km	3	26.2577	26.933	NaN	NaN	39.9183	69.3411	NaN	NaN
50	0.6	km	3	24.9866	21.9942	NaN	NaN	36.0953	54.2081	NaN	NaN
60	0.6	km	3	23.7534	14.0749	NaN	NaN	33.9808	46.7073	NaN	NaN
70	0.6	km	3	24.8044	14.7213	NaN	NaN	33.3569	41.0678	NaN	NaN
80	0.6	km	3	23.5616	12.307	NaN	NaN	31.603	38.9843	NaN	NaN
90	0.6	km	3	22.6016	8.70594	NaN	NaN	29.9557	32.5489	NaN	NaN
100	0.6	km	3	22.9658	7.60497	NaN	NaN	29.7948	30.2511	NaN	NaN
5	0.7	km	3	134.23	NaN	NaN	NaN	294.235	NaN	NaN	NaN
10	0.7	km	3	85.7596	NaN	NaN	NaN	158.527	NaN	NaN	NaN
20	0.7	km	3	55.8869	52.5951	NaN	NaN	80.1288	136.822	NaN	NaN
30	0.7	km	3	48.9197	47.5689	NaN	NaN	60.6785	103.315	NaN	NaN
40	0.7	km	3	45.7478	24.4389	NaN	NaN	55.2369	67.5335	NaN	NaN
50	0.7	km	3	44.8398	21.7463	NaN	NaN	51.4901	53.0419	NaN	NaN
60	0.7	km	3	42.9741	15.0065	NaN	NaN	48.7329	44.2536	NaN	NaN
70	0.7	km	3	43.7931	14.8629	NaN	NaN	49.5675	40.4677	NaN	NaN
80	0.7	km	3	42.2007	10.6125	NaN	NaN	46.6788	35.7654	NaN	NaN
90	0.7	km	3	43.0594	11.3063	NaN	NaN	47.1026	33.7105	NaN	NaN
100	0.7	km	3	42.6235	9.48592	NaN	NaN	46.8333	32.4544	NaN	NaN
5	0.8	km	3	195.522	NaN	NaN	NaN	294.396	NaN	NaN	NaN
10	0.8	km	3	169.572	NaN	NaN	NaN	272.869	NaN	NaN	NaN
20	0.8	km	3	118.233	57.1576	NaN	NaN	150.62	142.869	NaN	NaN
30	0.8	km	3	103.679	49.4864	NaN	NaN	124.646	103.419	NaN	NaN
40	0.8	km	3	91.5573	24.2572	NaN	NaN	99.0616	63.6598	NaN	NaN
50	0.8	km	3	88.1151	22.2605	NaN	NaN	92.121	51.6053	NaN	NaN
60	0.8	km	3	84.429	14.6655	NaN	NaN	88.1828	49.2319	NaN	NaN
70	0.8	km	3	81.8078	9.81435	NaN	NaN	84.7893	36.8355	NaN	NaN
80	0.8	km	3	81.9912	10.0079	NaN	NaN	84.5193	36.6203	NaN	NaN
90	0.8	km	3	81.4698	9.0731	NaN	NaN	83.5705	31.9895	NaN	NaN
100	0.8	km	3	79.5247	7.52356	NaN	NaN	81.2186	30.7321	NaN	NaN
5	0.9	km	3	387.777	NaN	NaN	NaN	520.496	NaN	NaN	NaN
10	0.9	km	3	347.826	NaN	NaN	NaN	451.737	NaN	NaN	NaN
20	0.9	km	3	287.821	67.1929	NaN	NaN	366.475	134.637	NaN	NaN
30	0.9	km	3	246.996	51.7783	NaN	NaN	281.139	100.081	NaN	NaN
40	0.9	km	3	232.242	25.3466	NaN	NaN	282.755	68.2112	NaN	NaN
50	0.9	km	3	209.979	20.2289	NaN	NaN	221.12	51.5043	NaN	NaN
60	0.9	km	3	204.491	14.8471	NaN	NaN	221.883	45.6822	NaN	NaN
70	0.9	km	3	196.452	15.4499	NaN	NaN	203.569	42.615	NaN	NaN
80	0.9	km	3	191.216	11.0708	NaN	NaN	195.001	36.2659	NaN	NaN
90	0.9	km	3	188.374	9.49197	NaN	NaN	191.876	31.6692	NaN	NaN
100	0.9	km	3	184.946	8.35834	NaN	NaN	187.317	31.2095	NaN	NaN
5	0.1	km	4	5.61981	NaN	NaN	NaN	130.746	NaN	NaN	NaN
10	0.1	km	4	2.58804	NaN	NaN	NaN	88.5058	NaN	NaN	NaN
20	0.1	km	4	1.89439	94.1598	NaN	NaN	58.189	214.832	NaN	NaN
30	0.1	km	4	-3.49622	66.8848	NaN	NaN	60.3883	192.958	NaN	NaN
40	0.1	km	4	-0.797261	29.6851	NaN	NaN	45.1427	80.7474	NaN	NaN
50	0.1	km	4	0.837042	30.5789	NaN	NaN	44.8558	77.6622	NaN	NaN
60	0.1	km	4	-0.659994	19.3282	NaN	NaN	33.2563	56.1449	NaN	NaN
70	0.1	km	4	2.11832	22.8674	NaN	NaN	35.1005	58.1034	NaN	NaN
80	0.1	km	4	-0.196637	14.278	NaN	NaN	31.5892	47.4377	NaN	NaN
90	0.1	km	4	0.390001	13.4922	NaN	NaN	37.289	45.6311	NaN	NaN
100	0.1	km	4	0.0743227	12.0087	NaN	NaN	29.3597	41.2169	NaN	NaN
5	0.2	km	4	10.1835	NaN	NaN	NaN	138.473	NaN	NaN	NaN
10	0.2	km	4	-2.41944	NaN	NaN	NaN	79.5514	NaN	NaN	NaN
20	0.2	km	4	0.385749	91.8869	NaN	NaN	64.9589	249.949	NaN	NaN
30	0.2	km	4	0.777302	74.0643	NaN	NaN	57.4081	181.325	NaN	NaN
40	0.2	km	4	0.965989	39.2193	NaN	NaN	42.8781	97.3126	NaN	NaN
50	0.2	km	4	1.96791	31.5089	NaN	NaN	41.0897	73.4226	NaN	NaN
60	0.2	km	4	2.22462	21.1507	NaN	NaN	44.5075	61.8692	NaN	NaN
70	0.2	km	4	-1.05711	15.4195	NaN	NaN	35.9087	50.6843	NaN	NaN
80	0.2	km	4	2.50498	13.7364	NaN	NaN	38.028	50.1794	NaN	NaN
90	0.2	km	4	0.953259	12.0138	NaN	NaN	31.6046	42.112	NaN	NaN
100	0.2	km	4	0.127024	10.5144	NaN	NaN	27.932	37.8184	NaN	NaN
5	0.3	km	4	7.51011	NaN	NaN	NaN	116.701	NaN	NaN	NaN
10	0.3	km	4	6.69201	NaN	NaN	NaN	86.2721	NaN	NaN	NaN
20	0.3	km	4	3.63745	91.1605	NaN	NaN	67.2989	252.275	NaN	NaN
30	0.3	km	4	2.50116	75.7999	NaN	NaN	49.8854	160.305	NaN	NaN
40	0.3	km	4	0.378815	33.9885	NaN	NaN	46.3024	100.99	NaN	NaN
50	0.3	km	4	3.55218	32.2624	NaN	NaN	49.0232	76.0467	NaN	NaN
60	0.3	km	4	-0.268045	18.6252	NaN	NaN	35.0889	60.9993	NaN	NaN
70	0.3	km	4	1.94124	19.7081	NaN	NaN	36.287	54.251	NaN	NaN
80	0.3	km	4	2.80346	15.9177	NaN	NaN	34.7567	49.6452	NaN	NaN
90	0.3	km	4	1.13337	11.8531	NaN	NaN	33.9454	41.2851	NaN	NaN
100	0.3	km	4	1.58761	11.2621	NaN	NaN	31.5065	43.0029	NaN	NaN
5	0.4	km	4	17.8338	NaN	NaN	NaN	133.354	NaN	NaN	NaN
10	0.4	km	4	13.4186	NaN	NaN	NaN	100.831	NaN	NaN	NaN
20	0.4	km	4	3.17858	81.1398	NaN	NaN	61.3424	233.638	NaN	NaN
30	0.4	km	4	3.42878	69.1045	NaN	NaN	49.5137	152.093	NaN	NaN
40	0.4	km	4	2.65336	28.6883	NaN	NaN	41.7427	85.9041	NaN	NaN
50	0.4	km	4	6.85112	32.392	NaN	NaN	41.6074	73.5846	NaN	NaN
60	0.4	km	4	5.49255	22.1228	NaN	NaN	38.8175	63.0936	NaN	NaN
70	0.4	km	4	4.42756	19.6913	NaN	NaN	31.6892	53.4832	NaN	NaN
80	0.4	km	4	3.19135	12.4869	NaN	NaN	30.2611	45.7506	NaN	NaN
90	0.4	km	4	4.33809	13.8542	NaN	NaN	30.9113	44.9854	NaN	NaN
100	0.4	km	4	4.44797	12.4635	NaN	NaN	27.8426	42.4732	NaN	NaN
5	0.5	km	4	47.5596	NaN	NaN	NaN	202.315	NaN	NaN	NaN
10	0.5	km	4	23.8825	NaN	NaN	NaN	99.1926	NaN	NaN	NaN
20	0.5	km	4	12.0962	93.1769	NaN	NaN	62.919	224.912	NaN	NaN
30	0.5	km	4	8.16087	67.2243	NaN	NaN	48.7194	150.254	NaN	NaN
40	0.5	km	4	10.3511	35.5824	NaN	NaN	48.6394	92.5062	NaN	NaN
50	0.5	km	4	9.75355	30.1196	NaN	NaN	38.7909	71.5637	NaN	NaN
60	0.5	km	4	10.0738	22.1466	NaN	NaN	39.4255	66.7259	NaN	NaN
70	0.5	km	4	10.4434	20.3458	NaN	NaN	37.3676	55.3409	NaN	NaN
80	0.5	km	4	10.5012	17.1909	NaN	NaN	36.1612	50.6934	NaN	NaN
90	0.5	km	4	11.0067	14.6386	NaN	NaN	34.2218	44.4108	NaN	NaN
100	0.5	km	4	10.0137	12.4201	NaN	NaN	30.8033	39.0985	NaN	NaN
5	0.6	km	4	80.0702	NaN	NaN	NaN	306.617	NaN	NaN	NaN
10	0.6	km	4	41.5848	NaN	NaN	NaN	153.303	NaN	NaN	NaN
20	0.6	km	4	24.366	91.0486	NaN	NaN	63.7736	217.705	NaN	NaN
30	0.6	km	4	23.9119	82.224	NaN	NaN	75.5014	241.238	NaN	NaN
40	0.6	km	4	21.9065	38.6347	NaN	NaN	54.7751	97.9926	NaN	NaN
50	0.6	km	4	20.3777	32.1735	NaN	NaN	44.6813	75.7579	NaN	NaN
60	0.6	km	4	18.6672	19.7488	NaN	NaN	40.3742	61.5256	NaN	NaN
70	0.6	km	4	19.589	20.6702	NaN	NaN	39.4629	55.1488	NaN	NaN
80	0.6	km	4	19.0503	17.3245	NaN	NaN	37.3181	51.9022	NaN	NaN
90	0.6	km	4	17.5003	13.3277	NaN	NaN	35.1761	44.016	NaN	NaN
100	0.6	km	4	18.6319	11.0878	NaN	NaN	36.1065	39.8295	NaN	NaN
5	0.7	km	4	146.982	NaN	NaN	NaN	453.731	NaN	NaN	NaN
10	0.7	km	4	92.8444	NaN	NaN	NaN	301.476	NaN	NaN	NaN
20	0.7	km	4	46.5373	82.9516	NaN	NaN	93.5544	237.378	NaN	NaN
30	0.7	km	4	41.9331	76.6168	NaN	NaN	68.8717	173.886	NaN	NaN
40	0.7	km	4	38.7958	37.1105	NaN	NaN	60.6022	103.46	NaN	NaN
50	0.7	km	4	37.4631	31.2096	NaN	NaN	53.9485	72.3408	NaN	NaN
60	0.7	km	4	34.6125	21.2795	NaN	NaN	49.2077	61.2746	NaN	NaN
70	0.7	km	4	36.2084	19.5867	NaN	NaN	52.6012	53.8222	NaN	NaN
80	0.7	km	4	34.846	15.3168	NaN	NaN	47.1311	46.9449	NaN	NaN
90	0.7	km	4	36.0127	14.2355	NaN	NaN	46.8745	43.4913	NaN	NaN
100	0.7	km	4	35.803	12.8233	NaN	NaN	47.6151	41.8347	NaN	NaN
5	0.8	km	4	212.809	NaN	NaN	NaN	401.611	NaN	NaN	NaN
10	0.8	km	4	168.697	NaN	NaN	NaN	306.544	NaN	NaN	NaN
20	0.8	km	4	117.636	87.856	NaN	NaN	192.203	239.903	NaN	NaN
30	0.8	km	4	97.1924	76.0292	NaN	NaN	135.323	166.106	NaN	NaN
40	0.8	km	4	83.607	33.2423	NaN	NaN	97.7212	82.5043	NaN	NaN
50	0.8	km	4	79.2264	31.4712	NaN	NaN	88.5103	70.762	NaN	NaN
60	0.8	km	4	76.5585	23.1454	NaN	NaN	85.7597	73.0676	NaN	NaN
70	0.8	km	4	74.2554	16.7281	NaN	NaN	82.5606	51.7782	NaN	NaN
80	0.8	km	4	73.053	13.4488	NaN	NaN	80.5438	48.092	NaN	NaN
90	0.8	km	4	72.9382	13.5481	NaN	NaN	78.308	41.7085	NaN	NaN
100	0.8	km	4	69.9983	10.7471	NaN	NaN	74.2887	40.393	NaN	NaN
5	0.9	km	4	472.326	NaN	NaN	NaN	733.428	NaN	NaN	NaN
10	0.9	km	4	429.733	NaN	NaN	NaN	664.301	NaN	NaN	NaN
20	0.9	km	4	339.035	107.32	NaN	NaN	518.187	227.771	NaN	NaN
30	0.9	km	4	286.613	79.8791	NaN	NaN	501.737	167.894	NaN	NaN
40	0.9	km	4	241.224	37.2725	NaN	NaN	307.4	100.473	NaN	NaN
50	0.9	km	4	213.892	28.9432	NaN	NaN	230.401	73.4787	NaN	NaN
60	0.9	km	4	209.894	19.4237	NaN	NaN	229.996	58.2625	NaN	NaN
70	0.9	km	4	201.534	21.0221	NaN	NaN	215.433	56.5534	NaN	NaN
80	0.9	km	4	193.572	15.1678	NaN	NaN	202.287	47.0064	NaN	NaN
90	0.9	km	4	187.786	13.2984	NaN	NaN	192.419	42.5617	NaN	NaN
100	0.9	km	4	187.471	12.0215	NaN	NaN	192.474	40.7739	NaN	NaN
5	0.1	km	5	3.73859	NaN	NaN	NaN	170.532	NaN	NaN	NaN
10	0.1	km	5	4.72945	NaN	NaN	NaN	117.754	NaN	NaN	NaN
20	0.1	km	5	2.77759	132.249	NaN	NaN	79.9173	327.232	NaN	NaN
30	0.1	km	5	-0.834584	102.743	NaN	NaN	106.801	362.774	NaN	NaN
40	0.1	km	5	-1.46913	38.3866	NaN	NaN	59.7599	105.503	NaN	NaN
50	0.1	km	5	0.0613881	38.6228	NaN	NaN	62.129	98.209	NaN	NaN
60	0.1	km	5	-0.272428	25.578	NaN	NaN	51.56	71.5425	NaN	NaN
70	0.1	km	5	2.54606	26.8254	NaN	NaN	49.5301	69.6061	NaN	NaN
80	0.1	km	5	0.121772	17.1546	NaN	NaN	45.4802	57.7315	NaN	NaN
90	0.1	km	5	-0.560682	17.21	NaN	NaN	41.6674	54.6711	NaN	NaN
100	0.1	km	5	-0.616916	14.976	NaN	NaN	38.7082	48.1368	NaN	NaN
5	0.2	km	5	10.7532	NaN	NaN	NaN	184.423	NaN	NaN	NaN
10	0.2	km	5	-2.74076	NaN	NaN	NaN	107.579	NaN	NaN	NaN
20	0.2	km	5	-0.915786	122.505	NaN	NaN	86.5791	355.682	NaN	NaN
30	0.2	km	5	-1.30276	97.3015	NaN	NaN	72.5841	243.419	NaN	NaN
40	0.2	km	5	0.322063	49.2623	NaN	NaN	56.5772	121.33	NaN	NaN
50	0.2	km	5	2.18179	41.4283	NaN	NaN	58.148	93.1257	NaN	NaN
60	0.2	km	5	1.8328	24.5308	NaN	NaN	65.7374	72.5155	NaN	NaN
70	0.2	km	5	-1.04274	20.7263	NaN	NaN	57.4774	62.7689	NaN	NaN
80	0.2	km	5	4.07631	18.8037	NaN	NaN	63.1418	61.6646	NaN	NaN
90	0.2	km	5	1.58067	13.8148	NaN	NaN	55.5192	50.2191	NaN	NaN
100	0.2	km	5	0.0263137	13.4984	NaN	NaN	40.621	45.861	NaN	NaN
5	0.3	km	5	3.28941	NaN	NaN	NaN	147.304	NaN	NaN	NaN
10	0.3	km	5	6.98496	NaN	NaN	NaN	122.089	NaN	NaN	NaN
20	0.3	km	5	2.39412	127.539	NaN	NaN	91.76	388.86	NaN	NaN
30	0.3	km	5	1.92063	102.962	NaN	NaN	66.4124	225.866	NaN	NaN
40	0.3	km	5	-2.13084	42.0169	NaN	NaN	62.4001	130.495	NaN	NaN
50	0.3	km	5	4.10022	42.8056	NaN	NaN	83.0263	97.662	NaN	NaN
60	0.3	km	5	-1.47283	25.3878	NaN	NaN	46.4657	77.257	NaN	NaN
70	0.3	km	5	0.448549	24.8088	NaN	NaN	45.2504	66.9744	NaN	NaN
80	0.3	km	5	1.43604	17.9059	NaN	NaN	42.1855	57.7989	NaN	NaN
90	0.3	km	5	-0.129201	15.5088	NaN	NaN	41.0043	50.8631	NaN	NaN
100	0.3	km	5	1.53736	15.3598	NaN	NaN	43.8438	52.3208	NaN	NaN
5	0.4	km	5	14.6373	NaN	NaN	NaN	150.06	NaN	NaN	NaN
10	0.4	km	5	10.9357	NaN	NaN	NaN	129.98	NaN	NaN	NaN
20	0.4	km	5	1.21712	117.916	NaN	NaN	86.3461	372.249	NaN	NaN
30	0.4	km	5	0.275473	93.0302	NaN	NaN	62.8416	210.101	NaN	NaN
40	0.4	km	5	1.55704	41.2738	NaN	NaN	57.6616	121.436	NaN	NaN
50	0.4	km	5	4.85993	39.1523	NaN	NaN	55.6362	89.8637	NaN	NaN
60	0.4	km	5	4.7055	28.3002	NaN	NaN	54.3198	78.7648	NaN	NaN
70	0.4	km	5	3.55949	26.0135	NaN	NaN	42.7666	67.0731	NaN	NaN
80	0.4	km	5	1.26272	16.1312	NaN	NaN	39.9638	56.1296	NaN	NaN
90	0.4	km	5	3.25777	18.257	NaN	NaN	42.6829	55.1404	NaN	NaN
100	0.4	km	5	2.24991	15.3632	NaN	NaN	36.8057	51.2895	NaN	NaN
5	0.5	km	5	51.178	NaN	NaN	NaN	306.827	NaN	NaN	NaN
10	0.5	km	5	19.1987	NaN	NaN	NaN	129.916	NaN	NaN	NaN
20	0.5	km	5	9.87977	128.376	NaN	NaN	84.3445	332.826	NaN	NaN
30	0.5	km	5	7.49693	101.247	NaN	NaN	73.8179	248.403	NaN	NaN
40	0.5	km	5	8.16592	43.9817	NaN	NaN	67.8476	114.487	NaN	NaN
50	0.5	km	5	7.85684	38.4573	NaN	NaN	53.1205	90.3603	NaN	NaN
60	0.5	km	5	7.79574	27.7068	NaN	NaN	53.0528	82.8976	NaN	NaN
70	0.5	km	5	8.50723	24.6962	NaN	NaN	52.3838	66.903	NaN	NaN
80	0.5	km	5	8.2874	22.5865	NaN	NaN	51.352	61.4097	NaN	NaN
90	0.5	km	5	8.32034	16.3593	NaN	NaN	48.4318	50.8025	NaN	NaN
100	0.5	km	5	8.633	15.3411	NaN	NaN	47.0316	46.4111	NaN	NaN
5	0.6	km	5	75.4085	NaN	NaN	NaN	449.898	NaN	NaN	NaN
10	0.6	km	5	39.5381	NaN	NaN	NaN	205.31	NaN	NaN	NaN
20	0.6	km	5	17.0309	117.816	NaN	NaN	74.2251	295.034	NaN	NaN
30	0.6	km	5	19.4128	112.391	NaN	NaN	123.86	424.315	NaN	NaN
40	0.6	km	5	17.1967	49.4214	NaN	NaN	75.0402	123.939	NaN	NaN
50	0.6	km	5	15.1415	40.7302	NaN	NaN	55.8948	96.9083	NaN	NaN
60	0.6	km	5	14.3869	25.0944	NaN	NaN	51.0286	80.2701	NaN	NaN
70	0.6	km	5	14.6559	25.0454	NaN	NaN	50.2547	66.5253	NaN	NaN
80	0.6	km	5	14.9927	21.4286	NaN	NaN	46.0065	62.9118	NaN	NaN
90	0.6	km	5	14.2104	17.8942	NaN	NaN	46.327	54.5764	NaN	NaN
100	0.6	km	5	14.5992	14.7146	NaN	NaN	42.7087	48.5543	NaN	NaN
5	0.7	km	5	155.848	NaN	NaN	NaN	620.355	NaN	NaN	NaN
10	0.7	km	5	95.3928	NaN	NaN	NaN	416.628	NaN	NaN	NaN
20	0.7	km	5	38.786	107.218	NaN	NaN	114.144	350.416	NaN	NaN
30	0.7	km	5	36.408	106.734	NaN	NaN	81.3244	246.264	NaN	NaN
40	0.7	km	5	33.5422	49.3269	NaN	NaN	73.1145	137.821	NaN	NaN
50	0.7	km	5	31.1812	39.8514	NaN	NaN	64.2678	90.678	NaN	NaN
60	0.7	km	5	28.3051	27.9272	NaN	NaN	56.6945	79.9658	NaN	NaN
70	0.7	km	5	30.3129	24.1245	NaN	NaN	65.2534	66.5075	NaN	NaN
80	0.7	km	5	28.3396	19.1618	NaN	NaN	53.553	57.0619	NaN	NaN
90	0.7	km	5	29.6262	16.2621	NaN	NaN	51.8527	50.7848	NaN	NaN
100	0.7	km	5	29.8404	15.3941	NaN	NaN	56.1351	50.4868	NaN	NaN
5	0.8	km	5	216.045	NaN	NaN	NaN	507.145	NaN	NaN	NaN
10	0.8	km	5	172.215	NaN	NaN	NaN	360.859	NaN	NaN	NaN
20	0.8	km	5	108.913	121.592	NaN	NaN	215.96	364.372	NaN	NaN
30	0.8	km	5	86.2611	101.976	NaN	NaN	140.342	242.014	NaN	NaN
40	0.8	km	5	75.2778	42.4967	NaN	NaN	105.051	114.1	NaN	NaN
50	0.8	km	5	69.6286	39.2603	NaN	NaN	86	86.3765	NaN	NaN
60	0.8	km	5	67.6379	27.7558	NaN	NaN	86.6647	86.5738	NaN	NaN
70	0.8	km	5	66.5454	22.0236	NaN	NaN	85.6984	63.6004	NaN	NaN
80	0.8	km	5	64.5921	16.5374	NaN	NaN	82.0196	56.5282	NaN	NaN
90	0.8	km	5	64.8049	17.3419	NaN	NaN	76.9066	50.8201	NaN	NaN
100	0.8	km	5	60.103	13.0228	NaN	NaN	68.4994	46.8075	NaN	NaN
5	0.9	km	5	566.372	NaN	NaN	NaN	1055.98	NaN	NaN	NaN
10	0.9	km	5	457.082	NaN	NaN	NaN	759.673	NaN	NaN	NaN
20	0.9	km	5	382.86	149.681	NaN	NaN	727.911	331.136	NaN	NaN
30	0.9	km	5	288.368	108.482	NaN	NaN	445.111	246.079	NaN	NaN
40	0.9	km	5	236.504	45.0442	NaN	NaN	306.431	119.973	NaN	NaN
50	0.9	km	5	211.173	37.8057	NaN	NaN	245.666	97.2184	NaN	NaN
60	0.9	km	5	201.246	23.2941	NaN	NaN	221.925	70.2469	NaN	NaN
70	0.9	km	5	197.084	27.0383	NaN	NaN	223.159	72.1805	NaN	NaN
80	0.9	km	5	183.96	18.5854	NaN	NaN	192.558	57.6434	NaN	NaN
90	0.9	km	5	180.188	16.4293	NaN	NaN	187.416	51.3505	NaN	NaN
100	0.9	km	5	179.239	14.4002	NaN	NaN	186.884	48.2063	NaN	NaN

## Sheet: mixed GMs=1 & 10
Comparison of Methods for Analyzing Left-Censored Occupational Exposure Data
Tran Huynh, Gurumurthy Ramachandran, Sudipto Banerjee, Joao Monteiro, Mark Stenzel, Dale P Sandler, Lawrence S Engel, Richard K Kwok, Aaron Blair and Patricia A Stewart
N	p	Method	GSD	BiasAM	Bias95th	BiasAM (ml-AM)	BiasAM (MVUE-AM)	rMSEam	rMSE95th	rMSEam (ml-AM)	rMSEam (MVUE-AM)
5	0.1	beta	2	1.83494	0.326576	NaN	NaN	60.3832	61.4656	NaN	NaN
10	0.1	beta	2	0.61937	3.51522	NaN	NaN	39.9875	43.1868	NaN	NaN
20	0.1	beta	2	1.52009	5.34146	NaN	NaN	29.9247	32.797	NaN	NaN
30	0.1	beta	2	-1.64771	2.3078	NaN	NaN	24.0586	26.6156	NaN	NaN
40	0.1	beta	2	0.229533	4.30522	NaN	NaN	20.008	22.3649	NaN	NaN
50	0.1	beta	2	-0.0185289	4.3694	NaN	NaN	19.0072	21.4094	NaN	NaN
60	0.1	beta	2	-0.283485	3.98117	NaN	NaN	16.5785	18.612	NaN	NaN
70	0.1	beta	2	0.160995	4.54224	NaN	NaN	15.6243	17.8679	NaN	NaN
80	0.1	beta	2	0.401249	4.55723	NaN	NaN	14.4453	16.5956	NaN	NaN
90	0.1	beta	2	-0.151445	4.02543	NaN	NaN	13.753	15.7694	NaN	NaN
100	0.1	beta	2	-0.518442	3.823	NaN	NaN	13.4775	15.425	NaN	NaN
5	0.2	beta	2	0.323377	-2.6412	NaN	NaN	61.7892	62.4003	NaN	NaN
10	0.2	beta	2	-0.0228344	3.35902	NaN	NaN	42.2424	45.5146	NaN	NaN
20	0.2	beta	2	-0.851168	4.11968	NaN	NaN	29.9857	32.9896	NaN	NaN
30	0.2	beta	2	-0.967752	4.15983	NaN	NaN	24.5548	27.2685	NaN	NaN
40	0.2	beta	2	-1.21177	3.70095	NaN	NaN	20.6056	22.9408	NaN	NaN
50	0.2	beta	2	0.0879192	5.30945	NaN	NaN	18.5168	21.1315	NaN	NaN
60	0.2	beta	2	0.159026	5.1586	NaN	NaN	16.9869	19.437	NaN	NaN
70	0.2	beta	2	-1.56026	3.67426	NaN	NaN	15.259	17.3208	NaN	NaN
80	0.2	beta	2	-0.384185	4.83371	NaN	NaN	14.8012	17.2057	NaN	NaN
90	0.2	beta	2	-0.0358795	5.20043	NaN	NaN	13.8335	16.2647	NaN	NaN
100	0.2	beta	2	-0.942669	4.27846	NaN	NaN	13.1871	15.1488	NaN	NaN
5	0.3	beta	2	-0.161437	-1.93992	NaN	NaN	57.3339	59.1166	NaN	NaN
10	0.3	beta	2	-0.897272	2.4969	NaN	NaN	40.5799	44.0841	NaN	NaN
20	0.3	beta	2	0.984775	6.29011	NaN	NaN	29.262	32.5731	NaN	NaN
30	0.3	beta	2	-1.38478	4.60566	NaN	NaN	22.5322	25.3237	NaN	NaN
40	0.3	beta	2	-1.88977	4.13585	NaN	NaN	21.1112	23.658	NaN	NaN
50	0.3	beta	2	-0.0471357	6.29436	NaN	NaN	18.5512	21.3322	NaN	NaN
60	0.3	beta	2	-2.04638	4.21838	NaN	NaN	16.6616	19.0564	NaN	NaN
70	0.3	beta	2	-0.93958	5.35091	NaN	NaN	15.7665	18.1623	NaN	NaN
80	0.3	beta	2	-0.93588	5.55645	NaN	NaN	14.8052	17.2332	NaN	NaN
90	0.3	beta	2	-0.912279	5.38684	NaN	NaN	13.7448	16.1004	NaN	NaN
100	0.3	beta	2	-1.39952	4.96514	NaN	NaN	13.2021	15.3532	NaN	NaN
5	0.4	beta	2	-5.13138	-7.6657	NaN	NaN	53.3728	56.7905	NaN	NaN
10	0.4	beta	2	-0.314403	2.34334	NaN	NaN	42.0885	45.6153	NaN	NaN
20	0.4	beta	2	-2.22404	3.02134	NaN	NaN	29.1606	31.5165	NaN	NaN
30	0.4	beta	2	-2.16533	3.79421	NaN	NaN	24.5524	26.7792	NaN	NaN
40	0.4	beta	2	-1.63094	4.26295	NaN	NaN	20.7328	22.7834	NaN	NaN
50	0.4	beta	2	-0.661453	6.08941	NaN	NaN	18.8079	21.336	NaN	NaN
60	0.4	beta	2	-0.875189	5.65086	NaN	NaN	16.7666	19.0683	NaN	NaN
70	0.4	beta	2	-0.602854	6.08809	NaN	NaN	15.6619	18.0885	NaN	NaN
80	0.4	beta	2	-1.29851	5.5276	NaN	NaN	14.4249	16.6454	NaN	NaN
90	0.4	beta	2	-0.80072	6.08072	NaN	NaN	13.8057	16.4915	NaN	NaN
100	0.4	beta	2	-0.871906	6.11881	NaN	NaN	13.1399	15.7159	NaN	NaN
5	0.5	beta	2	4.50061	-0.892847	NaN	NaN	59.2492	62.1789	NaN	NaN
10	0.5	beta	2	2.99738	2.531	NaN	NaN	41.9707	44.5049	NaN	NaN
20	0.5	beta	2	0.839784	2.27304	NaN	NaN	30.1508	32.4111	NaN	NaN
30	0.5	beta	2	0.210527	2.61007	NaN	NaN	24.1985	26.094	NaN	NaN
40	0.5	beta	2	0.819759	3.97131	NaN	NaN	21.1823	23.3716	NaN	NaN
50	0.5	beta	2	1.96125	5.04704	NaN	NaN	18.7688	20.3013	NaN	NaN
60	0.5	beta	2	1.09504	4.45469	NaN	NaN	16.7051	18.7363	NaN	NaN
70	0.5	beta	2	0.999479	4.17121	NaN	NaN	15.5504	17.4417	NaN	NaN
80	0.5	beta	2	1.20501	4.75449	NaN	NaN	15.3041	17.4449	NaN	NaN
90	0.5	beta	2	1.79641	5.173	NaN	NaN	13.6719	15.4548	NaN	NaN
100	0.5	beta	2	1.43139	4.71383	NaN	NaN	13.3092	15.0045	NaN	NaN
5	0.6	beta	2	13.7802	-2.75564	NaN	NaN	53.8543	54.8541	NaN	NaN
10	0.6	beta	2	8.44868	-1.89274	NaN	NaN	43.2369	45.4145	NaN	NaN
20	0.6	beta	2	6.69097	-0.347252	NaN	NaN	30.1532	31.8665	NaN	NaN
30	0.6	beta	2	6.17483	-0.44816	NaN	NaN	23.9347	25.513	NaN	NaN
40	0.6	beta	2	7.12271	0.202044	NaN	NaN	21.3991	22.1738	NaN	NaN
50	0.6	beta	2	6.95716	0.732404	NaN	NaN	19.1742	19.7149	NaN	NaN
60	0.6	beta	2	6.45433	-0.201035	NaN	NaN	17.646	18.4745	NaN	NaN
70	0.6	beta	2	8.20271	1.36262	NaN	NaN	17.8851	16.9325	NaN	NaN
80	0.6	beta	2	7.20446	0.813042	NaN	NaN	16.1761	15.8549	NaN	NaN
90	0.6	beta	2	6.70838	-0.0236751	NaN	NaN	15.1901	14.608	NaN	NaN
100	0.6	beta	2	7.34407	0.899402	NaN	NaN	14.7356	13.9426	NaN	NaN
5	0.7	beta	2	30.7223	0.828204	NaN	NaN	58.2048	55.1889	NaN	NaN
10	0.7	beta	2	16.1045	-6.16292	NaN	NaN	42.3644	42.7799	NaN	NaN
20	0.7	beta	2	11.772	-5.01114	NaN	NaN	30.5297	30.1995	NaN	NaN
30	0.7	beta	2	12.5178	-3.11671	NaN	NaN	27.2107	25.5681	NaN	NaN
40	0.7	beta	2	13.1412	-2.25921	NaN	NaN	24.4563	22.5381	NaN	NaN
50	0.7	beta	2	12.8004	-1.55531	NaN	NaN	22.5623	19.7553	NaN	NaN
60	0.7	beta	2	12.5269	-1.88169	NaN	NaN	20.8236	18.3124	NaN	NaN
70	0.7	beta	2	13.2803	-0.993649	NaN	NaN	20.5584	16.8139	NaN	NaN
80	0.7	beta	2	12.7623	-1.76384	NaN	NaN	19.2394	15.7027	NaN	NaN
90	0.7	beta	2	13.4096	-0.887363	NaN	NaN	19.0072	14.4747	NaN	NaN
100	0.7	beta	2	13.543	-0.892182	NaN	NaN	18.7558	14.3236	NaN	NaN
5	0.8	beta	2	56.0479	8.22706	NaN	NaN	69.75	50.8535	NaN	NaN
10	0.8	beta	2	33.2103	-2.88337	NaN	NaN	50.3719	40.1041	NaN	NaN
20	0.8	beta	2	19.4303	-8.30878	NaN	NaN	37.9821	31.4149	NaN	NaN
30	0.8	beta	2	18.6594	-4.73532	NaN	NaN	33.7409	26.1448	NaN	NaN
40	0.8	beta	2	19.5927	-3.04809	NaN	NaN	30.6716	22.1966	NaN	NaN
50	0.8	beta	2	18.6461	-3.15848	NaN	NaN	28.5597	19.7079	NaN	NaN
60	0.8	beta	2	18.5362	-3.32695	NaN	NaN	27.224	18.4237	NaN	NaN
70	0.8	beta	2	17.816	-4.20475	NaN	NaN	24.9466	16.8028	NaN	NaN
80	0.8	beta	2	19.9015	-2.38995	NaN	NaN	25.4191	15.5534	NaN	NaN
90	0.8	beta	2	18.664	-2.73142	NaN	NaN	24.0736	14.6297	NaN	NaN
100	0.8	beta	2	18.9086	-3.17319	NaN	NaN	23.6749	13.8128	NaN	NaN
5	0.9	beta	2	112.303	37.0401	NaN	NaN	119.525	65.5167	NaN	NaN
10	0.9	beta	2	72.9484	11.9267	NaN	NaN	87.1797	38.4581	NaN	NaN
20	0.9	beta	2	46.7808	-2.79374	NaN	NaN	66.6586	28.8301	NaN	NaN
30	0.9	beta	2	37.8374	-3.73713	NaN	NaN	56.2409	24.0036	NaN	NaN
40	0.9	beta	2	33.5436	-5.58358	NaN	NaN	52.251	24.3501	NaN	NaN
50	0.9	beta	2	31.6559	-4.28885	NaN	NaN	46.9813	21.3872	NaN	NaN
60	0.9	beta	2	27.831	-4.69767	NaN	NaN	43.0847	19.9094	NaN	NaN
70	0.9	beta	2	27.1557	-3.68078	NaN	NaN	40.7179	18.5759	NaN	NaN
80	0.9	beta	2	27.8438	-3.52155	NaN	NaN	39.6004	17.749	NaN	NaN
90	0.9	beta	2	26.5114	-3.45666	NaN	NaN	37.0022	15.5985	NaN	NaN
100	0.9	beta	2	26.78	-3.13794	NaN	NaN	36.783	14.8716	NaN	NaN
5	0.1	beta	3	1.958	-14.55	NaN	NaN	97.783	81.8658	NaN	NaN
10	0.1	beta	3	1.83334	-8.90109	NaN	NaN	66.771	58.5145	NaN	NaN
20	0.1	beta	3	2.30105	-5.47037	NaN	NaN	47.3996	44.3205	NaN	NaN
30	0.1	beta	3	-2.75093	-9.63867	NaN	NaN	40.6728	38.2214	NaN	NaN
40	0.1	beta	3	-0.202079	-6.69568	NaN	NaN	32.4713	31.6099	NaN	NaN
50	0.1	beta	3	0.298342	-6.03731	NaN	NaN	31.7376	30.5132	NaN	NaN
60	0.1	beta	3	-0.878941	-7.01358	NaN	NaN	25.9329	25.8207	NaN	NaN
70	0.1	beta	3	0.751999	-5.34909	NaN	NaN	25.4014	24.8536	NaN	NaN
80	0.1	beta	3	-0.297566	-6.33207	NaN	NaN	23.2504	23.3123	NaN	NaN
90	0.1	beta	3	0.0857045	-5.95947	NaN	NaN	23.6345	23.0434	NaN	NaN
100	0.1	beta	3	-0.626365	-6.50023	NaN	NaN	21.7428	21.9103	NaN	NaN
5	0.2	beta	3	1.77769	-16.6295	NaN	NaN	98.3645	82.6125	NaN	NaN
10	0.2	beta	3	-1.90529	-11.8317	NaN	NaN	65.1156	58.8088	NaN	NaN
20	0.2	beta	3	-0.835564	-8.46419	NaN	NaN	48.093	44.6932	NaN	NaN
30	0.2	beta	3	-0.836253	-7.83672	NaN	NaN	40.6219	38.0704	NaN	NaN
40	0.2	beta	3	-0.315326	-6.9713	NaN	NaN	32.9203	31.7896	NaN	NaN
50	0.2	beta	3	0.56609	-5.88761	NaN	NaN	29.5918	28.6203	NaN	NaN
60	0.2	beta	3	0.697415	-5.67701	NaN	NaN	28.1807	27.2718	NaN	NaN
70	0.2	beta	3	-1.57227	-7.58965	NaN	NaN	25.6115	25.5576	NaN	NaN
80	0.2	beta	3	0.620012	-5.45518	NaN	NaN	25.61	24.9195	NaN	NaN
90	0.2	beta	3	0.126895	-5.85517	NaN	NaN	23.0746	22.8594	NaN	NaN
100	0.2	beta	3	-0.347078	-6.17676	NaN	NaN	20.9918	21.1658	NaN	NaN
5	0.3	beta	3	-0.760065	-18.6207	NaN	NaN	90.6449	75.1196	NaN	NaN
10	0.3	beta	3	0.0966287	-11.618	NaN	NaN	64.066	57.5063	NaN	NaN
20	0.3	beta	3	0.510383	-7.74439	NaN	NaN	46.258	43.184	NaN	NaN
30	0.3	beta	3	-0.639539	-7.69803	NaN	NaN	36.964	35.3966	NaN	NaN
40	0.3	beta	3	-2.55591	-9.17053	NaN	NaN	34.0875	33.1549	NaN	NaN
50	0.3	beta	3	1.22219	-5.34764	NaN	NaN	31.5951	29.6921	NaN	NaN
60	0.3	beta	3	-2.45871	-8.70356	NaN	NaN	27.5649	27.2866	NaN	NaN
70	0.3	beta	3	-0.696082	-6.80432	NaN	NaN	26.1403	25.5012	NaN	NaN
80	0.3	beta	3	-0.01522	-5.9857	NaN	NaN	24.4569	24.0359	NaN	NaN
90	0.3	beta	3	-1.05344	-7.002	NaN	NaN	22.6794	22.5968	NaN	NaN
100	0.3	beta	3	-1.45652	-7.25406	NaN	NaN	21.377	21.7163	NaN	NaN
5	0.4	beta	3	-7.77995	-24.7181	NaN	NaN	76.6252	70.6144	NaN	NaN
10	0.4	beta	3	2.63143	-10.5765	NaN	NaN	69.9346	60.8223	NaN	NaN
20	0.4	beta	3	-1.80757	-10.5575	NaN	NaN	47.9986	43.4653	NaN	NaN
30	0.4	beta	3	-1.68612	-9.27259	NaN	NaN	38.5899	37.4274	NaN	NaN
40	0.4	beta	3	-1.15252	-8.22346	NaN	NaN	32.6864	31.7559	NaN	NaN
50	0.4	beta	3	1.0001	-5.63965	NaN	NaN	30.4508	29.2786	NaN	NaN
60	0.4	beta	3	0.491097	-6.14218	NaN	NaN	27.854	27.1728	NaN	NaN
70	0.4	beta	3	-0.0340784	-6.18534	NaN	NaN	23.9852	23.7949	NaN	NaN
80	0.4	beta	3	-1.14829	-7.27181	NaN	NaN	22.6947	22.9056	NaN	NaN
90	0.4	beta	3	0.123169	-6.03727	NaN	NaN	22.7161	22.6303	NaN	NaN
100	0.4	beta	3	0.279134	-5.75186	NaN	NaN	21.2907	21.2874	NaN	NaN
5	0.5	beta	3	6.69901	-15.4661	NaN	NaN	105.105	82.8447	NaN	NaN
10	0.5	beta	3	4.65691	-10.0296	NaN	NaN	72.0737	62.1847	NaN	NaN
20	0.5	beta	3	0.228027	-9.92296	NaN	NaN	46.9119	43.7962	NaN	NaN
30	0.5	beta	3	-1.91419	-10.162	NaN	NaN	36.9858	36.0754	NaN	NaN
40	0.5	beta	3	-0.221357	-7.91687	NaN	NaN	34.2492	32.7891	NaN	NaN
50	0.5	beta	3	0.467282	-6.82372	NaN	NaN	28.2518	27.685	NaN	NaN
60	0.5	beta	3	0.708656	-6.32571	NaN	NaN	27.4782	26.8262	NaN	NaN
70	0.5	beta	3	0.276741	-6.57216	NaN	NaN	25.6724	25.3966	NaN	NaN
80	0.5	beta	3	1.03884	-5.63071	NaN	NaN	25.0305	24.5674	NaN	NaN
90	0.5	beta	3	0.978263	-5.55299	NaN	NaN	22.4393	22.169	NaN	NaN
100	0.5	beta	3	0.922319	-5.57804	NaN	NaN	21.3111	21.3715	NaN	NaN
5	0.6	beta	3	9.98211	-16.1298	NaN	NaN	106.821	78.0436	NaN	NaN
10	0.6	beta	3	2.49988	-14.0834	NaN	NaN	66.0159	59.819	NaN	NaN
20	0.6	beta	3	1.30987	-10.128	NaN	NaN	46.0857	43.9362	NaN	NaN
30	0.6	beta	3	2.05936	-8.09102	NaN	NaN	42.2048	36.6828	NaN	NaN
40	0.6	beta	3	2.2921	-6.74759	NaN	NaN	33.3594	32.5954	NaN	NaN
50	0.6	beta	3	1.86108	-6.57594	NaN	NaN	29.4628	29.0057	NaN	NaN
60	0.6	beta	3	0.752982	-7.28749	NaN	NaN	27.1122	27.4322	NaN	NaN
70	0.6	beta	3	2.51385	-5.38598	NaN	NaN	25.2821	24.9593	NaN	NaN
80	0.6	beta	3	1.3238	-6.19668	NaN	NaN	23.8739	24.0545	NaN	NaN
90	0.6	beta	3	0.634763	-6.84069	NaN	NaN	22.1371	22.7688	NaN	NaN
100	0.6	beta	3	1.34864	-6.05239	NaN	NaN	21.2296	21.6758	NaN	NaN
5	0.7	beta	3	24.0725	-13.3039	NaN	NaN	105.91	74.2632	NaN	NaN
10	0.7	beta	3	7.55191	-15.8332	NaN	NaN	67.8706	58.9431	NaN	NaN
20	0.7	beta	3	0.337512	-14.5229	NaN	NaN	44.3829	43.4901	NaN	NaN
30	0.7	beta	3	2.13368	-10.444	NaN	NaN	38.1027	37.604	NaN	NaN
40	0.7	beta	3	2.4887	-8.63474	NaN	NaN	34.3071	33.2756	NaN	NaN
50	0.7	beta	3	2.97474	-7.03366	NaN	NaN	28.9808	29.1672	NaN	NaN
60	0.7	beta	3	1.71083	-8.16292	NaN	NaN	25.773	26.5892	NaN	NaN
70	0.7	beta	3	3.60198	-5.99029	NaN	NaN	26.4335	26.2447	NaN	NaN
80	0.7	beta	3	2.21716	-6.97596	NaN	NaN	23.0261	23.737	NaN	NaN
90	0.7	beta	3	3.87226	-5.21256	NaN	NaN	22.179	22.4301	NaN	NaN
100	0.7	beta	3	3.64965	-5.41336	NaN	NaN	22.2399	22.5627	NaN	NaN
5	0.8	beta	3	46.5455	1.08774	NaN	NaN	86.7978	67.9228	NaN	NaN
10	0.8	beta	3	20.9305	-12.2688	NaN	NaN	66.153	57.0144	NaN	NaN
20	0.8	beta	3	6.68468	-15.8593	NaN	NaN	45.7503	46.2831	NaN	NaN
30	0.8	beta	3	6.30783	-11.4694	NaN	NaN	38.9748	39.1382	NaN	NaN
40	0.8	beta	3	7.06098	-8.74118	NaN	NaN	33.6791	32.6226	NaN	NaN
50	0.8	beta	3	6.30971	-7.48521	NaN	NaN	29.7491	30.1729	NaN	NaN
60	0.8	beta	3	5.4845	-7.78249	NaN	NaN	28.5098	27.9857	NaN	NaN
70	0.8	beta	3	3.95072	-8.96991	NaN	NaN	25.4725	26.1554	NaN	NaN
80	0.8	beta	3	6.52082	-6.15163	NaN	NaN	24.5311	24.4213	NaN	NaN
90	0.8	beta	3	5.68614	-6.22685	NaN	NaN	21.7533	22.1964	NaN	NaN
100	0.8	beta	3	5.1217	-6.95018	NaN	NaN	19.9163	20.7885	NaN	NaN
5	0.9	beta	3	130.524	44.6619	NaN	NaN	158.857	95.4326	NaN	NaN
10	0.9	beta	3	72.8964	11.592	NaN	NaN	98.7604	61.9317	NaN	NaN
20	0.9	beta	3	34.46	-8.44137	NaN	NaN	60.7629	42.7531	NaN	NaN
30	0.9	beta	3	25.1492	-9.15492	NaN	NaN	49.8354	35.9196	NaN	NaN
40	0.9	beta	3	20.828	-9.71517	NaN	NaN	46.4092	36.3176	NaN	NaN
50	0.9	beta	3	17.313	-8.04768	NaN	NaN	40.149	31.7481	NaN	NaN
60	0.9	beta	3	13.9793	-8.41874	NaN	NaN	37.0068	30.4104	NaN	NaN
70	0.9	beta	3	14.7655	-6.70151	NaN	NaN	35.526	28.958	NaN	NaN
80	0.9	beta	3	13.8136	-6.4588	NaN	NaN	32.2103	26.7886	NaN	NaN
90	0.9	beta	3	11.8129	-6.90271	NaN	NaN	29.2329	24.3504	NaN	NaN
100	0.9	beta	3	12.459	-5.98178	NaN	NaN	28.8332	23.5373	NaN	NaN
5	0.1	beta	4	3.73392	-20.3444	NaN	NaN	141.333	99.0411	NaN	NaN
10	0.1	beta	4	2.13857	-14.7339	NaN	NaN	96.0725	69.7751	NaN	NaN
20	0.1	beta	4	1.76792	-10.3513	NaN	NaN	62.3636	50.6685	NaN	NaN
30	0.1	beta	4	-3.92594	-14.8458	NaN	NaN	65.8875	47.4729	NaN	NaN
40	0.1	beta	4	-1.19515	-11.0401	NaN	NaN	48.5223	40.9022	NaN	NaN
50	0.1	beta	4	0.666347	-9.34803	NaN	NaN	48.5137	39.1629	NaN	NaN
60	0.1	beta	4	-0.829855	-9.87501	NaN	NaN	35.9955	31.9342	NaN	NaN
70	0.1	beta	4	2.02392	-7.53285	NaN	NaN	38.325	32.1037	NaN	NaN
80	0.1	beta	4	-0.467375	-9.26805	NaN	NaN	34.1676	29.9241	NaN	NaN
90	0.1	beta	4	0.175743	-8.90705	NaN	NaN	40.5237	30.6642	NaN	NaN
100	0.1	beta	4	-0.258782	-9.02361	NaN	NaN	31.7949	28.0476	NaN	NaN
5	0.2	beta	4	2.86173	-23.4922	NaN	NaN	137.181	100.074	NaN	NaN
10	0.2	beta	4	-4.52183	-19.2179	NaN	NaN	86.4498	67.5409	NaN	NaN
20	0.2	beta	4	-0.958406	-13.2455	NaN	NaN	70.3266	54.9199	NaN	NaN
30	0.2	beta	4	-0.327117	-11.4473	NaN	NaN	62.3095	47.4732	NaN	NaN
40	0.2	beta	4	-0.167397	-10.4746	NaN	NaN	46.4154	39.0479	NaN	NaN
50	0.2	beta	4	1.06478	-8.89201	NaN	NaN	44.2947	36.4418	NaN	NaN
60	0.2	beta	4	1.40086	-8.75232	NaN	NaN	48.307	36.5717	NaN	NaN
70	0.2	beta	4	-2.02545	-11.1166	NaN	NaN	39.0221	33.5827	NaN	NaN
80	0.2	beta	4	1.58228	-8.00354	NaN	NaN	41.1682	33.3809	NaN	NaN
90	0.2	beta	4	0.350151	-8.70078	NaN	NaN	34.3023	29.4195	NaN	NaN
100	0.2	beta	4	-0.932271	-9.40626	NaN	NaN	30.1554	27.1889	NaN	NaN
5	0.3	beta	4	-3.32721	-27.4378	NaN	NaN	121.994	83.8947	NaN	NaN
10	0.3	beta	4	1.9607	-16.8691	NaN	NaN	93.0448	68.8822	NaN	NaN
20	0.3	beta	4	0.62511	-12.743	NaN	NaN	72.4328	52.9534	NaN	NaN
30	0.3	beta	4	-0.14118	-11.4393	NaN	NaN	54.2839	44.9053	NaN	NaN
40	0.3	beta	4	-2.40529	-12.6387	NaN	NaN	50.5383	42.1525	NaN	NaN
50	0.3	beta	4	1.2018	-9.16866	NaN	NaN	53.0381	38.2367	NaN	NaN
60	0.3	beta	4	-2.86595	-12.0181	NaN	NaN	38.1088	34.2036	NaN	NaN
70	0.3	beta	4	-0.362902	-9.74591	NaN	NaN	39.5193	32.1925	NaN	NaN
80	0.3	beta	4	0.409868	-8.93202	NaN	NaN	37.5951	31.1972	NaN	NaN
90	0.3	beta	4	-1.30082	-10.2465	NaN	NaN	36.9025	30.3972	NaN	NaN
100	0.3	beta	4	-0.70763	-9.66869	NaN	NaN	33.2743	29.1678	NaN	NaN
5	0.4	beta	4	-9.053	-32.2138	NaN	NaN	107.081	80.9576	NaN	NaN
10	0.4	beta	4	4.28204	-16.169	NaN	NaN	108.133	72.1773	NaN	NaN
20	0.4	beta	4	-3.22626	-16.3377	NaN	NaN	66.4564	51.0899	NaN	NaN
30	0.4	beta	4	-2.80407	-14.2586	NaN	NaN	53.7147	45.4818	NaN	NaN
40	0.4	beta	4	-2.82046	-12.9023	NaN	NaN	45.4515	38.9889	NaN	NaN
50	0.4	beta	4	2.00574	-8.56115	NaN	NaN	44.7099	37.2377	NaN	NaN
60	0.4	beta	4	0.821244	-9.08128	NaN	NaN	41.5812	35.1968	NaN	NaN
70	0.4	beta	4	-0.551607	-9.67741	NaN	NaN	34.0103	30.1308	NaN	NaN
80	0.4	beta	4	-1.71775	-10.6315	NaN	NaN	32.8038	29.5656	NaN	NaN
90	0.4	beta	4	-0.373391	-9.43104	NaN	NaN	33.236	29.0687	NaN	NaN
100	0.4	beta	4	-0.379596	-9.18399	NaN	NaN	29.8667	27.0424	NaN	NaN
5	0.5	beta	4	6.88835	-24.447	NaN	NaN	167.231	103.086	NaN	NaN
10	0.5	beta	4	5.39763	-16.2587	NaN	NaN	102.172	71.2737	NaN	NaN
20	0.5	beta	4	-0.244213	-15.0627	NaN	NaN	66.7395	52.8755	NaN	NaN
30	0.5	beta	4	-3.15306	-14.9936	NaN	NaN	52.4081	44.181	NaN	NaN
40	0.5	beta	4	0.234095	-11.1865	NaN	NaN	51.712	41.1807	NaN	NaN
50	0.5	beta	4	0.0909167	-10.3923	NaN	NaN	41.0075	35.1698	NaN	NaN
60	0.5	beta	4	0.39754	-10.0705	NaN	NaN	41.3906	34.2649	NaN	NaN
70	0.5	beta	4	0.710232	-9.32096	NaN	NaN	39.0889	32.813	NaN	NaN
80	0.5	beta	4	1.03962	-8.64553	NaN	NaN	37.8767	31.5266	NaN	NaN
90	0.5	beta	4	1.75266	-7.77653	NaN	NaN	35.4088	29.3251	NaN	NaN
100	0.5	beta	4	0.844514	-8.27679	NaN	NaN	31.6682	27.732	NaN	NaN
5	0.6	beta	4	8.93167	-24.9818	NaN	NaN	198.636	88.3103	NaN	NaN
10	0.6	beta	4	1.56396	-20.9006	NaN	NaN	94.1153	69.449	NaN	NaN
20	0.6	beta	4	0.203255	-15.3784	NaN	NaN	62.9924	51.0742	NaN	NaN
30	0.6	beta	4	3.2118	-11.9873	NaN	NaN	78.0716	45.5474	NaN	NaN
40	0.6	beta	4	2.38708	-10.4789	NaN	NaN	54.5065	42.3187	NaN	NaN
50	0.6	beta	4	1.24766	-10.0159	NaN	NaN	43.1311	36.0664	NaN	NaN
60	0.6	beta	4	0.0261148	-10.505	NaN	NaN	38.9497	34.1352	NaN	NaN
70	0.6	beta	4	1.61446	-8.54517	NaN	NaN	37.4238	31.5392	NaN	NaN
80	0.6	beta	4	1.08615	-8.91368	NaN	NaN	35.0563	30.0824	NaN	NaN
90	0.6	beta	4	-0.200988	-9.6228	NaN	NaN	33.3195	29.3264	NaN	NaN
100	0.6	beta	4	1.07979	-8.34368	NaN	NaN	33.467	28.6033	NaN	NaN
5	0.7	beta	4	24.7652	-22.9847	NaN	NaN	174.471	81.8449	NaN	NaN
10	0.7	beta	4	7.46854	-21.714	NaN	NaN	104.363	68.1824	NaN	NaN
20	0.7	beta	4	-2.73276	-20.4373	NaN	NaN	66.3881	53.4614	NaN	NaN
30	0.7	beta	4	1.01817	-14.2883	NaN	NaN	57.3427	46.3324	NaN	NaN
40	0.7	beta	4	1.16924	-12.2132	NaN	NaN	50.1536	40.7179	NaN	NaN
50	0.7	beta	4	1.13531	-10.8851	NaN	NaN	42.1266	35.4358	NaN	NaN
60	0.7	beta	4	-1.35671	-12.5734	NaN	NaN	38.0486	33.1604	NaN	NaN
70	0.7	beta	4	1.43421	-9.8636	NaN	NaN	41.5513	33.1932	NaN	NaN
80	0.7	beta	4	0.336783	-9.97088	NaN	NaN	34.8666	30.3296	NaN	NaN
90	0.7	beta	4	2.20436	-7.96223	NaN	NaN	32.9585	28.6685	NaN	NaN
100	0.7	beta	4	2.18849	-7.86271	NaN	NaN	34.5262	28.8855	NaN	NaN
5	0.8	beta	4	40.8525	-7.25972	NaN	NaN	113.729	76.8052	NaN	NaN
10	0.8	beta	4	16.5539	-17.9665	NaN	NaN	103.266	68.6955	NaN	NaN
20	0.8	beta	4	2.37496	-21.5032	NaN	NaN	65.4134	54.3059	NaN	NaN
30	0.8	beta	4	3.0405	-16.2543	NaN	NaN	55.5378	48.3747	NaN	NaN
40	0.8	beta	4	4.07401	-13.0332	NaN	NaN	50.3419	39.781	NaN	NaN
50	0.8	beta	4	2.4749	-11.2004	NaN	NaN	40.3068	36.9941	NaN	NaN
60	0.8	beta	4	3.06696	-10.1265	NaN	NaN	41.8329	34.8882	NaN	NaN
70	0.8	beta	4	0.686385	-11.7582	NaN	NaN	38.7003	33.1354	NaN	NaN
80	0.8	beta	4	2.5195	-9.10398	NaN	NaN	36.9529	32.1813	NaN	NaN
90	0.8	beta	4	2.63706	-8.5142	NaN	NaN	30.8833	28.1286	NaN	NaN
100	0.8	beta	4	0.426467	-10.1703	NaN	NaN	26.4265	25.5354	NaN	NaN
5	0.9	beta	4	140.819	46.4507	NaN	NaN	217.665	123.089	NaN	NaN
10	0.9	beta	4	70.73	8.15145	NaN	NaN	120.726	75.3906	NaN	NaN
20	0.9	beta	4	28.5423	-11.8153	NaN	NaN	66.622	51.5463	NaN	NaN
30	0.9	beta	4	18.8917	-13.8699	NaN	NaN	57.1438	44.5443	NaN	NaN
40	0.9	beta	4	14.7077	-12.8986	NaN	NaN	50.997	43.0171	NaN	NaN
50	0.9	beta	4	11.5985	-11.5098	NaN	NaN	47.9767	38.4173	NaN	NaN
60	0.9	beta	4	7.70599	-12.1804	NaN	NaN	40.7427	36.5744	NaN	NaN
70	0.9	beta	4	10.6242	-10.2961	NaN	NaN	46.6503	36.236	NaN	NaN
80	0.9	beta	4	8.5326	-9.38742	NaN	NaN	35.0274	32.3912	NaN	NaN
90	0.9	beta	4	6.43582	-9.66373	NaN	NaN	33.0822	30.7185	NaN	NaN
100	0.9	beta	4	7.2593	-8.77624	NaN	NaN	33.2382	29.9575	NaN	NaN
5	0.1	beta	5	1.97791	-27.209	NaN	NaN	183.916	110.794	NaN	NaN
10	0.1	beta	5	4.80481	-17.5023	NaN	NaN	127.644	77.9389	NaN	NaN
20	0.1	beta	5	2.59746	-13.0257	NaN	NaN	84.5629	58.6636	NaN	NaN
30	0.1	beta	5	-0.72647	-16.2688	NaN	NaN	116.3	57.7086	NaN	NaN
40	0.1	beta	5	-1.82355	-13.9398	NaN	NaN	64.0093	47.1139	NaN	NaN
50	0.1	beta	5	-0.0328336	-12.5372	NaN	NaN	66.9633	45.0327	NaN	NaN
60	0.1	beta	5	-0.346818	-11.7175	NaN	NaN	55.2626	38.9094	NaN	NaN
70	0.1	beta	5	2.56579	-9.48116	NaN	NaN	53.9312	38.6203	NaN	NaN
80	0.1	beta	5	-0.129715	-11.0453	NaN	NaN	49.0883	36.252	NaN	NaN
90	0.1	beta	5	-0.743766	-11.1401	NaN	NaN	44.8352	34.5414	NaN	NaN
100	0.1	beta	5	-0.935154	-11.2238	NaN	NaN	41.6868	32.2572	NaN	NaN
5	0.2	beta	5	3.81626	-28.2765	NaN	NaN	176.649	113.309	NaN	NaN
10	0.2	beta	5	-4.26471	-23.7245	NaN	NaN	116.467	76.9864	NaN	NaN
20	0.2	beta	5	-1.72532	-16.9227	NaN	NaN	93.8041	61.9841	NaN	NaN
30	0.2	beta	5	-2.26644	-15.6082	NaN	NaN	78.4647	53.3062	NaN	NaN
40	0.2	beta	5	-0.637495	-13.2086	NaN	NaN	60.8569	44.745	NaN	NaN
50	0.2	beta	5	1.46343	-10.9434	NaN	NaN	62.1269	42.7331	NaN	NaN
60	0.2	beta	5	1.3954	-11.3856	NaN	NaN	71.4306	42.5882	NaN	NaN
70	0.2	beta	5	-1.52174	-13.2458	NaN	NaN	62.4411	40.1912	NaN	NaN
80	0.2	beta	5	3.5398	-9.21246	NaN	NaN	68.2901	42.1173	NaN	NaN
90	0.2	beta	5	1.45294	-10.3447	NaN	NaN	60.2796	37.6934	NaN	NaN
100	0.2	beta	5	-0.774662	-10.9148	NaN	NaN	43.4239	33.0326	NaN	NaN
5	0.3	beta	5	-4.95522	-33.3597	NaN	NaN	157.171	94.3819	NaN	NaN
10	0.3	beta	5	3.67997	-21.0455	NaN	NaN	131.439	75.1798	NaN	NaN
20	0.3	beta	5	0.25341	-16.6551	NaN	NaN	98.9075	58.3358	NaN	NaN
30	0.3	beta	5	-0.0941773	-14.1581	NaN	NaN	71.4891	51.478	NaN	NaN
40	0.3	beta	5	-4.19449	-16.4638	NaN	NaN	67.615	48.3065	NaN	NaN
50	0.3	beta	5	2.63017	-10.962	NaN	NaN	90.018	44.9005	NaN	NaN
60	0.3	beta	5	-3.35335	-14.2144	NaN	NaN	50.0625	39.6072	NaN	NaN
70	0.3	beta	5	-1.35443	-12.2667	NaN	NaN	48.6625	37.0288	NaN	NaN
80	0.3	beta	5	-0.318652	-11.2652	NaN	NaN	45.4356	35.1959	NaN	NaN
90	0.3	beta	5	-1.94875	-12.2314	NaN	NaN	44.4104	34.1341	NaN	NaN
100	0.3	beta	5	-0.214098	-11.1431	NaN	NaN	44.7556	34.2927	NaN	NaN
5	0.4	beta	5	-7.83657	-35.3853	NaN	NaN	136.568	89.7077	NaN	NaN
10	0.4	beta	5	4.43449	-20.9017	NaN	NaN	140.149	80.6374	NaN	NaN
20	0.4	beta	5	-3.36003	-20.4405	NaN	NaN	93.3863	56.6643	NaN	NaN
30	0.4	beta	5	-4.22681	-17.8919	NaN	NaN	68.0022	50.9844	NaN	NaN
40	0.4	beta	5	-2.34135	-14.9103	NaN	NaN	62.3073	45.4764	NaN	NaN
50	0.4	beta	5	1.41094	-11.8465	NaN	NaN	59.6621	42.948	NaN	NaN
60	0.4	beta	5	1.45409	-10.8521	NaN	NaN	58.2521	41.7657	NaN	NaN
70	0.4	beta	5	-0.157744	-11.1932	NaN	NaN	45.9032	35.4317	NaN	NaN
80	0.4	beta	5	-2.38643	-12.7974	NaN	NaN	43.3468	34.743	NaN	NaN
90	0.4	beta	5	-0.13713	-10.9325	NaN	NaN	45.7846	34.642	NaN	NaN
100	0.4	beta	5	-1.26969	-11.3695	NaN	NaN	39.6466	32.1127	NaN	NaN
5	0.5	beta	5	7.87216	-30.595	NaN	NaN	244.824	120.482	NaN	NaN
10	0.5	beta	5	3.32604	-22.7963	NaN	NaN	132.961	77.2119	NaN	NaN
20	0.5	beta	5	0.236512	-18.2777	NaN	NaN	89.4463	60.268	NaN	NaN
30	0.5	beta	5	-1.06427	-17.1714	NaN	NaN	79.1741	51.2539	NaN	NaN
40	0.5	beta	5	0.46007	-13.7002	NaN	NaN	72.8105	48.6523	NaN	NaN
50	0.5	beta	5	0.599355	-12.2275	NaN	NaN	56.9616	41.6237	NaN	NaN
60	0.5	beta	5	0.424438	-12.6215	NaN	NaN	56.802	39.4131	NaN	NaN
70	0.5	beta	5	1.17291	-11.2667	NaN	NaN	56.103	38.9927	NaN	NaN
80	0.5	beta	5	1.18947	-10.8147	NaN	NaN	55.0787	37.0641	NaN	NaN
90	0.5	beta	5	1.2843	-10.215	NaN	NaN	51.7791	35.4604	NaN	NaN
100	0.5	beta	5	1.76971	-9.72337	NaN	NaN	49.912	34.4468	NaN	NaN
5	0.6	beta	5	7.67992	-32.9201	NaN	NaN	334.883	94.6777	NaN	NaN
10	0.6	beta	5	1.35205	-25.195	NaN	NaN	123.852	75.4432	NaN	NaN
20	0.6	beta	5	-2.29467	-20.8299	NaN	NaN	77.8332	56.5149	NaN	NaN
30	0.6	beta	5	3.32634	-16.0696	NaN	NaN	133.328	51.7054	NaN	NaN
40	0.6	beta	5	1.7535	-13.9459	NaN	NaN	78.8395	47.6903	NaN	NaN
50	0.6	beta	5	-0.121977	-13.8589	NaN	NaN	57.3176	40.9632	NaN	NaN
60	0.6	beta	5	-0.422496	-13.1375	NaN	NaN	52.5195	39.7986	NaN	NaN
70	0.6	beta	5	0.139954	-11.9531	NaN	NaN	51.7204	36.6907	NaN	NaN
80	0.6	beta	5	0.756912	-11.422	NaN	NaN	47.153	34.5901	NaN	NaN
90	0.6	beta	5	0.313448	-10.8785	NaN	NaN	47.8313	34.9246	NaN	NaN
100	0.6	beta	5	0.593327	-10.3792	NaN	NaN	42.8648	32.8532	NaN	NaN
5	0.7	beta	5	27.5658	-29.2856	NaN	NaN	254.859	86.5287	NaN	NaN
10	0.7	beta	5	9.5286	-26.3067	NaN	NaN	155.892	73.8748	NaN	NaN
20	0.7	beta	5	-6.18828	-25.6954	NaN	NaN	89.6296	60.3285	NaN	NaN
30	0.7	beta	5	0.874751	-17.5412	NaN	NaN	76.2798	53.1818	NaN	NaN
40	0.7	beta	5	1.78449	-14.4028	NaN	NaN	70.0471	47.0259	NaN	NaN
50	0.7	beta	5	1.00601	-13.4198	NaN	NaN	60.6553	41.6558	NaN	NaN
60	0.7	beta	5	-2.24929	-15.7865	NaN	NaN	52.8885	38.0088	NaN	NaN
70	0.7	beta	5	1.13369	-12.5931	NaN	NaN	62.6981	39.4832	NaN	NaN
80	0.7	beta	5	-0.25308	-12.1446	NaN	NaN	49.3508	36.1207	NaN	NaN
90	0.7	beta	5	1.3931	-10.5543	NaN	NaN	45.9792	33.4748	NaN	NaN
100	0.7	beta	5	1.52507	-10.5242	NaN	NaN	51.5554	34.2057	NaN	NaN
5	0.8	beta	5	36.0223	-14.1986	NaN	NaN	145.518	82.3009	NaN	NaN
10	0.8	beta	5	16.6336	-19.6031	NaN	NaN	147.963	86.6868	NaN	NaN
20	0.8	beta	5	0.683009	-25.3518	NaN	NaN	91.242	59.5602	NaN	NaN
30	0.8	beta	5	1.72244	-20.1464	NaN	NaN	75.8343	54.5146	NaN	NaN
40	0.8	beta	5	4.52879	-16.0178	NaN	NaN	77.1286	46.2076	NaN	NaN
50	0.8	beta	5	1.05926	-14.3022	NaN	NaN	51.849	41.719	NaN	NaN
60	0.8	beta	5	2.35513	-12.416	NaN	NaN	58.2286	40.4197	NaN	NaN
70	0.8	beta	5	0.967908	-13.4837	NaN	NaN	56.9312	38.6356	NaN	NaN
80	0.8	beta	5	1.83774	-11.2011	NaN	NaN	54.7519	38.5712	NaN	NaN
90	0.8	beta	5	2.31273	-10.3851	NaN	NaN	44.3521	33.3708	NaN	NaN
100	0.8	beta	5	-1.76133	-12.7267	NaN	NaN	34.5245	29.4489	NaN	NaN
5	0.9	beta	5	150.347	45.8581	NaN	NaN	286.017	138.683	NaN	NaN
10	0.9	beta	5	65.9984	4.00874	NaN	NaN	150.316	81.535	NaN	NaN
20	0.9	beta	5	25.3818	-15.5005	NaN	NaN	80.8099	58.57	NaN	NaN
30	0.9	beta	5	15.7107	-18.5116	NaN	NaN	74.1098	51.0573	NaN	NaN
40	0.9	beta	5	9.26071	-17.5772	NaN	NaN	58.7441	47.0313	NaN	NaN
50	0.9	beta	5	8.10829	-15.321	NaN	NaN	67.6934	42.8299	NaN	NaN
60	0.9	beta	5	3.87799	-17.1537	NaN	NaN	60.8551	40.9519	NaN	NaN
70	0.9	beta	5	9.85816	-12.6717	NaN	NaN	70.1782	42.8214	NaN	NaN
80	0.9	beta	5	5.18066	-12.865	NaN	NaN	44.4441	36.9241	NaN	NaN
90	0.9	beta	5	2.96482	-12.8211	NaN	NaN	40.7834	35.0814	NaN	NaN
100	0.9	beta	5	4.54468	-12.0962	NaN	NaN	44.7341	34.5333	NaN	NaN
5	0.1	ml	2	NaN	32.1771	35.3358	-2.78014	75.3102	114.292	114.59	62.3232
10	0.1	ml	2	NaN	30.5632	26.2521	5.28838	58.7793	78.5751	73.7204	48.5054
20	0.1	ml	2	NaN	30.5819	23.0255	12.1262	46.616	60.6823	52.025	41.8793
30	0.1	ml	2	NaN	25.3755	17.4323	10.1552	37.0521	48.4071	40.1543	33.9784
40	0.1	ml	2	NaN	27.1882	18.736	13.1264	32.489	43.195	34.8096	30.1498
50	0.1	ml	2	NaN	28.0653	18.9951	14.2293	32.5765	43.2857	34.5072	30.4063
60	0.1	ml	2	NaN	27.0424	18.051	14.0607	29.0892	39.2155	30.6509	27.3151
70	0.1	ml	2	NaN	27.4355	18.2593	14.7493	27.9435	38.0447	29.3061	26.3364
80	0.1	ml	2	NaN	28.3744	19.1403	15.9876	27.5467	37.6613	28.7826	26.0207
90	0.1	ml	2	NaN	27.1771	18.002	15.1838	26.3683	36.1796	27.4402	24.997
100	0.1	ml	2	NaN	26.8312	17.5163	14.91	25.69	35.4441	26.6529	24.4017
5	0.2	ml	2	NaN	44.9481	252.998	-0.949319	325.496	155.748	3109.4	67.7268
10	0.2	ml	2	NaN	36.7886	31.8815	8.15917	64.7952	87.616	81.3959	53.2595
20	0.2	ml	2	NaN	34.7099	26.0563	13.0494	49.6254	64.7136	56.3385	42.8036
30	0.2	ml	2	NaN	34.8093	25.0867	16.0125	43.273	57.0563	47.4141	38.5758
40	0.2	ml	2	NaN	32.0773	22.3357	15.7064	36.6278	48.9676	39.4202	33.3903
50	0.2	ml	2	NaN	35.3127	24.761	19.0706	36.0537	48.753	38.4302	33.1055
60	0.2	ml	2	NaN	33.9921	23.6251	18.9283	33.8946	45.824	35.8148	31.4017
70	0.2	ml	2	NaN	32.1411	21.5516	17.4366	30.3263	42.1188	31.9274	28.1953
80	0.2	ml	2	NaN	33.2109	22.4904	18.8417	30.4334	42.1953	31.8533	28.5024
90	0.2	ml	2	NaN	34.442	23.5202	20.1246	30.7208	42.6087	32.027	28.8389
100	0.2	ml	2	NaN	32.7201	21.9046	18.8519	28.8224	40.3096	29.9593	27.1525
5	0.3	ml	2	NaN	49.3027	129.433	-0.874908	185.85	139.382	1722.37	62.2931
10	0.3	ml	2	NaN	39.781	37.7972	8.02844	68.8847	88.6707	93.5787	51.3885
20	0.3	ml	2	NaN	43.0093	34.1255	18.9231	53.7543	70.4469	61.843	45.1325
30	0.3	ml	2	NaN	38.9534	28.5118	18.3599	42.9707	57.6798	47.629	37.3752
40	0.3	ml	2	NaN	37.166	26.4236	18.6774	40.0781	53.7346	43.374	35.8155
50	0.3	ml	2	NaN	40.29	28.7267	22.2318	38.6571	52.6147	41.3415	35.1138
60	0.3	ml	2	NaN	36.9684	25.5411	20.1107	35.6416	48.7502	37.807	32.4881
70	0.3	ml	2	NaN	38.2979	26.608	21.8715	35.0646	48.1393	36.9241	32.3207
80	0.3	ml	2	NaN	38.2064	26.2975	22.0279	33.6318	46.6915	35.2524	31.1839
90	0.3	ml	2	NaN	37.8259	26.023	22.1974	32.4065	45.2682	33.8429	30.1688
100	0.3	ml	2	NaN	37.2591	25.385	21.8781	31.6311	44.3491	32.9167	29.5364
5	0.4	ml	2	NaN	34.3867	133.772	-7.39465	166.983	107.944	1205.4	56.0379
10	0.4	ml	2	NaN	42.8277	51.8108	9.47514	96.7399	92.5072	193.973	52.8777
20	0.4	ml	2	NaN	37.9154	30.3801	14.7311	50.0911	64.2295	58.1821	41.1553
30	0.4	ml	2	NaN	35.9225	26.4297	16.4893	41.8103	55.3995	46.1401	36.849
40	0.4	ml	2	NaN	35.3485	25.4175	18.113	37.3939	50.1417	40.474	33.6454
50	0.4	ml	2	NaN	38.2126	27.1933	20.8009	37.2609	50.3465	39.8838	33.7038
60	0.4	ml	2	NaN	37.1839	26.2638	20.9391	34.4317	47.0593	36.5687	31.4415
70	0.4	ml	2	NaN	37.1815	25.9502	21.3636	33.4347	46.0209	35.236	30.8726
80	0.4	ml	2	NaN	37.0337	25.571	21.4114	32.2966	44.8766	33.8891	29.895
90	0.4	ml	2	NaN	37.7325	26.1322	22.3253	32.22	44.9908	33.659	29.979
100	0.4	ml	2	NaN	37.7693	26.0258	22.4847	31.8873	44.5737	33.1888	29.7544
5	0.5	ml	2	NaN	27.8783	92.5856	0.150857	159.413	106.702	1015.74	58.0528
10	0.5	ml	2	NaN	24.4572	29.906	6.79054	60.931	69.4908	89.6502	45.7176
20	0.5	ml	2	NaN	21.7274	19.9931	9.86458	41.9746	51.3809	47.298	36.9996
30	0.5	ml	2	NaN	20.5998	16.9362	10.6808	33.2361	41.7017	35.9355	30.8277
40	0.5	ml	2	NaN	22.1869	17.4699	12.5062	30.6262	38.8886	32.7517	28.4906
50	0.5	ml	2	NaN	22.9897	18.1572	14.2055	27.8496	35.0921	29.4957	26.2994
60	0.5	ml	2	NaN	21.9109	16.7981	13.4736	25.6811	33.0501	27.0705	24.2369
70	0.5	ml	2	NaN	21.335	16.3554	13.5521	24.4134	31.3368	25.5697	23.2397
80	0.5	ml	2	NaN	22.3786	16.8839	14.3251	24.9756	32.179	26.0273	23.823
90	0.5	ml	2	NaN	22.3233	17.0139	14.7654	23.1347	29.7628	24.0704	22.1363
100	0.5	ml	2	NaN	21.6171	16.4082	14.3859	22.5114	28.9233	23.34	21.609
5	0.6	ml	2	NaN	12.0154	979.118	8.9521	1942.95	96.5523	28319	48.5648
10	0.6	ml	2	NaN	8.09728	25.2823	8.7185	55.5926	59.746	81.3014	44.3652
20	0.6	ml	2	NaN	6.44908	15.3053	9.55787	34.5189	39.499	37.4772	32.6626
30	0.6	ml	2	NaN	5.56649	13.4526	9.7822	27.1706	30.4081	28.9002	26.0018
40	0.6	ml	2	NaN	5.7136	13.653	10.983	24.6749	26.4973	25.9224	23.887
50	0.6	ml	2	NaN	6.32876	13.486	11.3324	22.8753	24.0391	23.8973	22.1984
60	0.6	ml	2	NaN	4.96254	12.4543	10.7021	21.2325	22.2046	22.0515	20.6896
70	0.6	ml	2	NaN	6.37956	13.9643	12.474	21.3735	20.3291	22.0947	20.9183
80	0.6	ml	2	NaN	6.03136	13.1174	11.7913	19.8403	19.2905	20.4791	19.4224
90	0.6	ml	2	NaN	4.82431	12.2591	11.1135	18.4108	17.2531	18.9542	18.0658
100	0.6	ml	2	NaN	5.93572	13.0531	11.9997	18.3556	16.843	18.874	18.0211
5	0.7	ml	2	NaN	10.1506	64.1642	27.6808	97.1657	85.6195	338.705	53.3768
10	0.7	ml	2	NaN	-0.390677	32.0355	16.5564	76.9435	54.1794	139.126	42.4217
20	0.7	ml	2	NaN	-1.96962	17.6849	13.2253	32.1432	33.6181	34.44	31.059
30	0.7	ml	2	NaN	-0.894241	16.8474	14.0813	28.6079	27.6462	29.9961	27.8936
40	0.7	ml	2	NaN	-0.163297	17.0441	15.0589	26.0937	24.4689	27.1668	25.5309
50	0.7	ml	2	NaN	0.589743	16.5989	14.9837	24.2359	21.2229	25.0804	23.8306
60	0.7	ml	2	NaN	0.22393	16.1588	14.8342	22.9091	19.9535	23.628	22.5456
70	0.7	ml	2	NaN	1.01949	16.6954	15.5524	22.3836	18.0495	23.0121	22.0717
80	0.7	ml	2	NaN	0.0544929	15.8901	14.9194	21.0913	16.777	21.6344	20.823
90	0.7	ml	2	NaN	0.929978	16.4554	15.5793	20.9109	15.5646	21.4082	20.666
100	0.7	ml	2	NaN	0.861803	16.4711	15.6855	20.6199	15.2588	21.0727	20.3947
5	0.8	ml	2	NaN	10.6856	70.7017	55.1532	73.1177	67.1287	101.052	67.3277
10	0.8	ml	2	NaN	1.50294	47.7761	34.3034	64.1875	47.6386	97.6222	50.4078
20	0.8	ml	2	NaN	-6.0571	25.5358	21.2828	39.0368	32.9172	41.0374	38.2656
30	0.8	ml	2	NaN	-3.01419	23.1259	20.49	34.6931	27.3546	35.7821	34.4009
40	0.8	ml	2	NaN	-1.79573	23.0914	21.2426	31.6466	23.1388	32.5365	31.3112
50	0.8	ml	2	NaN	-2.14989	21.5074	20.1356	29.3649	20.3076	30.0456	29.1367
60	0.8	ml	2	NaN	-2.43843	21.424	20.3178	28.4043	19.1077	28.9971	28.1605
70	0.8	ml	2	NaN	-3.44314	20.3214	19.4024	25.9572	17.1228	26.4584	25.7722
80	0.8	ml	2	NaN	-1.62164	22.2161	21.4009	26.6737	16.1366	27.1503	26.4866
90	0.8	ml	2	NaN	-2.03915	20.7646	20.0389	25.0273	15.0057	25.4474	24.8626
100	0.8	ml	2	NaN	-2.446	21.0933	20.4567	24.9795	14.2568	25.3549	24.8354
5	0.9	ml	2	NaN	38.7017	129.472	113.569	123.71	83.4255	138.886	119.954
10	0.9	ml	2	NaN	14.5066	85.3993	77.1199	92.1252	43.6309	97.3631	90.2806
20	0.9	ml	2	NaN	-0.70576	55.9647	51.313	71.0772	28.5472	73.9387	69.6211
30	0.9	ml	2	NaN	-2.05294	44.0832	41.7127	58.459	23.5837	59.1772	58.3573
40	0.9	ml	2	NaN	-4.08569	38.8866	36.8153	53.7998	23.843	54.3709	53.8494
50	0.9	ml	2	NaN	-3.35228	35.5515	34.2955	48.2947	20.7876	48.7259	48.2753
60	0.9	ml	2	NaN	-3.80279	31.1859	30.0542	43.9565	19.2701	44.3142	44.0092
70	0.9	ml	2	NaN	-2.77421	30.4166	29.4708	41.9739	18.278	42.3107	41.9175
80	0.9	ml	2	NaN	-2.80598	30.8445	30.016	40.7953	17.4397	41.1138	40.7635
90	0.9	ml	2	NaN	-2.81408	29.0751	28.4028	37.9905	15.33	38.2803	37.9266
100	0.9	ml	2	NaN	-2.51833	29.1793	28.582	37.7078	14.6535	37.9742	37.6429
5	0.1	ml	3	NaN	35.9	86.0515	-6.95563	160.398	186.675	368.819	89.4717
10	0.1	ml	3	NaN	24.8632	46.1266	4.06604	118.312	103.183	173.604	70.1146
20	0.1	ml	3	NaN	19.9482	30.9371	11.2169	73.6688	70.7514	84.8124	58.7567
30	0.1	ml	3	NaN	10.9141	19.6677	6.86924	54.7869	51.591	60.3269	45.8434
40	0.1	ml	3	NaN	12.2633	19.7989	10.2337	43.8487	41.7458	47.3307	38.3216
50	0.1	ml	3	NaN	13.5249	20.9196	12.4687	44.6285	41.49	47.5763	39.1333
60	0.1	ml	3	NaN	11.3227	18.2627	11.3007	37.6524	34.9396	39.8364	33.5469
70	0.1	ml	3	NaN	12.5911	19.3845	13.0579	36.0004	33.0511	37.918	32.1915
80	0.1	ml	3	NaN	12.4217	19.1256	13.4453	34.807	31.6555	36.4807	31.2288
90	0.1	ml	3	NaN	11.934	18.514	13.335	33.3658	30.1966	34.8256	30.097
100	0.1	ml	3	NaN	11.2126	17.6796	12.8476	32.6263	29.3755	33.9138	29.5517
5	0.2	ml	3	NaN	51.7314	10180.4	-3.66249	6303.42	280.775	202919	104.082
10	0.2	ml	3	NaN	24.1702	45.6201	2.99465	114	108.384	159.62	73.7054
20	0.2	ml	3	NaN	18.8301	30.9956	9.5833	76.7149	69.445	89.8853	57.391
30	0.2	ml	3	NaN	16.8978	26.8812	12.2216	62.2325	56.6248	69.0412	50.3073
40	0.2	ml	3	NaN	14.696	23.2298	12.3865	49.6482	45.9838	53.7726	42.2678
50	0.2	ml	3	NaN	16.7058	24.7008	15.5309	45.4113	41.8156	48.6373	39.3358
60	0.2	ml	3	NaN	14.7929	22.5358	14.7624	43.5196	38.9611	46.1539	37.6717
70	0.2	ml	3	NaN	12.2297	19.2511	12.6423	36.2517	33.1736	38.2231	32.1584
80	0.2	ml	3	NaN	14.0582	21.0456	14.9627	37.8672	34.2539	39.6732	33.7843
90	0.2	ml	3	NaN	14.2775	21.2074	15.5669	36.2904	32.4146	37.9039	32.4067
100	0.2	ml	3	NaN	13.609	20.3314	15.174	33.418	29.7759	34.8246	30.0148
5	0.3	ml	3	NaN	43.725	5512.05	-6.76372	4068.03	196.147	122698	85.3379
10	0.3	ml	3	NaN	25.7941	57.1783	3.46709	122.443	104.622	185.269	69.4592
20	0.3	ml	3	NaN	21.7288	35.5051	12.8002	78.6739	72.4644	91.9334	59.5585
30	0.3	ml	3	NaN	17.3523	27.5956	12.6128	58.4334	53.5209	65.0985	47.075
40	0.3	ml	3	NaN	13.5671	22.6152	11.3136	50.3244	45.9044	54.6052	42.2128
50	0.3	ml	3	NaN	17.8628	26.256	16.7081	47.1033	43.4143	50.4485	40.7809
60	0.3	ml	3	NaN	12.6269	20.479	12.6118	42.1828	38.1704	44.7278	36.6063
70	0.3	ml	3	NaN	14.6567	22.1982	15.1551	40.711	36.4895	42.91	35.6745
80	0.3	ml	3	NaN	14.5813	21.831	15.4582	37.8193	33.776	39.6949	33.41
90	0.3	ml	3	NaN	13.8425	20.9575	15.2319	35.3958	31.4183	37.0211	31.419
100	0.3	ml	3	NaN	12.5865	19.4818	14.2352	33.8433	29.9155	35.2566	30.1667
5	0.4	ml	3	NaN	24.8234	21774.2	-14.4523	14044.5	143.699	568647	72.0757
10	0.4	ml	3	NaN	28.5412	76.0911	5.90843	172.235	115.202	297.541	75.5497
20	0.4	ml	3	NaN	16.6562	31.7518	8.38097	76.6573	65.9644	91.2986	54.5258
30	0.4	ml	3	NaN	13.0569	24.0942	9.52095	58.8264	52.9142	65.6021	46.901
40	0.4	ml	3	NaN	13.1234	22.4478	11.7014	49.8125	45.2677	54.0475	41.7125
50	0.4	ml	3	NaN	14.4763	23.0699	13.7781	45.7814	41.2806	49.0385	39.1271
60	0.4	ml	3	NaN	13.0621	21.1847	13.5672	40.9683	36.861	43.4989	35.5026
70	0.4	ml	3	NaN	12.4024	19.6613	13.239	35.8948	32.5222	37.8588	31.8109
80	0.4	ml	3	NaN	11.7133	19.0424	13.1071	35.6805	31.6555	37.4407	31.3903
90	0.4	ml	3	NaN	12.2892	19.4673	14.0325	34.6142	30.8871	36.168	30.8334
100	0.4	ml	3	NaN	12.9984	20.0976	14.947	34.4305	30.477	35.8509	30.7716
5	0.5	ml	3	NaN	41.8318	5110.84	-3.50798	4525.64	205.961	107980	85.1974
10	0.5	ml	3	NaN	23.1097	112.331	5.08113	382.409	107.457	1253.02	72.0188
20	0.5	ml	3	NaN	14.2386	32.6345	8.27525	88.2287	69.05	107.193	57.4222
30	0.5	ml	3	NaN	9.1151	20.5646	7.13048	54.6635	49.3028	60.8813	43.7805
40	0.5	ml	3	NaN	10.5852	21.4262	10.1939	62.3374	46.5601	68.6792	44.0812
50	0.5	ml	3	NaN	10.1972	19.0675	10.8611	40.5273	36.9398	43.3836	34.9611
60	0.5	ml	3	NaN	9.19872	17.3751	10.5563	37.5649	34.1252	39.8092	32.8189
70	0.5	ml	3	NaN	8.85571	16.6838	10.7878	35.4478	32.4025	37.2692	31.557
80	0.5	ml	3	NaN	9.7589	17.2902	11.9525	34.7853	31.6739	36.3809	31.2421
90	0.5	ml	3	NaN	9.35438	16.6437	11.8424	31.2311	28.1934	32.6001	28.1683
100	0.5	ml	3	NaN	8.69544	15.8781	11.5318	30.109	27.0245	31.3155	27.2337
5	0.6	ml	3	NaN	31.1869	121262	-1.73577	73275.5	180.161	3.70087e+06	73.7526
10	0.6	ml	3	NaN	16.8316	320928	2.90304	877270	109.05	1.01353e+07	72.7445
20	0.6	ml	3	NaN	10.1397	39.1879	6.8131	209.312	65.5684	312.523	54.6635
30	0.6	ml	3	NaN	7.62346	20.9181	7.77789	57.2949	47.9631	64.5425	42.5227
40	0.6	ml	3	NaN	6.82116	17.9531	8.63328	45.9231	41.5381	49.8743	37.9946
50	0.6	ml	3	NaN	6.32052	16.1469	8.95071	40.0445	36.9538	42.7067	34.706
60	0.6	ml	3	NaN	4.59815	13.9258	7.81932	37.4112	34.4019	39.5078	32.6407
70	0.6	ml	3	NaN	5.85986	14.5669	9.5087	32.723	30.1695	34.3455	29.3836
80	0.6	ml	3	NaN	5.11536	13.4148	8.83029	30.9887	28.6612	32.3629	27.9721
90	0.6	ml	3	NaN	3.22978	11.2817	7.41659	27.1356	25.4167	28.2124	24.8486
100	0.6	ml	3	NaN	4.24664	12.1714	8.576	26.5141	24.5195	27.5184	24.3068
5	0.7	ml	3	NaN	42.7545	48580.8	12.8388	36590.3	243.6	1.26642e+06	82.9739
10	0.7	ml	3	NaN	12.3812	14958.6	6.89732	55650.9	114.878	391384	69.2134
20	0.7	ml	3	NaN	-0.56542	34.2833	2.68896	184.539	55.3652	343.656	45.9373
30	0.7	ml	3	NaN	0.330055	19.5364	4.84886	91.5057	44.834	114.046	39.7269
40	0.7	ml	3	NaN	1.24601	14.1352	6.31902	42.8277	39.7106	46.2591	35.9878
50	0.7	ml	3	NaN	1.65477	12.7406	6.89085	33.75	33.0186	35.7925	30.4419
60	0.7	ml	3	NaN	0.442819	11.507	6.36537	33.1782	31.1228	34.9897	29.1535
70	0.7	ml	3	NaN	2.004	12.3996	7.95368	30.5691	29.0787	32.015	27.7273
80	0.7	ml	3	NaN	0.315835	10.1725	6.4836	27.0387	26.0658	28.1509	24.8357
90	0.7	ml	3	NaN	1.8203	11.4898	8.05911	26.3408	24.9684	27.3701	24.2905
100	0.7	ml	3	NaN	1.22331	10.7827	7.74686	25.1613	24.1523	26.041	23.4262
5	0.8	ml	3	NaN	33.4232	540.714	38.1035	1098.37	147.653	10749.7	71.5079
10	0.8	ml	3	NaN	9.41572	6502.17	18.5422	28657.1	92.2404	175797	61.3479
20	0.8	ml	3	NaN	-3.57904	70.7236	7.82362	387.685	55.2241	663.636	45.7822
30	0.8	ml	3	NaN	-1.36702	23.9178	8.7921	64.931	45.0331	79.8609	40.2556
40	0.8	ml	3	NaN	-0.961579	18.8875	9.40679	55.0324	37.3327	63.6886	34.4428
50	0.8	ml	3	NaN	-1.17023	14.1848	8.58505	33.6458	32.5975	35.6783	30.3813
60	0.8	ml	3	NaN	-2.07548	12.6458	8.05862	34.0106	30.5707	35.8297	29.4278
70	0.8	ml	3	NaN	-4.11165	9.88184	6.19383	27.9613	27.069	29.1685	25.4132
80	0.8	ml	3	NaN	-1.4752	12.0496	8.84499	27.0899	25.8691	28.156	25.1248
90	0.8	ml	3	NaN	-1.9777	10.615	7.7537	23.5604	23.0496	24.4407	22.0186
100	0.8	ml	3	NaN	-2.49737	10.3353	7.73707	23.169	22.1872	23.962	21.4919
5	0.9	ml	3	NaN	90.164	277.212	119.862	287.5	214.492	865.929	138.178
10	0.9	ml	3	NaN	31.9138	232.653	72.5516	584.308	93.5693	1597.71	95.847
20	0.9	ml	3	NaN	1.90969	1033.24	37.3415	8665.91	48.6457	20260.5	62.991
30	0.9	ml	3	NaN	-0.746391	52.4449	28.2693	154.045	38.6268	202.856	51.1062
40	0.9	ml	3	NaN	-2.89008	184.427	23.7395	2475.35	38.9173	3857.83	48.6001
50	0.9	ml	3	NaN	-3.07715	26.3828	19.6171	45.1849	32.0883	48.0456	40.1844
60	0.9	ml	3	NaN	-3.65247	40.056	16.1488	432.546	30.497	568.804	37.3863
70	0.9	ml	3	NaN	-2.01074	22.0348	16.8799	38.4632	28.4943	40.0918	34.8229
80	0.9	ml	3	NaN	-2.52349	19.693	16.0611	34.0677	26.7372	35.0501	32.6107
90	0.9	ml	3	NaN	-3.36041	16.9476	13.8028	30.8782	23.7088	31.7317	29.2136
100	0.9	ml	3	NaN	-2.6466	17.0686	14.2513	29.6531	23.009	30.3516	28.6122
5	0.1	ml	4	NaN	58.6458	222.08	-8.18254	375.671	302.899	1241.97	121.618
10	0.1	ml	4	NaN	29.9497	84.3539	1.78828	270.985	137.887	484.951	91.0331
20	0.1	ml	4	NaN	19.7406	42.201	9.13779	109.398	83.0291	131.449	71.1527
30	0.1	ml	4	NaN	7.02779	23.0214	2.82365	74.0318	58.4785	82.964	54.951
40	0.1	ml	4	NaN	8.05641	21.3274	6.25446	56.1119	47.0014	61.0759	45.388
50	0.1	ml	4	NaN	10.058	23.7706	9.93626	58.3476	46.6103	62.6741	46.7713
60	0.1	ml	4	NaN	7.95487	20.348	8.94062	46.974	37.85	50.0325	38.5658
70	0.1	ml	4	NaN	9.48041	21.9953	11.2905	45.9495	36.6973	48.6184	38.0447
80	0.1	ml	4	NaN	8.82347	20.9681	11.2793	44.5186	35.0783	46.8129	36.9477
90	0.1	ml	4	NaN	7.96468	19.6054	10.843	40.8144	32.3275	42.7312	34.3092
100	0.1	ml	4	NaN	7.57115	19.322	10.8852	40.8794	32.06	42.6111	34.4161
5	0.2	ml	4	NaN	79.4842	1.27273e+08	-6.94048	9.44674e+06	488.345	4.01341e+09	131.05
10	0.2	ml	4	NaN	25.2078	73.2822	-1.83288	197.548	132.172	320.785	88.5978
20	0.2	ml	4	NaN	16.9299	42.8752	6.61774	125.617	83.0647	155.257	71.7458
30	0.2	ml	4	NaN	13.5724	32.2661	9.09143	87.0682	64.3499	98.4757	60.6276
40	0.2	ml	4	NaN	11.2599	27.2909	9.70967	66.3533	51.8662	72.6583	50.7242
50	0.2	ml	4	NaN	12.6821	27.1753	12.6758	57.2977	45.6793	61.7554	45.7118
60	0.2	ml	4	NaN	9.43353	23.1635	10.7464	55.2593	41.9622	58.9108	43.4227
70	0.2	ml	4	NaN	6.45847	18.7204	8.3471	43.7435	35.2754	46.2379	36.3592
80	0.2	ml	4	NaN	8.90643	21.4026	11.4767	46.8029	36.9675	49.1537	38.9317
90	0.2	ml	4	NaN	8.86877	21.2784	11.9618	44.1635	34.0005	46.2486	36.4417
100	0.2	ml	4	NaN	7.83529	19.5668	11.1756	38.7551	30.4224	40.4723	32.6133
5	0.3	ml	4	NaN	54.8848	2967.64	-12.5582	2199.77	267.835	47383	103.448
10	0.3	ml	4	NaN	30.0994	94.2256	0.946173	203.125	134.479	327.43	87.9747
20	0.3	ml	4	NaN	20.0693	48.8866	9.95189	137.864	92.077	168.53	79.9461
30	0.3	ml	4	NaN	14.1907	33.4441	9.74136	79.4271	61.1347	89.9035	56.9092
40	0.3	ml	4	NaN	8.72364	24.6513	7.38464	65.8859	51.3887	72.0919	50.2698
50	0.3	ml	4	NaN	12.502	27.5925	12.7187	58.9525	47.2088	63.4906	47.1469
60	0.3	ml	4	NaN	7.84208	21.6694	9.20444	54.2682	42.1563	57.7691	43.3705
70	0.3	ml	4	NaN	9.50582	22.9984	11.6355	50.4288	38.8335	53.3597	40.6858
80	0.3	ml	4	NaN	8.83383	21.7546	11.5061	45.2225	35.0732	47.6126	37.0712
90	0.3	ml	4	NaN	7.71219	20.1023	10.8645	42.6408	32.9039	44.6704	35.1897
100	0.3	ml	4	NaN	7.21366	19.6491	10.8099	43.1129	32.8272	44.9522	35.5794
5	0.4	ml	4	NaN	44.3415	4.89397e+06	-19.1906	827385	306.79	1.20656e+08	92.849
10	0.4	ml	4	NaN	32.531	146.136	3.06687	388.773	152.331	757.736	97.9692
20	0.4	ml	4	NaN	14.7591	50.5523	5.53492	196.52	78.4824	279.842	67.8253
30	0.4	ml	4	NaN	10.6903	31.5558	7.1306	84.9719	63.4398	96.0925	59.7289
40	0.4	ml	4	NaN	8.68216	25.0102	7.69371	67.5258	50.6742	74.164	49.7692
50	0.4	ml	4	NaN	10.5782	26.1851	11.022	61.4615	46.6896	66.3113	47.2807
60	0.4	ml	4	NaN	8.90063	22.923	10.5004	52.1399	40.4862	55.6299	41.5553
70	0.4	ml	4	NaN	7.56935	20.2794	9.68907	45.6288	35.7125	48.2997	37.1185
80	0.4	ml	4	NaN	6.65295	19.1902	9.44097	44.9134	34.6714	47.2199	36.6783
90	0.4	ml	4	NaN	6.70377	19.0021	9.94893	43.3121	33.2904	45.3323	35.5827
100	0.4	ml	4	NaN	7.12102	19.2809	10.7397	41.2453	31.8209	43.0247	34.265
5	0.5	ml	4	NaN	64.6675	763293	-9.01089	228205	327.144	2.04258e+07	107.764
10	0.5	ml	4	NaN	33.1415	1365.18	4.69205	4969.85	150.749	28022.9	97.0418
20	0.5	ml	4	NaN	14.9339	58.2096	6.50577	202.795	87.0126	276.678	76.012
30	0.5	ml	4	NaN	7.74175	29.356	4.97185	84.6383	59.745	96.4802	56.4855
40	0.5	ml	4	NaN	9.60837	29.8331	9.24362	106.322	56.7153	119.694	58.0126
50	0.5	ml	4	NaN	7.65054	23.3728	8.61427	58.6491	42.4744	63.5842	43.0899
60	0.5	ml	4	NaN	5.66539	19.9198	7.61664	52.9211	39.4635	56.5011	40.8007
70	0.5	ml	4	NaN	6.68399	20.4654	9.37635	50.2429	38.2642	53.1458	40.0696
80	0.5	ml	4	NaN	6.82208	19.6988	9.91872	46.9959	36.4598	49.3633	38.4414
90	0.5	ml	4	NaN	6.5337	18.7905	9.94081	41.9615	32.504	43.9347	34.6236
100	0.5	ml	4	NaN	5.64723	17.3673	9.32816	38.8775	29.9984	40.5635	32.2339
5	0.6	ml	4	NaN	53.9871	3.71152e+08	-8.33615	3.39271e+07	345.295	1.13576e+10	103.001
10	0.6	ml	4	NaN	28.3664	3.43341e+09	2.08941	2.97338e+09	169.019	1.08356e+11	106.276
20	0.6	ml	4	NaN	13.9323	92.0986	6.86609	566.508	86.4306	980.993	75.4744
30	0.6	ml	4	NaN	9.71455	38.986	8.00156	136.89	61.9206	164.888	59.634
40	0.6	ml	4	NaN	7.30466	30.5511	8.07206	115.869	52.2342	135.272	52.05
50	0.6	ml	4	NaN	7.09237	24.1944	8.93781	66.8566	46.8693	72.4271	47.8929
60	0.6	ml	4	NaN	4.77719	20.23	7.4091	59.1385	42.0237	63.1928	43.7011
70	0.6	ml	4	NaN	5.86289	19.3821	8.94493	48.7693	37.1586	51.6014	38.6745
80	0.6	ml	4	NaN	4.99512	18.6652	8.61708	49.5508	35.4622	52.1871	37.8726
90	0.6	ml	4	NaN	2.58927	14.5339	6.36565	38.9628	30.5791	40.7568	32.0626
100	0.6	ml	4	NaN	3.70091	15.3538	7.73085	38.5719	30.0154	40.1982	31.9309
5	0.7	ml	4	NaN	90.8608	1.18245e+08	5.55247	1.49072e+07	504.65	3.32635e+09	119.847
10	0.7	ml	4	NaN	27.1051	1.04663e+10	4.49146	8.30787e+09	192.395	3.2338e+11	96.4305
20	0.7	ml	4	NaN	2.56375	1573.84	-0.139185	12387	74.4787	33064.1	64.7698
30	0.7	ml	4	NaN	2.81518	46.9073	3.22525	412.031	58.1517	570.204	54.6809
40	0.7	ml	4	NaN	3.05706	27.9528	5.26503	118.664	51.6592	145.635	51.2794
50	0.7	ml	4	NaN	2.77935	19.701	5.60193	56.1711	41.2821	60.9451	41.0458
60	0.7	ml	4	NaN	0.707431	17.175	4.37358	64.1179	39.2845	69.1232	40.9384
70	0.7	ml	4	NaN	2.18579	16.8964	6.20261	50.0347	36.1105	53.0497	37.6853
80	0.7	ml	4	NaN	0.783551	13.5777	4.97918	41.8319	32.0869	43.9937	33.0761
90	0.7	ml	4	NaN	1.83901	14.1976	6.29114	40.0389	31.1831	41.8776	32.5226
100	0.7	ml	4	NaN	1.7369	13.7516	6.46445	37.5825	29.8157	39.1424	31.1602
5	0.8	ml	4	NaN	61.0494	72783.3	25.9092	53330.4	259.275	1.85858e+06	81.9845
10	0.8	ml	4	NaN	19.7205	89864.2	11.7057	225729	143.955	1.83051e+06	88.2636
20	0.8	ml	4	NaN	-0.113163	3563.39	2.71874	25613	74.7371	66325.1	62.9917
30	0.8	ml	4	NaN	1.40888	724.258	5.67717	9844.54	58.8151	19307.2	55.4304
40	0.8	ml	4	NaN	1.16193	53.7643	6.67438	546.985	48.2145	745.42	47.3327
50	0.8	ml	4	NaN	0.342799	20.4151	5.3812	60.9417	41.203	67.384	40.1585
60	0.8	ml	4	NaN	0.293694	19.3199	6.03929	74.5214	39.9293	80.9559	41.7517
70	0.8	ml	4	NaN	-2.56633	13.618	3.13898	52.4864	34.4756	56.1048	35.0116
80	0.8	ml	4	NaN	-1.24415	12.5147	4.62478	41.2398	33.0436	43.3252	33.0421
90	0.8	ml	4	NaN	-1.02179	12.1972	4.7589	36.2842	28.5308	38.0248	28.9184
100	0.8	ml	4	NaN	-2.48281	10.8274	3.60924	43.1225	27.2072	45.427	27.6059
5	0.9	ml	4	NaN	145.081	1739.87	118.4	1821.1	391.167	12684.9	160.876
10	0.9	ml	4	NaN	49.6704	8387.92	65.2143	23797.8	146.865	120321	107.375
20	0.9	ml	4	NaN	7.37114	1.27199e+06	28.6428	7.45928e+06	67.1903	2.85788e+07	65.5184
30	0.9	ml	4	NaN	1.76949	7.51123e+09	19.9658	5.98597e+10	51.2578	2.31755e+11	53.3933
40	0.9	ml	4	NaN	-0.791301	155403	16.6079	2.41508e+06	50.4357	4.8669e+06	53.3766
50	0.9	ml	4	NaN	-2.16439	43.8554	12.8238	246.541	40.7157	323.808	42.442
60	0.9	ml	4	NaN	-3.39773	38.2011	9.41853	296.443	37.7793	358.904	39.4483
70	0.9	ml	4	NaN	-1.34471	32.9774	11.6453	134.69	36.5267	156.251	39.1101
80	0.9	ml	4	NaN	-1.84236	21.6782	10.3997	56.6145	32.7547	61.4838	33.9744
90	0.9	ml	4	NaN	-2.87112	18.7676	8.13804	68.8264	30.248	74.9356	31.4667
100	0.9	ml	4	NaN	-1.98588	17.7059	8.79697	41.9877	29.1198	44.1336	30.5389
5	0.1	ml	5	NaN	80.1309	2.45732e+08	-12.7269	1.17758e+07	430.227	7.7746e+09	147.789
10	0.1	ml	5	NaN	40.598	167.563	1.2764	644.644	176.57	1371.36	109.185
20	0.1	ml	5	NaN	23.7926	61.4611	8.20026	168.337	100.219	211.136	85.1563
30	0.1	ml	5	NaN	8.13231	30.9081	0.741458	99.4623	67.5468	113.493	63.8872
40	0.1	ml	5	NaN	6.43461	23.8668	2.08486	68.1993	51.6738	74.9646	50.2231
50	0.1	ml	5	NaN	8.80277	27.0971	6.59821	71.2027	50.9889	77.0861	51.5884
60	0.1	ml	5	NaN	5.93629	21.6743	4.89209	56.1193	40.8627	60.1079	42.003
70	0.1	ml	5	NaN	7.9776	24.3179	8.10204	56.6869	41.0507	60.2071	42.9005
80	0.1	ml	5	NaN	7.46425	23.3564	8.34005	55.0465	39.0319	58.0863	41.5665
90	0.1	ml	5	NaN	6.47583	21.5254	7.82756	50.3472	35.9568	52.8633	38.5537
100	0.1	ml	5	NaN	6.43869	21.7392	8.39363	49.4424	34.8575	51.7146	37.8093
5	0.2	ml	5	NaN	121.663	2.67469e+10	-7.48583	5.49447e+08	1004.5	8.45789e+11	200.15
10	0.2	ml	5	NaN	32.9165	173.988	-4.4847	625.722	168.661	1433.88	106.076
20	0.2	ml	5	NaN	18.7392	57.3982	4.07392	177.96	101.044	223.403	87.0185
30	0.2	ml	5	NaN	12.3466	38.7854	4.89727	113.967	70.7803	131.541	67.0405
40	0.2	ml	5	NaN	11.3662	33.9159	7.38563	88.0127	59.6551	97.4168	59.0606
50	0.2	ml	5	NaN	11.8623	31.5727	9.78387	71.2811	50.5506	77.4082	51.0451
60	0.2	ml	5	NaN	7.47452	25.6769	6.87823	72.2192	46.4834	77.588	48.888
70	0.2	ml	5	NaN	4.84342	21.0524	5.06665	54.2281	38.387	57.6504	40.2915
80	0.2	ml	5	NaN	7.34518	23.4948	8.32062	56.5624	40.5708	59.6199	43.1122
90	0.2	ml	5	NaN	6.29357	22.1196	7.87446	52.977	36.6624	55.6429	39.6578
100	0.2	ml	5	NaN	5.02409	19.4152	6.78567	44.4336	32.333	46.5009	34.6556
5	0.3	ml	5	NaN	76.4004	1.43179e+11	-17.7586	2.33784e+09	375.162	4.52998e+12	119.998
10	0.3	ml	5	NaN	37.8722	236.327	-1.45071	935.154	163.799	2520.03	100.981
20	0.3	ml	5	NaN	20.9381	67.3893	6.34645	210.81	105.902	269.633	91.6649
30	0.3	ml	5	NaN	14.8953	42.6882	7.41742	107.344	70.693	123.262	66.3864
40	0.3	ml	5	NaN	6.26161	27.6079	2.57944	81.1724	55.1704	89.8701	54.6591
50	0.3	ml	5	NaN	11.6797	32.5748	9.90812	77.088	53.0676	83.7454	53.8858
60	0.3	ml	5	NaN	6.92253	25.9535	6.58895	71.9199	47.8868	77.0859	50.4348
70	0.3	ml	5	NaN	7.41536	25.0041	7.86773	62.1881	42.8927	66.0728	45.4117
80	0.3	ml	5	NaN	6.25221	22.6523	7.32183	53.4574	37.4151	56.4863	39.8934
90	0.3	ml	5	NaN	5.67186	21.3459	7.25041	50.581	35.2829	53.1604	38.057
100	0.3	ml	5	NaN	6.20268	22.7745	8.55303	54.8361	36.8197	57.3407	40.6426
5	0.4	ml	5	NaN	69.8341	8.46544e+06	-21.5876	1.02444e+06	475.845	1.62242e+08	104.375
10	0.4	ml	5	NaN	42.7167	610.073	1.59211	3332.77	199.122	10201.9	117.908
20	0.4	ml	5	NaN	16.127	82.6173	2.60367	347.773	90.4631	514.607	78.3468
30	0.4	ml	5	NaN	10.2604	42.3857	3.81091	125.664	71.7105	146.166	68.8252
40	0.4	ml	5	NaN	9.75901	36.3466	6.48253	130.086	62.7861	147.482	64.1679
50	0.4	ml	5	NaN	8.63366	30.6131	7.18136	79.4902	51.7078	86.573	53.2135
60	0.4	ml	5	NaN	7.36029	25.9677	6.98939	65.9192	44.8602	70.7597	46.7935
70	0.4	ml	5	NaN	6.70513	23.715	7.07926	58.3538	40.2077	62.0842	42.427
80	0.4	ml	5	NaN	5.38867	22.0031	6.57793	58.2668	39.5492	61.4856	42.5926
90	0.4	ml	5	NaN	5.47576	21.6889	7.21954	56.5272	37.7483	59.3536	41.2414
100	0.4	ml	5	NaN	4.80094	20.0299	6.8584	49.2506	34.7014	51.4843	37.655
5	0.5	ml	5	NaN	93.9531	7.8172e+07	-12.9742	8.16346e+06	501.512	2.30151e+09	131.716
10	0.5	ml	5	NaN	39.6287	17660.5	0.305136	51720.2	190.243	448254	115.042
20	0.5	ml	5	NaN	19.4893	113.991	6.13017	522.246	107.712	804.256	93.5767
30	0.5	ml	5	NaN	10.7916	61.1184	5.18208	350.904	75.6658	447.717	74.7481
40	0.5	ml	5	NaN	9.27447	40.9996	6.28342	192.987	61.5638	226.233	63.6411
50	0.5	ml	5	NaN	7.05807	28.3854	5.71658	76.5281	47.3179	83.732	48.7395
60	0.5	ml	5	NaN	5.20253	26.1776	5.37338	78.4063	45.4519	84.6085	48.8529
70	0.5	ml	5	NaN	6.54937	25.8527	7.55482	66.7796	43.1676	71.0984	46.4
80	0.5	ml	5	NaN	6.3005	24.0598	7.83701	60.3887	40.3869	63.7865	43.6041
90	0.5	ml	5	NaN	4.2352	19.8043	5.91052	50.571	35.136	53.1296	37.8218
100	0.5	ml	5	NaN	4.61067	20.0763	6.75898	49.5748	33.54	51.8971	36.7069
5	0.6	ml	5	NaN	79.4314	4.91737e+11	-15.9912	8.56039e+09	610.715	1.51048e+13	138.206
10	0.6	ml	5	NaN	42.0588	1.48401e+13	2.04078	4.69155e+12	242.154	468579530411437	140.483
20	0.6	ml	5	NaN	16.0889	138.81	4.29916	656.772	100.722	1027.94	87.8696
30	0.6	ml	5	NaN	8.74867	48.5189	3.51195	157.81	68.0155	190.608	65.601
40	0.6	ml	5	NaN	7.60908	38.8251	5.57638	117.106	60.594	132.771	61.3978
50	0.6	ml	5	NaN	8.19854	36.8527	8.07376	114.375	55.842	126.318	59.7389
60	0.6	ml	5	NaN	5.11488	27.6333	5.80851	86.3013	49.4016	93.0875	53.0984
70	0.6	ml	5	NaN	5.16458	24.2516	6.30766	65.8158	41.5691	70.1857	44.5622
80	0.6	ml	5	NaN	4.94075	25.4061	7.01769	78.1385	40.2529	83.2699	44.854
90	0.6	ml	5	NaN	3.14742	19.5619	5.12367	55.01	35.0609	57.9113	38.2269
100	0.6	ml	5	NaN	3.90456	20.1921	6.30821	55.0114	34.4675	57.633	38.2675
5	0.7	ml	5	NaN	147.181	1.51633e+11	1.02354	3.71208e+09	877.992	4.34289e+12	154.361
10	0.7	ml	5	NaN	44.3897	117715984725133	2.79272	3.08366e+13	298.271	3651237207993810	118.301
20	0.7	ml	5	NaN	3.99948	69496.4	-4.62641	429093	87.2544	1.49944e+06	75.662
30	0.7	ml	5	NaN	5.00742	79.6224	1.36154	386.476	68.9288	513.371	67.0958
40	0.7	ml	5	NaN	5.67446	63.6264	4.62197	496.953	61.9781	687.16	64.2371
50	0.7	ml	5	NaN	3.69366	31.2853	3.78893	98.7997	47.5623	110.54	49.3608
60	0.7	ml	5	NaN	1.84933	29.9075	3.33323	127.262	46.2872	140.146	51.2909
70	0.7	ml	5	NaN	2.48069	24.7296	4.37261	82.2438	42.3046	88.3519	46.5265
80	0.7	ml	5	NaN	1.72552	19.8544	3.66969	66.3364	37.9301	70.5786	40.95
90	0.7	ml	5	NaN	1.46165	18.1094	3.76834	56.805	35.6195	59.7967	38.8294
100	0.7	ml	5	NaN	2.20568	19.0902	5.08018	53.9342	34.8127	56.4705	38.2372
5	0.8	ml	5	NaN	95.6254	7.66457e+06	14.9811	1.85477e+06	421.118	1.96159e+08	92.5412
10	0.8	ml	5	NaN	32.6983	7.40193e+06	8.7703	1.40511e+07	189.373	2.18822e+08	114.123
20	0.8	ml	5	NaN	3.77138	216624	-0.969789	1.36503e+06	93.94	4.93765e+06	80.3181
30	0.8	ml	5	NaN	3.94738	46057.7	3.34677	571388	69.528	1.37498e+06	67.5637
40	0.8	ml	5	NaN	3.44692	74.6783	5.1319	364.572	60.6754	462.221	62.4276
50	0.8	ml	5	NaN	1.62737	36.6831	3.24878	135.304	47.4217	159.251	48.0872
60	0.8	ml	5	NaN	1.45788	31.6257	3.80358	156.633	45.5914	175.251	49.3614
70	0.8	ml	5	NaN	-1.2761	27.7055	1.3603	157.946	39.9532	176.495	43.0763
80	0.8	ml	5	NaN	-0.57399	17.9643	2.1131	63.9953	38.1999	68.1613	40.175
90	0.8	ml	5	NaN	-0.313404	17.6489	2.83973	56.8418	33.2218	60.0604	35.9314
100	0.8	ml	5	NaN	-2.28931	14.932	0.839372	65.25	30.6705	69.2804	32.922
5	0.9	ml	5	NaN	220.851	18440.6	113.536	12009.7	622.111	162336	185.495
10	0.9	ml	5	NaN	64.037	57465.2	57.0447	175863	204.504	1.28571e+06	126.594
20	0.9	ml	5	NaN	12.1223	9.3174e+08	21.6091	4.57228e+09	83.4531	2.75996e+10	72.7062
30	0.9	ml	5	NaN	2.9153	366147238279851	13.0671	1866017123284180	61.3486	1.13091e+16	58.7892
40	0.9	ml	5	NaN	-0.711473	5174.39	9.76879	86838.8	56.2353	138658	57.0292
50	0.9	ml	5	NaN	-1.37651	70.6708	7.74481	515.883	47.4178	657.036	48.8
60	0.9	ml	5	NaN	-4.03095	298.685	3.43499	3913.08	43.1696	5019.37	44.2918
70	0.9	ml	5	NaN	-0.191101	99.1698	8.17429	1126.83	43.4471	1408.68	46.828
80	0.9	ml	5	NaN	-1.84749	30.2201	5.64783	96.7604	37.1339	105.282	38.4776
90	0.9	ml	5	NaN	-2.98148	26.5458	3.67552	107.113	34.7845	116.901	36.1273
100	0.9	ml	5	NaN	-2.06343	25.8142	4.52526	86.0453	33.3888	92.433	35.2289
5	0.1	km	2	3.66417	NaN	NaN	NaN	60.6382	NaN	NaN	NaN
10	0.1	km	2	1.45101	NaN	NaN	NaN	40.028	NaN	NaN	NaN
20	0.1	km	2	2.05703	28.1965	NaN	NaN	29.9231	64.8043	NaN	NaN
30	0.1	km	2	-1.18175	19.7039	NaN	NaN	23.9889	47.1688	NaN	NaN
40	0.1	km	2	0.653047	11.5205	NaN	NaN	19.9749	33.7989	NaN	NaN
50	0.1	km	2	0.393762	10.568	NaN	NaN	18.9817	30.707	NaN	NaN
60	0.1	km	2	0.118827	8.05646	NaN	NaN	16.5521	26.0785	NaN	NaN
70	0.1	km	2	0.551439	8.43125	NaN	NaN	15.6004	24.668	NaN	NaN
80	0.1	km	2	0.778053	5.55886	NaN	NaN	14.434	21.3028	NaN	NaN
90	0.1	km	2	0.219878	5.41287	NaN	NaN	13.7412	20.3188	NaN	NaN
100	0.1	km	2	-0.144655	4.61926	NaN	NaN	13.4522	19.7007	NaN	NaN
5	0.2	km	2	8.32235	NaN	NaN	NaN	67.892	NaN	NaN	NaN
10	0.2	km	2	2.57593	NaN	NaN	NaN	42.2811	NaN	NaN	NaN
20	0.2	km	2	0.909956	27.4451	NaN	NaN	29.915	65.9474	NaN	NaN
30	0.2	km	2	0.591748	20.8416	NaN	NaN	24.3772	46.916	NaN	NaN
40	0.2	km	2	0.195487	13.1502	NaN	NaN	20.4508	36.996	NaN	NaN
50	0.2	km	2	1.46769	10.3863	NaN	NaN	18.45	29.0361	NaN	NaN
60	0.2	km	2	1.44999	7.82159	NaN	NaN	16.9642	26.3339	NaN	NaN
70	0.2	km	2	-0.23216	5.7966	NaN	NaN	15.0989	22.774	NaN	NaN
80	0.2	km	2	0.888179	4.53993	NaN	NaN	14.743	22.3357	NaN	NaN
90	0.2	km	2	1.22567	4.92104	NaN	NaN	13.8045	19.6632	NaN	NaN
100	0.2	km	2	0.320681	3.36573	NaN	NaN	13.0775	17.6937	NaN	NaN
5	0.3	km	2	16.0106	NaN	NaN	NaN	65.9822	NaN	NaN	NaN
10	0.3	km	2	5.66941	NaN	NaN	NaN	41.3477	NaN	NaN	NaN
20	0.3	km	2	5.03523	26.7747	NaN	NaN	29.4642	61.0505	NaN	NaN
30	0.3	km	2	2.25301	21.3584	NaN	NaN	22.3407	46.3906	NaN	NaN
40	0.3	km	2	1.50564	11.4875	NaN	NaN	20.8274	37.0248	NaN	NaN
50	0.3	km	2	3.1963	11.6431	NaN	NaN	18.5328	30.7949	NaN	NaN
60	0.3	km	2	1.1012	6.38062	NaN	NaN	16.4061	26.1194	NaN	NaN
70	0.3	km	2	2.13784	6.96818	NaN	NaN	15.6619	23.3233	NaN	NaN
80	0.3	km	2	2.12673	6.13115	NaN	NaN	14.7259	21.9214	NaN	NaN
90	0.3	km	2	2.08045	4.38692	NaN	NaN	13.6648	19.0141	NaN	NaN
100	0.3	km	2	1.60381	3.7884	NaN	NaN	13.0324	19.2666	NaN	NaN
5	0.4	km	2	25.3096	NaN	NaN	NaN	72.8174	NaN	NaN	NaN
10	0.4	km	2	17.0927	NaN	NaN	NaN	49.0537	NaN	NaN	NaN
20	0.4	km	2	7.83653	25.1799	NaN	NaN	29.7891	65.3056	NaN	NaN
30	0.4	km	2	5.96612	21.4533	NaN	NaN	24.4142	47.1205	NaN	NaN
40	0.4	km	2	5.67287	9.75465	NaN	NaN	20.8423	33.7369	NaN	NaN
50	0.4	km	2	6.43558	11.4622	NaN	NaN	19.2111	29.1714	NaN	NaN
60	0.4	km	2	5.89205	7.47978	NaN	NaN	17.2511	26.3291	NaN	NaN
70	0.4	km	2	5.98124	7.6867	NaN	NaN	16.2897	23.592	NaN	NaN
80	0.4	km	2	5.27452	4.81545	NaN	NaN	14.8659	21.3879	NaN	NaN
90	0.4	km	2	5.65807	5.17234	NaN	NaN	14.5829	20.8101	NaN	NaN
100	0.4	km	2	5.53014	5.15275	NaN	NaN	13.8829	19.6235	NaN	NaN
5	0.5	km	2	55.8319	NaN	NaN	NaN	98.4383	NaN	NaN	NaN
10	0.5	km	2	35.6237	NaN	NaN	NaN	58.7605	NaN	NaN	NaN
20	0.5	km	2	23.3749	27.1561	NaN	NaN	37.743	63.5002	NaN	NaN
30	0.5	km	2	19.4867	20.498	NaN	NaN	30.1474	45.7701	NaN	NaN
40	0.5	km	2	18.7568	13.6247	NaN	NaN	27.3916	36.1019	NaN	NaN
50	0.5	km	2	18.9395	11.5121	NaN	NaN	25.605	28.9966	NaN	NaN
60	0.5	km	2	17.5206	8.58155	NaN	NaN	23.5042	27.9828	NaN	NaN
70	0.5	km	2	16.7541	7.27402	NaN	NaN	22.2118	23.6892	NaN	NaN
80	0.5	km	2	16.8383	6.44699	NaN	NaN	22.1933	22.8242	NaN	NaN
90	0.5	km	2	16.975	6.18775	NaN	NaN	21.1041	20.2295	NaN	NaN
100	0.5	km	2	16.3766	4.79848	NaN	NaN	20.4759	18.715	NaN	NaN
5	0.6	km	2	91.5035	NaN	NaN	NaN	154.773	NaN	NaN	NaN
10	0.6	km	2	65.3895	NaN	NaN	NaN	89.8293	NaN	NaN	NaN
20	0.6	km	2	46.1005	28.7384	NaN	NaN	53.8714	64.4036	NaN	NaN
30	0.6	km	2	41.7925	22.1297	NaN	NaN	47.1072	49.9533	NaN	NaN
40	0.6	km	2	39.786	12.8456	NaN	NaN	43.7253	36.5626	NaN	NaN
50	0.6	km	2	39.0622	11.2965	NaN	NaN	42.2851	30.2302	NaN	NaN
60	0.6	km	2	37.4939	7.06231	NaN	NaN	40.2989	26.9564	NaN	NaN
70	0.6	km	2	38.1061	7.94041	NaN	NaN	40.454	24.0257	NaN	NaN
80	0.6	km	2	37.0882	6.64535	NaN	NaN	39.1671	22.8811	NaN	NaN
90	0.6	km	2	36.0928	4.721	NaN	NaN	37.9294	19.652	NaN	NaN
100	0.6	km	2	36.6843	4.39433	NaN	NaN	38.3294	18.336	NaN	NaN
5	0.7	km	2	129.572	NaN	NaN	NaN	177.501	NaN	NaN	NaN
10	0.7	km	2	100.502	NaN	NaN	NaN	125.964	NaN	NaN	NaN
20	0.7	km	2	76.5698	25.9221	NaN	NaN	84.2499	62.4367	NaN	NaN
30	0.7	km	2	70.2363	22.683	NaN	NaN	73.7277	48.3893	NaN	NaN
40	0.7	km	2	67.6355	12.7576	NaN	NaN	70.1046	36.8639	NaN	NaN
50	0.7	km	2	66.2306	11.1482	NaN	NaN	68.0313	29.7317	NaN	NaN
60	0.7	km	2	64.8171	8.14229	NaN	NaN	66.3699	26.3484	NaN	NaN
70	0.7	km	2	64.4827	8.22748	NaN	NaN	65.7821	23.7962	NaN	NaN
80	0.7	km	2	63.2385	5.89416	NaN	NaN	64.3541	21.7964	NaN	NaN
90	0.7	km	2	63.2368	6.17973	NaN	NaN	64.1489	20.2456	NaN	NaN
100	0.7	km	2	63.0431	5.28011	NaN	NaN	63.9376	19.7249	NaN	NaN
5	0.8	km	2	176.884	NaN	NaN	NaN	209.055	NaN	NaN	NaN
10	0.8	km	2	162.996	NaN	NaN	NaN	196.06	NaN	NaN	NaN
20	0.8	km	2	129.94	25.296	NaN	NaN	140.822	63.1272	NaN	NaN
30	0.8	km	2	120.183	23.3996	NaN	NaN	125.642	48.7837	NaN	NaN
40	0.8	km	2	112.744	13.0408	NaN	NaN	115.29	35.1451	NaN	NaN
50	0.8	km	2	109.124	11.8786	NaN	NaN	110.437	29.4614	NaN	NaN
60	0.8	km	2	106.576	7.98335	NaN	NaN	107.592	27.5096	NaN	NaN
70	0.8	km	2	104.123	5.26191	NaN	NaN	104.935	21.8295	NaN	NaN
80	0.8	km	2	103.796	5.58582	NaN	NaN	104.509	21.7455	NaN	NaN
90	0.8	km	2	102.833	4.76444	NaN	NaN	103.409	19.2777	NaN	NaN
100	0.8	km	2	102.127	3.89163	NaN	NaN	102.597	18.5288	NaN	NaN
5	0.9	km	2	291.845	NaN	NaN	NaN	327.516	NaN	NaN	NaN
10	0.9	km	2	269.42	NaN	NaN	NaN	297.139	NaN	NaN	NaN
20	0.9	km	2	242.347	33.533	NaN	NaN	265.321	63.3353	NaN	NaN
30	0.9	km	2	221.249	25.3199	NaN	NaN	231.628	45.1137	NaN	NaN
40	0.9	km	2	212.682	12.7407	NaN	NaN	225.925	35.426	NaN	NaN
50	0.9	km	2	200.271	10.8882	NaN	NaN	205.287	28.4721	NaN	NaN
60	0.9	km	2	195.983	7.40883	NaN	NaN	201.314	25.3274	NaN	NaN
70	0.9	km	2	190.632	7.74765	NaN	NaN	192.829	24.3091	NaN	NaN
80	0.9	km	2	188.012	5.94067	NaN	NaN	189.481	21.7222	NaN	NaN
90	0.9	km	2	185.672	5.18967	NaN	NaN	186.773	19.2659	NaN	NaN
100	0.9	km	2	183.272	4.52037	NaN	NaN	184.009	18.7226	NaN	NaN
5	0.1	km	3	3.30788	NaN	NaN	NaN	97.8264	NaN	NaN	NaN
10	0.1	km	3	2.44318	NaN	NaN	NaN	66.8214	NaN	NaN	NaN
20	0.1	km	3	2.65158	63.8372	NaN	NaN	47.4043	142.103	NaN	NaN
30	0.1	km	3	-2.45911	44.5557	NaN	NaN	40.6379	109.232	NaN	NaN
40	0.1	km	3	0.0571548	22.2952	NaN	NaN	32.4538	59.2286	NaN	NaN
50	0.1	km	3	0.542399	21.7109	NaN	NaN	31.734	57.0083	NaN	NaN
60	0.1	km	3	-0.642807	14.3878	NaN	NaN	25.921	43.3898	NaN	NaN
70	0.1	km	3	0.983309	16.1887	NaN	NaN	25.3991	43.4212	NaN	NaN
80	0.1	km	3	-0.0806448	10.5035	NaN	NaN	23.2407	36.5655	NaN	NaN
90	0.1	km	3	0.298899	10.6671	NaN	NaN	23.6326	35.1972	NaN	NaN
100	0.1	km	3	-0.411846	8.31763	NaN	NaN	21.7317	32.5086	NaN	NaN
5	0.2	km	3	7.96996	NaN	NaN	NaN	102.98	NaN	NaN	NaN
10	0.2	km	3	0.0898796	NaN	NaN	NaN	64.9994	NaN	NaN	NaN
20	0.2	km	3	0.457901	59.5581	NaN	NaN	48.0872	149.472	NaN	NaN
30	0.2	km	3	0.273006	47.2117	NaN	NaN	40.56	107.164	NaN	NaN
40	0.2	km	3	0.66262	28.068	NaN	NaN	32.8901	71.5268	NaN	NaN
50	0.2	km	3	1.52454	22.1097	NaN	NaN	29.5825	54.0644	NaN	NaN
60	0.2	km	3	1.58834	16.2445	NaN	NaN	28.2058	47.8556	NaN	NaN
70	0.2	km	3	-0.668606	12.2087	NaN	NaN	25.5355	39.7297	NaN	NaN
80	0.2	km	3	1.48292	10.1919	NaN	NaN	25.6306	38.9091	NaN	NaN
90	0.2	km	3	0.976286	9.59877	NaN	NaN	23.0711	33.7008	NaN	NaN
100	0.2	km	3	0.499661	7.71888	NaN	NaN	20.9673	29.9124	NaN	NaN
5	0.3	km	3	11.8631	NaN	NaN	NaN	97.9907	NaN	NaN	NaN
10	0.3	km	3	5.16589	NaN	NaN	NaN	64.145	NaN	NaN	NaN
20	0.3	km	3	3.6285	57.7864	NaN	NaN	46.2818	131.75	NaN	NaN
30	0.3	km	3	2.1166	48.6581	NaN	NaN	36.9198	100.895	NaN	NaN
40	0.3	km	3	0.0915887	23.568	NaN	NaN	33.8143	70.9976	NaN	NaN
50	0.3	km	3	3.65395	23.5269	NaN	NaN	31.6784	55.986	NaN	NaN
60	0.3	km	3	-0.0752712	12.7335	NaN	NaN	27.4028	45.9827	NaN	NaN
70	0.3	km	3	1.63793	13.7687	NaN	NaN	26.1106	41.0892	NaN	NaN
80	0.3	km	3	2.29525	11.611	NaN	NaN	24.4767	37.8617	NaN	NaN
90	0.3	km	3	1.22262	8.75194	NaN	NaN	22.6086	32.4223	NaN	NaN
100	0.3	km	3	0.811227	7.54125	NaN	NaN	21.2812	32.4044	NaN	NaN
5	0.4	km	3	19.3925	NaN	NaN	NaN	104.251	NaN	NaN	NaN
10	0.4	km	3	13.9743	NaN	NaN	NaN	72.1342	NaN	NaN	NaN
20	0.4	km	3	5.41194	57.3476	NaN	NaN	47.9315	156.733	NaN	NaN
30	0.4	km	3	4.40919	46.7411	NaN	NaN	38.5365	100.851	NaN	NaN
40	0.4	km	3	4.53165	21.7026	NaN	NaN	32.7563	64.6056	NaN	NaN
50	0.4	km	3	6.58757	23.7849	NaN	NaN	30.7972	54.9818	NaN	NaN
60	0.4	km	3	5.74725	15.7688	NaN	NaN	28.3151	46.4787	NaN	NaN
70	0.4	km	3	5.19827	15.0798	NaN	NaN	24.2642	41.4049	NaN	NaN
80	0.4	km	3	4.00876	9.71743	NaN	NaN	22.8507	36.65	NaN	NaN
90	0.4	km	3	5.16148	10.9212	NaN	NaN	23.183	36.0093	NaN	NaN
100	0.4	km	3	5.32781	9.3608	NaN	NaN	21.8393	33.6817	NaN	NaN
5	0.5	km	3	49.8371	NaN	NaN	NaN	149.055	NaN	NaN	NaN
10	0.5	km	3	26.1109	NaN	NaN	NaN	80.2973	NaN	NaN	NaN
20	0.5	km	3	14.8672	61.3675	NaN	NaN	49.6717	142.014	NaN	NaN
30	0.5	km	3	11.0065	44.6458	NaN	NaN	38.4544	95.8726	NaN	NaN
40	0.5	km	3	11.8017	25.457	NaN	NaN	35.8527	65.3651	NaN	NaN
50	0.5	km	3	11.933	22.3411	NaN	NaN	30.2682	52.0441	NaN	NaN
60	0.5	km	3	11.8722	17.1894	NaN	NaN	29.5993	51.1102	NaN	NaN
70	0.5	km	3	11.2697	14.6193	NaN	NaN	27.7177	42.0037	NaN	NaN
80	0.5	km	3	11.8012	12.4531	NaN	NaN	27.3278	39.1266	NaN	NaN
90	0.5	km	3	11.6344	10.9975	NaN	NaN	24.9952	34.5793	NaN	NaN
100	0.5	km	3	11.3627	9.74257	NaN	NaN	23.8649	31.3485	NaN	NaN
5	0.6	km	3	84.77	NaN	NaN	NaN	202.496	NaN	NaN	NaN
10	0.6	km	3	51.9713	NaN	NaN	NaN	122.988	NaN	NaN	NaN
20	0.6	km	3	31.3909	63.707	NaN	NaN	57.2067	141.976	NaN	NaN
30	0.6	km	3	27.2897	52.1424	NaN	NaN	50.4597	125.293	NaN	NaN
40	0.6	km	3	25.863	28.0763	NaN	NaN	41.8743	71.2396	NaN	NaN
50	0.6	km	3	24.4772	23.0937	NaN	NaN	37.9023	55.8346	NaN	NaN
60	0.6	km	3	23.1636	14.4763	NaN	NaN	35.4115	47.7448	NaN	NaN
70	0.6	km	3	24.0355	15.3148	NaN	NaN	34.3832	42.1861	NaN	NaN
80	0.6	km	3	22.9236	12.8245	NaN	NaN	32.673	40.1355	NaN	NaN
90	0.6	km	3	21.7852	9.40693	NaN	NaN	30.6561	33.3531	NaN	NaN
100	0.6	km	3	22.3273	8.06366	NaN	NaN	30.4336	30.7124	NaN	NaN
5	0.7	km	3	145.447	NaN	NaN	NaN	319.183	NaN	NaN	NaN
10	0.7	km	3	94.2782	NaN	NaN	NaN	175.161	NaN	NaN	NaN
20	0.7	km	3	58.378	54.4997	NaN	NaN	83.6621	140.278	NaN	NaN
30	0.7	km	3	51.0946	49.1287	NaN	NaN	64.9262	105.875	NaN	NaN
40	0.7	km	3	48.413	25.1472	NaN	NaN	59.4548	69.3521	NaN	NaN
50	0.7	km	3	46.9273	22.6276	NaN	NaN	54.4755	54.4445	NaN	NaN
60	0.7	km	3	44.587	15.4048	NaN	NaN	51.2569	45.3639	NaN	NaN
70	0.7	km	3	45.7347	15.779	NaN	NaN	52.2909	41.8298	NaN	NaN
80	0.7	km	3	43.8267	11.3106	NaN	NaN	49.0229	37.2266	NaN	NaN
90	0.7	km	3	44.9555	11.8757	NaN	NaN	49.7166	34.9396	NaN	NaN
100	0.7	km	3	44.1378	9.84111	NaN	NaN	49.0387	33.3223	NaN	NaN
5	0.8	km	3	208.423	NaN	NaN	NaN	310.3	NaN	NaN	NaN
10	0.8	km	3	186.151	NaN	NaN	NaN	304.013	NaN	NaN	NaN
20	0.8	km	3	128.066	58.4833	NaN	NaN	164.321	146.4	NaN	NaN
30	0.8	km	3	113.249	50.8584	NaN	NaN	130.948	106.151	NaN	NaN
40	0.8	km	3	100.381	25.2458	NaN	NaN	107.974	65.3491	NaN	NaN
50	0.8	km	3	95.8942	23.255	NaN	NaN	100.475	53.3622	NaN	NaN
60	0.8	km	3	92.4817	15.4646	NaN	NaN	96.5411	50.5817	NaN	NaN
70	0.8	km	3	88.9011	10.4774	NaN	NaN	92.3316	38.0014	NaN	NaN
80	0.8	km	3	88.9895	10.64	NaN	NaN	92.0079	37.5966	NaN	NaN
90	0.8	km	3	87.9127	9.69178	NaN	NaN	90.2148	33.1443	NaN	NaN
100	0.8	km	3	86.2907	8.16599	NaN	NaN	88.2237	31.7096	NaN	NaN
5	0.9	km	3	427.343	NaN	NaN	NaN	572.686	NaN	NaN	NaN
10	0.9	km	3	375.691	NaN	NaN	NaN	487.061	NaN	NaN	NaN
20	0.9	km	3	322.128	68.9687	NaN	NaN	423.726	137.538	NaN	NaN
30	0.9	km	3	269.957	53.7441	NaN	NaN	304.274	103.072	NaN	NaN
40	0.9	km	3	257.162	26.5184	NaN	NaN	313.091	69.8616	NaN	NaN
50	0.9	km	3	231.808	21.3002	NaN	NaN	248.194	52.6518	NaN	NaN
60	0.9	km	3	224.267	15.422	NaN	NaN	243.633	46.923	NaN	NaN
70	0.9	km	3	216.024	16.2602	NaN	NaN	223.905	43.7229	NaN	NaN
80	0.9	km	3	210.918	11.8068	NaN	NaN	215.462	37.2889	NaN	NaN
90	0.9	km	3	207.199	10.0822	NaN	NaN	210.861	32.4613	NaN	NaN
100	0.9	km	3	202.872	8.76705	NaN	NaN	205.435	31.9999	NaN	NaN
5	0.1	km	4	4.70484	NaN	NaN	NaN	141.339	NaN	NaN	NaN
10	0.1	km	4	2.54748	NaN	NaN	NaN	96.1051	NaN	NaN	NaN
20	0.1	km	4	1.98627	99.544	NaN	NaN	62.3669	225.773	NaN	NaN
30	0.1	km	4	-3.74671	70.5414	NaN	NaN	65.8722	202.445	NaN	NaN
40	0.1	km	4	-1.0365	31.5703	NaN	NaN	48.5092	84.2374	NaN	NaN
50	0.1	km	4	0.814048	32.1025	NaN	NaN	48.5156	80.9856	NaN	NaN
60	0.1	km	4	-0.689115	21.5312	NaN	NaN	35.9902	59.5898	NaN	NaN
70	0.1	km	4	2.16102	24.5497	NaN	NaN	38.3295	61.3471	NaN	NaN
80	0.1	km	4	-0.336571	14.7985	NaN	NaN	34.163	49	NaN	NaN
90	0.1	km	4	0.302736	14.7922	NaN	NaN	40.5238	47.9143	NaN	NaN
100	0.1	km	4	-0.1325	12.146	NaN	NaN	31.7922	43.0688	NaN	NaN
5	0.2	km	4	8.78107	NaN	NaN	NaN	143.302	NaN	NaN	NaN
10	0.2	km	4	-3.1229	NaN	NaN	NaN	86.3237	NaN	NaN	NaN
20	0.2	km	4	-0.0823942	96.7793	NaN	NaN	70.2989	261.425	NaN	NaN
30	0.2	km	4	0.395356	77.6859	NaN	NaN	62.3114	189.929	NaN	NaN
40	0.2	km	4	0.48427	41.8744	NaN	NaN	46.3975	102.711	NaN	NaN
50	0.2	km	4	1.68384	33.4567	NaN	NaN	44.3002	76.7291	NaN	NaN
60	0.2	km	4	1.98006	22.5087	NaN	NaN	48.3275	65.247	NaN	NaN
70	0.2	km	4	-1.44443	16.9458	NaN	NaN	38.9782	53.0903	NaN	NaN
80	0.2	km	4	2.14742	14.6977	NaN	NaN	41.1932	52.6993	NaN	NaN
90	0.2	km	4	0.907405	13.6258	NaN	NaN	34.3053	44.1101	NaN	NaN
100	0.2	km	4	-0.383371	11.0647	NaN	NaN	30.1301	39.2235	NaN	NaN
5	0.3	km	4	6.5137	NaN	NaN	NaN	125.306	NaN	NaN	NaN
10	0.3	km	4	5.52597	NaN	NaN	NaN	92.9916	NaN	NaN	NaN
20	0.3	km	4	2.8248	96.1379	NaN	NaN	72.5364	264.582	NaN	NaN
30	0.3	km	4	1.80536	79.3372	NaN	NaN	54.2627	167.648	NaN	NaN
40	0.3	km	4	-0.603703	36.2175	NaN	NaN	50.4139	106.354	NaN	NaN
50	0.3	km	4	2.91812	34.2315	NaN	NaN	53.0743	79.5736	NaN	NaN
60	0.3	km	4	-1.20713	19.5558	NaN	NaN	37.9768	64.0672	NaN	NaN
70	0.3	km	4	1.25757	20.926	NaN	NaN	39.5011	56.8837	NaN	NaN
80	0.3	km	4	2.02043	16.986	NaN	NaN	37.5988	51.9028	NaN	NaN
90	0.3	km	4	0.262785	12.7285	NaN	NaN	36.8486	43.5789	NaN	NaN
100	0.3	km	4	0.855435	11.4492	NaN	NaN	33.2577	43.8892	NaN	NaN
5	0.4	km	4	15.8187	NaN	NaN	NaN	143.193	NaN	NaN	NaN
10	0.4	km	4	12.3031	NaN	NaN	NaN	109.149	NaN	NaN	NaN
20	0.4	km	4	1.99486	86.2452	NaN	NaN	66.3696	244.977	NaN	NaN
30	0.4	km	4	1.68508	72.1502	NaN	NaN	53.564	159.604	NaN	NaN
40	0.4	km	4	1.27141	30.7075	NaN	NaN	45.292	90.6849	NaN	NaN
50	0.4	km	4	6.00273	34.1084	NaN	NaN	44.9151	77.0487	NaN	NaN
60	0.4	km	4	4.61668	23.9472	NaN	NaN	41.7431	65.4225	NaN	NaN
70	0.4	km	4	3.20243	21.2358	NaN	NaN	34.0498	56.2826	NaN	NaN
80	0.4	km	4	2.00851	13.6276	NaN	NaN	32.7394	48.0886	NaN	NaN
90	0.4	km	4	3.26549	15.0034	NaN	NaN	33.3495	47.5138	NaN	NaN
100	0.4	km	4	3.22715	12.518	NaN	NaN	29.9764	44.0733	NaN	NaN
5	0.5	km	4	48.6922	NaN	NaN	NaN	218.364	NaN	NaN	NaN
10	0.5	km	4	22.8429	NaN	NaN	NaN	108.013	NaN	NaN	NaN
20	0.5	km	4	10.6187	98.8508	NaN	NaN	67.5866	236.529	NaN	NaN
30	0.5	km	4	6.27649	70.8246	NaN	NaN	52.6687	156.79	NaN	NaN
40	0.5	km	4	8.8644	38.2268	NaN	NaN	52.3498	96.589	NaN	NaN
50	0.5	km	4	8.44525	32.5292	NaN	NaN	41.6029	74.917	NaN	NaN
60	0.5	km	4	8.5178	22.8862	NaN	NaN	42.1762	69.624	NaN	NaN
70	0.5	km	4	8.62667	21.2225	NaN	NaN	39.9136	57.0487	NaN	NaN
80	0.5	km	4	8.83601	17.9705	NaN	NaN	38.7581	52.9318	NaN	NaN
90	0.5	km	4	9.43856	15.9254	NaN	NaN	36.4817	46.7223	NaN	NaN
100	0.5	km	4	8.4315	13.2977	NaN	NaN	32.6407	40.9102	NaN	NaN
5	0.6	km	4	80.142	NaN	NaN	NaN	327.444	NaN	NaN	NaN
10	0.6	km	4	45.4888	NaN	NaN	NaN	172.808	NaN	NaN	NaN
20	0.6	km	4	22.5077	95.9636	NaN	NaN	67.9008	226.893	NaN	NaN
30	0.6	km	4	22.2166	86.5347	NaN	NaN	81.343	252.737	NaN	NaN
40	0.6	km	4	20.0836	40.4579	NaN	NaN	58.1162	102.302	NaN	NaN
50	0.6	km	4	18.2651	34.3867	NaN	NaN	46.6549	79.7978	NaN	NaN
60	0.6	km	4	16.9563	21.095	NaN	NaN	42.3086	64.7673	NaN	NaN
70	0.6	km	4	17.9286	21.3534	NaN	NaN	41.2619	57.0083	NaN	NaN
80	0.6	km	4	17.2007	18.5294	NaN	NaN	38.8977	54.3932	NaN	NaN
90	0.6	km	4	15.6908	14.3664	NaN	NaN	36.643	45.5559	NaN	NaN
100	0.6	km	4	16.8139	11.9825	NaN	NaN	37.3526	41.0196	NaN	NaN
5	0.7	km	4	162.352	NaN	NaN	NaN	512.571	NaN	NaN	NaN
10	0.7	km	4	96.8485	NaN	NaN	NaN	324.219	NaN	NaN	NaN
20	0.7	km	4	47.4826	87.7999	NaN	NaN	100.685	248.944	NaN	NaN
30	0.7	km	4	40.4549	80.1793	NaN	NaN	71.6595	181.174	NaN	NaN
40	0.7	km	4	37.5135	39.5591	NaN	NaN	63.0286	108.394	NaN	NaN
50	0.7	km	4	35.9534	33.4111	NaN	NaN	55.4863	75.465	NaN	NaN
60	0.7	km	4	33.1635	21.752	NaN	NaN	50.6045	62.4555	NaN	NaN
70	0.7	km	4	35.2084	21.4153	NaN	NaN	54.5083	56.4241	NaN	NaN
80	0.7	km	4	33.1425	16.1039	NaN	NaN	47.9662	49.1535	NaN	NaN
90	0.7	km	4	34.554	15.4456	NaN	NaN	47.4969	45.7838	NaN	NaN
100	0.7	km	4	34.238	13.4878	NaN	NaN	48.3814	43.4077	NaN	NaN
5	0.8	km	4	222.358	NaN	NaN	NaN	429.955	NaN	NaN	NaN
10	0.8	km	4	183.737	NaN	NaN	NaN	347.744	NaN	NaN	NaN
20	0.8	km	4	115.804	91.8669	NaN	NaN	178.369	251.588	NaN	NaN
30	0.8	km	4	100.595	79.9038	NaN	NaN	141.501	174.293	NaN	NaN
40	0.8	km	4	85.4181	35.1965	NaN	NaN	103.296	86.1464	NaN	NaN
50	0.8	km	4	80.9433	33.1327	NaN	NaN	91.5345	74.0186	NaN	NaN
60	0.8	km	4	78.3729	24.521	NaN	NaN	88.9497	75.869	NaN	NaN
70	0.8	km	4	75.2806	17.3448	NaN	NaN	85.0355	53.9006	NaN	NaN
80	0.8	km	4	73.5356	14.4175	NaN	NaN	82.2257	50.3885	NaN	NaN
90	0.8	km	4	73.5736	14.0873	NaN	NaN	79.6774	43.6155	NaN	NaN
100	0.8	km	4	70.2327	11.2765	NaN	NaN	75.2043	42.3474	NaN	NaN
5	0.9	km	4	493.67	NaN	NaN	NaN	782.868	NaN	NaN	NaN
10	0.9	km	4	442.745	NaN	NaN	NaN	675.66	NaN	NaN	NaN
20	0.9	km	4	364.897	111.795	NaN	NaN	603.684	236.269	NaN	NaN
30	0.9	km	4	301.198	85.6946	NaN	NaN	535.774	177.287	NaN	NaN
40	0.9	km	4	258.544	39.6205	NaN	NaN	360.259	105.342	NaN	NaN
50	0.9	km	4	229.131	30.5204	NaN	NaN	255.361	75.4164	NaN	NaN
60	0.9	km	4	216.913	20.5229	NaN	NaN	234.023	60.9836	NaN	NaN
70	0.9	km	4	213.192	22.4167	NaN	NaN	229.556	58.7586	NaN	NaN
80	0.9	km	4	203.596	16.5065	NaN	NaN	211.497	49.6906	NaN	NaN
90	0.9	km	4	200.304	14.5625	NaN	NaN	206.804	44.6358	NaN	NaN
100	0.9	km	4	196.934	13.0533	NaN	NaN	202.029	42.2606	NaN	NaN
5	0.1	km	5	2.91128	NaN	NaN	NaN	184.001	NaN	NaN	NaN
10	0.1	km	5	5.0837	NaN	NaN	NaN	127.672	NaN	NaN	NaN
20	0.1	km	5	2.73851	140.253	NaN	NaN	84.5693	345.678	NaN	NaN
30	0.1	km	5	-0.613451	109.173	NaN	NaN	116.296	386.657	NaN	NaN
40	0.1	km	5	-1.7226	40.3646	NaN	NaN	64.0028	110.221	NaN	NaN
50	0.1	km	5	0.0593029	40.4332	NaN	NaN	66.9631	103.222	NaN	NaN
60	0.1	km	5	-0.262267	27.9476	NaN	NaN	55.2627	76.5674	NaN	NaN
70	0.1	km	5	2.64925	28.2979	NaN	NaN	53.9362	74.2643	NaN	NaN
80	0.1	km	5	-0.0484116	17.8615	NaN	NaN	49.0877	59.5434	NaN	NaN
90	0.1	km	5	-0.665457	18.2636	NaN	NaN	44.834	57.2385	NaN	NaN
100	0.1	km	5	-0.858253	14.85	NaN	NaN	41.6851	49.5647	NaN	NaN
5	0.2	km	5	8.87542	NaN	NaN	NaN	181.655	NaN	NaN	NaN
10	0.2	km	5	-3.21593	NaN	NaN	NaN	116.409	NaN	NaN	NaN
20	0.2	km	5	-1.14766	130.723	NaN	NaN	93.794	379.928	NaN	NaN
30	0.2	km	5	-1.77552	102.589	NaN	NaN	78.4432	258.476	NaN	NaN
40	0.2	km	5	-0.191858	52.4616	NaN	NaN	60.8439	129.203	NaN	NaN
50	0.2	km	5	1.87529	44.1793	NaN	NaN	62.1297	98.3061	NaN	NaN
60	0.2	km	5	1.783	26.6764	NaN	NaN	71.4386	77.2975	NaN	NaN
70	0.2	km	5	-1.13804	22.1026	NaN	NaN	62.4295	65.404	NaN	NaN
80	0.2	km	5	3.91565	19.4021	NaN	NaN	68.3089	65.1734	NaN	NaN
90	0.2	km	5	1.81936	15.4796	NaN	NaN	60.292	52.543	NaN	NaN
100	0.2	km	5	-0.413104	13.2672	NaN	NaN	43.4129	47.3798	NaN	NaN
5	0.3	km	5	4.94093	NaN	NaN	NaN	169.935	NaN	NaN	NaN
10	0.3	km	5	6.34784	NaN	NaN	NaN	131.453	NaN	NaN	NaN
20	0.3	km	5	1.82132	135.598	NaN	NaN	98.9933	413.893	NaN	NaN
30	0.3	km	5	1.27225	108.423	NaN	NaN	71.4386	238.315	NaN	NaN
40	0.3	km	5	-2.95052	45.1209	NaN	NaN	67.519	139.46	NaN	NaN
50	0.3	km	5	3.82254	44.8355	NaN	NaN	90.0546	102.278	NaN	NaN
60	0.3	km	5	-2.19789	26.4031	NaN	NaN	49.986	81.8406	NaN	NaN
70	0.3	km	5	-0.220793	26.2545	NaN	NaN	48.624	70.6641	NaN	NaN
80	0.3	km	5	0.792118	19.1288	NaN	NaN	45.4157	60.3165	NaN	NaN
90	0.3	km	5	-0.865551	16.2826	NaN	NaN	44.3589	53.8054	NaN	NaN
100	0.3	km	5	0.874304	15.4071	NaN	NaN	44.7641	53.3872	NaN	NaN
5	0.4	km	5	11.1582	NaN	NaN	NaN	156.882	NaN	NaN	NaN
10	0.4	km	5	10.6295	NaN	NaN	NaN	140.776	NaN	NaN	NaN
20	0.4	km	5	0.40567	126.01	NaN	NaN	93.3697	396.29	NaN	NaN
30	0.4	km	5	-0.883947	98.0767	NaN	NaN	67.8333	223.53	NaN	NaN
40	0.4	km	5	0.637886	44.1612	NaN	NaN	62.2649	129.598	NaN	NaN
50	0.4	km	5	4.31955	41.1877	NaN	NaN	59.7664	94.9114	NaN	NaN
60	0.4	km	5	4.2027	29.9383	NaN	NaN	58.3272	80.8814	NaN	NaN
70	0.4	km	5	2.54918	27.5897	NaN	NaN	45.9316	71.1666	NaN	NaN
80	0.4	km	5	0.289098	17.1106	NaN	NaN	43.2506	58.9419	NaN	NaN
90	0.4	km	5	2.49572	19.3437	NaN	NaN	45.849	58.0847	NaN	NaN
100	0.4	km	5	1.3341	14.7649	NaN	NaN	39.6131	52.7768	NaN	NaN
5	0.5	km	5	45.7756	NaN	NaN	NaN	288.794	NaN	NaN	NaN
10	0.5	km	5	16.9289	NaN	NaN	NaN	136.552	NaN	NaN	NaN
20	0.5	km	5	8.37481	136.469	NaN	NaN	89.8686	350.361	NaN	NaN
30	0.5	km	5	5.86168	107.101	NaN	NaN	79.6063	262.32	NaN	NaN
40	0.5	km	5	6.9321	46.0764	NaN	NaN	72.9958	118.998	NaN	NaN
50	0.5	km	5	6.73319	41.2659	NaN	NaN	57.1398	94.5175	NaN	NaN
60	0.5	km	5	6.48735	28.5451	NaN	NaN	57.2229	86.2747	NaN	NaN
70	0.5	km	5	7.11105	26.076	NaN	NaN	56.5095	69.0341	NaN	NaN
80	0.5	km	5	6.9916	23.4084	NaN	NaN	55.4726	64.5841	NaN	NaN
90	0.5	km	5	6.97439	17.1461	NaN	NaN	52.1726	53.6616	NaN	NaN
100	0.5	km	5	7.44417	16.2556	NaN	NaN	50.3925	48.8408	NaN	NaN
5	0.6	km	5	77.5551	NaN	NaN	NaN	490.255	NaN	NaN	NaN
10	0.6	km	5	38.0681	NaN	NaN	NaN	218.929	NaN	NaN	NaN
20	0.6	km	5	15.3878	126.779	NaN	NaN	80.0027	315.755	NaN	NaN
30	0.6	km	5	17.8241	119.081	NaN	NaN	134.67	451.829	NaN	NaN
40	0.6	km	5	15.4882	52.012	NaN	NaN	80.2337	130.579	NaN	NaN
50	0.6	km	5	13.1209	43.567	NaN	NaN	58.7511	103.019	NaN	NaN
60	0.6	km	5	12.4993	26.2822	NaN	NaN	53.878	82.1462	NaN	NaN
70	0.6	km	5	12.6393	25.4676	NaN	NaN	53.133	68.4754	NaN	NaN
80	0.6	km	5	13.1739	22.2374	NaN	NaN	48.9265	66.1796	NaN	NaN
90	0.6	km	5	12.4671	19.2285	NaN	NaN	49.2971	57.0155	NaN	NaN
100	0.6	km	5	12.6275	15.6408	NaN	NaN	44.6576	50.3089	NaN	NaN
5	0.7	km	5	174.399	NaN	NaN	NaN	722.083	NaN	NaN	NaN
10	0.7	km	5	96.4254	NaN	NaN	NaN	456.324	NaN	NaN	NaN
20	0.7	km	5	36.1613	114.62	NaN	NaN	118.436	373.181	NaN	NaN
30	0.7	km	5	33.9796	112.551	NaN	NaN	85.0553	259.838	NaN	NaN
40	0.7	km	5	30.9553	53.3276	NaN	NaN	76.6732	145.974	NaN	NaN
50	0.7	km	5	29.102	42.5194	NaN	NaN	67.3475	94.5163	NaN	NaN
60	0.7	km	5	25.377	29.1523	NaN	NaN	58.944	84.9548	NaN	NaN
70	0.7	km	5	28.1377	26.1912	NaN	NaN	68.6487	69.8503	NaN	NaN
80	0.7	km	5	25.9673	19.704	NaN	NaN	55.701	59.2829	NaN	NaN
90	0.7	km	5	27.1513	17.6894	NaN	NaN	53.4528	53.3356	NaN	NaN
100	0.7	km	5	27.4627	16.0369	NaN	NaN	58.3764	52.8051	NaN	NaN
5	0.8	km	5	236.138	NaN	NaN	NaN	580.816	NaN	NaN	NaN
10	0.8	km	5	173.122	NaN	NaN	NaN	369.772	NaN	NaN	NaN
20	0.8	km	5	103.194	129.262	NaN	NaN	193.611	389.093	NaN	NaN
30	0.8	km	5	85.8172	108.132	NaN	NaN	146.366	257.469	NaN	NaN
40	0.8	km	5	74.6378	45.6374	NaN	NaN	111.137	121.091	NaN	NaN
50	0.8	km	5	67.5711	41.4229	NaN	NaN	86.574	91.325	NaN	NaN
60	0.8	km	5	65.9504	29.5532	NaN	NaN	88.2111	90.2962	NaN	NaN
70	0.8	km	5	63.7707	22.5339	NaN	NaN	86.0865	66.6138	NaN	NaN
80	0.8	km	5	62.6413	17.3116	NaN	NaN	83.0868	59.8582	NaN	NaN
90	0.8	km	5	62.4978	17.3066	NaN	NaN	76.9203	52.8332	NaN	NaN
100	0.8	km	5	57.3942	13.7315	NaN	NaN	67.266	49.1363	NaN	NaN
5	0.9	km	5	568.021	NaN	NaN	NaN	1029.36	NaN	NaN	NaN
10	0.9	km	5	454.787	NaN	NaN	NaN	720.291	NaN	NaN	NaN
20	0.9	km	5	392.928	158.64	NaN	NaN	749.296	347.415	NaN	NaN
30	0.9	km	5	318.243	117.381	NaN	NaN	796.788	264.03	NaN	NaN
40	0.9	km	5	240.733	47.6761	NaN	NaN	307.573	127.088	NaN	NaN
50	0.9	km	5	215.097	39.4585	NaN	NaN	242.324	99.7922	NaN	NaN
60	0.9	km	5	206.419	24.4556	NaN	NaN	232.358	73.588	NaN	NaN
70	0.9	km	5	200.64	28.3104	NaN	NaN	228.283	73.7243	NaN	NaN
80	0.9	km	5	189.868	20.1423	NaN	NaN	201.629	61.3219	NaN	NaN
90	0.9	km	5	184.224	17.8007	NaN	NaN	193.96	53.7536	NaN	NaN
100	0.9	km	5	182.377	15.3439	NaN	NaN	190.959	49.9904	NaN	NaN
