# Supplementary material for: Comparison of Methods for Analyzing Left-Censored Occupational Exposure Data
Source: Oxford University Press journal article supplement (doi:10.1093/annhyg/meu067), 2014-09-26
Supplement: meu067_Supplementary_Data.zip [file meu067_Supplementary_Data.zip › Derivation_for_the_beta_factor_and_the_K_M_algorithm_REVISED.pdf]

# COMPARISON OF METHODS FOR ANALYZING LEFT-CENSORED OCCUPATIONAL EXPOSURE DATA

## Supplemental Materials

Tran Huynh, Gurumurthy Ramachandran, Sudipto Banerjee, Joao Monteiro, Mark Stenzel, Dale P. Sandler, Lawrence S. Engel, Richard K. Kwok, Aaron Blair and Patricia A. Stewart

## 1 Details for $\beta$ -substitution

The details for the following derivation of  $\beta_{GM}$  were provided by Gary Ganser. The derivation for  $\beta_{AM}$  proceeds in a similar fashion.

### 1.1 Distributional properties

We let  $x_i$  be a lognormally distributed random variable with LOD  $L$  for  $i = 1, \dots, n$ , where  $n$  denotes the sample size. This implies that  $y_i = \log x_i$  is Normally distributed with mean  $\mu$  and variance  $\sigma^2$ . Assume  $k$  of our observations are below the limit of detection such that we only observe  $y_i$  for  $i = 1, \dots, (n - k)$ . That is,  $y_i \in (\log L, \infty)$  follows a truncated Normal distribution with pdf

$$f(y_i | \mu, \sigma^2) = \frac{\exp[-(y_i - \mu)^2 / 2\sigma^2]}{\int_{\log L}^{\infty} \exp[-(u - \mu)^2 / 2\sigma^2] du}, \quad (1)$$

which has  $E[y_i | \mu, \sigma^2] = \mu + f(z)\sigma$ , where  $z = (\log L - \mu) / \sigma$ ; for the sake of notation, we shall suppress the conditioning on  $\mu$  and  $\sigma^2$  from our remaining equations. This implies that if we let  $\bar{y} = \sum_i^{n-k} y_i / (n - k)$ , then  $E[\bar{y}] = \mu + f(z)\sigma$ , as well. Another property of the truncated Normal distribution is that the moment generating function is

$$E[e^{ry}] = \exp\left[r\mu + \frac{\sigma^2 r^2}{2}\right] \times \left[\frac{\int_{\frac{\log L - (r\mu + \sigma^2 r^2)}{\sigma}}^{\infty} \exp[-v^2/2] dv}{\int_{\frac{\log L - \mu}{\sigma}}^{\infty} \exp[-v^2/2] dv}\right] = \exp\left[r\mu + \frac{\sigma^2 r^2}{2}\right] X(r). \quad (2)$$

## 1.2 Derivation for $\beta_{GM}$

Given these properties, we will derive an estimate for  $\beta_{GM}$ . First note that

$$\exp [\widehat{\mu}(\beta_{GM})] = (x_1 x_2 \cdots x_{n-k})^{1/n} (\beta_{GM} L)^{k/n} = \exp \left[ \sum_{i=1}^{n-k} y_i / (n-k) \right] (\beta_{GM} L)^{k/n}. \quad (3)$$

Using (2), we find

$$\begin{aligned} E(\exp [\widehat{\mu}(\beta_{GM})]) &= E \left( \exp \left[ \sum_{i=1}^{n-k} y_i / (n-k) \right] (\beta_{GM} L)^{k/n} \right) = \prod_{i=1}^{n-k} E [e^{(1/n)y_i}] (\beta_{GM} L)^{k/n} \\ &= (E [e^{(1/n)y_1}])^{n-k} (\beta_{GM} L)^{k/n} \\ &= (\exp [(1/n)\mu + \sigma^2(1/n)^2/2] X(1/n))^{n-k} (\beta_{GM} L)^{k/n} \\ &= \exp \left[ \frac{n-k}{n} \mu + \frac{n-k}{2n^2} \sigma^2 + (n-k) \log X\left(\frac{1}{n}\right) + \frac{k}{n} \log \beta_{GM} + \frac{k}{n} \log L \right] \\ &= e^\mu \exp \left[ \frac{-k}{n} \mu + \frac{n-k}{2n^2} \sigma^2 + (n-k) \log X\left(\frac{1}{n}\right) + \frac{k}{n} \log \beta_{GM} + \frac{k}{n} \log L \right] \\ &= e^\mu \exp [g(\beta_{GM})]. \end{aligned} \quad (4)$$

If we can solve  $g(\beta_{GM}) = 0$  for  $\beta_{GM}$  in (4), then  $E(\exp [\widehat{\mu}(\beta_{GM})]) = e^\mu$  as we desire. That is, we need

$$\begin{aligned} \log \beta_{GM} &= -\frac{n}{k} \left( \frac{-k}{n} \mu + \frac{n-k}{2n^2} \sigma^2 + (n-k) \log X(1/n) + (k/n) \log L \right) \\ &= \mu - \log L - \frac{n-k}{2kn} \sigma^2 - \frac{n(n-k)}{k} \log X(1/n) \\ &= -z\sigma - \frac{n-k}{2kn} \sigma^2 - \frac{n(n-k)}{k} \log X(1/n). \end{aligned} \quad (5)$$

To do this, we first note that, for large  $n$ ,

$$\begin{aligned} k/n &\approx P(X < L) = P\left(\frac{\log X - \mu}{\sigma} < \frac{\log L - \mu}{\sigma} = z\right) = \frac{1}{\sqrt{2\pi}} \int_{-\infty}^z e^{v^2/2} dv \\ \implies z &\approx \hat{z} = \Phi^{-1}(k/n), \end{aligned} \quad (6)$$

where  $\Phi(\cdot)$  denotes the cdf of a Normal distribution and  $\Phi^{-1}(\cdot)$  denotes the inverse cdf.

Then, using the expression for  $E[\bar{y}]$  and the definition of  $z$ , we find

$$\begin{aligned} \sigma &= \frac{\log L - \mu}{z} = \frac{\log L - [E(\bar{y}) - \sigma f(z)]}{z} = \frac{\log L - E(\bar{y})}{z} + \sigma f(z)/z \\ \implies \sigma &= \frac{\log L - E(\bar{y})}{z} \frac{z}{z - f(z)} = \frac{\log L - E(\bar{y})}{z - f(z)} \\ &\approx \hat{s}_y = \frac{\log L - \bar{y}}{\hat{z} - f(\hat{z})}. \end{aligned} \quad (7)$$

Lastly, we can approximate

$$\begin{aligned} X(1/n) &= \left[ \frac{\int_{(\log L - (\frac{1}{n}\mu + \sigma^2 \frac{1}{n^2}))/\sigma}^{\infty} \exp[-v^2/2] dv}{\int_{(\log L - \mu)/\sigma}^{\infty} \exp[-v^2/2] dv} \right] \\ &\approx f(\hat{s}_y, \hat{z}) = \frac{1 - \Phi(\hat{z} - \hat{s}_y/n)}{1 - \Phi(\hat{z})} \end{aligned} \quad (8)$$

Finally, plugging the expressions from (6), (7), and 8 into (5), we obtain

$$\begin{aligned} \beta_{GM} &= \exp \left[ -z\sigma - \frac{n-k}{2kn} \sigma^2 - \frac{n(n-k)}{k} \log X(1/n) \right] \\ &\approx \exp \left[ -\hat{z}\hat{s}_y - \frac{n-k}{2kn} \hat{s}_y^2 - \frac{n(n-k)}{k} \log f(\hat{s}_y, \hat{z}) \right]. \end{aligned}$$

## 2 Details for Kaplan-Meier Method

The equations for the K-M method can be found in the EPA ProUCL Technical Guide (EPA, 2007). Beal (2009) also described the method and provided SAS macro for it.

Suppose out of a sample of  $n$  exposure concentrations,  $k$  have values below their respective limits of detection. We can define indicator variables,  $d_1, \dots, d_n$ , such that  $d_i = 1$  if the  $i$ th observation is above its limit of detection and  $d_i = 0$  if the  $i$ th observation is censored. We then let  $x_1, \dots, x_n$  be a vector of concentrations such that  $x_i$  equals the  $i$ th concentration when  $d_i = 1$  and equals  $LOD_i$  when  $d_i = 0$ . Without loss of generality, we assume the  $x_i$  are sorted in ascending order such that  $x_1 \leq x_2 \leq \dots \leq x_n$ .

To compute the K-M estimate of the arithmetic mean,  $AM$ , we let  $x_1^*, \dots, x_p^*$  denote  $p$  distinct values (sorted in ascending order) at which concentrations above the limit of detection are observed such that  $p \leq (n - k)$ . For  $j = 1, \dots, p$ , let

$$m_j = \sum_i d_i \times I(x_i = x_j^*)$$

$$n_j = \sum_i I(x_i \leq x_j^*),$$

where  $I(\cdot)$  is a 0/1 indicator function; i.e.,  $m_j$  is the number of detected concentrations equal to  $x_j^*$  and  $n_j$  counts the number of concentrations (both detected and nondetected) less than or equal to  $x_j^*$ . We then define an empirical cdf,  $F(\cdot)$  as

$$F(x) = \begin{cases} 1 & x \geq x_p^* \\ \prod_{j: x_j^* > x} \frac{n_j - m_j}{n_j} & x_1^* \leq x \leq x_{p-1}^* \\ \prod_{j=1}^p \frac{n_j - m_j}{n_j} & x_1 \leq x \leq x_1^* \\ 0 & 0 \leq x \leq x_1 \end{cases}.$$

From this, we can estimate  $AM$  as

$$\widehat{AM} = \sum_{j=1}^p x_j^* [F(x_j^*) - F(x_{j-1}^*)], \quad (9)$$

where  $F(x_0^*) = 0$ .
