# Supplementary material for: Comparison of Methods for Analyzing Left-Censored Occupational Exposure Data
Source: Oxford University Press journal article supplement (doi:10.1093/annhyg/meu067), 2014-09-26
Supplement: meu067_Supplementary_Data.zip [file meu067_Supplementary_Data.zip › supplementary_material_13_0265.R2_FINAL.docx]

**­SUPPLEMENTARY MATERIAL**

**COMPARISON OF METHODS FOR ANALYZING LEFT-CENSORED OCCUPATIONAL EXPOSURE DATA**

Tran Huynh1, Gurumurthy Ramachandran1*, Sudipto Banerjee1, Joao Monteiro1, Mark Stenzel2, Dale P. Sandler3, Lawrence S. Engel3,4, Richard K. Kwok3, Aaron Blair5, and Patricia A. Stewart6

1 University of Minnesota, Division of Environmental Health Sciences, School of Public Health, Minneapolis, MN

2 Exposure Assessment Applications, LLC, Arlington, VA

3 National Institute of Environmental Health Sciences, Research Triangle Park, NC

4 University of North Carolina at Chapel Hill, Chapel Hill, NC

5 National Cancer Institute, Rockville, MD

6 Stewart Exposure Assessments, LLC, Arlington, VA

Address correspondence to: Gurumurthy Ramachandran. University of Minnesota, Division of Environmental Health Sciences, School of Public Health, Minneapolis, MN

420 Delaware St. S.E., Minneapolis, MN 55455, USA; email: ramac002@umn.edu

**Results of the estimates of bias and root mean squared error (rMSE) for a lognormal and single LOD and mixed distributions simulations**

Figures 1 - 2 are the estimates of bias and rMSE of the GM from a lognormal and multiple LODs simulation.

Figures 3 - 10 are the estimates of bias and rMSE of the AM, GM, GSD, and X0.95  from a lognormal and single LOD simulation.

Figure 11 – 12 are the estimates of the bias and rMSE of the AM from a mixed distribution with GM of 1 and 5 and multiple LODs simulation.

Figure 13 – 14 are the estimates of the bias and rMSE of the 95th percentile from a mixed distribution with GM of 1 and 5 and multiple LODs simulation.

Figure 15 – 16 are the estimates of the bias and rMSE of the 95th percentile from a mixed distribution with GM of 1 and 10 and multiple LODs simulation.

**ML**

**GSD=5**

**GSD=4**

**GSD=3**

**GSD=2**

**β-substitution**

Figure 1: Relative bias in the estimate of the GM of a lognormal distribution and multiple LODs for different sample sizes, percent censoring, and GSDs for the β-substitution and the ML methods. The K-M method does not compute GM and GSD.

**ML**

**GSD=5**

**GSD=4**

**GSD=3**

**GSD=2**

**β-substitution**

Figure 2: Relative rMSE in the estimate of the GM of a lognormal distribution and multiple LODs for different sample sizes, percent censoring, and GSDs for the β-substitution and the ML methods. The K-M method does not compute GM and GSD.

**ML**

**MVUE**

**ML**

**MLE**

**K-M**

**GSD=5**

**GSD=4**

**GSD=3**

**GSD=2**

**β-substitution**

Figure 3: Relative bias in the estimate of the AM of a lognormal distribution and single LOD for different sample sizes, percent censoring, and GSDs for the β-substitution, the ML, and the K-M methods. MLMLE and MLMVUE denote two different ways of estimating the AM from the ML estimates of µ and σ from the log-transformed data.

**ML**

**MVUE**

**ML**

**MLE**

**K-M**

**GSD=5**

**GSD=4**

**GSD=3**

**GSD=2**

**β-substitution**

Figure 4: Relative rMSE in the estimate of the AM of a lognormal distribution and single LOD for different sample sizes, percent censoring, and GSDs for the β-substitution, the ML, and the K-M methods. MLMLE and MLMVUE denote two different ways of estimating the AM from the ML estimates of µ and σ from the log-transformed data.

**ML**

**GSD=5**

**GSD=4**

**GSD=3**

**GSD=2**

**β-substitution**

Figure 5: Relative bias in the estimate of the GM of a lognormal distribution and single LOD for different sample sizes, percent censoring, and GSDs for the β-substitution and the ML methods. The K-M method does not compute GM and GSD.

**ML**

**GSD=5**

**GSD=4**

**GSD=3**

**GSD=2**

**β-substitution**

Figure 6: Relative rMSE in the estimate of the GM of a lognormal distribution and multiple LODs for different sample sizes, percent censoring, and GSDs for the β-substitution and the ML methods. The K-M method does not compute GM and GSD.

**ML**

**GSD=5**

**GSD=4**

**GSD=3**

**GSD=2**

**β-substitution**

Figure 7: Relative bias in the estimate of the GSD of a lognormal distribution and single LOD for different sample sizes, percent censoring, and GSDs for the β-substitution and the ML methods. The K-M method does not compute GM and GSD.

**ML**

**GSD=5**

**GSD=4**

**GSD=3**

**GSD=2**

**β-substitution**

Figure 8: Relative rMSE in the estimate of the GSD of a lognormal distribution and single LOD for different sample sizes, percent censoring, and GSDs for the β-substitution and the ML methods. The K-M method does not compute GM and GSD.

**ML**

**K-M**

**GSD=5**

**GSD=4**

**GSD=3**

**GSD=2**

**β-substitution**

Figure 9: Relative bias in the estimate of the 95th percentile of a lognormal distribution and single LOD for different sample sizes, percent censoring, and GSDs for the β-substitution and the ML methods.

**ML**

**K-M**

**GSD=5**

**GSD=4**

**GSD=3**

**GSD=2**

**β-substitution**

Figure 10: Relative rMSE in the estimate of the 95th percentile of a lognormal distribution and single LOD for different sample sizes, percent censoring, and GSDs for the β-substitution and the ML methods.

**ML**

**MVUE**

**ML**

**MLE**

**K-M**

**GSD=5**

**GSD=4**

**GSD=3**

**GSD=2**

**β-substitution**

Figure 11: Relative bias in the estimate of the AM of a mixed distribution with the GMs of 1 and 5, and multiple LODs for different sample sizes, percent censoring, and GSDs for the β-substitution and the ML methods. MLMLE and MLMVUE denote two different ways of estimating the AM from the ML estimates of µ and σ from the log-transformed data.

**K-M**

**ML**

**MVUE**

**ML**

**MLE**

**GSD=5**

**GSD=4**

**GSD=3**

**GSD=2**

**β-substitution**

Figure 12: Relative rMSE in the estimate of the AM of a mixed distribution with the GMs of 1 and 5, and multiple LODs for different sample sizes, percent censoring, and GSDs for the β-substitution and the ML methods. MLMLE and MLMVUE denote two different ways of estimating the AM from the ML estimates of µ and σ from the log-transformed data.

**ML**

**K-M**

**GSD=5**

**GSD=4**

**GSD=3**

**GSD=2**

**β-substitution**

Figure 13: Relative bias in the estimate of the 95th percentile of a mixed distribution with the GMs of 1 and 5, and multiple LODs for different sample sizes, percent censoring, and GSDs for the β-substitution and the ML methods.

**ML**

**K-M**

**GSD=5**

**GSD=4**

**GSD=3**

**GSD=2**

**β-substitution**

Figure 14: Relative rMSE in the estimate of the 95th percentile of a mixed distribution with the GMs of 1 and 10, and multiple LODs for different sample sizes, percent censoring, and GSDs for the β-substitution and the ML methods.

**K-M**

**ML**

**GSD=5**

**GSD=4**

**GSD=3**

**GSD=2**

**β-substitution**

Figure 15: Relative bias in the estimate of the 95th percentile of a mixed distribution with the GMs of 1 and 10, and multiple LODs for different sample sizes, percent censoring, and GSDs for the β-substitution and the ML methods.

**K-M**

**ML**

**GSD=5**

**GSD=4**

**GSD=3**

**GSD=2**

**β-substitution**

Figure 16: Relative rMSE in the estimate of the 95th percentile of a mixed distribution with the GMs of 1 and 10, and multiple LODs for different sample sizes, percent censoring, and GSDs for the β-substitution and the ML methods.
